# Supplementary material for: Sorting Five Human Tumor Types Reveals Specific Biomarkers and Background Classification Genes
Source: Sci Rep. 2018 May 25;8:8180. doi: 10.1038/s41598-018-26310-x (PMC5970138; doi:10.1038/s41598-018-26310-x)
Supplement: Supplementary file 3 — Supplemental Table 1 [file 41598_2018_26310_MOESM3_ESM.xlsx]

## Sheet: Supplemental Table 1
Sorting Five Human Tumor Types Reveals Specific Biomarkers and Background Classification Genes
Kimberly E. Roche, Marvin Weinstein, Leland Dunwoodie, William L. Poehlman, and Frank A. Feltus
Supplemental Table 1. Forty eight core transcript features from thirty seven loci that cluster the tumor subtypes via DQC.
UCSC ID	Gencode ID	Description
UC010TYT.1, UC011AIM.1, UC010YTR.1	ABPARTS	Antibody
UC003SOT.3	ACTB	This gene encodes one of six different actin proteins. Actins are highly conserved proteins that are involved in cell motility, structure, and integrity. This actin is a major constituent of the contractile apparatus and one of the two nonmuscle cytoskeletal actins.
UC002KAL.1	ACTG1	Actins are highly conserved proteins that are involved in various types of cell motility, and maintenance of the cytoskeleton. In vertebrates, three main groups of actin isoforms, alpha, beta and gamma have been identified. The alpha actins are found in muscle tissues and are a major constituent of the contractile apparatus. The beta and gamma actins co-exist in most cell types as components of t…
UC001ZUC.2	B2M	This gene encodes a serum protein found in association with the major histocompatibility complex (MHC) class I heavy chain on the surface of nearly all nucleated cells. The protein has a predominantly beta-pleated sheet structure that can form amyloid fibrils in some pathological conditions. The encoded antimicrobial protein displays antibacterial activity in amniotic fluid. A mutation in this ge…
UC011MFH.1	BC018860	Unknown mitochondrial "gene".
UC001FPP.2	BCAN	This gene encodes a member of the lectican family of chondroitin sulfate proteoglycans that is specifically expressed in the central nervous system. This protein is developmentally regulated and may function in the formation of the brain extracellular matrix. This protein is highly expressed in gliomas and may promote the growth and cell motility of brain tumor cells. Alternate splicing results i…
UC003LSD.2	CD74	Homotrimer. In the endoplasmic reticulum (ER) it forms a heterononameric MHC II-Ii complex: 3 MHC class II molecules (heterodimers of an alpha and a beta subunit) bind to the CD74 homotrimer (also known as invariant chain or HLA class II histocompatibility antigen gamma chain). In the endosomal/lysosomal system, the CD74 component undergoes sequential degradation by various proteases, including C…
UC003XFZ.1	CLU	The protein encoded by this gene is a secreted chaperone that can under some stress conditions also be found in the cell cytosol. It has been suggested to be involved in several basic biological events such as cell death, tumor progression, and neurodegenerative disorders. Alternate splicing results in both coding and non-coding variants
UC002IQM.2	COL1A1	This gene encodes the pro-alpha1 chains of type I collagen whose triple helix comprises two alpha1 chains and one alpha2 chain. Type I is a fibril-forming collagen found in most connective tissues and is abundant in bone, cornea, dermis and tendon. Mutations in this gene are associated with osteogenesis imperfecta types I-IV, Ehlers-Danlos syndrome type VIIA, Ehlers-Danlos syndrome Classical type…
UC003UNG.1	COL1A2	This gene encodes the pro-alpha2 chain of type I collagen whose triple helix comprises two alpha1 chains and one alpha2 chain. Type I is a fibril-forming collagen found in most connective tissues and is abundant in bone, cornea, dermis and tendon. Mutations in this gene are associated with osteogenesis imperfecta types I-IV, Ehlers-Danlos syndrome type VIIB, recessive Ehlers-Danlos syndrome Class…
UC002UQJ.1	COL3A1	This gene encodes the pro-alpha1 chains of type III collagen, a fibrillar collagen that is found in extensible connective tissues such as skin, lung, uterus, intestine and the vascular system, frequently in association with type I collagen. Mutations in this gene are associated with Ehlers-Danlos syndrome types IV, and with aortic and arterial aneurysms.
UC003WUQ.2	CTSB	This gene encodes a member of the C1 family of peptidases. Alternative splicing of this gene results in multiple transcript variants. At least one of these variants encodes a preproprotein that is proteolytically processed to generate multiple protein products. These products include the cathepsin B light and heavy chains, which can dimerize to form the double chain form of the enzyme. This enzym…
UC004COY.2	CYBB	Cytochrome b (-245) is composed of cytochrome b alpha (CYBA) and beta (CYBB) chain. It has been proposed as a primary component of the microbicidal oxidase system of phagocytes. CYBB deficiency is one of five described biochemical defects associated with chronic granulomatous disease (CGD). In this disorder, there is decreased activity of phagocyte NADPH oxidase; neutrophils are able to phagocyti…
UC001YRZ.1	DKFZp686O16217	Putative uncharacterized protein DKFZp686O16217
UC003PHI.2	EEF1A1	This gene encodes an isoform of the alpha subunit of the elongation factor-1 complex, which is responsible for the enzymatic delivery of aminoacyl tRNAs to the ribosome. This isoform (alpha 1) is expressed in brain, placenta, lung, liver, kidney, and pancreas, and the other isoform (alpha 2) is expressed in brain, heart and skeletal muscle. This isoform is identified as an autoantigen in 66% of p…
UC002LZE.2	EEF2	This gene encodes a member of the GTP-binding translation elongation factor family. This protein is an essential factor for protein synthesis. It promotes the GTP-dependent translocation of the nascent protein chain from the A-site to the P-site of the ribosome. This protein is completely inactivated by EF-2 kinase phosporylation.
UC002VFB.2, UC002VFE.2, UC010ZJP.1, UC002VFI.2	FN1	This gene encodes fibronectin, a glycoprotein present in a soluble dimeric form in plasma, and in a dimeric or multimeric form at the cell surface and in extracellular matrix. Fibronectin is involved in cell adhesion and migration processes including embryogenesis, wound healing, blood coagulation, host defense, and metastasis. The gene has three regions subject to alternative splicing, with the …
UC001NSU.2	FTH1	This gene encodes the heavy subunit of ferritin, the major intracellular iron storage protein in prokaryotes and eukaryotes. It is composed of 24 subunits of the heavy and light ferritin chains. Variation in ferritin subunit composition may affect the rates of iron uptake and release in different tissues. A major function of ferritin is the storage of iron in a soluble and nontoxic state. Defects…
UC001QOP.1	GAPDH	This gene encodes a member of the glyceraldehyde-3-phosphate dehydrogenase protein family. The encoded protein has been identified as a moonlighting protein based on its ability to perform mechanistically distinct functions. The product of this gene catalyzes an important energy-yielding step in carbohydrate metabolism, the reversible oxidative phosphorylation of glyceraldehyde-3-phosphate in the…
UC002IHQ.2	GFAP	This gene encodes one of the major intermediate filament proteins of mature astrocytes. It is used as a marker to distinguish astrocytes from other glial cells during development. Mutations in this gene cause Alexander disease, a rare disorder of astrocytes in the central nervous system. Alternative splicing results in multiple transcript variants encoding distinct isoforms.
UC001LVF.2	IGF2	The insulin-like growth factors possess growth-promoting activity. In vitro, they are potent mitogens for cultured cells. IGF-II is influenced by placental lactogen and may play a role in fetal development. Preptin undergoes glucose-mediated co-secretion with insulin, and acts as physiological amplifier of glucose-mediated insulin secretion. Exhibits osteogenic properties by increasing osteoblast…
UC001YSE.2	IGHG1	IGHG1 (Immunoglobulin Heavy Constant Gamma 1 (G1m Marker)) is a Protein Coding gene. Diseases associated with IGHG1 include heavy chain deposition disease and chronic lymphocytic leukemia. Among its related pathways are Immune System and Regulation of actin dynamics for phagocytic cup formation. GO annotations related to this gene include antigen binding. An important paralog of this gene is IGHG…
UC002STJ.1	IGKC	IGKC (Immunoglobulin Kappa Constant) is a Protein Coding gene. Diseases associated with IGKC include kappa light chain deficiency and light chain deposition disease. Among its related pathways are PI3K/AKT Signaling in Cancer and Immune System. GO annotations related to this gene include antigen binding. An important paralog of this gene is IGLC1.
UC002HXF.1	KRT14	This gene encodes a member of the keratin family, the most diverse group of intermediate filaments. This gene product, a type I keratin, is usually found as a heterotetramer with two keratin 5 molecules, a type II keratin. Together they form the cytoskeleton of epithelial cells. Mutations in the genes for these keratins are associated with epidermolysis bullosa simplex. At least one pseudogene ha…
UC002HXH.2	KRT17	This gene encodes the type I intermediate filament chain keratin 17, expressed in nail bed, hair follicle, sebaceous glands, and other epidermal appendages. Mutations in this gene lead to Jackson-Lawler type pachyonychia congenita and steatocystoma multiplex
UC001SAN.2	KRT5	The protein encoded by this gene is a member of the keratin gene family. The type II cytokeratins consist of basic or neutral proteins which are arranged in pairs of heterotypic keratin chains coexpressed during differentiation of simple and stratified epithelial tissues. This type II cytokeratin is specifically expressed in the basal layer of the epidermis with family member KRT14. Mutations in …
UC001SAM.2	KRT6A	The protein encoded by this gene is a member of the keratin gene family. The type II cytokeratins consist of basic or neutral proteins which are arranged in pairs of heterotypic keratin chains coexpressed during differentiation of simple and stratified epithelial tissues. As many as six of this type II cytokeratin (KRT6) have been identified; the multiplicity of the genes is attributed to success…
UC004COX.3	MT-ND5	MT-ND5 (Mitochondrially Encoded NADH Dehydrogenase 5) is a Protein Coding gene. Diseases associated with MT-ND5 include melas, mt-nd5-related and leber hereditary optic neuropathy. Among its related pathways are Metabolism and Respiratory electron transport, ATP synthesis by chemiosmotic coupling, and heat production by uncoupling proteins.. GO annotations related to this gene include NADH dehydr…
UC004COU.3, UC011MFI.1	OK/SW-cl.16	One isolated cDNA from the library encoded OK/SW-CL.16 protein with a segment similar to known actinin-interacting regions. OK/SW-CL.16 protein also contained the class I PxxP motif, which can participate in binding to Src homology 3 (SH3) domain-containing signaling proteins. In vitro affinity assays showed interactions of recombinant actinin-4 R1 and full-length renal actinin-4 with recombinant…
UC001FVK.2	PEA15	This gene encodes a death effector domain-containing protein that functions as a negative regulator of apoptosis. The encoded protein is an endogenous substrate for protein kinase C. This protein is also overexpressed in type 2 diabetes mellitus, where it may contribute to insulin resistance in glucose uptake. Alternative splicing results in multiple transcript variants; Phosphoprotein enriched i…
UC001FBW.1	S100A6	The protein encoded by this gene is a member of the S100 family of proteins containing 2 EF-hand calcium-binding motifs. S100 proteins are localized in the cytoplasm and/or nucleus of a wide range of cells, and involved in the regulation of a number of cellular processes such as cell cycle progression and differentiation. S100 genes include at least 13 members which are located as a cluster on ch…
UC001FBQ.2	S100A9	S100A9 is a calcium- and zinc-binding protein which plays a prominent role in the regulation of inflammatory processes and immune response. It can induce neutrophil chemotaxis, adhesion, can increase the bactericidal activity of neutrophils by promoting phagocytosis via activation of SYK, PI3K/AKT, and ERK1/2 and can induce degranulation of neutrophils by a MAPK-dependent mechanism. Predominantly…
UC003HQS.3, UC003LUI.2	SPARCL1	SPARCL1 (SPARC-Like 1 (Hevin)) is a Protein Coding gene. GO annotations related to this gene include calcium ion binding.
UC004COV.3	STRF6	Homo sapiens potential LAG1 (sphingosine N-acyltransferase) interactor mRNA, partial cds.
UC003YTW.2, UC010MDW.2, UC011LJB.1, UC011LJC.1	TG	Thyroglobulin (Tg) is a glycoprotein homodimer produced predominantly by the thryroid gland. It acts as a substrate for the synthesis of thyroxine and triiodothyronine as well as the storage of the inactive forms of thyroid hormone and iodine. Thyroglobulin is secreted from the endoplasmic reticulum to its site of iodination, and subsequent thyroxine biosynthesis, in the follicular lumen. Mutatio…
UC001UZY.1	TPT1	TPT1 (Tumor Protein, Translationally-Controlled 1) is a Protein Coding gene. Diseases associated with TPT1 include posterior myocardial infarction and eumycotic mycetoma. Among its related pathways are Cytoskeletal Signaling and DNA Damage. GO annotations related to this gene include poly(A) RNA binding and transcription factor binding.
UC004COS.3	TVAS5	Homo sapiens mRNA expressed only in placental villi, clone SMAP47.
UC001AAZ.2	MT-CO1_Pseudo	MT-CO1 (Mitchondrial cytochrome c oxidase) pseudogene 12
