# Supplementary material for: Sorting Five Human Tumor Types Reveals Specific Biomarkers and Background Classification Genes
Source: Sci Rep. 2018 May 25;8:8180. doi: 10.1038/s41598-018-26310-x (PMC5970138; doi:10.1038/s41598-018-26310-x)
Supplement: Supplementary file 4 — Supplemental Table 2 [file 41598_2018_26310_MOESM4_ESM.xlsx]

## Sheet: Supplemental Table 2
Sorting Five Human Tumor Types Reveals Specific Biomarkers and Background Classification Genes
Kimberly E. Roche, Marvin Weinstein, Leland Dunwoodie, William L. Poehlman, and Frank A. Feltus
Supplemental Table 2. Functional Profiling at Each Feature Removal Iteration.
Module	Iteration	GeneCount	Fishers pVal	bonferroni	benjamini	fdr	efold	Type	Term	definition
1_48	1	48	0.000973367	0.138218	0.00118135	0.00531608	3.68307	Reactome	R-HSA-1474244	Extracellular matrix organization
1_48	1	48	0.000799528	0.113533	0.00102282	0.0035479	17.6948	Reactome	R-HSA-372708	p130Cas linkage to MAPK signaling for integrins
1_48	1	48	0.000695872	0.0988138	0.000906549	0.00290629	5.85582	Reactome	R-HSA-202733	Cell surface interactions at the vascular wall
1_48	1	48	0.000519048	0.0737048	0.00077584	0.00153552	7.93333	Reactome	R-HSA-6802952	Signaling by BRAF and RAF fusions
1_48	1	48	0.000472777	0.0671343	0.000714195	0.00137009	21.42	Reactome	R-HSA-354194	GRB2:SOS provides linkage to MAPK signaling for Integrins
1_48	1	48	0.000142782	0.020275	0.000302612	0.000266776	10.5984	Reactome	R-HSA-6802949	Signaling by RAS mutants
1_48	1	48	0.000120123	0.0170575	0.000262423	0.000218686	35.3895	Reactome	R-HSA-1566977	Fibronectin matrix formation
1_48	1	48	6.59187e-05	0.00936046	0.00015345	0.000114152	9.19728	Reactome	R-HSA-216083	Integrin cell surface interactions
1_48	1	48	4.666e-05	0.00662572	0.000118317	7.61578e-05	13.566	Reactome	R-HSA-5674135	MAP2K and MAPK activation
1_48	1	48	4.52664e-05	0.00642782	0.00011687	7.30434e-05	9.86617	Reactome	R-HSA-3000171	Non-integrin membrane-ECM interactions
1_48	1	48	4.4572e-05	0.00632922	0.000117208	7.11148e-05	13.703	Reactome	R-HSA-6802955	Paradoxical activation of RAF signaling by kinase inactive BRAF
1_48	1	48	4.4572e-05	0.00632922	0.000119419	7.03246e-05	13.703	Reactome	R-HSA-6802946	Signaling by moderate kinase activity BRAF mutants
1_48	1	48	4.0613e-05	0.00576704	0.000110905	6.33741e-05	13.9856	Reactome	R-HSA-76009	Platelet Aggregation (Plug Formation)
1_48	1	48	3.13119e-05	0.0044463	9.66586e-05	4.58381e-05	6.86885	Reactome	R-HSA-1474228	Degradation of the extracellular matrix
1_48	1	48	3.03469e-05	0.00430927	9.57615e-05	4.39721e-05	14.9077	Reactome	R-HSA-6802948	Signaling by high-kinase activity BRAF mutants
1_48	1	48	1.97767e-05	0.00280829	6.84949e-05	2.75323e-05	27.8277	Reactome	R-HSA-3000480	Scavenging by Class A Receptors
1_48	1	48	5.2611e-07	7.47076e-05	5.74674e-06	5.74674e-07	22.3003	Reactome	R-HSA-8874081	MET activates PTK2 signaling
1_48	1	48	1.79043e-07	2.54241e-05	3.17802e-06	1.88327e-07	27.132	Reactome	R-HSA-3000170	Syndecan interactions
1_48	1	48	1.27159e-07	1.80565e-05	2.57951e-06	1.32769e-07	14.8668	Reactome	R-HSA-3000178	ECM proteoglycans
10_87	10	87	0.000937339	0.371186	0.00458254	0.00117464	56.5705	Reactome	R-HSA-5250958	Toxicity of botulinum toxin type B (BoNT/B)
11_41	11	41	0.00044336	0.0749278	0.00681161	0.000471244	5.27632	Reactome	R-HSA-1474244	Extracellular matrix organization
11_41	11	41	0.000250331	0.0423059	0.00528824	0.000261147	13.6916	Reactome	R-HSA-3000178	ECM proteoglycans
12_34	12	34	0.00034803	0.0431557	0.00479508	0.000372032	22.9465	Reactome	R-HSA-445355	Smooth Muscle Contraction
13_413	13	413	0.00068473	0.483419	0.00508863	0.000789901	4.44642	Reactome	R-HSA-72695	Formation of the ternary complex, and subsequently, the 43S complex
13_413	13	413	0.000324348	0.22899	0.00309446	0.000361753	3.08367	Reactome	R-HSA-975957	Nonsense Mediated Decay (NMD) enhanced by the Exon Junction Complex (EJC)
13_413	13	413	0.000221225	0.156185	0.00229683	0.00024442	3.39088	Reactome	R-HSA-975956	Nonsense Mediated Decay (NMD) independent of the Exon Junction Complex (EJC)
13_413	13	413	0.000217398	0.153483	0.00229079	0.000239817	3.21464	Reactome	R-HSA-72706	GTP hydrolysis and joining of the 60S ribosomal subunit
13_413	13	413	0.000194141	0.137064	0.00210867	0.000213495	3.25231	Reactome	R-HSA-156827	L13a-mediated translational silencing of Ceruloplasmin expression
13_413	13	413	0.000149413	0.105486	0.00170138	0.000163544	18.2987	Reactome	R-HSA-5661231	Metallothioneins bind metals
13_413	13	413	0.000134079	0.0946596	0.00163206	0.000145855	3.57926	Reactome	R-HSA-72764	Eukaryotic Translation Termination
13_413	13	413	0.00011763	0.0830469	0.00145696	0.000127764	3.62968	Reactome	R-HSA-2408557	Selenocysteine synthesis
13_413	13	413	9.40692e-05	0.0664128	0.00122987	0.000101704	3.71693	Reactome	R-HSA-192823	Viral mRNA Translation
13_413	13	413	8.8115e-05	0.0622092	0.00117376	9.5121e-05	12.9284	Reactome	R-HSA-209968	Thyroxine biosynthesis
13_413	13	413	7.33207e-05	0.0517644	0.00101499	7.89091e-05	3.58876	Reactome	R-HSA-156842	Eukaryotic Translation Elongation
13_413	13	413	7.33207e-05	0.0517644	0.00103529	7.8789e-05	3.58876	Reactome	R-HSA-72689	Formation of a pool of free 40S subunits
13_413	13	413	2.86104e-05	0.020199	0.00065158	2.98801e-05	7.31949	Reactome	R-HSA-5626467	RHO GTPases activate IQGAPs
13_413	13	413	2.52848e-05	0.017851	0.000686579	2.6213e-05	3.98369	Reactome	R-HSA-156902	Peptide chain elongation
13_413	13	413	2.98371e-06	0.0021065	0.0001915	3.02658e-06	4.04402	Reactome	R-HSA-1799339	SRP-dependent cotranslational protein targeting to membrane
14_280	14	280	0.000923151	0.493886	0.00866466	0.00103108	2.11107	Reactome	R-HSA-6798695	Neutrophil degranulation
14_280	14	280	0.000401406	0.214752	0.006711	0.000426095	5.50086	Reactome	R-HSA-3000178	ECM proteoglycans
14_280	14	280	0.000395568	0.211629	0.00682674	0.000419067	12.748	Reactome	R-HSA-140837	Intrinsic Pathway of Fibrin Clot Formation
15_209	15	209	0.000380356	0.197785	0.00565101	0.000406965	8.79193	Reactome	R-HSA-212676	Dopamine Neurotransmitter Release Cycle
15_209	15	209	0.000208397	0.108366	0.00433466	0.000218481	32.8232	Reactome	R-HSA-5250968	Toxicity of botulinum toxin type A (BoNT/A)
15_209	15	209	0.000163145	0.0848357	0.00424178	0.000169333	10.7032	Reactome	R-HSA-181429	Serotonin Neurotransmitter Release Cycle
15_209	15	209	0.000157478	0.0818884	0.00430991	0.000163124	36.9261	Reactome	R-HSA-5250992	Toxicity of botulinum toxin type E (BoNT/E)
16_119	16	119	0.000792389	0.190966	0.00578684	0.000913711	55.1035	Reactome	R-HSA-8857538	PTK6 promotes HIF1A stabilization
16_119	16	119	0.000132301	0.0318847	0.00245267	0.000139234	4.86207	Reactome	R-HSA-1474244	Extracellular matrix organization
18_2101	18	2101	0.000874852	0.927343	0.0111728	0.000948203	2.0513	Reactome	R-HSA-4086400	PCP/CE pathway
18_2101	18	2101	0.000618259	0.655354	0.00897746	0.000663314	2.43354	Reactome	R-HSA-72662	Activation of the mRNA upon binding of the cap-binding complex and eIFs, and subsequent binding to 43S
18_2101	18	2101	0.000566391	0.600374	0.00896081	0.000603998	2.4527	Reactome	R-HSA-72649	Translation initiation complex formation
18_2101	18	2101	0.000544594	0.577269	0.00901983	0.000579006	2.19981	Reactome	R-HSA-216083	Integrin cell surface interactions
18_2101	18	2101	0.000518331	0.549431	0.00900707	0.000549431	2.47217	Reactome	R-HSA-381070	IRE1alpha activates chaperones
18_2101	18	2101	0.000394715	0.418398	0.00789431	0.000415078	2.53246	Reactome	R-HSA-381038	XBP1(S) activates chaperone genes
18_2101	18	2101	0.000282664	0.299624	0.00713391	0.000294037	2.53541	Reactome	R-HSA-72702	Ribosomal scanning and start codon recognition
18_2101	18	2101	0.000147662	0.156521	0.00447204	0.000152555	2.75658	Reactome	R-HSA-350562	Regulation of ornithine decarboxylase (ODC)
18_2101	18	2101	0.000121989	0.129308	0.00404088	0.000125664	1.64438	Reactome	R-HSA-1474244	Extracellular matrix organization
2_57	2	57	0.000839449	0.151101	0.00290579	0.00117132	53.1239	Reactome	R-HSA-210455	Astrocytic Glutamate-Glutamine Uptake And Metabolism
2_57	2	57	0.000468718	0.0843692	0.00196208	0.000611371	11.6209	Reactome	R-HSA-72662	Activation of the mRNA upon binding of the cap-binding complex and eIFs, and subsequent binding to 43S
2_57	2	57	0.00045547	0.0819846	0.00195201	0.000589817	11.7124	Reactome	R-HSA-72649	Translation initiation complex formation
2_57	2	57	0.000296802	0.0534244	0.0014439	0.000371003	13.1635	Reactome	R-HSA-983170	Antigen Presentation: Folding, assembly and peptide loading of class I MHC
2_57	2	57	6.63398e-05	0.0119412	0.000373161	8.0142e-05	42.9078	Reactome	R-HSA-381033	ATF6 (ATF6-alpha) activates chaperones
2_57	2	57	6.13155e-05	0.0110368	0.000367893	7.30913e-05	7.37415	Reactome	R-HSA-6791226	Major pathway of rRNA processing in the nucleolus and cytosol
2_57	2	57	5.33162e-05	0.00959692	0.000330928	6.31377e-05	46.4835	Reactome	R-HSA-381183	ATF6 (ATF6-alpha) activates chaperone genes
2_57	2	57	8.94462e-06	0.00161003	8.94461e-05	9.87749e-06	10.0505	Reactome	R-HSA-72706	GTP hydrolysis and joining of the 60S ribosomal subunit
2_57	2	57	7.15522e-06	0.00128794	8.04962e-05	7.8057e-06	10.4123	Reactome	R-HSA-1799339	SRP-dependent cotranslational protein targeting to membrane
2_57	2	57	5.77519e-06	0.00103953	6.93023e-05	6.26226e-06	38.1403	Reactome	R-HSA-3000480	Scavenging by Class A Receptors
2_57	2	57	4.45665e-06	0.000802197	5.72998e-05	4.80357e-06	11.2201	Reactome	R-HSA-72689	Formation of a pool of free 40S subunits
2_57	2	57	2.82777e-06	0.000508999	3.91538e-05	3.02976e-06	12.0513	Reactome	R-HSA-72764	Eukaryotic Translation Termination
2_57	2	57	2.5863e-06	0.000465533	3.87944e-05	2.75463e-06	12.221	Reactome	R-HSA-2408557	Selenocysteine synthesis
2_57	2	57	2.22213e-06	0.000399983	3.63621e-05	2.35284e-06	12.5148	Reactome	R-HSA-192823	Viral mRNA Translation
2_57	2	57	1.05167e-06	0.000189301	2.10334e-05	1.10059e-06	11.0183	Reactome	R-HSA-975957	Nonsense Mediated Decay (NMD) enhanced by the Exon Junction Complex (EJC)
2_57	2	57	7.14616e-07	0.000128631	1.83758e-05	7.39258e-07	11.6209	Reactome	R-HSA-156827	L13a-mediated translational silencing of Ceruloplasmin expression
2_57	2	57	3.48646e-07	6.27563e-05	1.25513e-05	3.5657e-07	12.823	Reactome	R-HSA-156842	Eukaryotic Translation Elongation
2_57	2	57	3.07002e-07	5.52603e-05	1.38151e-05	3.12205e-07	13.048	Reactome	R-HSA-975956	Nonsense Mediated Decay (NMD) independent of the Exon Junction Complex (EJC)
2_57	2	57	1.62197e-07	2.91954e-05	9.73181e-06	1.64019e-07	14.2342	Reactome	R-HSA-156902	Peptide chain elongation
3_55	3	55	0.000991049	0.315153	0.00534158	0.00121213	4.6344	Reactome	R-HSA-6791226	Major pathway of rRNA processing in the nucleolus and cytosol
3_55	3	55	0.000586925	0.186642	0.00352155	0.000701662	5.08057	Reactome	R-HSA-76005	Response to elevated platelet cytosolic Ca2+
3_55	3	55	0.000572629	0.182096	0.00350185	0.000682008	11.1289	Reactome	R-HSA-5627123	RHO GTPases activate PAKs
3_55	3	55	0.00051712	0.164444	0.003356	0.000609053	5.19347	Reactome	R-HSA-114608	Platelet degranulation
3_55	3	55	0.000282958	0.0899806	0.0021424	0.00032484	9.12914	Reactome	R-HSA-72662	Activation of the mRNA upon binding of the cap-binding complex and eIFs, and subsequent binding to 43S
3_55	3	55	0.00027327	0.0868998	0.00217249	0.000311469	9.20103	Reactome	R-HSA-72649	Translation initiation complex formation
3_55	3	55	0.000164021	0.0521588	0.00149025	0.000183658	6.31638	Reactome	R-HSA-72706	GTP hydrolysis and joining of the 60S ribosomal subunit
3_55	3	55	0.000132813	0.0422347	0.0012422	0.000148192	6.54377	Reactome	R-HSA-1799339	SRP-dependent cotranslational protein targeting to membrane
3_55	3	55	8.47624e-05	0.0269544	0.000842326	9.39179e-05	7.05148	Reactome	R-HSA-156842	Eukaryotic Translation Elongation
3_55	3	55	8.47624e-05	0.0269544	0.000869498	9.35918e-05	7.05148	Reactome	R-HSA-72689	Formation of a pool of free 40S subunits
3_55	3	55	5.49614e-05	0.0174777	0.000624204	6.00609e-05	7.57381	Reactome	R-HSA-72764	Eukaryotic Translation Termination
3_55	3	55	5.0473e-05	0.0160504	0.00059446	5.49672e-05	7.68048	Reactome	R-HSA-2408557	Selenocysteine synthesis
3_55	3	55	4.49596e-05	0.0142971	0.00054989	4.87957e-05	7.82748	Reactome	R-HSA-156902	Peptide chain elongation
3_55	3	55	4.36614e-05	0.0138843	0.000555373	4.72256e-05	7.86511	Reactome	R-HSA-192823	Viral mRNA Translation
3_55	3	55	3.02105e-05	0.00960693	0.000457473	3.2238e-05	6.92463	Reactome	R-HSA-975957	Nonsense Mediated Decay (NMD) enhanced by the Exon Junction Complex (EJC)
3_55	3	55	2.09284e-05	0.00665522	0.000391484	2.20372e-05	7.30332	Reactome	R-HSA-156827	L13a-mediated translational silencing of Ceruloplasmin expression
3_55	3	55	9.34555e-06	0.00297189	0.000270171	9.64898e-06	8.20021	Reactome	R-HSA-975956	Nonsense Mediated Decay (NMD) independent of the Exon Junction Complex (EJC)
4_22	4	22	0.000652803	0.0744196	0.00169135	0.00104816	57.8915	Reactome	R-HSA-430116	GP1b-IX-V activation signalling
4_22	4	22	0.000183691	0.0209408	0.000698027	0.000246362	9.83991	Reactome	R-HSA-6791226	Major pathway of rRNA processing in the nucleolus and cytosol
4_22	4	22	5.36157e-05	0.00611219	0.000277827	6.57224e-05	12.8648	Reactome	R-HSA-975957	Nonsense Mediated Decay (NMD) enhanced by the Exon Junction Complex (EJC)
4_22	4	22	4.42089e-05	0.00503982	0.000251991	5.30507e-05	13.4112	Reactome	R-HSA-72706	GTP hydrolysis and joining of the 60S ribosomal subunit
4_22	4	22	4.18803e-05	0.00477435	0.000251282	4.97328e-05	13.5683	Reactome	R-HSA-156827	L13a-mediated translational silencing of Ceruloplasmin expression
4_22	4	22	3.75084e-05	0.00427595	0.000237553	4.4082e-05	13.894	Reactome	R-HSA-1799339	SRP-dependent cotranslational protein targeting to membrane
4_22	4	22	2.64796e-05	0.00301867	0.000188667	3.04916e-05	14.9719	Reactome	R-HSA-156842	Eukaryotic Translation Elongation
4_22	4	22	2.64796e-05	0.00301867	0.000201245	3.01867e-05	14.9719	Reactome	R-HSA-72689	Formation of a pool of free 40S subunits
4_22	4	22	2.44142e-05	0.00278322	0.000198801	2.75566e-05	15.2346	Reactome	R-HSA-975956	Nonsense Mediated Decay (NMD) independent of the Exon Junction Complex (EJC)
4_22	4	22	1.89599e-05	0.00216143	0.000166264	2.11905e-05	16.081	Reactome	R-HSA-72764	Eukaryotic Translation Termination
4_22	4	22	1.7758e-05	0.00202441	0.000168701	1.96544e-05	16.3075	Reactome	R-HSA-2408557	Selenocysteine synthesis
4_22	4	22	1.62486e-05	0.00185234	0.000168394	1.78109e-05	16.6196	Reactome	R-HSA-156902	Peptide chain elongation
4_22	4	22	1.58873e-05	0.00181116	0.000181116	1.72491e-05	16.6995	Reactome	R-HSA-192823	Viral mRNA Translation
5_22	5	22	0.000414314	0.0530322	0.00353548	0.000465195	73.2108	Reactome	R-HSA-432047	Passive transport by Aquaporins
6_73	6	73	2.35068e-09	3.94915e-07	1.97458e-08	2.65044e-09	10.9645	Reactome	R-HSA-6791226	Major pathway of rRNA processing in the nucleolus and cytosol
6_73	6	73	1.26622e-10	2.12725e-08	1.25132e-09	1.3995e-10	14.335	Reactome	R-HSA-975957	Nonsense Mediated Decay (NMD) enhanced by the Exon Junction Complex (EJC)
6_73	6	73	8.0187e-11	1.34714e-08	8.41963e-10	8.80484e-11	14.9439	Reactome	R-HSA-72706	GTP hydrolysis and joining of the 60S ribosomal subunit
6_73	6	73	7.05457e-11	1.18517e-08	7.90112e-10	7.6959e-11	15.119	Reactome	R-HSA-156827	L13a-mediated translational silencing of Ceruloplasmin expression
6_73	6	73	5.43432e-11	9.12966e-09	6.52119e-10	5.8901e-11	15.4818	Reactome	R-HSA-1799339	SRP-dependent cotranslational protein targeting to membrane
6_73	6	73	2.38498e-11	4.00676e-09	3.08212e-10	2.56844e-11	16.683	Reactome	R-HSA-156842	Eukaryotic Translation Elongation
6_73	6	73	2.38498e-11	4.00676e-09	3.33897e-10	2.55208e-11	16.683	Reactome	R-HSA-72689	Formation of a pool of free 40S subunits
6_73	6	73	1.96843e-11	3.30696e-09	3.00633e-10	2.09301e-11	16.9757	Reactome	R-HSA-975956	Nonsense Mediated Decay (NMD) independent of the Exon Junction Complex (EJC)
6_73	6	73	1.08319e-11	1.81977e-09	2.02196e-10	1.13735e-11	17.9188	Reactome	R-HSA-72764	Eukaryotic Translation Termination
6_73	6	73	9.27992e-12	1.55903e-09	1.94878e-10	9.6834e-12	18.1712	Reactome	R-HSA-2408557	Selenocysteine synthesis
6_73	6	73	7.52445e-12	1.26411e-09	1.80587e-10	7.80314e-12	18.5189	Reactome	R-HSA-156902	Peptide chain elongation
6_73	6	73	7.13558e-12	1.19878e-09	1.99796e-10	7.35446e-12	18.608	Reactome	R-HSA-192823	Viral mRNA Translation
7_55	7	55	0.00072847	0.23821	0.0108277	0.000778463	7.34899	Reactome	R-HSA-216083	Integrin cell surface interactions
7_55	7	55	0.000279287	0.0913268	0.00537216	0.000293655	5.76291	Reactome	R-HSA-1474228	Degradation of the extracellular matrix
9_146	9	146	0.000917067	0.324642	0.00515304	0.00111179	9.90482	Reactome	R-HSA-3000170	Syndecan interactions
9_146	9	146	0.000317488	0.112391	0.00239129	0.000364905	6.91034	Reactome	R-HSA-72702	Ribosomal scanning and start codon recognition
9_146	9	146	0.000264729	0.093714	0.00208253	0.000302303	5.87574	Reactome	R-HSA-216083	Integrin cell surface interactions
9_146	9	146	0.000238139	0.0843013	0.00200717	0.000269333	3.13727	Reactome	R-HSA-1474244	Extracellular matrix organization
9_146	9	146	0.000175416	0.0620971	0.00155243	0.000197134	6.30307	Reactome	R-HSA-3000171	Non-integrin membrane-ECM interactions
9_146	9	146	0.000120855	0.0427825	0.00115628	0.000134536	8.33116	Reactome	R-HSA-72695	Formation of the ternary complex, and subsequently, the 43S complex
9_146	9	146	0.000111571	0.0394962	0.00112846	0.000123426	11.4286	Reactome	R-HSA-5626467	RHO GTPases activate IQGAPs
9_146	9	146	3.8457e-05	0.0136138	0.000412539	4.22788e-05	8.12505	Reactome	R-HSA-72662	Activation of the mRNA upon binding of the cap-binding complex and eIFs, and subsequent binding to 43S
9_146	9	146	3.66732e-05	0.0129823	0.000405698	4.0193e-05	8.18902	Reactome	R-HSA-72649	Translation initiation complex formation
9_146	9	146	1.06867e-05	0.00378307	0.000130451	1.16045e-05	8.14095	Reactome	R-HSA-3000178	ECM proteoglycans
9_146	9	146	2.63924e-07	9.3429e-05	4.24677e-06	2.80567e-07	5.89238	Reactome	R-HSA-6791226	Major pathway of rRNA processing in the nucleolus and cytosol
9_146	9	146	6.82005e-09	2.4143e-06	1.34128e-07	7.16409e-09	8.03093	Reactome	R-HSA-72706	GTP hydrolysis and joining of the 60S ribosomal subunit
9_146	9	146	4.45434e-09	1.57684e-06	9.2755e-08	4.66519e-09	8.32005	Reactome	R-HSA-1799339	SRP-dependent cotranslational protein targeting to membrane
9_146	9	146	1.80273e-09	6.38165e-07	3.98853e-08	1.88249e-09	8.96557	Reactome	R-HSA-72689	Formation of a pool of free 40S subunits
9_146	9	146	1.39495e-09	4.93814e-07	3.29209e-08	1.45239e-09	8.25401	Reactome	R-HSA-975957	Nonsense Mediated Decay (NMD) enhanced by the Exon Junction Complex (EJC)
9_146	9	146	7.55051e-10	2.67288e-07	1.9092e-08	7.83836e-10	9.62968	Reactome	R-HSA-72764	Eukaryotic Translation Termination
9_146	9	146	7.00211e-10	2.47875e-07	1.90673e-08	7.2478e-10	8.70541	Reactome	R-HSA-156827	L13a-mediated translational silencing of Ceruloplasmin expression
9_146	9	146	6.36455e-10	2.25305e-07	1.87754e-08	6.56866e-10	9.76531	Reactome	R-HSA-2408557	Selenocysteine synthesis
9_146	9	146	4.75957e-10	1.68489e-07	1.68489e-08	4.88374e-10	10.0001	Reactome	R-HSA-192823	Viral mRNA Translation
9_146	9	146	1.94196e-10	6.87454e-08	7.63838e-09	1.98686e-10	9.60597	Reactome	R-HSA-156842	Eukaryotic Translation Elongation
9_146	9	146	1.54668e-10	5.47524e-08	6.84405e-09	1.57788e-10	9.77449	Reactome	R-HSA-975956	Nonsense Mediated Decay (NMD) independent of the Exon Junction Complex (EJC)
9_146	9	146	4.93376e-11	1.74655e-08	2.91092e-09	5.00444e-11	10.6631	Reactome	R-HSA-156902	Peptide chain elongation
1_48	1	48	3.596e-05	0.001798	3.74583e-05	0.000599333	268.382	Pfam	PF09289	Follistatin/Osteonectin-like EGF domain
1_48	1	48	5.46697e-06	0.000273348	8.81769e-06	1.36674e-05	894.608	Pfam	PF00361	Proton-conducting membrane transporter
1_48	1	48	5.14821e-06	0.000257411	8.58035e-06	1.22576e-05	98.1886	Pfam	PF01410	Fibrillar collagen C-terminal domain
1_48	1	48	4.15044e-06	0.000207522	7.68599e-06	8.64674e-06	105.94	Pfam	PF00040	Fibronectin type II domain
1_48	1	48	9.03225e-07	4.51612e-05	2.82258e-06	1.29032e-06	182.988	Pfam	PF00039	Fibronectin type I domain
1_48	1	48	2.22376e-07	1.11188e-05	1.23542e-06	2.64733e-07	39.9378	Pfam	PF00038	Intermediate filament protein
1_48	1	48	0.000855107	0.0427554	0.000378366	0	16.5668	Pfam	PF01391	Collagen triple helix repeat (20 copies)
1_48	1	48	0.000843812	0.0421906	0.000376702	0	9.65404	Pfam	PF07654	Immunoglobulin C1-set domain
1_48	1	48	0.000708638	0.0354319	0.000322108	0	53.6765	Pfam	PF00086	Thyroglobulin type-1 repeat
1_48	1	48	0.000579102	0.0289551	0.000292476	0	59.6405	Pfam	PF16208	Keratin type II head
1_48	1	48	0.000378244	0.0189122	0.000214911	0	74.5506	Pfam	PF03144	Elongation factor Tu domain 2
1_48	1	48	0.000302426	0.0151213	0.000177898	0	83.8695	Pfam	PF00050	Kazal-type serine protease inhibitor domain
1_48	1	48	0.000267644	0.0133822	0.000169395	0	89.4608	Pfam	PF10591	Secreted protein acidic and rich in cysteine Ca binding region
10_87	10	87	0.000592717	0.0681624	0.00106504	0.00131082	10.7418	Pfam	PF00010	Helix-loop-helix DNA-binding domain
10_87	10	87	0.000500715	0.0575822	0.000992797	0.000992797	66.319	Pfam	PF00681	Plectin repeat
10_87	10	87	0.000461053	0.0530211	0.000964021	0.000869199	69.3336	Pfam	PF07527	Hairy Orange
10_87	10	87	0.000318484	0.0366257	0.000747463	0.000546652	84.741	Pfam	PF00224	Pyruvate kinase, barrel domain
10_87	10	87	0.000176763	0.0203277	0.000508192	0.00026747	117.334	Pfam	PF02887	Pyruvate kinase, alpha/beta domain
10_87	10	87	7.85226e-05	0.0090301	0.000301003	0.000105001	38.7798	Pfam	PF00014	Kunitz/Bovine pancreatic trypsin inhibitor domain
10_87	10	87	7.60818e-05	0.00874941	0.000301704	0.000100568	190.667	Pfam	PF03494	Beta-amyloid peptide (beta-APP)
10_87	10	87	4.94783e-06	0.000569	4.06429e-05	5.57843e-06	104	Pfam	PF02177	Amyloid A4 N-terminal heparin-binding
10_87	10	87	4.35827e-06	0.000501201	4.17668e-05	4.81924e-06	108.953	Pfam	PF12925	E2 domain of amyloid precursor protein
10_87	10	87	2.87215e-06	0.000330297	4.12871e-05	3.0583e-06	127.112	Pfam	PF12924	Copper-binding of amyloid precursor, CuBD
10_87	10	87	2.4642e-06	0.000283384	7.08459e-05	2.53021e-06	134.589	Pfam	PF10515	beta-amyloid precursor protein C-terminus
11_41	11	41	0.000855107	0.0632779	0.00421853	0.00105463	16.5668	Pfam	PF01391	Collagen triple helix repeat (20 copies)
12_34	12	34	0.000394099	0.0177345	0.00177345	0.000492624	21.4887	Pfam	PF00307	Calponin homology (CH) domain
12_34	12	34	0.000222452	0.0100103	0.00200207	0.000244155	96.3736	Pfam	PF00261	Tropomyosin
13_413	13	413	0.000996844	0.45157	0.00418121	0.00130512	16.7686	Pfam	PF00255	Glutathione peroxidase
13_413	13	413	0.000704987	0.319359	0.00329236	0.000894563	10.6293	Pfam	PF12662	Complement Clr-like EGF-like
13_413	13	413	0.000664805	0.301157	0.00320379	0.000836546	10.8064	Pfam	PF01023	S-100/ICaBP type calcium binding domain
13_413	13	413	0.000553929	0.25093	0.00288425	0.000683732	81.0482	Pfam	PF03957	Jun-like transcription factor
13_413	13	413	0.000370795	0.16797	0.00209962	0.000449118	108.064	Pfam	PF11936	Domain of unknown function (DUF3454)
13_413	13	413	8.68836e-05	0.0393583	0.00075689	9.79061e-05	5.21024	Pfam	PF07645	Calcium-binding EGF domain
13_413	13	413	3.863e-05	0.0174994	0.000514688	4.16652e-05	24.0143	Pfam	PF00131	Metallothionein
13_413	13	413	1.63951e-05	0.007427	0.000337591	1.71921e-05	6.5128	Pfam	PF00008	EGF-like domain
13_413	13	413	4.70227e-06	0.00213013	0.000152152	4.8412e-06	23.1566	Pfam	PF03098	Animal haem peroxidase
14_280	14	280	0.000970966	0.32139	0.00544728	0.00117725	51.213	Pfam	PF09289	Follistatin/Osteonectin-like EGF domain
14_280	14	280	0.000966698	0.319977	0.00551684	0.0011678	5.48711	Pfam	PF07645	Calcium-binding EGF domain
14_280	14	280	0.000292357	0.0967702	0.00358408	0.000317279	25.6065	Pfam	PF10591	Secreted protein acidic and rich in cysteine Ca binding region
14_280	14	280	0.0001884	0.0623604	0.00283457	0.000201163	15.0627	Pfam	PF00093	von Willebrand factor type C domain
14_280	14	280	0.000126671	0.0419282	0.00232934	0.000133529	16.7912	Pfam	PF00118	TCP-1/cpn60 chaperonin family
15_209	15	209	0.000685524	0.182349	0.00364699	0.000840319	61.1014	Pfam	PF08976	EF-hand domain
15_209	15	209	0.000572505	0.152286	0.00338414	0.000685974	67.8905	Pfam	PF01271	Granin (chromogranin or secretogranin)
15_209	15	209	0.000469426	0.124867	0.00312168	0.000550076	76.3768	Pfam	PF02750	Synapsin, ATP binding domain
15_209	15	209	0.000469426	0.124867	0.00320173	0.000547664	76.3768	Pfam	PF13599	Pentapeptide repeats (9 copies)
15_209	15	209	0.000376353	0.10011	0.00294441	0.000429656	87.2878	Pfam	PF02078	Synapsin, N-terminal domain
15_209	15	209	0.000376353	0.10011	0.00303363	0.00042782	87.2878	Pfam	PF10581	Synapsin N-terminal
16_119	16	119	0.000829752	0.126952	0.00352645	0.00107587	51.5367	Pfam	PF07965	Integrin beta tail domain
16_119	16	119	0.000696078	0.1065	0.00409615	0.00083203	56.6904	Pfam	PF08725	Integrin beta cytoplasmic domain
16_119	16	119	0.00052241	0.0799287	0.00363312	0.00060552	6.11767	Pfam	PF07654	Immunoglobulin C1-set domain
16_119	16	119	0.000463181	0.0708667	0.00372983	0.000524939	70.863	Pfam	PF08246	Cathepsin propeptide inhibitor domain (I29)
16_119	16	119	8.57545e-05	0.0131204	0.00187435	8.92547e-05	188.968	Pfam	PF02218	Repeat in HS1/Cortactin
18_2101	18	2101	0.000713962	1	0.0137099	0.000752662	25.9238	Pfam	PF13704	Glycosyl transferase family 2
18_2101	18	2101	0.000713962	1	0.0138856	0.000752139	25.9238	Pfam	PF11261	Interferon regulatory factor 2-binding protein zinc finger
18_2101	18	2101	0.000384959	0.583983	0.0112304	0.000398351	2.03723	Pfam	PF07679	Immunoglobulin I-set domain
18_2101	18	2101	0.000168855	0.256153	0.00692305	0.000172959	2.21469	Pfam	PF13927	Immunoglobulin domain
18_2101	18	2101	0.000133877	0.203091	0.00597326	0.000136854	9.01697	Pfam	PF00681	Plectin repeat
2_57	2	57	1.66678e-05	0.00138342	6.01489e-05	2.26791e-05	27.4356	Pfam	PF00038	Intermediate filament protein
3_55	3	55	0.000457626	0.0292881	0.000610168	0.00172283	67.3086	Pfam	PF01576	Myosin tail
3_55	3	55	0.000378016	0.024193	0.000549841	0.00115205	74.3937	Pfam	PF02736	Myosin N-terminal SH3-like domain
3_55	3	55	0.000255134	0.0163286	0.000418681	0.000628021	25.2407	Pfam	PF00038	Intermediate filament protein
3_55	3	55	4.34313e-05	0.0027796	0.000115817	6.77952e-05	46.5982	Pfam	PF00022	Actin
3_55	3	55	1.3071e-05	0.000836541	6.43493e-05	1.60873e-05	70.674	Pfam	PF01023	S-100/ICaBP type calcium binding domain
4_22	4	22	7.09719e-05	0.00191624	8.33149e-05	0.000383248	170.026	Pfam	PF00244	14-3-3 protein
5_22	5	22	0.000697679	0.0244188	0.0012852	0.0014364	2865.16	Pfam	PF14204	Ribosomal L18 C-terminal region
5_22	5	22	9.62923e-05	0.00337023	0.00168511	9.91244e-05	146.931	Pfam	PF00230	Major intrinsic protein
6_73	6	73	0.000883805	0.0936833	0.00173488	0.00176761	48.5176	Pfam	PF00040	Fibronectin type II domain
6_73	6	73	0.000715867	0.0758819	0.00148788	0.00135503	54.2256	Pfam	PF01034	Syndecan domain
6_73	6	73	0.000431961	0.0457879	0.00101751	0.000738514	70.9104	Pfam	PF04089	BRICHOS domain
6_73	6	73	0.000316296	0.0335273	0.000838184	0.000500408	83.8032	Pfam	PF00039	Fibronectin type I domain
6_73	6	73	0.000105028	0.011133	0.000327441	0.000152507	153.639	Pfam	PF00428	60s Acidic ribosomal protein
7_55	7	55	2.90337e-05	0.00200332	0.000200332	3.33887e-05	23.5816	Pfam	PF01391	Collagen triple helix repeat (20 copies)
7_55	7	55	4.79359e-06	0.000330758	4.72511e-05	5.25012e-06	955.054	Pfam	PF03821	Golgi 4-transmembrane spanning transporter
8_23	8	23	0.000810747	0.0299976	0.00111102	0.00272706	2465.37	Pfam	PF03508	Gap junction alpha-1 protein (Cx43)
8_23	8	23	0.000157214	0.00581693	0.000447456	0.000232677	114.668	Pfam	PF00219	Insulin-like growth factor binding protein
8_23	8	23	6.93463e-05	0.00256581	0.000320727	8.55272e-05	176.098	Pfam	PF00007	Cystine-knot domain
8_23	8	23	4.48905e-06	0.000166095	8.30474e-05	4.61374e-06	821.791	Pfam	PF03247	Prothymosin/parathymosin family
8_23	8	23	3.48045e-06	0.000128777	0.000128777	3.48045e-06	108.766	Pfam	PF00093	von Willebrand factor type C domain
9_146	9	146	0.000688914	0.14605	0.00256227	0.000936216	58.6993	Pfam	PF00183	Hsp90 protein
9_146	9	146	0.00050433	0.106918	0.00205611	0.000664086	20.5448	Pfam	PF01023	S-100/ICaBP type calcium binding domain
9_146	9	146	0.000239925	0.050864	0.00118288	0.0002992	26.7975	Pfam	PF00036	EF hand
1_48	1	48	8.68459e-08	2.77907e-06	4.63178e-07	1.02928e-07	391.549	MIM	135600	FIBRONECTIN 1; FN1;;FN;;LARGE, EXTERNAL, TRANSFORMATION-SENSITIVE PROTEIN; LETS
1_48	1	48	4.57742e-08	1.46477e-06	7.32387e-07	4.72508e-08	494.588	MIM	188450	THYROGLOBULIN; TG
1_48	1	48	0.000638187	0.020422	0.000202198	0	3132.39	MIM	516040	COMPLEX IV, CYTOCHROME c OXIDASE SUBUNIT II; MTCO2;;CYTOCHROME c OXIDASE II; COII; COX2
1_48	1	48	0.000638187	0.020422	0.000200216	0	3132.39	MIM	516003	COMPLEX I, SUBUNIT ND4; MTND4;;NADH-UBIQUINONE OXIDOREDUCTASE, SUBUNIT ND4;;NADH DEHYDROGENASE, SUBUNIT 4
1_48	1	48	0.000638187	0.020422	0.000198272	0	3132.39	MIM	561010	RIBOSOMAL RNA, MITOCHONDRIAL, 16S; MTRNR2;;rRNA, 16S, MITOCHONDRIALHUMANIN, INCLUDED; HN, INCLUDED;;HUMANIN, MITOCHONDRIAL, INCLUDED;;HNM, INCLUDED
1_48	1	48	0.000638187	0.020422	0.000196365	0	3132.39	MIM	516030	COMPLEX IV, CYTOCHROME c OXIDASE SUBUNIT I; MTCO1;;CYTOCHROME c OXIDASE I; CO1; COX1
1_48	1	48	0.000638187	0.020422	0.000194495	0	3132.39	MIM	123886	S100 CALCIUM-BINDING PROTEIN A9; S100A9;;CYSTIC FIBROSIS ANTIGEN B;;CALGRANULIN B; CAGB; CGLB;;MYELOID-RELATED PROTEIN 14; MRP14S100A9/S100A8 COMPLEX, INCLUDED;;CALPROTECTIN, INCLUDED
1_48	1	48	0.000638187	0.020422	0.00019266	0	3132.39	MIM	516020	CYTOCHROME b OF COMPLEX III; MTCYB;;COMPLEX III, CYTOCHROME b SUBUNIT;;UBIQUINONE-CYTOCHROME c OXIDOREDUCTASE, CYTOCHROME b SUBUNIT
1_48	1	48	0.000638187	0.020422	0.00019086	0	3132.39	MIM	516005	COMPLEX I, SUBUNIT ND5; MTND5;;NADH-UBIQUINONE OXIDOREDUCTASE, SUBUNIT ND5;;NADH DEHYDROGENASE, SUBUNIT 5
10_87	10	87	7.00875e-05	0.00490612	0.000181708	0.000111503	181.734	MIM	104760	AMYLOID BETA A4 PRECURSOR PROTEIN; APP;;AMYLOID OF AGING AND ALZHEIMER DISEASE; AAA;;CEREBRAL VASCULAR AMYLOID PEPTIDE; CVAP;;PROTEASE NEXIN II; PN2
10_87	10	87	5.20613e-07	3.64429e-05	3.64429e-05	5.20613e-07	220.677	MIM	179050	PYRUVATE KINASE, MUSCLE; PKM;;PYRUVATE KINASE 3; PK3;;OPA-INTERACTING PROTEIN 3; OIP3;;THYROID HORMONE-BINDING PROTEIN, CYTOSOLIC; THBP1PYRUVATE KINASE, MUSCLE, 1, INCLUDED; PKM1, INCLUDED;;PYRUVATE KINASE, MUSCLE, 2, INCLUDED; PKM2, INCLUDED
11_41	11	41	0.000983702	0.036397	0.00181985	0.00202205	1523.86	MIM	602728	SCAVENGER RECEPTOR CLASS A, MEMBER 3; SCARA3;;MACROPHAGE SCAVENGER RECEPTOR-LIKE 1; MSRL1;;CELLULAR STRESS RESPONSE; CSR
11_41	11	41	0.000983702	0.036397	0.00191563	0.00191563	1523.86	MIM	603718	CLAUDIN 1; CLDN1;;SENESCENCE-ASSOCIATED EPITHELIAL MEMBRANE PROTEIN 1; SEMP1
11_41	11	41	0.000983702	0.036397	0.00202205	0.00181985	1523.86	MIM	612850	TUBULIN, BETA-2B; TUBB2B;;TUBULIN, BETA, CLASS IIB
11_41	11	41	0.000655906	0.0242685	0.00202238	0.000933405	3047.73	MIM	120361	MATRIX METALLOPROTEINASE 9; MMP9;;COLLAGENASE TYPE IV-B; CLG4B;;COLLAGENASE TYPE IV, 92-KD;;COLLAGENASE TYPE V;;GELATINASE, 92-KD;;GELATINASE B; GELB
12_34	12	34	0.000797696	0.0239309	0.00170935	0.0014077	1879.43	MIM	611912	NUCLEAR CASEIN KINASE AND CYCLIN-DEPENDENT KINASE SUBSTRATE 1; NUCKS1;;NUCKS
12_34	12	34	0.000797696	0.0239309	0.00184084	0.00132949	1879.43	MIM	162060	GROWTH-ASSOCIATED PROTEIN 43; GAP43;;NEUROMODULIN;;NERVE GROWTH-RELATED PEPTIDE GAP43
13_413	13	413	0.000911187	0.304336	0.00289844	0.0013232	51.3273	MIM	164772	V-FOS FBJ MURINE OSTEOSARCOMA VIRAL ONCOGENE HOMOLOG B; FOSB;;ONCOGENE FOSB;;GOSBDELTA-FOSB, INCLUDED
13_413	13	413	0.000246371	0.0822879	0.00119258	0.000309353	111.209	MIM	610449	MITOCHONDRIAL CARRIER HOMOLOG 1; MTCH1;;PRESENILIN-ASSOCIATED PROTEIN; PSAP
14_280	14	280	0.000114576	0.0262379	0.0015434	0.000123182	163.429	MIM	604138	G PROTEIN-COUPLED RECEPTOR, FAMILY C, GROUP 5, MEMBER A; GPRC5A;;RETINOIC ACID-INDUCED 3; RAI3;;RETINOIC ACID-INDUCIBLE GENE 1; RAIG1
15_209	15	209	0.000367526	0.0639495	0.00199842	0.000447199	79.637	MIM	602377	DYNAMIN 1; DNM1
15_209	15	209	3.64811e-05	0.0063477	0.000528975	3.8943e-05	318.548	MIM	606512	PROTEIN KINASE C AND CASEIN KINASE SUBSTRATE IN NEURONS 1; PACSIN1;;KIAA1379
15_209	15	209	1.46226e-05	0.00254433	0.000318042	1.52355e-05	637.096	MIM	313440	SYNAPSIN I; SYN1;;BRAIN PROTEIN 4.1
16_119	16	119	0.000102696	0.00996151	0.000996151	0.000113199	151.873	MIM	164765	CORTACTIN; CTTN;;ONCOGENE EMS1; EMS1
16_119	16	119	0.000102696	0.00996151	0.00110683	0.000111927	151.873	MIM	608092	PALLADIN, MOUSE, HOMOLOG OF; PALLD;;KIAA0992
18_2101	18	2101	0.000127456	0.196537	0.00595567	0.000130157	18.7008	MIM	601282	PLECTIN; PLEC;;PLEC1;;PCN; PLTN
2_57	2	57	0.000833067	0.0391542	0.000815712	0	2399.28	MIM	128990	EARLY GROWTH RESPONSE 1; EGR1;;KROX24;;NERVE GROWTH FACTOR-INDUCED CLONE A; NGFIA;;ZIF268
2_57	2	57	0.000833067	0.0391542	0.000799065	0	2399.28	MIM	604031	STEAROYL-CoA DESATURASE; SCD;;SCD1;;DELTA-9-DESATURASE
2_57	2	57	0.000833067	0.0391542	0.000783083	0	2399.28	MIM	134790	FERRITIN LIGHT CHAIN; FTL
2_57	2	57	0.000833067	0.0391542	0.000767729	0	2399.28	MIM	138120	HEAT-SHOCK 70-KD PROTEIN 5; HSPA5;;GLUCOSE-REGULATED PROTEIN, 78-KD; GRP78;;IMMUNOGLOBULIN HEAVY CHAIN-BINDING PROTEIN; BIP
3_55	3	55	6.84778e-05	0.00314998	0.00010862	0.000174999	177.724	MIM	107400	SERPIN PEPTIDASE INHIBITOR, CLADE A, MEMBER 1; SERPINA1;;ALPHA-1-ANTITRYPSIN; AAT;;PROTEASE INHIBITOR 1; PI;;PI1;;ANTI-ELASTASE;;ANTITRYPSIN
3_55	3	55	0.000833067	0.0383211	0.000660709	0	2399.28	MIM	137350	GELSOLIN; GSN
4_22	4	22	0.000673687	0.0128001	0.000284446	0	1978.35	MIM	602195	HEAT-SHOCK 27-KD PROTEIN 1; HSPB1;;HEAT-SHOCK PROTEIN 27; HSP27
4_22	4	22	0.000505306	0.00960081	0.00024002	0	2967.53	MIM	604591	PHOSPHATIDYLETHANOLAMINE-BINDING PROTEIN 1; PEBP1;;PBP;;RAF KINASE INHIBITOR PROTEIN; RKIP;;HIPPOCAMPAL CHOLINERGIC NEUROSTIMULATING PEPTIDE PRECURSOR PROTEIN;;HCNP PRECURSOR PROTEIN
4_22	4	22	0.000505306	0.00960081	0.000234166	0	2967.53	MIM	600614	S100 CALCIUM-BINDING PROTEIN P; S100P
4_22	4	22	0.000336897	0.00640105	0.000182887	0	5935.05	MIM	137290	TUMOR-ASSOCIATED CALCIUM SIGNAL TRANSDUCER 2; TACSTD2;;MEMBRANE COMPONENT, CHROMOSOME 1, SURFACE MARKER 1; M1S1;;GASTROINTESTINAL TUMOR-ASSOCIATED ANTIGEN 1, 40-KD GLYCOPROTEIN; GA733-1;;GA733
4_22	4	22	0.000336897	0.00640105	0.000177807	0	5935.05	MIM	148042	KERATIN 6B, TYPE II; KRT6B;;KERATIN, EPIDERMAL TYPE II, K6B; K6B;;CYTOKERATIN 6B; CK6B;;KB10
4_22	4	22	0.000336897	0.00640105	0.000173001	0	5935.05	MIM	609301	p53 EFFECTOR RELATED TO PMP22; PERP;;THW
4_22	4	22	0.000336897	0.00640105	0.000168449	0	5935.05	MIM	601290	STRATIFIN; SFN;;14-3-3-SIGMA
5_22	5	22	0.00031917	0.00574506	0.000441928	0.000957511	6264.78	MIM	188399	THYMOSIN, BETA-10; TMSB10
5_22	5	22	0.00031917	0.00574506	0.000478755	0.000820723	6264.78	MIM	107280	SERPIN PEPTIDASE INHIBITOR, CLADE A, MEMBER 3; SERPINA3;;ALPHA-1-ANTICHYMOTRYPSIN; AACT;;ANTICHYMOTRYPSIN, ALPHA-1; ACT
5_22	5	22	0.000957222	0.01723	0.000717916	0	1252.96	MIM	600170	AQUAPORIN 3; AQP3
5_22	5	22	0.000957222	0.01723	0.0006892	0	1252.96	MIM	603634	RIBOSOMAL PROTEIN L5; RPL5
5_22	5	22	0.000957222	0.01723	0.000662692	0	1252.96	MIM	146731	INSULIN-LIKE GROWTH FACTOR-BINDING PROTEIN 2; IGFBP2;;IBP2;;IGF-BP53
5_22	5	22	0.000957222	0.01723	0.000638148	0	1252.96	MIM	305370	TISSUE INHIBITOR OF METALLOPROTEINASE 1; TIMP1;;TIMP;;ERYTHROID POTENTIATING ACTIVITY; EPA;;COLLAGENASE INHIBITOR, HUMAN; HCI
5_22	5	22	0.000957222	0.01723	0.000615357	0	1252.96	MIM	107776	AQUAPORIN 1; AQP1;;AQUAPORIN-CHIP;;AQP-CHIP;;CHANNEL-LIKE INTEGRAL MEMBRANE PROTEIN, 28-KD; CHIP28
5_22	5	22	0.000957222	0.01723	0.000594138	0	1252.96	MIM	309845	MOESIN; MSN;;MEMBRANE-ORGANIZING EXTENSION SPIKE PROTEIN
6_73	6	73	9.57372e-05	0.00583997	0.000176969	0.000201378	151.567	MIM	135600	FIBRONECTIN 1; FN1;;FN;;LARGE, EXTERNAL, TRANSFORMATION-SENSITIVE PROTEIN; LETS
7_55	7	55	0.000868494	0.0425562	0.00177318	0.00163678	2301.35	MIM	182257	PROTEINASE INHIBITOR 3; PI3;;SKIN-DERIVED ANTILEUKOPROTEINASE; SKALP;;ANTILEUKOPROTEINASE, SKIN-DERIVED;;ELAFIN;;ELASTASE-SPECIFIC INHIBITOR; ESI;;TRAPPIN 2
7_55	7	55	0.000868494	0.0425562	0.00185027	0.00157616	2301.35	MIM	600915	NESTIN; NES
8_23	8	23	0.000407801	0.00937943	0.000407801	0.00937943	4902.87	MIM	188826	TISSUE INHIBITOR OF METALLOPROTEINASE 3; TIMP3
8_23	8	23	0.000407801	0.00937943	0.000426338	0.00468972	4902.87	MIM	106150	ANGIOTENSINOGEN; AGT;;SERPINA8IgA NEPHROPATHY, PROGRESSION TO RENAL FAILURE IN, SUSCEPTIBILITY TO,INCLUDED;;ANGIOTENSIN I, INCLUDED;;ANGIOTENSIN II, INCLUDED
8_23	8	23	0.000407801	0.00937943	0.00044664	0.00312648	4902.87	MIM	121014	GAP JUNCTION PROTEIN, ALPHA-1; GJA1;;GAP JUNCTION PROTEIN, 43-KD;;CONNEXIN 43; CX43;;HEART CONNEXIN
8_23	8	23	0.000407801	0.00937943	0.000468972	0.00234486	4902.87	MIM	121009	CONNECTIVE TISSUE GROWTH FACTOR; CTGF;;INSULIN-LIKE GROWTH FACTOR-BINDING PROTEIN 8; IGFBP8;;CCN2
8_23	8	23	0.000407801	0.00937943	0.000493654	0.00187589	4902.87	MIM	165370	RAS HOMOLOG GENE FAMILY, MEMBER B; RHOB;;APLYSIA RAS-RELATED HOMOLOG 6; ARH6;;ARHB;;ONCOGENE RHO H6; RHOH6
8_23	8	23	0.000407801	0.00937943	0.00052108	0.00156324	4902.87	MIM	600714	DUAL-SPECIFICITY PHOSPHATASE 1; DUSP1;;PROTEIN-TYROSINE PHOSPHATASE, NONRECEPTOR-TYPE, 10; PTPN10;;CL100;;MAP KINASE PHOSPHATASE 1; MKP1
8_23	8	23	0.000815444	0.0187552	0.000669829	0	1634.29	MIM	182330	ATPase, Na+/K+ TRANSPORTING, BETA-1 POLYPEPTIDE; ATP1B1;;Na,K-ATPase BETA-1 POLYPEPTIDE
8_23	8	23	0.000611642	0.0140678	0.000562711	0	2451.43	MIM	601145	CYSTATIN B; CSTB;;STEFIN B; STFB
8_23	8	23	0.000611642	0.0140678	0.000541068	0	2451.43	MIM	602369	CYSTEINE-RICH, ANGIOGENIC INDUCER, 61; CYR61;;CYSTEINE-RICH PROTEIN 61, MOUSE, HOMOLOG OF;;INSULIN-LIKE GROWTH FACTOR-BINDING PROTEIN 10; IGFBP10;;CCN FAMILY, MEMBER 1; CCN1
1_48	1	48	2.20168e-06	5.06386e-05	2.20168e-06	5.06386e-05	16.1213	KEGG	hsa04512	ECM-receptor interaction - Homo sapiens (human)
1_48	1	48	3.68933e-05	0.000848545	1.69709e-05	0	13.5574	KEGG	hsa05100	Bacterial invasion of epithelial cells - Homo sapiens (human)
1_48	1	48	4.19987e-06	9.6597e-05	3.44989e-06	0	8.6159	KEGG	hsa04510	Focal adhesion - Homo sapiens (human)
10_87	10	87	0.000462706	0.0328521	0.000586645	0.00205326	7.9792	KEGG	hsa00010	Glycolysis / Gluconeogenesis - Homo sapiens (human)
11_41	11	41	0.000962852	0.0385141	0.00226554	0.00160475	6.65672	KEGG	hsa05016	Huntington's disease - Homo sapiens (human)
13_413	13	413	2.42769e-05	0.00361726	0.00014469	2.89381e-05	3.67919	KEGG	hsa03010	Ribosome - Homo sapiens (human)
13_413	13	413	2.2152e-05	0.00330064	0.000137527	2.61956e-05	4.95599	KEGG	hsa05130	Pathogenic Escherichia coli infection - Homo sapiens (human)
14_280	14	280	0.000922483	0.120845	0.00215795	0.00159007	4.09751	KEGG	hsa04512	ECM-receptor interaction - Homo sapiens (human)
16_119	16	119	0.000826292	0.0669296	0.00191228	0.00142403	3.72387	KEGG	hsa04514	Cell adhesion molecules (CAMs) - Homo sapiens (human)
16_119	16	119	0.000726395	0.058838	0.0020289	0.00111015	7.24525	KEGG	hsa05130	Pathogenic Escherichia coli infection - Homo sapiens (human)
18_2101	18	2101	0.000336041	0.0651919	0.00141721	0.000437529	1.96524	KEGG	hsa00190	Oxidative phosphorylation - Homo sapiens (human)
2_57	2	57	1.25135e-05	0.000788352	3.58342e-05	1.87703e-05	9.28717	KEGG	hsa03010	Ribosome - Homo sapiens (human)
3_55	3	55	6.25388e-06	0.000325202	3.61335e-05	7.39095e-06	10.3191	KEGG	hsa03010	Ribosome - Homo sapiens (human)
4_22	4	22	7.27608e-07	1.23693e-05	1.23693e-05	7.27608e-07	29.1882	KEGG	hsa03010	Ribosome - Homo sapiens (human)
6_73	6	73	1.6364e-12	1.03093e-10	3.43644e-11	1.69005e-12	16.7897	KEGG	hsa03010	Ribosome - Homo sapiens (human)
7_55	7	55	0.000441722	0.0172272	0.000861359	0.000861359	6.15902	KEGG	hsa04510	Focal adhesion - Homo sapiens (human)
7_55	7	55	2.92637e-06	0.000114128	1.90214e-05	3.35672e-06	15.3656	KEGG	hsa04512	ECM-receptor interaction - Homo sapiens (human)
9_146	9	146	0.000657983	0.0605345	0.00108097	0.00163607	4.92404	KEGG	hsa04512	ECM-receptor interaction - Homo sapiens (human)
9_146	9	146	3.41398e-05	0.00314086	0.000101318	5.06591e-05	8.05373	KEGG	hsa05130	Pathogenic Escherichia coli infection - Homo sapiens (human)
9_146	9	146	1.48451e-10	1.36575e-08	1.95107e-09	1.58808e-10	9.39535	KEGG	hsa03010	Ribosome - Homo sapiens (human)
1_48	1	48	0.000646065	0.079466	0.000735797	0.00496663	56.6344	IPR	IPR032444	Keratin type II head
1_48	1	48	0.00059229	0.0728516	0.000728516	0.00303549	59.2685	IPR	IPR003054	Keratin, type II
1_48	1	48	0.000566258	0.0696497	0.000710712	0.00267884	60.6797	IPR	IPR020902	Actin/actin-like conserved site
1_48	1	48	0.000540798	0.0665182	0.000692898	0.00237565	62.1597	IPR	IPR004001	Actin, conserved site
1_48	1	48	0.000422108	0.0519193	0.000570542	0.00157331	70.793	IPR	IPR004161	Translation elongation factor EFTu-like, domain 2
1_48	1	48	0.000298742	0.0367452	0.000442714	0.000896225	84.9515	IPR	IPR019577	SPARC/Testican, calcium-binding domain
1_48	1	48	0.000262272	0.0322595	0.000413583	0.000701293	91.0195	IPR	IPR031157	Tr-type G domain, conserved site
1_48	1	48	0.000196356	0.0241518	0.000330846	0.000473564	106.189	IPR	IPR003645	Follistatin-like, N-terminal
1_48	1	48	6.77808e-05	0.00833704	0.000134468	0.000134468	12.1823	IPR	IPR003006	Immunoglobulin/major histocompatibility complex, conserved site
1_48	1	48	5.1297e-05	0.00630953	0.000110693	9.4172e-05	44.4514	IPR	IPR013806	Kringle-like fold
1_48	1	48	4.0165e-05	0.0049403	9.68686e-05	6.76753e-05	254.855	IPR	IPR015369	Follistatin/Osteonectin EGF domain
1_48	1	48	2.19422e-05	0.00269889	6.42593e-05	3.29133e-05	364.078	IPR	IPR001999	Osteonectin-like, conserved site
1_48	1	48	6.13994e-06	0.000755212	2.28852e-05	8.29904e-06	93.2395	IPR	IPR000885	Fibrillar collagen, C-terminal
1_48	1	48	6.10768e-06	0.000751245	2.34764e-05	8.16571e-06	849.515	IPR	IPR001750	NADH:quinone oxidoreductase/Mrp antiporter, membrane subunit
1_48	1	48	4.95057e-06	0.000608921	2.09973e-05	6.40969e-06	100.601	IPR	IPR000562	Fibronectin, type II, collagen-binding
1_48	1	48	1.07807e-06	0.000132602	7.3668e-06	1.25097e-06	173.765	IPR	IPR000083	Fibronectin, type I
1_48	1	48	6.30487e-07	7.75499e-05	5.53928e-06	7.04999e-07	32.6737	IPR	IPR001664	Intermediate filament protein
1_48	1	48	6.1162e-08	7.52292e-06	1.50458e-06	6.32178e-08	53.0947	IPR	IPR018039	Intermediate filament protein, conserved site
10_87	10	87	0.000933688	0.239958	0.00303744	0.00134055	9.54153	IPR	IPR011598	Myc-type, basic helix-loop-helix (bHLH) domain
10_87	10	87	0.000650645	0.167216	0.00229063	0.000903869	57.7996	IPR	IPR001101	Plectin repeat
10_87	10	87	0.000604702	0.155408	0.00235467	0.000809418	60.1116	IPR	IPR003650	Orange domain
10_87	10	87	0.000560401	0.144023	0.00228608	0.00073858	62.6163	IPR	IPR015813	Pyruvate/Phosphoenolpyruvate kinase-like domain
10_87	10	87	0.000363701	0.093471	0.0017636	0.000455956	79.0942	IPR	IPR001697	Pyruvate kinase
10_87	10	87	0.000329352	0.0846434	0.00165967	0.000408905	83.4883	IPR	IPR015793	Pyruvate kinase, barrel
10_87	10	87	0.000329352	0.0846434	0.00169287	0.000406939	83.4883	IPR	IPR011037	Pyruvate kinase-like, insert domain
10_87	10	87	0.000236369	0.0607469	0.00132059	0.000286542	100.186	IPR	IPR015806	Pyruvate kinase, beta-barrel insert domain
10_87	10	87	0.000208745	0.0536474	0.00124761	0.000249523	107.342	IPR	IPR018209	Pyruvate kinase, active site
10_87	10	87	0.000182813	0.0469828	0.00111864	0.000217513	115.599	IPR	IPR015794	Pyruvate kinase, alpha/beta
10_87	10	87	0.000182813	0.0469828	0.00114592	0.000216511	115.599	IPR	IPR015795	Pyruvate kinase, C-terminal
10_87	10	87	0.000115215	0.0296101	0.000779214	0.000134591	150.279	IPR	IPR028866	Amyloid beta A4 protein
10_87	10	87	8.70773e-05	0.0223789	0.000678147	9.94616e-05	37.5698	IPR	IPR002223	Pancreatic trypsin inhibitor Kunitz domain
10_87	10	87	7.86937e-05	0.0202243	0.000652397	8.90938e-05	187.849	IPR	IPR013803	Amyloidogenic glycoprotein, amyloid-beta peptide
10_87	10	87	7.52587e-05	0.0193415	0.000690768	8.40935e-05	39.5471	IPR	IPR020901	Proteinase inhibitor I2, Kunitz, conserved site
10_87	10	87	5.23587e-06	0.00134562	8.41012e-05	5.56041e-06	102.463	IPR	IPR015849	Amyloidogenic glycoprotein, heparin-binding
10_87	10	87	5.23587e-06	0.00134562	8.9708e-05	5.53753e-06	102.463	IPR	IPR008154	Amyloidogenic glycoprotein, extracellular
10_87	10	87	4.61212e-06	0.00118531	9.1178e-05	4.83802e-06	107.342	IPR	IPR024329	Amyloidogenic glycoprotein, E2 domain
10_87	10	87	3.51616e-06	0.000903652	8.21502e-05	3.65851e-06	118.641	IPR	IPR008155	Amyloidogenic glycoprotein
10_87	10	87	3.51616e-06	0.000903652	9.03652e-05	3.64376e-06	118.641	IPR	IPR011178	Amyloidogenic glycoprotein, copper-binding
10_87	10	87	3.03968e-06	0.000781197	8.67997e-05	3.13734e-06	125.233	IPR	IPR019744	Amyloidogenic glycoprotein, extracellular domain conserved site
10_87	10	87	2.60801e-06	0.000670259	0.00011171	2.65976e-06	132.599	IPR	IPR019745	Amyloidogenic glycoprotein, intracellular domain, conserved site
10_87	10	87	2.60801e-06	0.000670259	0.000134052	2.64925e-06	132.599	IPR	IPR019543	Beta-amyloid precursor protein C-terminal
11_41	11	41	0.000996519	0.174391	0.00830432	0.0011251	15.8133	IPR	IPR008160	Collagen triple helix repeat
12_34	12	34	0.000798243	0.088605	0.005907	0.000913453	17.009	IPR	IPR001715	Calponin homology domain
12_34	12	34	0.000673576	0.0747669	0.00623058	0.000747669	54.7528	IPR	IPR002957	Keratin, type I
12_34	12	34	0.000338416	0.0375642	0.00469552	0.000361194	78.2183	IPR	IPR000533	Tropomyosin
13_413	13	413	0.00095945	0.915316	0.00855435	0.00107938	9.77323	IPR	IPR013787	S100/CaBP-9k-type, calcium binding, subdomain
13_413	13	413	0.000856172	0.816788	0.00785373	0.000959797	10.0937	IPR	IPR026823	Complement Clr-like EGF domain
13_413	13	413	0.000855748	0.816384	0.00792606	0.000958197	61.5714	IPR	IPR029595	Dual oxidase 1
13_413	13	413	0.000613881	0.585643	0.00636568	0.000678613	76.9642	IPR	IPR002112	Transcription factor Jun
13_413	13	413	0.000613881	0.585643	0.00643564	0.000677827	76.9642	IPR	IPR005643	Jun-like transcription factor
13_413	13	413	0.000555146	0.529609	0.00601828	0.000610852	20.9902	IPR	IPR029760	Glutathione peroxidase conserved site
13_413	13	413	0.000411018	0.392111	0.00478184	0.000449154	102.619	IPR	IPR024600	Domain of unknown function DUF3454, notch
13_413	13	413	0.000327259	0.312205	0.00416274	0.000354779	25.6547	IPR	IPR029759	Glutathione peroxidase active site
13_413	13	413	0.000292376	0.278926	0.00382091	0.000316243	4.00855	IPR	IPR009030	Growth factor receptor cysteine-rich domain
13_413	13	413	0.00028097	0.268045	0.00372285	0.000303562	3.25907	IPR	IPR018247	EF-Hand 1, calcium-binding site
13_413	13	413	0.000177609	0.169439	0.0026895	0.000189954	4.27579	IPR	IPR018097	EGF-like calcium-binding, conserved site
13_413	13	413	7.31411e-05	0.0697766	0.00142401	7.70161e-05	46.1785	IPR	IPR029589	Thyroid peroxidase
13_413	13	413	4.73483e-05	0.0451703	0.00112926	4.93664e-05	22.8042	IPR	IPR003019	Metallothionein
13_413	13	413	4.73483e-05	0.0451703	0.00115821	4.93125e-05	22.8042	IPR	IPR017854	Metallothionein domain
13_413	13	413	4.73483e-05	0.0451703	0.00118869	4.92588e-05	22.8042	IPR	IPR023587	Metallothionein domain, vertebrate
13_413	13	413	4.73483e-05	0.0451703	0.00122082	4.92051e-05	22.8042	IPR	IPR000006	Metallothionein, vertebrate
13_413	13	413	3.84401e-05	0.0366718	0.00111127	3.97742e-05	3.55767	IPR	IPR013032	EGF-like, conserved site
13_413	13	413	2.77035e-05	0.0264291	0.000880972	2.85721e-05	3.32501	IPR	IPR000742	EGF-like domain
13_413	13	413	2.69574e-05	0.0257173	0.000886805	2.77725e-05	26.7702	IPR	IPR018064	Metallothionein, vertebrate, metal binding site
13_413	13	413	7.9709e-06	0.00760424	0.000422458	8.11551e-06	4.68634	IPR	IPR001881	EGF-like calcium-binding domain
13_413	13	413	7.77614e-06	0.00741844	0.000436379	7.90878e-06	5.1026	IPR	IPR000152	EGF-type aspartate/asparagine hydroxylation site
13_413	13	413	7.76707e-06	0.00740979	0.000463112	7.89115e-06	20.8011	IPR	IPR010255	Haem peroxidase
13_413	13	413	3.81342e-06	0.003638	0.000303167	3.8579e-06	4.6645	IPR	IPR012336	Thioredoxin-like fold
13_413	13	413	5.38229e-07	0.00051347	6.41837e-05	5.42207e-07	23.0893	IPR	IPR019791	Haem peroxidase, animal
14_280	14	280	0.000902747	0.645464	0.011953	0.000975022	4.71894	IPR	IPR000152	EGF-type aspartate/asparagine hydroxylation site
14_280	14	280	0.000874836	0.625508	0.0127655	0.000937793	4.74515	IPR	IPR018097	EGF-like calcium-binding, conserved site
14_280	14	280	0.000846233	0.605057	0.0126053	0.000905773	17.4312	IPR	IPR017998	Chaperone tailless complex polypeptide 1 (TCP-1)
14_280	14	280	0.000643475	0.460085	0.0112216	0.000681607	19.266	IPR	IPR027410	TCP-1-like chaperonin intermediate domain
14_280	14	280	0.000643475	0.460085	0.0115021	0.000680598	19.266	IPR	IPR002194	Chaperonin TCP-1, conserved site
14_280	14	280	0.0005877	0.420206	0.0113569	0.00061886	69.7247	IPR	IPR001999	Osteonectin-like, conserved site
14_280	14	280	0.000539018	0.385398	0.0110114	0.00056593	3.41093	IPR	IPR000742	EGF-like domain
14_280	14	280	0.000485654	0.347243	0.010213	0.000509153	4.57211	IPR	IPR001881	EGF-like calcium-binding domain
14_280	14	280	0.000337439	0.241269	0.00861675	0.000350682	24.4037	IPR	IPR019577	SPARC/Testican, calcium-binding domain
14_280	14	280	0.000153173	0.109519	0.00547595	0.000157355	16.0024	IPR	IPR002423	Chaperonin Cpn60/TCP-1 family
14_280	14	280	0.000144212	0.103112	0.00542694	0.000147937	16.2691	IPR	IPR027413	GroEL-like equatorial domain
14_280	14	280	6.73015e-05	0.0481206	0.0043746	6.82562e-05	12.5792	IPR	IPR001007	VWFC domain
14_280	14	280	5.04805e-05	0.0360936	0.0040104	5.10517e-05	21.6921	IPR	IPR027409	GroEL-like apical domain
14_280	14	280	2.37336e-05	0.0169695	0.00242422	2.39345e-05	4.51223	IPR	IPR013032	EGF-like, conserved site
15_209	15	209	0.000811949	0.503409	0.00915288	0.000889414	56.1201	IPR	IPR027741	Dynamin-1
15_209	15	209	0.000811949	0.503409	0.00932238	0.000887846	56.1201	IPR	IPR001359	Synapsin
15_209	15	209	0.000811949	0.503409	0.00949827	0.000886283	56.1201	IPR	IPR020003	ATPase, alpha/beta subunit, nucleotide-binding domain, active site
15_209	15	209	0.000811949	0.503409	0.00968093	0.000884725	56.1201	IPR	IPR015070	DJBP, EF-hand domain
15_209	15	209	0.000678222	0.420498	0.00858159	0.000735136	62.3557	IPR	IPR001990	Chromogranin/secretogranin
15_209	15	209	0.000678222	0.420498	0.00876037	0.000733853	62.3557	IPR	IPR001646	Pentapeptide repeat
15_209	15	209	0.00055622	0.344856	0.00783764	0.000597671	70.1501	IPR	IPR022308	Synaptic vesicle protein SV2
15_209	15	209	0.00055622	0.344856	0.00801991	0.000596637	70.1501	IPR	IPR020898	Synapsin, ATP-binding domain
15_209	15	209	0.00055622	0.344856	0.00821086	0.000595607	70.1501	IPR	IPR009161	ATP-dependent 6-phosphofructokinase, eukaryotic-type
15_209	15	209	0.000446027	0.276537	0.00727729	0.000474334	80.1716	IPR	IPR019736	Synapsin, phosphorylation site
15_209	15	209	0.000446027	0.276537	0.00747397	0.000473522	80.1716	IPR	IPR020897	Synapsin, pre-ATP-grasp domain
15_209	15	209	0.000446027	0.276537	0.00768158	0.000472713	80.1716	IPR	IPR018054	Chromogranin, conserved site
15_209	15	209	0.00034773	0.215593	0.0069546	0.000365411	93.5335	IPR	IPR019735	Synapsin, conserved site
15_209	15	209	0.000261414	0.162077	0.00578845	0.000273316	112.24	IPR	IPR006267	Adenylate kinase, isozyme 1/5
15_209	15	209	7.5221e-05	0.046637	0.00310914	7.69588e-05	280.6	IPR	IPR028713	Synapsin-1
15_209	15	209	7.5221e-05	0.046637	0.00333122	7.6832e-05	280.6	IPR	IPR028518	Protein kinase C and casein kinase substrate in neurons protein 1
16_119	16	119	0.000904925	0.304055	0.00800145	0.00101691	49.3924	IPR	IPR025661	Cysteine peptidase, asparagine active site
16_119	16	119	0.000841413	0.282715	0.00764094	0.000942382	5.61084	IPR	IPR003597	Immunoglobulin C1-set
16_119	16	119	0.000759228	0.255101	0.00822905	0.000833662	54.3316	IPR	IPR014836	Integrin beta subunit, cytoplasmic domain
16_119	16	119	0.000505319	0.169787	0.00808511	0.000537301	67.9146	IPR	IPR013201	Cathepsin propeptide inhibitor domain (I29)
16_119	16	119	9.36102e-05	0.031453	0.00393163	9.56019e-05	181.105	IPR	IPR003134	Hs1/Cortactin
16_119	16	119	7.02933e-05	0.0236185	0.00393642	7.13551e-05	217.327	IPR	IPR015503	Cortactin
16_119	16	119	6.62988e-05	0.0222764	0.00445528	6.70976e-05	7.27192	IPR	IPR003006	Immunoglobulin/major histocompatibility complex, conserved site
18_2101	18	2101	0.000818715	1	0.0295243	0.000841769	11.7033	IPR	IPR018525	Mini-chromosome maintenance, conserved site
18_2101	18	2101	0.000683346	1	0.0259228	0.000701601	26.3324	IPR	IPR022750	Interferon regulatory factor 2-binding protein 1 & 2, zinc finger
18_2101	18	2101	0.00048842	1	0.0241809	0.000498315	1.89345	IPR	IPR013032	EGF-like, conserved site
18_2101	18	2101	0.000347966	1	0.0211752	0.000353656	2.08218	IPR	IPR005225	Small GTP-binding protein domain
18_2101	18	2101	0.000306968	0.896652	0.0203785	0.000311554	2.06935	IPR	IPR013098	Immunoglobulin I-set
18_2101	18	2101	0.000219438	0.64098	0.0160245	0.000222408	8.10229	IPR	IPR001101	Plectin repeat
18_2101	18	2101	9.3745e-05	0.273829	0.00977962	9.46197e-05	2.30229	IPR	IPR001881	EGF-like calcium-binding domain
2_57	2	57	0.000484895	0.100373	0.00228121	0.000612032	66.454	IPR	IPR002452	Alpha tubulin
2_57	2	57	4.71597e-05	0.00976206	0.000348645	5.42337e-05	21.129	IPR	IPR001664	Intermediate filament protein
2_57	2	57	7.38842e-06	0.0015294	8.99649e-05	8.00735e-06	34.3346	IPR	IPR018039	Intermediate filament protein, conserved site
3_55	3	55	0.000762899	0.135796	0.00238239	0.00111308	52.0714	IPR	IPR027401	Myosin-like IQ motif-containing domain
3_55	3	55	0.000689247	0.122686	0.00219082	0.000997447	18.0247	IPR	IPR001664	Intermediate filament protein
3_55	3	55	0.000668751	0.119038	0.00216432	0.000959981	55.7908	IPR	IPR020902	Actin/actin-like conserved site
3_55	3	55	0.000668751	0.119038	0.0022044	0.000952301	55.7908	IPR	IPR002928	Myosin tail
3_55	3	55	0.000552642	0.0983702	0.00192883	0.000768518	61.6635	IPR	IPR004009	Myosin, N-terminal, SH3-like
3_55	3	55	0.000171575	0.0305404	0.000848344	0.000213569	29.2902	IPR	IPR018039	Intermediate filament protein, conserved site
3_55	3	55	7.73951e-05	0.0137763	0.000459211	9.24586e-05	38.6244	IPR	IPR004000	Actin family
3_55	3	55	2.68905e-05	0.00478651	0.000239326	3.01038e-05	55.7908	IPR	IPR013787	S100/CaBP-9k-type, calcium binding, subdomain
3_55	3	55	1.63923e-05	0.00291783	0.000194522	1.77916e-05	66.3174	IPR	IPR001751	S100/Calbindin-D9k, conserved site
3_55	3	55	7.89126e-06	0.00140464	0.000140464	8.3115e-06	85.7273	IPR	IPR004001	Actin, conserved site
4_22	4	22	0.000897492	0.0628244	0.00128213	0.00285566	1670.33	IPR	IPR023419	Transthyretin, conserved site
4_22	4	22	0.000897492	0.0628244	0.00130884	0.0027315	1670.33	IPR	IPR001858	Phosphatidylethanolamine-binding, conserved site
4_22	4	22	0.000897492	0.0628244	0.00133669	0.00261768	1670.33	IPR	IPR015664	P53-induced protein
4_22	4	22	0.000598416	0.0418891	0.000974166	0.00149604	3340.66	IPR	IPR028494	Protein S100-P
4_22	4	22	0.000102947	0.0072063	0.0002669	0.00016378	142.156	IPR	IPR023410	14-3-3 domain
4_22	4	22	9.46676e-05	0.00662673	0.000265069	0.000144059	148.474	IPR	IPR000308	14-3-3 protein
4_22	4	22	8.6732e-05	0.00607124	0.000252968	0.000129175	155.38	IPR	IPR023409	14-3-3 protein, conserved site
5_22	5	22	0.000784301	0.0698028	0.00317285	0.00102651	2548.55	IPR	IPR025607	Ribosomal protein L5 eukaryotic/L18 archaeal, C-terminal
5_22	5	22	0.000784301	0.0698028	0.00332394	0.00101163	2548.55	IPR	IPR023275	Aquaporin 3
5_22	5	22	0.000274454	0.0244264	0.00222058	0.000309195	86.3914	IPR	IPR008993	Tissue inhibitor of metalloproteinases-like, OB-fold
5_22	5	22	0.000239605	0.0213248	0.00213248	0.00026656	92.6744	IPR	IPR001134	Netrin domain
5_22	5	22	0.00015582	0.013868	0.00346701	0.000161256	115.843	IPR	IPR000425	Major intrinsic protein
5_22	5	22	0.000136052	0.0121086	0.00403621	0.00013918	124.319	IPR	IPR023271	Aquaporin-like
5_22	5	22	4.17867e-05	0.00371902	0.00371902	4.17867e-05	231.686	IPR	IPR022357	Major intrinsic protein, conserved site
6_73	6	73	0.000893419	0.219781	0.00399602	0.00114469	48.368	IPR	IPR000562	Fibronectin, type II, collagen-binding
6_73	6	73	0.000723681	0.178025	0.00342357	0.000912951	54.0584	IPR	IPR027789	Syndecan/Neurexin domain
6_73	6	73	0.000683967	0.168256	0.00343379	0.000849777	55.6965	IPR	IPR000020	Anaphylatoxin/fibulin
6_73	6	73	0.000468721	0.115305	0.0024533	0.000576526	68.0735	IPR	IPR007084	BRICHOS domain
6_73	6	73	0.000319784	0.0786668	0.0019187	0.000381878	83.5448	IPR	IPR000083	Fibronectin, type I
6_73	6	73	0.000122446	0.0301217	0.0008141	0.000143437	141.383	IPR	IPR001050	Syndecan
6_73	6	73	6.43231e-05	0.0158235	0.000494484	7.35976e-05	204.221	IPR	IPR030479	Syndecan, conserved site
7_55	7	55	3.57316e-05	0.00582425	0.000485354	3.83175e-05	22.6071	IPR	IPR008160	Collagen triple helix repeat
7_55	7	55	7.88178e-06	0.00128473	0.000160591	8.23545e-06	686.692	IPR	IPR004687	Lysosomal-associated transmembrane protein 4/5
8_23	8	23	0.000986291	0.105533	0.00310392	0.00142612	2026.3	IPR	IPR015612	Metalloproteinase inhibitor 3
8_23	8	23	0.000986291	0.105533	0.00319797	0.00140711	2026.3	IPR	IPR002261	Gap junction alpha-1 protein (Cx43)
8_23	8	23	0.000986291	0.105533	0.00329791	0.00138859	2026.3	IPR	IPR000227	Angiotensinogen
8_23	8	23	0.000986291	0.105533	0.00340429	0.00137056	2026.3	IPR	IPR013124	Gap junction alpha-1 protein (Cx43), C-terminal
8_23	8	23	0.000378358	0.0404843	0.00238143	0.000444883	73.6838	IPR	IPR006207	Cystine knot, C-terminal
8_23	8	23	0.000235607	0.02521	0.00168066	0.000271075	94.2467	IPR	IPR000867	Insulin-like growth factor-binding protein, IGFBP
8_23	8	23	0.000104027	0.0111309	0.00111309	0.000113581	144.736	IPR	IPR006208	Glycoprotein hormone subunit beta, cystine knot
8_23	8	23	8.40207e-05	0.00899021	0.000998912	9.08102e-05	162.104	IPR	IPR017891	Insulin-like growth factor binding protein, N-terminal, Cys-rich conserved site
8_23	8	23	6.36704e-05	0.00681273	0.000973248	6.74528e-05	40.7981	IPR	IPR000884	Thrombospondin type-1 (TSP1) repeat
8_23	8	23	1.82817e-05	0.00195614	0.000391229	1.89917e-05	62.6692	IPR	IPR001007	VWFC domain
8_23	8	23	8.6678e-06	0.000927455	0.000231864	8.91783e-06	578.944	IPR	IPR012395	IGFBP-related, CNN
8_23	8	23	8.6678e-06	0.000927455	0.000309152	8.8329e-06	578.944	IPR	IPR004931	Prothymosin/parathymosin
9_146	9	146	0.00099713	0.466657	0.00717933	0.00115509	48.1326	IPR	IPR020575	Heat shock protein Hsp90, N-terminal
9_146	9	146	0.000701042	0.328088	0.00565669	0.000798267	18.3362	IPR	IPR013787	S100/CaBP-9k-type, calcium binding, subdomain
9_146	9	146	0.00058387	0.273251	0.0049682	0.000660027	19.5794	IPR	IPR008993	Tissue inhibitor of metalloproteinases-like, OB-fold
9_146	9	146	0.000512727	0.239956	0.00452747	0.000576817	70.011	IPR	IPR019805	Heat shock protein Hsp90, conserved site
9_146	9	146	0.000432908	0.202601	0.00405202	0.000483535	21.7959	IPR	IPR001751	S100/Calbindin-D9k, conserved site
9_146	9	146	0.000297334	0.139152	0.00302505	0.000328965	96.2652	IPR	IPR028559	Filamin A
1_48	1	48	0.000918141	0.534358	0.00460653	0.00114424	48.2417	GO	GO:1902230	negative regulation of intrinsic apoptotic signaling pathway in response to DNA damage
1_48	1	48	0.0005589	0.32528	0.0033534	0.000669299	62.924	GO	GO:0002009	morphogenesis of an epithelium
1_48	1	48	0.00044446	0.258676	0.00278146	0.00052791	11.7186	GO	GO:0005178	integrin binding
1_48	1	48	0.000431538	0.251155	0.00272994	0.000511517	72.3626	GO	GO:0046688	response to copper ion
1_48	1	48	0.0004182	0.243393	0.00270436	0.000493697	21.7088	GO	GO:0001932	regulation of protein phosphorylation
1_48	1	48	0.0004182	0.243393	0.00273475	0.000492698	21.7088	GO	GO:0001568	blood vessel development
1_48	1	48	0.000350805	0.204168	0.00234676	0.00041163	23.0944	GO	GO:0071230	cellular response to amino acid stimulus
1_48	1	48	0.00032033	0.186432	0.00216781	0.000375115	85.1324	GO	GO:0070208	protein heterotrimerization
1_48	1	48	0.00030033	0.174792	0.00208086	0.000350285	24.3919	GO	GO:0006953	acute-phase response
1_48	1	48	0.000290835	0.169266	0.00206422	0.000337857	24.6691	GO	GO:0042542	response to hydrogen peroxide
1_48	1	48	0.000286874	0.166961	0.00206124	0.000332591	90.4532	GO	GO:0055093	response to hyperoxia
1_48	1	48	0.000272431	0.158555	0.00198194	0.000315219	25.2428	GO	GO:0030199	collagen fibril organization
1_48	1	48	0.000255233	0.148546	0.00192916	0.000293568	96.4834	GO	GO:0042773	ATP synthesis coupled electron transport
1_48	1	48	0.000245717	0.143007	0.00188167	0.000282065	9.3011	GO	GO:0005882	intermediate filament
1_48	1	48	0.000237917	0.138468	0.00184623	0.000272574	26.4741	GO	GO:0034446	substrate adhesion-dependent cell spreading
1_48	1	48	0.000225412	0.13119	0.00177284	0.00025774	103.375	GO	GO:0043589	skin morphogenesis
1_48	1	48	0.000171252	0.0996684	0.00138428	0.000195046	120.604	GO	GO:1904714	regulation of chaperone-mediated autophagy
1_48	1	48	0.000151676	0.0882754	0.00124332	0.000172413	31.0125	GO	GO:0070372	regulation of ERK1 and ERK2 cascade
1_48	1	48	0.000146922	0.0855085	0.00122155	0.000166683	131.568	GO	GO:0097433	dense body
1_48	1	48	0.000146922	0.0855085	0.00123925	0.000166359	131.568	GO	GO:0042289	MHC class II protein binding
1_48	1	48	0.000145592	0.0847347	0.0012461	0.000164533	31.462	GO	GO:0001895	retina homeostasis
1_48	1	48	0.000122847	0.0714967	0.00108328	0.000138291	33.3981	GO	GO:0035987	endodermal cell differentiation
1_48	1	48	0.000117943	0.0686428	0.00107254	0.00013226	16.7312	GO	GO:0022617	extracellular matrix disassembly
1_48	1	48	8.79301e-05	0.0511753	0.000812307	9.84141e-05	18.0906	GO	GO:0005201	extracellular matrix structural constituent
1_48	1	48	5.31454e-05	0.0309306	0.00051551	5.91408e-05	20.675	GO	GO:0030574	collagen catabolic process
1_48	1	48	5.29838e-05	0.0308366	0.000522654	5.88484e-05	241.209	GO	GO:0045277	respiratory chain complex IV
1_48	1	48	5.29838e-05	0.0308366	0.000531665	5.87363e-05	241.209	GO	GO:0035606	peptidyl-cysteine S-trans-nitrosylation
1_48	1	48	3.59704e-05	0.0209348	0.000427241	3.92037e-05	14.1333	GO	GO:0001501	skeletal system development
1_48	1	48	3.56827e-05	0.0207673	0.000441858	3.8745e-05	22.9722	GO	GO:0045471	response to ethanol
1_48	1	48	2.89034e-05	0.0168218	0.000382313	3.12092e-05	55.6635	GO	GO:0005577	fibrinogen complex
1_48	1	48	2.49263e-05	0.0145071	0.000337375	2.6865e-05	58.6724	GO	GO:0010952	positive regulation of peptidase activity
1_48	1	48	1.17523e-05	0.00683985	0.000170996	1.25964e-05	30.7926	GO	GO:0018149	peptide cross-linking
1_48	1	48	1.13954e-05	0.00663215	0.000170055	1.21915e-05	723.626	GO	GO:0005584	collagen type I trimer
1_48	1	48	1.03491e-05	0.00602318	0.000158505	1.10517e-05	80.4029	GO	GO:0046686	response to cadmium ion
1_48	1	48	9.32381e-06	0.00542645	0.000146661	9.93856e-06	83.4953	GO	GO:0033622	integrin activation
1_48	1	48	8.26337e-06	0.00480928	0.000133591	8.7921e-06	13.3183	GO	GO:0050900	leukocyte migration
1_48	1	48	7.7587e-06	0.00451556	0.000129016	8.24007e-06	2.78061	GO	GO:0070062	extracellular exosome
1_48	1	48	7.08842e-06	0.00412546	0.000121337	7.5145e-06	19.9897	GO	GO:0007568	aging
1_48	1	48	2.93603e-06	0.00170877	6.57219e-05	3.06781e-06	127.699	GO	GO:0048407	platelet-derived growth factor binding
1_48	1	48	2.4982e-06	0.00145395	5.81581e-05	2.60565e-06	135.68	GO	GO:2001202	negative regulation of transforming growth factor-beta secretion
1_48	1	48	2.25196e-06	0.00131064	5.46101e-05	2.34462e-06	25.4798	GO	GO:0042060	wound healing
1_48	1	48	1.45358e-06	0.000845981	3.84537e-05	1.50799e-06	18.1663	GO	GO:0002576	platelet degranulation
1_48	1	48	1.32148e-06	0.0007691	3.66238e-05	1.36851e-06	8.84868	GO	GO:0005578	proteinaceous extracellular matrix
1_48	1	48	1.14012e-06	0.000663553	3.31776e-05	1.1786e-06	29.4157	GO	GO:0070469	respiratory chain
1_48	1	48	1.08714e-06	0.000632716	3.33008e-05	1.12184e-06	19.1267	GO	GO:0005518	collagen binding
1_48	1	48	9.4329e-07	0.000548995	3.22938e-05	9.69956e-07	197.352	GO	GO:1904237	positive regulation of substrate-dependent cell migration, cell attachment to substrate
1_48	1	48	6.51829e-07	0.000379364	2.5291e-05	6.67895e-07	15.0755	GO	GO:0005200	structural constituent of cytoskeleton
1_48	1	48	3.39008e-07	0.000197303	1.64419e-05	3.45539e-07	16.6624	GO	GO:0072562	blood microparticle
1_48	1	48	2.4591e-07	0.000143119	1.30109e-05	2.50209e-07	40.6531	GO	GO:0048146	positive regulation of fibroblast proliferation
1_48	1	48	2.31505e-07	0.000134736	1.34736e-05	2.35142e-07	13.5257	GO	GO:0030198	extracellular matrix organization
1_48	1	48	5.94157e-08	3.45799e-05	8.64498e-06	5.97236e-08	31.9247	GO	GO:0031093	platelet alpha granule lumen
1_48	1	48	5.18357e-08	3.01684e-05	1.00561e-05	5.20145e-08	4.73121	GO	GO:0005615	extracellular space
1_48	1	48	3.3777e-09	1.96582e-06	1.96582e-06	3.3777e-09	12.3028	GO	GO:0031012	extracellular matrix
10_87	10	87	0.000935181	1	0.0128354	0.00100768	16.5908	GO	GO:0008542	visual learning
10_87	10	87	0.000813026	0.892703	0.0114449	0.000874341	54.4518	GO	GO:0007176	regulation of epidermal growth factor-activated receptor activity
10_87	10	87	0.000813026	0.892703	0.0115935	0.000873486	54.4518	GO	GO:0007617	mating behavior
10_87	10	87	0.000781742	0.858353	0.0112941	0.000839054	17.6968	GO	GO:0040014	regulation of multicellular organism growth
10_87	10	87	0.000705944	0.775126	0.010335	0.000756959	58.9895	GO	GO:1904714	regulation of chaperone-mediated autophagy
10_87	10	87	0.000705944	0.775126	0.0104747	0.000756221	58.9895	GO	GO:0016199	axon midline choice point recognition
10_87	10	87	0.000637677	0.70017	0.00972458	0.000681762	4.37635	GO	GO:0031012	extracellular matrix
10_87	10	87	0.000620207	0.680987	0.00959136	0.000662438	10.8072	GO	GO:0007623	circadian rhythm
10_87	10	87	0.000606229	0.66564	0.00950914	0.00064688	64.3522	GO	GO:0086083	cell adhesive protein binding involved in bundle of His cell-Purkinje myocyte communication
10_87	10	87	0.000606229	0.66564	0.00964695	0.000646252	64.3522	GO	GO:0070083	clathrin-sculpted monoamine transport vesicle membrane
10_87	10	87	0.000606229	0.66564	0.00978882	0.000645625	64.3522	GO	GO:0008088	axo-dendritic transport
10_87	10	87	0.000606229	0.66564	0.00993492	0.000645	64.3522	GO	GO:0086073	bundle of His cell-Purkinje myocyte adhesion involved in cell communication
10_87	10	87	0.00060317	0.662281	0.0101889	0.000640504	10.8904	GO	GO:0030672	synaptic vesicle membrane
10_87	10	87	0.000513925	0.56429	0.00910145	0.000544156	70.7874	GO	GO:0050803	regulation of synapse structure or activity
10_87	10	87	0.000513925	0.56429	0.00925066	0.000543632	70.7874	GO	GO:0048669	collateral sprouting in absence of injury
10_87	10	87	0.000513925	0.56429	0.00940483	0.000543109	70.7874	GO	GO:0044327	dendritic spine head
10_87	10	87	0.000513925	0.56429	0.00956424	0.000542587	70.7874	GO	GO:0051425	PTB domain binding
10_87	10	87	0.000497584	0.546348	0.00958505	0.000524326	20.8198	GO	GO:0060076	excitatory synapse
10_87	10	87	0.000429075	0.471124	0.00872452	0.000450836	78.6526	GO	GO:0022010	central nervous system myelination
10_87	10	87	0.000361678	0.397122	0.00763697	0.000379295	12.5287	GO	GO:0031201	SNARE complex
10_87	10	87	0.000309408	0.33973	0.00707771	0.000323244	3.21311	GO	GO:0048471	perinuclear region of cytoplasm
10_87	10	87	0.000281904	0.309531	0.00658576	0.000294231	101.125	GO	GO:0043426	MRF binding
10_87	10	87	0.000230917	0.253547	0.00563437	0.000240557	14.1575	GO	GO:0000149	SNARE binding
10_87	10	87	0.000219296	0.240787	0.00547243	0.000228234	9.61785	GO	GO:0019905	syntaxin binding
10_87	10	87	0.000161536	0.177367	0.00454787	0.000167327	31.2297	GO	GO:0014003	oligodendrocyte development
10_87	10	87	0.000104207	0.11442	0.00309242	0.00010774	36.6142	GO	GO:0030056	hemidesmosome
10_87	10	87	0.000101325	0.111255	0.00309042	0.000104662	17.6968	GO	GO:0043195	terminal bouton
10_87	10	87	9.46367e-05	0.103911	0.00296889	9.76608e-05	37.9218	GO	GO:0006878	cellular copper ion homeostasis
10_87	10	87	9.46367e-05	0.103911	0.00305621	9.75691e-05	37.9218	GO	GO:0044306	neuron projection terminus
10_87	10	87	7.88966e-05	0.0866285	0.00270714	8.11889e-05	235.958	GO	GO:0070033	synaptobrevin 2-SNAP-25-syntaxin-1a-complexin II complex
10_87	10	87	6.85554e-05	0.0752738	0.00289515	7.01527e-05	3.76221	GO	GO:0045202	synapse
10_87	10	87	6.51256e-05	0.0715079	0.00286032	6.65809e-05	19.9401	GO	GO:0014047	glutamate secretion
10_87	10	87	6.17903e-05	0.0678458	0.00282691	6.31124e-05	20.225	GO	GO:0061621	canonical glycolysis
10_87	10	87	5.6266e-05	0.0617801	0.00268609	5.74164e-05	7.53057	GO	GO:0031982	vesicle
10_87	10	87	4.32455e-05	0.0474835	0.00215834	4.40887e-05	50.5624	GO	GO:0046914	transition metal ion binding
10_87	10	87	3.7098e-05	0.0407336	0.0019397	3.77863e-05	23.209	GO	GO:0017075	syntaxin-1 binding
10_87	10	87	1.91114e-05	0.0209843	0.00104921	1.94479e-05	27.7598	GO	GO:0005790	smooth endoplasmic reticulum
10_87	10	87	1.79201e-05	0.0196762	0.00103559	1.82187e-05	2.12166	GO	GO:0070062	extracellular exosome
10_87	10	87	1.30506e-05	0.0143296	0.000796087	1.32558e-05	30.7771	GO	GO:0031100	animal organ regeneration
10_87	10	87	1.29184e-05	0.0141844	0.000834377	1.31094e-05	12.4188	GO	GO:0043209	myelin sheath
10_87	10	87	2.64077e-06	0.00289957	0.000414224	2.65528e-06	151.687	GO	GO:0060203	clathrin-sculpted glutamate transport vesicle membrane
10_87	10	87	1.92002e-06	0.00210819	0.000702728	1.92353e-06	17.5506	GO	GO:1903561	extracellular vesicle
10_87	10	87	6.62724e-07	0.000727671	0.000363835	6.63328e-07	11.8473	GO	GO:0002576	platelet degranulation
11_41	11	41	0.000924169	0.536942	0.0335589	0.000948661	16.3618	GO	GO:0005201	extracellular matrix structural constituent
11_41	11	41	0.000774027	0.44971	0.0321221	0.000791743	2.64808	GO	GO:0005576	extracellular region
11_41	11	41	0.000699331	0.406312	0.0312547	0.00071408	18.0544	GO	GO:0005604	basement membrane
11_41	11	41	0.000418112	0.242923	0.0242923	0.000424691	21.6355	GO	GO:1903561	extracellular vesicle
11_41	11	41	0.000270899	0.157392	0.0174881	0.000274681	91.8559	GO	GO:0009650	UV protection
11_41	11	41	0.000246486	0.143208	0.0204583	0.000249058	7.11384	GO	GO:0005578	proteinaceous extracellular matrix
11_41	11	41	0.000160396	0.0931898	0.0155316	0.000161788	15.3768	GO	GO:0005518	collagen binding
11_41	11	41	0.000150044	0.0871754	0.0174351	0.000151084	15.6526	GO	GO:0005581	collagen trimer
11_41	11	41	1.07436e-05	0.00624204	0.00156051	1.07994e-05	2.9508	GO	GO:0070062	extracellular exosome
11_41	11	41	1.04472e-05	0.00606982	0.00202327	1.04833e-05	4.204	GO	GO:0005615	extracellular space
11_41	11	41	9.17034e-07	0.000532797	0.000266398	9.18615e-07	14.272	GO	GO:0030198	extracellular matrix organization
11_41	11	41	9.85014e-08	5.72293e-05	5.72293e-05	9.85014e-08	12.1386	GO	GO:0031012	extracellular matrix
12_34	12	34	0.000908999	0.459045	0.0286903	0.000936826	47.7216	GO	GO:0048147	negative regulation of fibroblast proliferation
12_34	12	34	0.000533367	0.26935	0.0244864	0.000544142	63.1609	GO	GO:0071549	cellular response to dexamethasone stimulus
12_34	12	34	0.000287263	0.145068	0.020724	0.000290717	24.5894	GO	GO:0008307	structural constituent of muscle
12_34	12	34	0.000282414	0.142619	0.0237699	0.000285239	5.7157	GO	GO:0003779	actin binding
12_34	12	34	0.000218497	0.110341	0.0275852	0.000219803	14.1281	GO	GO:0030018	Z disc
12_34	12	34	0.000100041	0.0505209	0.0168403	0.000100439	17.3884	GO	GO:0005178	integrin binding
12_34	12	34	6.69809e-05	0.0338253	0.0169127	6.71138e-05	195.225	GO	GO:0042743	hydrogen peroxide metabolic process
12_34	12	34	2.34315e-06	0.00118329	0.00118329	2.34315e-06	8.21038	GO	GO:0005925	focal adhesion
13_413	13	413	0.000936679	1	0.0267395	0.00097035	5.65654	GO	GO:0036464	cytoplasmic ribonucleoprotein granule
13_413	13	413	0.000830879	1	0.0246494	0.000859569	4.87332	GO	GO:0014070	response to organic cyclic compound
13_413	13	413	0.000791027	1	0.0236995	0.000818062	19.3938	GO	GO:0042448	progesterone metabolic process
13_413	13	413	0.000791027	1	0.0239365	0.000817782	19.3938	GO	GO:0060789	hair follicle placode formation
13_413	13	413	0.000705892	1	0.0217962	0.000729269	10.9703	GO	GO:2000811	negative regulation of anoikis
13_413	13	413	0.00068715	1	0.0216595	0.000709422	2.09501	GO	GO:0043066	negative regulation of apoptotic process
13_413	13	413	0.000646618	1	0.0210394	0.000666893	7.80212	GO	GO:0004602	glutathione peroxidase activity
13_413	13	413	0.000573417	1	0.0192796	0.000590794	2.35689	GO	GO:0098609	cell-cell adhesion
13_413	13	413	0.000569417	1	0.0193602	0.000586473	11.678	GO	GO:0071294	cellular response to zinc ion
13_413	13	413	0.00053801	1	0.0189304	0.000553559	22.6262	GO	GO:0050665	hydrogen peroxide biosynthetic process
13_413	13	413	0.000531062	1	0.0189058	0.000546225	2.06562	GO	GO:0009986	cell surface
13_413	13	413	0.000508737	1	0.0183266	0.000523084	12.0673	GO	GO:0045926	negative regulation of growth
13_413	13	413	0.000476695	1	0.0173793	0.000489973	1.65063	GO	GO:0005615	extracellular space
13_413	13	413	0.000406579	1	0.015189	0.00041762	8.70237	GO	GO:0030057	desmosome
13_413	13	413	0.000354276	1	0.0135701	0.00036365	13.4081	GO	GO:0009987	cellular process
13_413	13	413	0.00035233	1	0.0136686	0.000361529	1.70185	GO	GO:0044822	poly(A) RNA binding
13_413	13	413	0.000343755	1	0.0135091	0.000352611	27.1514	GO	GO:0044598	doxorubicin metabolic process
13_413	13	413	0.000343755	1	0.0136869	0.000352492	27.1514	GO	GO:0044597	daunorubicin metabolic process
13_413	13	413	0.000272112	0.823409	0.0115973	0.000278555	14.4807	GO	GO:0016342	catenin complex
13_413	13	413	0.000266601	0.806733	0.0115248	0.000272822	30.1682	GO	GO:0004032	alditol:NADP+ 1-oxidoreductase activity
13_413	13	413	0.000185419	0.561076	0.00876682	0.000189361	4.7634	GO	GO:0043209	myelin sheath
13_413	13	413	0.000147821	0.447306	0.00733289	0.000150811	38.7877	GO	GO:0097208	alveolar lamellar body
13_413	13	413	0.0001435	0.43423	0.00723717	0.000146353	3.17189	GO	GO:0030198	extracellular matrix organization
13_413	13	413	0.000138726	0.419785	0.007115	0.000141437	6.66876	GO	GO:0071944	cell periphery
13_413	13	413	0.000106891	0.323452	0.00577592	0.00010887	19.0536	GO	GO:0071681	cellular response to indole-3-methanol
13_413	13	413	9.45888e-05	0.286226	0.00520411	9.63075e-05	12.2304	GO	GO:0010952	positive regulation of peptidase activity
13_413	13	413	7.01241e-05	0.212195	0.00442074	7.12304e-05	54.3028	GO	GO:0071395	cellular response to jasmonic acid stimulus
13_413	13	413	7.01241e-05	0.212195	0.0045148	7.12065e-05	54.3028	GO	GO:0047115	trans-1,2-dihydrobenzene-1,2-diol dehydrogenase activity
13_413	13	413	6.29599e-05	0.190517	0.00414167	6.39103e-05	4.12949	GO	GO:0042470	melanosome
13_413	13	413	6.28738e-05	0.190256	0.00422791	6.38015e-05	7.63292	GO	GO:0000302	response to reactive oxygen species
13_413	13	413	6.19226e-05	0.187378	0.00425858	6.28152e-05	9.69692	GO	GO:0051591	response to cAMP
13_413	13	413	5.65881e-05	0.171236	0.00398223	5.73846e-05	5.61753	GO	GO:0005604	basement membrane
13_413	13	413	5.42292e-05	0.164098	0.00390708	5.49741e-05	3.90884	GO	GO:0006979	response to oxidative stress
13_413	13	413	5.41758e-05	0.163936	0.00399844	5.49016e-05	2.14885	GO	GO:0048471	perinuclear region of cytoplasm
13_413	13	413	4.41888e-05	0.133715	0.00371432	4.47059e-05	67.8785	GO	GO:0018636	phenanthrene 9,10-monooxygenase activity
13_413	13	413	4.41888e-05	0.133715	0.00382044	4.4691e-05	67.8785	GO	GO:0047086	ketosteroid monooxygenase activity
13_413	13	413	2.91208e-05	0.0881195	0.00275373	2.94222e-05	2.49095	GO	GO:0005913	cell-cell adherens junction
13_413	13	413	2.59952e-05	0.0786615	0.00280934	2.62293e-05	3.53189	GO	GO:0006413	translational initiation
13_413	13	413	2.53254e-05	0.0766346	0.00283832	2.55449e-05	7.3135	GO	GO:0022627	cytosolic small ribosomal subunit
13_413	13	413	1.76691e-05	0.0534668	0.00232464	1.77985e-05	32.9108	GO	GO:0004447	iodide peroxidase activity
13_413	13	413	1.09138e-05	0.0330251	0.00157262	1.09864e-05	4.59594	GO	GO:0019083	viral transcription
13_413	13	413	1.04228e-05	0.0315395	0.00157698	1.04887e-05	2.70785	GO	GO:0098641	cadherin binding involved in cell-cell adhesion
13_413	13	413	9.45024e-06	0.0285964	0.00150507	9.50679e-06	4.33926	GO	GO:0000184	nuclear-transcribed mRNA catabolic process, nonsense-mediated decay
13_413	13	413	7.08469e-06	0.0214383	0.00142922	7.11762e-06	5.75463	GO	GO:0022617	extracellular matrix disassembly
13_413	13	413	4.44583e-06	0.0134531	0.00103485	4.46353e-06	25.1402	GO	GO:0071276	cellular response to cadmium ion
13_413	13	413	1.75891e-06	0.00532246	0.000532246	1.76415e-06	19.3938	GO	GO:0042744	hydrogen peroxide catabolic process
13_413	13	413	1.04896e-06	0.00317415	0.000352683	1.05174e-06	5.76745	GO	GO:0098869	cellular oxidant detoxification
13_413	13	413	3.63346e-07	0.00109948	0.000157069	3.64067e-07	4.24589	GO	GO:0042493	response to drug
13_413	13	413	1.49074e-07	0.000451098	7.5183e-05	1.49321e-07	5.80158	GO	GO:0006614	SRP-dependent cotranslational protein targeting to membrane
13_413	13	413	8.56091e-08	0.000259053	5.18106e-05	8.57224e-08	10.9042	GO	GO:0004601	peroxidase activity
13_413	13	413	9.22727e-09	2.79217e-05	6.98043e-06	9.23643e-09	23.356	GO	GO:0006590	thyroid hormone generation
13_413	13	413	1.95458e-10	5.91457e-07	1.97152e-07	1.95587e-10	3.22956	GO	GO:0005925	focal adhesion
13_413	13	413	2.89646e-12	8.76469e-09	4.38235e-09	2.89742e-12	4.61615	GO	GO:0031012	extracellular matrix
13_413	13	413	2.71618e-20	8.21916e-17	8.21916e-17	2.71618e-20	2.26748	GO	GO:0070062	extracellular exosome
14_280	14	280	0.000983135	1	0.0420618	0.00100626	9.78533	GO	GO:0030057	desmosome
14_280	14	280	0.000918561	1	0.0428717	0.000938299	9.9772	GO	GO:0031527	filopodium membrane
14_280	14	280	0.00089359	1	0.0432801	0.000912066	63.6047	GO	GO:0046533	negative regulation of photoreceptor cell differentiation
14_280	14	280	0.00089359	1	0.0441124	0.000911704	63.6047	GO	GO:0061010	gall bladder development
14_280	14	280	0.00089359	1	0.0449774	0.000911341	63.6047	GO	GO:0061031	endodermal digestive tract morphogenesis
14_280	14	280	0.00089359	1	0.0458769	0.000910979	63.6047	GO	GO:0061009	common bile duct development
14_280	14	280	0.000808975	1	0.0441838	0.000823736	4.25805	GO	GO:0002576	platelet degranulation
14_280	14	280	0.000757915	1	0.0422949	0.000771438	3.86785	GO	GO:0051082	unfolded protein binding
14_280	14	280	0.00074618	1	0.0425654	0.000759193	3.30024	GO	GO:0006888	ER to Golgi vesicle-mediated transport
14_280	14	280	0.00065684	1	0.0383206	0.00066803	2.26967	GO	GO:0005925	focal adhesion
14_280	14	280	0.00065364	1	0.0390208	0.000664512	20.0857	GO	GO:0003215	cardiac right ventricle morphogenesis
14_280	14	280	0.00065364	1	0.0399499	0.000664249	20.0857	GO	GO:0005832	chaperonin-containing T-complex
14_280	14	280	0.000598833	1	0.0394155	0.000607831	84.8062	GO	GO:0001071	nucleic acid binding transcription factor activity
14_280	14	280	0.000598833	1	0.0404528	0.000607591	84.8062	GO	GO:0072017	distal tubule development
14_280	14	280	0.000567804	1	0.0404876	0.000575652	21.2016	GO	GO:1904871	positive regulation of protein localization to Cajal body
14_280	14	280	0.000426864	1	0.0332048	0.000432252	12.4107	GO	GO:0048568	embryonic organ development
14_280	14	280	0.000391334	1	0.0334852	0.000395806	12.7209	GO	GO:0043236	laminin binding
14_280	14	280	0.000351559	0.902452	0.031119	0.000355436	6.81479	GO	GO:0034097	response to cytokine
14_280	14	280	0.000265545	0.681655	0.0262175	0.000268157	7.20053	GO	GO:0030216	keratinocyte differentiation
14_280	14	280	0.000264416	0.678755	0.0271502	0.000266911	4.07722	GO	GO:0050821	protein stabilization
14_280	14	280	0.000238428	0.612045	0.0255019	0.000240584	6.01666	GO	GO:0033116	endoplasmic reticulum-Golgi intermediate compartment membrane
14_280	14	280	0.000216576	0.55595	0.0241717	0.000218448	4.18452	GO	GO:0072562	blood microparticle
14_280	14	280	0.000161874	0.41553	0.0197871	0.000163145	34.6935	GO	GO:0044798	nuclear transcription factor complex
14_280	14	280	0.000111669	0.286655	0.0179159	0.000112325	18.1728	GO	GO:0042744	hydrogen peroxide catabolic process
14_280	14	280	0.000101672	0.260992	0.0173995	0.00010223	11.7786	GO	GO:0050840	extracellular matrix binding
14_280	14	280	8.61665e-05	0.221189	0.0157992	8.6605e-05	19.5707	GO	GO:0031091	platelet alpha granule
14_280	14	280	8.61665e-05	0.221189	0.0170146	8.65711e-05	19.5707	GO	GO:0030663	COPI-coated vesicle membrane
14_280	14	280	7.51431e-05	0.192892	0.0160744	7.54665e-05	20.3535	GO	GO:0048711	positive regulation of astrocyte differentiation
14_280	14	280	5.76907e-05	0.148092	0.0148092	5.78937e-05	3.86383	GO	GO:0030198	extracellular matrix organization
14_280	14	280	4.57929e-05	0.11755	0.0146938	4.59181e-05	7.95058	GO	GO:0021762	substantia nigra development
14_280	14	280	2.1205e-05	0.0544332	0.0090722	2.12464e-05	5.60394	GO	GO:0005518	collagen binding
14_280	14	280	1.20978e-05	0.0310551	0.00621103	1.21167e-05	3.28394	GO	GO:0005578	proteinaceous extracellular matrix
14_280	14	280	3.17242e-06	0.00814359	0.0020359	3.17613e-06	2.10119	GO	GO:0005615	extracellular space
14_280	14	280	1.29316e-07	0.000331955	0.000110652	1.29417e-07	4.1289	GO	GO:0031012	extracellular matrix
14_280	14	280	2.99159e-08	7.6794e-05	3.8397e-05	2.99275e-08	8.92697	GO	GO:0043209	myelin sheath
14_280	14	280	5.96256e-11	1.53059e-07	1.53059e-07	5.96256e-11	2.03347	GO	GO:0070062	extracellular exosome
15_209	15	209	0.000925985	1	0.0288842	0.000956098	1.49353	GO	GO:0005829	cytosol
15_209	15	209	0.000829634	1	0.0263409	0.000856117	10.1344	GO	GO:0014047	glutamate secretion
15_209	15	209	0.000697879	1	0.02433	0.000718072	7.49522	GO	GO:0015991	ATP hydrolysis coupled proton transport
15_209	15	209	0.000629953	1	0.023831	0.000646684	71.9541	GO	GO:0060201	clathrin-sculpted acetylcholine transport vesicle membrane
15_209	15	209	0.000629953	1	0.0243491	0.000646311	71.9541	GO	GO:0070314	G1 to G0 transition
15_209	15	209	0.000525794	0.934862	0.0228015	0.000537896	3.04493	GO	GO:0098609	cell-cell adhesion
15_209	15	209	0.000289678	0.515048	0.0171683	0.000294481	3.69858	GO	GO:0005516	calmodulin binding
15_209	15	209	0.000275262	0.489417	0.0168764	0.000279667	26.9828	GO	GO:0001504	neurotransmitter uptake
15_209	15	209	0.00024639	0.438082	0.0162253	0.000250047	7.2437	GO	GO:0007269	neurotransmitter secretion
15_209	15	209	0.000240349	0.427341	0.0164362	0.000243777	28.4029	GO	GO:0043229	intracellular organelle
15_209	15	209	0.000207511	0.368955	0.0153731	0.000210231	9.88381	GO	GO:0017157	regulation of exocytosis
15_209	15	209	0.000192149	0.341641	0.0148539	0.000194556	2.93391	GO	GO:0005913	cell-cell adherens junction
15_209	15	209	0.000181988	0.323574	0.0147079	0.000184163	179.885	GO	GO:0032328	alanine transport
15_209	15	209	0.000178866	0.318025	0.015144	0.000180901	10.2208	GO	GO:0046034	ATP metabolic process
15_209	15	209	0.000153119	0.272246	0.0151248	0.000154597	33.7285	GO	GO:0031045	dense core granule
15_209	15	209	0.000121175	0.21545	0.0126735	0.000122276	8.3024	GO	GO:0030672	synaptic vesicle membrane
15_209	15	209	7.9319e-05	0.141029	0.00881432	7.99938e-05	4.73382	GO	GO:0014069	postsynaptic density
15_209	15	209	4.97175e-05	0.0883976	0.00679982	5.00553e-05	3.31204	GO	GO:0098641	cadherin binding involved in cell-cell adhesion
15_209	15	209	3.40664e-05	0.06057	0.00550636	3.4259e-05	4.05991	GO	GO:0030424	axon
15_209	15	209	3.35821e-05	0.0597089	0.00597089	3.37529e-05	24.8118	GO	GO:2000300	regulation of synaptic vesicle exocytosis
15_209	15	209	1.80292e-05	0.0320559	0.00356177	1.81107e-05	2.45375	GO	GO:0030054	cell junction
15_209	15	209	9.1666e-06	0.0162982	0.00232832	9.19764e-06	13.4914	GO	GO:0043195	terminal bouton
15_209	15	209	8.6709e-06	0.0154169	0.00256948	8.69535e-06	6.20294	GO	GO:0030426	growth cone
15_209	15	209	3.83433e-07	0.000681744	0.000136349	3.84297e-07	1.93544	GO	GO:0070062	extracellular exosome
15_209	15	209	2.66769e-07	0.000474315	0.000118579	2.6722e-07	4.7782	GO	GO:0043005	neuron projection
15_209	15	209	2.57561e-07	0.000457944	0.000152648	2.57851e-07	3.53005	GO	GO:0045202	synapse
15_209	15	209	1.8241e-08	3.24325e-05	1.62162e-05	1.82513e-08	9.26448	GO	GO:0008021	synaptic vesicle
15_209	15	209	8.199e-09	1.45778e-05	1.45778e-05	8.199e-09	11.5716	GO	GO:0043209	myelin sheath
16_119	16	119	0.000952028	1	0.0331745	0.000979414	50.6814	GO	GO:0036021	endolysosome lumen
16_119	16	119	0.000823301	1	0.0329078	0.00084379	4.79419	GO	GO:0030335	positive regulation of cell migration
16_119	16	119	0.000766872	1	0.0325681	0.000784773	10.2215	GO	GO:0048812	neuron projection morphogenesis
16_119	16	119	0.000732511	0.995483	0.0331828	0.000748483	4.89338	GO	GO:0045121	membrane raft
16_119	16	119	0.000722933	0.982467	0.0350881	0.000737588	4.90465	GO	GO:0030027	lamellipodium
16_119	16	119	0.000707665	0.961717	0.0356192	0.000721468	3.10031	GO	GO:0005925	focal adhesion
16_119	16	119	0.000667528	0.90717	0.0362868	0.000679528	4.97341	GO	GO:0030198	extracellular matrix organization
16_119	16	119	0.000579177	0.787101	0.0327959	0.000589148	67.5752	GO	GO:0043203	axon hillock
16_119	16	119	0.000578998	0.786859	0.0342112	0.000588525	19.8319	GO	GO:0010765	positive regulation of sodium ion transport
16_119	16	119	0.00049269	0.669566	0.0334783	0.000499676	3.72658	GO	GO:0005764	lysosome
16_119	16	119	0.000393555	0.534841	0.0297134	0.00039854	22.8066	GO	GO:0043236	laminin binding
16_119	16	119	0.000383578	0.521283	0.0306637	0.000388148	4.22998	GO	GO:0031012	extracellular matrix
16_119	16	119	0.000223079	0.303164	0.0189478	0.000225569	121.635	GO	GO:0097581	lamellipodium organization
16_119	16	119	0.000157904	0.214592	0.0143061	0.000159548	2.40676	GO	GO:0005615	extracellular space
16_119	16	119	0.000133655	0.181637	0.0129741	0.000134946	33.7876	GO	GO:0043394	proteoglycan binding
16_119	16	119	0.000128392	0.174484	0.0145404	0.00012944	10.8603	GO	GO:0030574	collagen catabolic process
16_119	16	119	0.000108375	0.147282	0.0133893	0.000109179	36.4906	GO	GO:0032839	dendrite cytoplasm
16_119	16	119	2.54503e-05	0.034587	0.00864675	2.55066e-05	25.8799	GO	GO:0030863	cortical cytoskeleton
16_119	16	119	2.31102e-05	0.0314067	0.0104689	2.31442e-05	65.1618	GO	GO:0010447	response to acidic pH
16_119	16	119	1.09762e-06	0.00149166	0.000745831	1.09843e-06	2.19677	GO	GO:0070062	extracellular exosome
16_119	16	119	3.27095e-07	0.000444522	0.000444522	3.27095e-07	40.0117	GO	GO:0001968	fibronectin binding
17_80	17	80	0.000748437	0.711015	0.0790016	0.000754793	17.8166	GO	GO:0034446	substrate adhesion-dependent cell spreading
17_80	17	80	0.000559206	0.531246	0.0664057	0.000563357	64.9317	GO	GO:0045124	regulation of bone resorption
17_80	17	80	0.000539742	0.512755	0.0732507	0.000543173	4.4832	GO	GO:0098641	cadherin binding involved in cell-cell adhesion
17_80	17	80	0.000406817	0.386476	0.0644127	0.00040897	22.1358	GO	GO:0006612	protein targeting to membrane
17_80	17	80	0.000255347	0.24258	0.048516	0.000256427	9.25832	GO	GO:0042470	melanosome
17_80	17	80	0.00025416	0.241452	0.060363	0.000254965	4.46778	GO	GO:0005913	cell-cell adherens junction
17_80	17	80	4.31374e-05	0.0409805	0.0136602	4.32284e-05	7.83658	GO	GO:0045121	membrane raft
17_80	17	80	3.11266e-05	0.0295702	0.0147851	3.11594e-05	14.6683	GO	GO:0071456	cellular response to hypoxia
17_80	17	80	1.9869e-07	0.000188756	0.000188756	1.9869e-07	2.69468	GO	GO:0070062	extracellular exosome
18_2101	18	2101	0.000998028	1	0.0818383	0.00101021	3.13239	GO	GO:0005852	eukaryotic translation initiation factor 3 complex
18_2101	18	2101	0.000949239	1	0.0787427	0.000960686	6.26477	GO	GO:0075522	IRES-dependent viral translational initiation
18_2101	18	2101	0.000934734	1	0.0784516	0.000945871	3.99879	GO	GO:0042776	mitochondrial ATP synthesis coupled proton transport
18_2101	18	2101	0.00090241	1	0.0766404	0.000913033	5.22064	GO	GO:0033280	response to vitamin D
18_2101	18	2101	0.000824671	1	0.0717464	0.000834142	1.83359	GO	GO:0006413	translational initiation
18_2101	18	2101	0.00075138	1	0.0670043	0.000759794	5.414	GO	GO:0031489	myosin V binding
18_2101	18	2101	0.000664201	1	0.0623475	0.000671258	1.58635	GO	GO:0008283	cell proliferation
18_2101	18	2101	0.000623463	1	0.0593038	0.000629998	3.86714	GO	GO:0005753	mitochondrial proton-transporting ATP synthase complex
18_2101	18	2101	0.000621119	1	0.0598793	0.000627541	2.12089	GO	GO:0001701	in utero embryonic development
18_2101	18	2101	0.000603876	1	0.059834	0.000609946	2.29708	GO	GO:0030133	transport vesicle
18_2101	18	2101	0.000595646	1	0.0598498	0.000601548	2.41417	GO	GO:0000502	proteasome complex
18_2101	18	2101	0.000586569	1	0.0597798	0.000592298	1.55805	GO	GO:0019901	protein kinase binding
18_2101	18	2101	0.000574359	1	0.0593838	0.000579887	2.06612	GO	GO:0002223	stimulatory C-type lectin receptor signaling pathway
18_2101	18	2101	0.000569269	1	0.059723	0.000574666	9.49208	GO	GO:0032930	positive regulation of superoxide anion generation
18_2101	18	2101	0.000556823	1	0.0601876	0.000561944	2.76133	GO	GO:1903561	extracellular vesicle
18_2101	18	2101	0.00054613	1	0.0599399	0.000551074	2.07345	GO	GO:0043488	regulation of mRNA stability
18_2101	18	2101	0.000533445	1	0.0604063	0.000538121	1.53737	GO	GO:0008284	positive regulation of cell proliferation
18_2101	18	2101	0.000526871	1	0.0606242	0.000531415	3.64616	GO	GO:0002102	podosome
18_2101	18	2101	0.000514441	1	0.0611671	0.000518731	2.38334	GO	GO:0071013	catalytic step 2 spliceosome
18_2101	18	2101	0.000468201	1	0.0575887	0.000471972	5.06244	GO	GO:0043548	phosphatidylinositol 3-kinase binding
18_2101	18	2101	0.000466371	1	0.0583701	0.000470061	1.12613	GO	GO:0005515	protein binding
18_2101	18	2101	0.000425416	1	0.0541949	0.000428721	2.14384	GO	GO:0042470	melanosome
18_2101	18	2101	0.000412222	1	0.0534689	0.000415366	2.64709	GO	GO:0042060	wound healing
18_2101	18	2101	0.00040759	1	0.0538471	0.00041064	1.91291	GO	GO:0005788	endoplasmic reticulum lumen
18_2101	18	2101	0.000381891	1	0.0534198	0.000384587	3.14361	GO	GO:0045600	positive regulation of fat cell differentiation
18_2101	18	2101	0.00037031	1	0.0528358	0.000372871	2.44991	GO	GO:0008286	insulin receptor signaling pathway
18_2101	18	2101	0.000365111	1	0.0531572	0.000367584	2.59326	GO	GO:0034976	response to endoplasmic reticulum stress
18_2101	18	2101	0.000346943	1	0.0526615	0.000349195	3.57987	GO	GO:0006754	ATP biosynthetic process
18_2101	18	2101	0.000333771	1	0.0529138	0.000335842	6.35557	GO	GO:1901673	regulation of mitotic spindle assembly
18_2101	18	2101	0.000285435	1	0.0473557	0.000287126	1.80368	GO	GO:0005769	early endosome
18_2101	18	2101	0.000272348	1	0.0473886	0.000273884	8.35303	GO	GO:0008121	ubiquinol-cytochrome-c reductase activity
18_2101	18	2101	0.000210361	1	0.0384799	0.000211488	6.96086	GO	GO:0006119	oxidative phosphorylation
18_2101	18	2101	0.000198222	1	0.0372136	0.000199256	2.73634	GO	GO:0005604	basement membrane
18_2101	18	2101	0.000156445	1	0.0310022	0.000157216	2.89143	GO	GO:0014070	response to organic cyclic compound
18_2101	18	2101	0.000118334	0.844191	0.027232	0.000118833	6.42541	GO	GO:0006122	mitochondrial electron transport, ubiquinol to cytochrome c
18_2101	18	2101	0.000112535	0.802823	0.0267608	0.000112994	2.62524	GO	GO:0002479	antigen processing and presentation of exogenous peptide antigen via MHC class I, TAP-dependent
18_2101	18	2101	9.52409e-05	0.679448	0.0234293	9.56161e-05	3.65445	GO	GO:0031252	cell leading edge
18_2101	18	2101	8.31465e-05	0.593167	0.0219692	8.34506e-05	2.68665	GO	GO:0043209	myelin sheath
18_2101	18	2101	7.72502e-05	0.551103	0.0211963	7.75218e-05	2.50992	GO	GO:0060071	Wnt signaling pathway, planar cell polarity pathway
18_2101	18	2101	7.0942e-05	0.5061	0.020244	7.11814e-05	2.58341	GO	GO:0003743	translation initiation factor activity
18_2101	18	2101	4.64342e-05	0.331262	0.0138026	4.65844e-05	2.00435	GO	GO:0016477	cell migration
18_2101	18	2101	4.63904e-05	0.330949	0.0143891	4.65339e-05	2.0434	GO	GO:0005911	cell-cell junction
18_2101	18	2101	4.43799e-05	0.316606	0.0143912	4.4511e-05	1.20624	GO	GO:0005829	cytosol
18_2101	18	2101	4.19119e-05	0.298999	0.0142381	4.20297e-05	3.55448	GO	GO:0071230	cellular response to amino acid stimulus
18_2101	18	2101	4.01276e-05	0.28627	0.0143135	4.02347e-05	1.33241	GO	GO:0005783	endoplasmic reticulum
18_2101	18	2101	1.75611e-05	0.125281	0.00659373	1.76055e-05	1.56036	GO	GO:0048471	perinuclear region of cytoplasm
18_2101	18	2101	1.29019e-05	0.0920425	0.00511347	1.29328e-05	5.88996	GO	GO:0033290	eukaryotic 48S preinitiation complex
18_2101	18	2101	1.21885e-05	0.0869525	0.00511485	1.22159e-05	3.45016	GO	GO:0006521	regulation of cellular amino acid metabolic process
18_2101	18	2101	1.04975e-05	0.074889	0.00468056	1.05196e-05	6.04496	GO	GO:0016282	eukaryotic 43S preinitiation complex
18_2101	18	2101	7.05445e-06	0.0503264	0.0033551	7.06832e-06	1.64908	GO	GO:0016032	viral process
18_2101	18	2101	5.94369e-06	0.0424023	0.00302874	5.95454e-06	3.37334	GO	GO:0036498	IRE1-mediated unfolded protein response
18_2101	18	2101	4.97809e-06	0.0355137	0.00273182	4.98648e-06	1.82951	GO	GO:0019899	enzyme binding
18_2101	18	2101	4.12051e-06	0.0293957	0.00244964	4.12688e-06	2.61032	GO	GO:0001501	skeletal system development
18_2101	18	2101	3.79421e-06	0.0270679	0.00246072	3.79954e-06	1.67696	GO	GO:0009986	cell surface
18_2101	18	2101	1.26384e-06	0.00901623	0.000901623	1.26544e-06	2.00111	GO	GO:0031012	extracellular matrix
18_2101	18	2101	2.93241e-07	0.00209198	0.000232442	2.9357e-07	4.17651	GO	GO:0006446	regulation of translational initiation
18_2101	18	2101	2.83513e-07	0.00202258	0.000252822	2.83791e-07	6.02382	GO	GO:0001731	formation of translation preinitiation complex
18_2101	18	2101	1.64215e-07	0.00117151	0.000167359	1.64353e-07	2.39076	GO	GO:0030198	extracellular matrix organization
18_2101	18	2101	1.93239e-09	1.37857e-05	2.29761e-06	1.93375e-09	1.91616	GO	GO:0005925	focal adhesion
18_2101	18	2101	2.11656e-12	1.50995e-08	3.0199e-09	2.11775e-12	1.69637	GO	GO:0044822	poly(A) RNA binding
18_2101	18	2101	1.26418e-12	9.01869e-09	2.25467e-09	1.26472e-12	2.41999	GO	GO:0098609	cell-cell adhesion
18_2101	18	2101	2.48993e-13	1.77632e-09	5.92107e-10	2.49063e-13	2.27771	GO	GO:0005913	cell-cell adherens junction
18_2101	18	2101	1.85359e-13	1.32235e-09	6.61176e-10	1.85385e-13	2.37903	GO	GO:0098641	cadherin binding involved in cell-cell adhesion
18_2101	18	2101	9.51913e-31	6.79095e-27	6.79095e-27	9.51913e-31	1.73647	GO	GO:0070062	extracellular exosome
2_57	2	57	0.000927054	0.762039	0.0143781	0.000989661	16.4685	GO	GO:0022627	cytosolic small ribosomal subunit
2_57	2	57	0.000751369	0.617625	0.013141	0.000795909	4.85232	GO	GO:0005840	ribosome
2_57	2	57	0.000626576	0.515046	0.0111966	0.000662864	60.3844	GO	GO:0034663	endoplasmic reticulum chaperone complex
2_57	2	57	0.000530043	0.435696	0.00968212	0.00056002	5.15477	GO	GO:0003735	structural constituent of ribosome
2_57	2	57	0.000442792	0.363975	0.00887744	0.000465441	4.62027	GO	GO:0030529	intracellular ribonucleoprotein complex
2_57	2	57	0.000439628	0.361374	0.00903436	0.000461525	4.13452	GO	GO:0009986	cell surface
2_57	2	57	0.000348386	0.286373	0.0073429	0.000365272	83.6092	GO	GO:0042270	protection from natural killer cell mediated cytotoxicity
2_57	2	57	0.000333408	0.274061	0.00721214	0.000349123	12.7125	GO	GO:0043209	myelin sheath
2_57	2	57	0.000244697	0.201141	0.00558724	0.000255579	5.87978	GO	GO:0031012	extracellular matrix
2_57	2	57	0.000190312	0.156436	0.00446961	0.000198523	14.788	GO	GO:0022625	cytosolic large ribosomal subunit
2_57	2	57	0.000127424	0.104742	0.00308065	0.000132753	16.4685	GO	GO:0071556	integral component of lumenal side of endoplasmic reticulum membrane
2_57	2	57	9.37009e-05	0.0770221	0.002334	9.74963e-05	181.153	GO	GO:0051208	sequestering of calcium ion
2_57	2	57	6.25616e-05	0.0514257	0.00165889	6.49314e-05	42.9047	GO	GO:0071310	cellular response to organic substance
2_57	2	57	4.54089e-05	0.0373261	0.00138245	4.68921e-05	7.76371	GO	GO:0006364	rRNA processing
2_57	2	57	3.86208e-05	0.0317463	0.00122101	3.98322e-05	22.6442	GO	GO:0036464	cytoplasmic ribonucleoprotein granule
2_57	2	57	2.18006e-05	0.0179201	0.000716803	2.24562e-05	62.7069	GO	GO:0071682	endocytic vesicle lumen
2_57	2	57	1.74069e-05	0.0143085	0.000596186	1.7908e-05	5.07906	GO	GO:0005925	focal adhesion
2_57	2	57	1.21588e-05	0.00999453	0.00047593	1.2462e-05	77.6371	GO	GO:0034975	protein folding in endoplasmic reticulum
2_57	2	57	1.21588e-05	0.00999453	0.000499727	1.24465e-05	77.6371	GO	GO:0036500	ATF6-mediated unfolded protein response
2_57	2	57	1.11509e-05	0.00916602	0.000482422	1.14005e-05	31.5049	GO	GO:0005844	polysome
2_57	2	57	1.41394e-06	0.00116226	0.000116226	1.42959e-06	10.6041	GO	GO:0006413	translational initiation
2_57	2	57	7.36059e-07	0.000605041	7.56301e-05	7.42381e-07	14.8602	GO	GO:0019083	viral transcription
2_57	2	57	4.10507e-07	0.000337437	5.62394e-05	4.13019e-07	16.2573	GO	GO:0006614	SRP-dependent cotranslational protein targeting to membrane
2_57	2	57	1.17238e-07	9.63696e-05	4.81848e-05	1.17381e-07	14.8893	GO	GO:0000184	nuclear-transcribed mRNA catabolic process, nonsense-mediated decay
2_57	2	57	4.32333e-08	3.55377e-05	3.55377e-05	4.32333e-08	2.92362	GO	GO:0070062	extracellular exosome
3_55	3	55	0.000536423	0.363695	0.0072739	0.000578211	19.9337	GO	GO:0036464	cytoplasmic ribonucleoprotein granule
3_55	3	55	0.000448807	0.304291	0.00647428	0.000481474	11.7042	GO	GO:0002020	protease binding
3_55	3	55	0.000432995	0.293571	0.00638197	0.000463777	21.5016	GO	GO:0006953	acute-phase response
3_55	3	55	0.000411266	0.278838	0.0061964	0.000439808	75.0447	GO	GO:0016460	myosin II complex
3_55	3	55	0.000293741	0.199156	0.00463154	0.000313139	5.69536	GO	GO:0005840	ribosome
3_55	3	55	0.000279648	0.189602	0.00462443	0.000297181	3.07306	GO	GO:0005615	extracellular space
3_55	3	55	0.000219248	0.14865	0.00391184	0.000231903	27.3377	GO	GO:0061621	canonical glycolysis
3_55	3	55	0.000205052	0.139025	0.00375744	0.00021655	6.05035	GO	GO:0003735	structural constituent of ribosome
3_55	3	55	0.000114812	0.0778427	0.00235887	0.0001205	3.35853	GO	GO:0044822	poly(A) RNA binding
3_55	3	55	3.47578e-05	0.0235658	0.0010246	3.59235e-05	23.1956	GO	GO:0070527	platelet aggregation
3_55	3	55	3.40137e-05	0.0230613	0.00104824	3.51009e-05	5.85211	GO	GO:0005913	cell-cell adherens junction
3_55	3	55	2.47601e-05	0.0167873	0.000883545	2.54354e-05	6.10087	GO	GO:0030529	intracellular ribonucleoprotein complex
3_55	3	55	2.33465e-05	0.0158289	0.000879384	2.39469e-05	25.7729	GO	GO:0022627	cytosolic small ribosomal subunit
3_55	3	55	1.65918e-05	0.0112493	0.000703078	1.69672e-05	9.11257	GO	GO:0006364	rRNA processing
3_55	3	55	1.34129e-05	0.00909393	0.000649567	1.36751e-05	6.60635	GO	GO:0098641	cadherin binding involved in cell-cell adhesion
3_55	3	55	1.16441e-05	0.00789472	0.000657893	1.18362e-05	7.88723	GO	GO:0031012	extracellular matrix
3_55	3	55	3.37765e-06	0.00229005	0.000286256	3.41289e-06	23.4515	GO	GO:0031093	platelet alpha granule lumen
3_55	3	55	6.041e-07	0.00040958	5.85114e-05	6.09494e-07	6.50345	GO	GO:0005925	focal adhesion
3_55	3	55	4.32559e-07	0.000293275	4.88792e-05	4.35773e-07	12.4464	GO	GO:0006413	translational initiation
3_55	3	55	2.54648e-07	0.000172651	3.45302e-05	2.56159e-07	17.442	GO	GO:0019083	viral transcription
3_55	3	55	1.62318e-07	0.000110052	2.75129e-05	1.63039e-07	18.6827	GO	GO:0002576	platelet degranulation
3_55	3	55	1.41287e-07	9.57925e-05	3.19308e-05	1.41705e-07	19.0819	GO	GO:0006614	SRP-dependent cotranslational protein targeting to membrane
3_55	3	55	3.48714e-08	2.36428e-05	1.18214e-05	3.4923e-08	17.4762	GO	GO:0000184	nuclear-transcribed mRNA catabolic process, nonsense-mediated decay
3_55	3	55	3.2986e-08	2.23645e-05	2.23645e-05	3.2986e-08	3.13744	GO	GO:0070062	extracellular exosome
4_22	4	22	0.000998421	0.346452	0.00692904	0.00116259	45.1152	GO	GO:0002181	cytoplasmic translation
4_22	4	22	0.000708185	0.24574	0.00534218	0.000813709	7.31144	GO	GO:0030529	intracellular ribonucleoprotein complex
4_22	4	22	0.000575363	0.199651	0.00475359	0.000652454	7.66155	GO	GO:0019901	protein kinase binding
4_22	4	22	0.000466099	0.161736	0.00414709	0.000523419	67.1226	GO	GO:0051020	GTPase binding
4_22	4	22	0.000312952	0.108594	0.00319395	0.000345842	8.7756	GO	GO:0005840	ribosome
4_22	4	22	0.000261493	0.0907379	0.00274963	0.000288057	7.01451	GO	GO:0005925	focal adhesion
4_22	4	22	0.000237974	0.082577	0.00258053	0.00026132	9.32259	GO	GO:0003735	structural constituent of ribosome
4_22	4	22	0.000225943	0.0784022	0.0025291	0.000247326	98.2867	GO	GO:2001234	negative regulation of apoptotic signaling pathway
4_22	4	22	0.000179942	0.0624399	0.0021531	0.000195736	4.65744	GO	GO:0044822	poly(A) RNA binding
4_22	4	22	0.000148562	0.0515511	0.00184111	0.000161097	30.8063	GO	GO:0006986	response to unfolded protein
4_22	4	22	9.9105e-05	0.0343894	0.00132267	0.000106799	8.41599	GO	GO:0005913	cell-cell adherens junction
4_22	4	22	5.14067e-05	0.0178381	0.000849435	5.45509e-05	9.50067	GO	GO:0098641	cadherin binding involved in cell-cell adhesion
4_22	4	22	3.59452e-05	0.012473	0.000733705	3.76827e-05	14.041	GO	GO:0006364	rRNA processing
4_22	4	22	1.55542e-05	0.00539731	0.000599701	1.59213e-05	16.7807	GO	GO:0006413	translational initiation
4_22	4	22	8.83977e-06	0.0030674	0.000383425	9.02176e-06	3.59549	GO	GO:0070062	extracellular exosome
4_22	4	22	5.26337e-06	0.00182639	0.000260913	5.35598e-06	37.4426	GO	GO:0022625	cytosolic large ribosomal subunit
4_22	4	22	5.25708e-06	0.00182421	0.000304034	5.33394e-06	917.343	GO	GO:0008426	protein kinase C inhibitor activity
4_22	4	22	3.10294e-06	0.00107672	0.000215344	3.13912e-06	23.5619	GO	GO:0000184	nuclear-transcribed mRNA catabolic process, nonsense-mediated decay
4_22	4	22	2.05969e-06	0.000714712	0.000178678	2.07765e-06	12.5418	GO	GO:0098609	cell-cell adhesion
4_22	4	22	1.65385e-06	0.000573885	0.000191295	1.66343e-06	26.8753	GO	GO:0019083	viral transcription
4_22	4	22	1.07508e-06	0.000373054	0.000186527	1.07819e-06	29.402	GO	GO:0006614	SRP-dependent cotranslational protein targeting to membrane
5_22	5	22	0.00099984	0.439929	0.0146643	0.00107039	15.8488	GO	GO:0002576	platelet degranulation
5_22	5	22	0.000879521	0.386989	0.0168256	0.000925812	2.71698	GO	GO:0070062	extracellular exosome
5_22	5	22	0.000769993	0.338797	0.0169399	0.000804743	17.3755	GO	GO:0002020	protease binding
5_22	5	22	0.000471267	0.207358	0.0121975	0.000489051	11.4783	GO	GO:0016323	basolateral plasma membrane
5_22	5	22	0.000454417	0.199944	0.0124965	0.000470456	68.2496	GO	GO:0006833	water transport
5_22	5	22	0.000324817	0.142919	0.0102085	0.000334706	81.4592	GO	GO:0015250	water channel activity
5_22	5	22	0.000216611	0.0953088	0.0105899	0.000220622	101.009	GO	GO:0032516	positive regulation of phosphoprotein phosphatase activity
5_22	5	22	0.000170595	0.0750618	0.00938273	0.000173353	114.783	GO	GO:0009992	cellular water homeostasis
5_22	5	22	0.000170595	0.0750618	0.0107231	0.000172954	114.783	GO	GO:0015793	glycerol transport
5_22	5	22	0.000159066	0.0699892	0.0116649	0.000160895	15.351	GO	GO:0031982	vesicle
5_22	5	22	0.000156461	0.0688428	0.0137686	0.000157896	120.249	GO	GO:0015254	glycerol channel activity
6_73	6	73	0.000946727	0.832173	0.0145995	0.00101115	48.7867	GO	GO:0045657	positive regulation of monocyte differentiation
6_73	6	73	0.000946727	0.832173	0.0148602	0.00100992	48.7867	GO	GO:0036376	sodium ion export from cell
6_73	6	73	0.000857788	0.753996	0.0142263	0.000911724	51.4971	GO	GO:0061158	3'-UTR-mediated mRNA destabilization
6_73	6	73	0.000692724	0.608905	0.0121781	0.00073362	57.9343	GO	GO:2001202	negative regulation of transforming growth factor-beta secretion
6_73	6	73	0.000477444	0.419674	0.0087432	0.000504415	71.3037	GO	GO:0042985	negative regulation of amyloid precursor protein biosynthetic process
6_73	6	73	0.00044973	0.395313	0.00859376	0.000473996	21.3911	GO	GO:0035987	endodermal cell differentiation
6_73	6	73	0.000414378	0.364238	0.00827814	0.000435692	77.2457	GO	GO:0070180	large ribosomal subunit rRNA binding
6_73	6	73	0.000376288	0.330757	0.00769202	0.00039517	22.7938	GO	GO:0002181	cytoplasmic translation
6_73	6	73	0.00035569	0.312652	0.00744409	0.000373093	84.268	GO	GO:1904237	positive regulation of substrate-dependent cell migration, cell attachment to substrate
6_73	6	73	0.0003014	0.26493	0.00679309	0.000315018	92.6948	GO	GO:0072289	metanephric nephron tubule formation
6_73	6	73	0.000134854	0.118536	0.00311938	0.00014078	2.13714	GO	GO:0070062	extracellular exosome
6_73	6	73	0.00012239	0.107581	0.00298836	0.000127466	16.7018	GO	GO:0019843	rRNA binding
6_73	6	73	0.000107407	0.0944108	0.00269745	0.000111729	35.6519	GO	GO:0005577	fibrinogen complex
6_73	6	73	4.28055e-05	0.037626	0.00121374	4.43181e-05	49.6579	GO	GO:0000027	ribosomal large subunit assembly
6_73	6	73	3.03433e-05	0.0266718	0.000889059	3.13785e-05	10.5736	GO	GO:0042470	melanosome
6_73	6	73	1.49523e-05	0.0131431	0.000453209	1.54443e-05	4.72531	GO	GO:0005925	focal adhesion
6_73	6	73	1.2871e-05	0.0113136	0.000404056	1.32788e-05	77.2457	GO	GO:0016504	peptidase activator activity
6_73	6	73	9.48066e-06	0.0083335	0.000308648	9.76963e-06	3.31177	GO	GO:0044822	poly(A) RNA binding
6_73	6	73	3.21657e-06	0.00282736	0.000108745	3.31073e-06	15.8905	GO	GO:0009611	response to wounding
6_73	6	73	2.03479e-06	0.00178858	7.15433e-05	2.09191e-06	50.1053	GO	GO:0010952	positive regulation of peptidase activity
6_73	6	73	5.12439e-07	0.000450434	1.87681e-05	5.26208e-07	5.51755	GO	GO:0006412	translation
6_73	6	73	3.38269e-08	2.97339e-05	1.29278e-06	3.46953e-08	8.59612	GO	GO:0031012	extracellular matrix
6_73	6	73	1.65645e-08	1.45602e-05	6.61829e-07	1.697e-08	8.16418	GO	GO:0003735	structural constituent of ribosome
6_73	6	73	3.98351e-09	3.5015e-06	1.66738e-07	4.07626e-09	8.27632	GO	GO:0005840	ribosome
6_73	6	73	1.70258e-09	1.49657e-06	7.87669e-08	1.73818e-09	11.3504	GO	GO:0006364	rRNA processing
6_73	6	73	6.29045e-10	5.52931e-07	3.07184e-08	6.41451e-10	7.88054	GO	GO:0030529	intracellular ribonucleoprotein complex
6_73	6	73	1.67527e-11	1.47257e-08	1.47257e-09	1.6926e-11	14.6955	GO	GO:0006413	translational initiation
6_73	6	73	5.60162e-12	4.92382e-09	9.84764e-10	5.62722e-12	19.0469	GO	GO:0000184	nuclear-transcribed mRNA catabolic process, nonsense-mediated decay
6_73	6	73	2.93072e-12	2.5761e-09	6.44026e-10	2.94076e-12	31.5289	GO	GO:0022625	cytosolic large ribosomal subunit
6_73	6	73	1.28595e-12	1.13035e-09	5.65174e-10	1.28741e-12	21.7253	GO	GO:0019083	viral transcription
6_73	6	73	4.69667e-13	4.12837e-10	4.12837e-10	4.69667e-13	23.7679	GO	GO:0006614	SRP-dependent cotranslational protein targeting to membrane
7_55	7	55	0.000925925	0.599073	0.0239629	0.000961594	48.1135	GO	GO:0043518	negative regulation of DNA damage response, signal transduction by p53 class mediator
7_55	7	55	0.000451121	0.291875	0.0138988	0.00046551	11.6761	GO	GO:0002576	platelet degranulation
7_55	7	55	0.000349183	0.225922	0.0118906	0.000359176	12.5138	GO	GO:0005581	collagen trimer
7_55	7	55	0.000344407	0.222831	0.0123795	0.000353701	82.076	GO	GO:0070208	protein heterotrimerization
7_55	7	55	0.000157997	0.102224	0.00638902	0.000161747	126.845	GO	GO:0046598	positive regulation of viral entry into host cell
7_55	7	55	0.000135556	0.087705	0.005847	0.000138554	16.1305	GO	GO:0022617	extracellular matrix disassembly
7_55	7	55	0.000129775	0.0839646	0.00599747	0.000132436	16.3192	GO	GO:0043209	myelin sheath
7_55	7	55	4.96133e-05	0.0320998	0.00246921	5.05508e-05	2.82276	GO	GO:0005576	extracellular region
7_55	7	55	3.06409e-05	0.0198247	0.00180224	3.11219e-05	3.60106	GO	GO:0005615	extracellular space
7_55	7	55	2.77749e-05	0.0179704	0.00199671	2.81226e-05	56.5659	GO	GO:1901214	regulation of neuron death
7_55	7	55	1.77681e-06	0.0011496	0.000229919	1.78786e-06	8.531	GO	GO:0005578	proteinaceous extracellular matrix
7_55	7	55	4.32119e-07	0.000279581	6.98953e-05	4.34132e-07	16.0642	GO	GO:0072562	blood microparticle
7_55	7	55	3.04354e-07	0.000196917	6.5639e-05	3.05298e-07	13.0401	GO	GO:0030198	extracellular matrix organization
7_55	7	55	1.15576e-09	7.47776e-07	3.73888e-07	1.15755e-09	3.53863	GO	GO:0070062	extracellular exosome
7_55	7	55	2.71831e-11	1.75874e-08	1.75874e-08	2.71831e-11	14.0176	GO	GO:0031012	extracellular matrix
8_23	8	23	0.000972609	0.650676	0.0216892	0.00101668	46.3852	GO	GO:0001968	fibronectin binding
8_23	8	23	0.000877914	0.587325	0.0202526	0.000916263	48.9621	GO	GO:0033574	response to testosterone
8_23	8	23	0.000409543	0.273984	0.011416	0.000424124	73.4432	GO	GO:0086013	membrane repolarization during cardiac muscle cell action potential
8_23	8	23	0.000301623	0.201786	0.0126116	0.000308541	24.2565	GO	GO:0010595	positive regulation of endothelial cell migration
8_23	8	23	0.000174501	0.116741	0.00833865	0.000177959	29.3773	GO	GO:0009749	response to glucose
8_23	8	23	0.000133414	0.0892542	0.00743785	0.000135645	135.587	GO	GO:2000279	negative regulation of DNA biosynthetic process
8_23	8	23	0.00011793	0.0788953	0.0071723	0.00011972	8.17297	GO	GO:0031012	extracellular matrix
8_23	8	23	5.73934e-05	0.0383962	0.00639937	5.78256e-05	220.33	GO	GO:0002544	chronic inflammatory response
9_146	9	146	0.000964405	1	0.0214731	0.00100901	5.51622	GO	GO:0042470	melanosome
9_146	9	146	0.000877478	1	0.0201679	0.00091672	7.07001	GO	GO:0043209	myelin sheath
9_146	9	146	0.000851734	1	0.0198971	0.000889173	3.77803	GO	GO:0030424	axon
9_146	9	146	0.000814892	1	0.0193537	0.000850088	17.6923	GO	GO:0050772	positive regulation of axonogenesis
9_146	9	146	0.00073794	1	0.0178231	0.00076925	4.28903	GO	GO:0043025	neuronal cell body
9_146	9	146	0.000571003	0.813679	0.0150681	0.000593061	20.1495	GO	GO:0030878	thyroid gland development
9_146	9	146	0.000467085	0.665596	0.0130509	0.00048407	80.5981	GO	GO:0002934	desmosome organization
9_146	9	146	0.000379662	0.541018	0.0110412	0.000392897	23.3994	GO	GO:0006590	thyroid hormone generation
9_146	9	146	0.000317563	0.452527	0.00942765	0.000328394	2.16333	GO	GO:0005615	extracellular space
9_146	9	146	0.000260777	0.371608	0.00844563	0.000268891	26.866	GO	GO:0046790	virion binding
9_146	9	146	0.000198123	0.282325	0.00688598	0.000203845	9.9096	GO	GO:0015935	small ribosomal subunit
9_146	9	146	0.000135077	0.192485	0.00493551	0.000138778	10.7944	GO	GO:0021762	substantia nigra development
9_146	9	146	0.000132425	0.188705	0.00496593	0.000135955	34.542	GO	GO:0043296	apical junction complex
9_146	9	146	0.000116229	0.165626	0.00460073	0.000119156	36.2691	GO	GO:0070848	response to growth factor
9_146	9	146	5.23945e-05	0.0746621	0.00219595	5.36366e-05	3.28972	GO	GO:0006412	translation
9_146	9	146	2.0882e-05	0.0297569	0.000991895	2.13158e-05	5.55849	GO	GO:0045121	membrane raft
9_146	9	146	5.52105e-06	0.0078675	0.000280982	5.62768e-06	14.6542	GO	GO:0022627	cytosolic small ribosomal subunit
9_146	9	146	4.44025e-06	0.00632735	0.000234346	4.52277e-06	4.58688	GO	GO:0003735	structural constituent of ribosome
9_146	9	146	2.94831e-06	0.00420135	0.00016159	3.00096e-06	6.21434	GO	GO:0030198	extracellular matrix organization
9_146	9	146	1.7123e-06	0.00244003	9.76011e-05	1.74163e-06	2.72803	GO	GO:0044822	poly(A) RNA binding
9_146	9	146	3.75612e-07	0.000535247	2.2302e-05	3.81774e-07	4.93458	GO	GO:0005840	ribosome
9_146	9	146	3.30365e-07	0.000470771	2.04683e-05	3.35546e-07	13.1589	GO	GO:0022625	cytosolic large ribosomal subunit
9_146	9	146	2.4572e-07	0.000350151	1.66739e-05	2.49218e-07	4.10865	GO	GO:0005925	focal adhesion
9_146	9	146	3.94909e-08	5.62746e-05	2.81373e-06	4.00246e-08	6.90841	GO	GO:0006364	rRNA processing
9_146	9	146	7.28157e-09	1.03762e-05	5.46118e-07	7.37472e-09	5.13909	GO	GO:0030529	intracellular ribonucleoprotein complex
9_146	9	146	5.30587e-10	7.56087e-07	6.87351e-08	5.34337e-10	8.84613	GO	GO:0006413	translational initiation
9_146	9	146	1.31528e-11	1.87428e-08	3.74856e-09	1.31899e-11	13.2231	GO	GO:0019083	viral transcription
9_146	9	146	5.75331e-12	8.19846e-09	2.04962e-09	5.76544e-12	12.4209	GO	GO:0000184	nuclear-transcribed mRNA catabolic process, nonsense-mediated decay
9_146	9	146	4.21975e-12	6.01314e-09	2.00438e-09	4.22568e-12	14.4663	GO	GO:0006614	SRP-dependent cotranslational protein targeting to membrane
9_146	9	146	1.81643e-12	2.58841e-09	1.2942e-09	1.8177e-12	7.84804	GO	GO:0031012	extracellular matrix
9_146	9	146	1.11016e-12	1.58198e-09	1.58198e-09	1.11016e-12	2.6387	GO	GO:0070062	extracellular exosome
