# Supplementary material for: Sorting Five Human Tumor Types Reveals Specific Biomarkers and Background Classification Genes
Source: Sci Rep. 2018 May 25;8:8180. doi: 10.1038/s41598-018-26310-x (PMC5970138; doi:10.1038/s41598-018-26310-x)
Supplement: Supplementary file 5 — Supplemental Table 3 [file 41598_2018_26310_MOESM5_ESM.xlsx]

## Sheet: AllClinicalAnnotations
Sorting Five Human Tumor Types Reveals Specific Biomarkers and Background Classification Genes
Kimberly E. Roche, Marvin Weinstein, Leland Dunwoodie, William L. Poehlman, and Frank A. Feltus
Supplemental Table 3. TCGA Clinical Annotations of Tumors.
cancersubtype	primary_diagnosis	gender	tumor_stage	ethnicity	race	file_id	case_id	site_of_resection_or_biopsy	year_of_birth	cigarettes_per_day	weight	alcohol_history	alcohol_intensity	bmi	years_smoked	height	classification_of_tumor	last_known_disease_status	age_at_diagnosis	vital_status	morphology	days_to_death	days_to_last_known_disease_status	days_to_last_follow_up	state3	days_to_recurrence	diagnosis_id	tissue_or_organ_of_origin	tumor_grade	days_to_birth	progression_or_recurrence	prior_malignancy
LGG	c71.0	male	notreported	nothispanicorlatino	white	LGG_unc.edu.5007c6f5-2134-4d0e-8d53-13a0f1439d9e.1817226.rsem.isoforms.results	0906ddde-02fa-417d-927b-1c400b189cac	c71.0	1975	null	null	null	null	null	null	null	Primary Tumor	notreported	13198	alive	null	null	null	1040.0	null	null	3955ca40-a7b2-587a-aa28-2c9a0d06e11e	c71.0	notreported	-13198	notreported	notreported
THCA	c73	female	stagei	nothispanicorlatino	white	THCA_unc.edu.f60d7fbe-225a-48f6-879d-7f342dcf3057.1655408.rsem.isoforms.results	7b49f263-fa0d-4f1b-9c00-1ff7a8c9ac79	c73.9	1979	null	null	null	null	null	null	null	Primary Tumor	notreported	11843	alive	null	null	null	1338.0	null	null	7bfd89fa-68f7-53ed-a2bc-6aa816691d16	c73.9	notreported	-11843	notreported	notreported
LGG	c71.0	male	notreported	nothispanicorlatino	white	LGG_unc.edu.93b27804-df60-4755-928c-88a156ae008c.2331185.rsem.isoforms.results	a1192df3-7667-4d1e-a1a0-79f6cc827dcf	c71.0	1976	null	null	null	null	null	null	null	Primary Tumor	notreported	11509	alive	null	null	null	2602.0	null	null	cfafcb87-c997-5aba-bee2-f34b53a74867	c71.0	notreported	-11509	notreported	notreported
OV	c56.9	female	notreported	notreported	white	OV_unc.edu.30b9b778-1422-4842-ae99-658b8b1d7605.1566213.rsem.isoforms.results	9c744ff8-1cde-4176-b6d7-0ab62bf42620	c56.9	1958	null	null	null	null	null	null	null	Primary Tumor	notreported	18306	alive	null	null	null	529.0	null	null	f6f658e1-75aa-52b0-ae5b-eec6c0b88964	c56.9	notreported	-18306	notreported	notreported
LGG	c71.0	male	notreported	nothispanicorlatino	white	LGG_unc.edu.d231f3e4-48e2-4e94-a995-dcbfc9f0d471.2055675.rsem.isoforms.results	68f550ca-3a33-45e4-b1c9-14f99e543263	c71.0	1986	null	null	null	null	null	null	null	Recurrent Tumor	notreported	8571	dead	null	775.0	null	547.0	null	null	df157cdd-174a-539c-ae8f-698a3b3a46a2	c71.0	notreported	-8571	notreported	notreported
THCA	c73	female	stagei	nothispanicorlatino	white	THCA_unc.edu.d3eee6dd-5682-40a1-8ca8-6e2816512151.1873905.rsem.isoforms.results	9ff3f335-69d1-4caa-a5c5-ee66f4f92d17	c73.9	1988	null	null	null	null	null	null	null	Primary Tumor	notreported	8761	alive	null	null	null	1330.0	null	null	1912fca7-f71b-53fa-9ecf-b84310431991	c73.9	notreported	-8761	notreported	notreported
LGG	c71.0	female	notreported	nothispanicorlatino	white	LGG_unc.edu.b3450230-a250-4c22-ac3b-639abe51fc7b.2277464.rsem.isoforms.results	a56c2083-33d5-4c98-b85f-3b68a3d80add	c71.0	1986	null	null	null	null	null	null	null	Primary Tumor	notreported	10170	alive	null	null	null	638.0	null	null	187fc353-29b9-501d-8563-0c6f1744b421	c71.0	notreported	-10170	notreported	notreported
LGG	c71.0	female	notreported	nothispanicorlatino	white	LGG_unc.edu.7acf607e-4078-49ff-b3f3-8dcd8eee5db5.1858287.rsem.isoforms.results	4e1606e5-f4c1-41a2-9f2c-ad0d02650070	c71.0	1982	null	null	null	null	null	null	null	Primary Tumor	notreported	8912	alive	null	null	null	7.0	null	null	a5883fbd-f69b-5cb0-bf70-c1eae318917b	c71.0	notreported	-8912	notreported	notreported
OV	c56.9	female	notreported	notreported	white	OV_unc.edu.0ed6e7a9-cdaa-48dc-962f-219f1eb39c1a.1552037.rsem.isoforms.results	c183d3fb-2eee-44f8-890e-b9bf907141e6	c56.9	1947	null	null	null	null	null	null	null	Primary Tumor	notreported	21072	alive	null	null	null	1573.0	null	null	8fd8c018-04a7-549f-a3a6-ac8e9b87c065	c56.9	notreported	-21072	notreported	notreported
BLCA	c67.9	male	stageii	nothispanicorlatino	white	BLCA_unc.edu.791a46e8-4d45-4878-b09d-a4f64ce88746.1474963.rsem.isoforms.results	f7c891eb-3b09-4e01-bb8a-53d570518cbe	c67.9	1955	null	82.0	null	null	0.0027717685235262306	null	172.0	Primary Tumor	notreported	20917	alive	null	null	null	163.0	null	null	82b8f2a8-2738-50ef-8bea-329fbc672e24	c67.9	notreported	-20917	notreported	notreported
BLCA	c67.9	female	stageii	nothispanicorlatino	white	BLCA_unc.edu.6c390573-7472-441d-956b-9f4747a18f2b.1212853.rsem.isoforms.results	036b9681-ab58-4734-a8fd-e0d5d078bf5a	c67.9	1937	null	71.5	null	null	0.003220575649745507	null	149.0	Primary Tumor	notreported	26726	alive	null	null	null	546.0	null	null	ce3551e2-c366-5b60-b150-1e95184954ee	c67.9	notreported	-26726	notreported	notreported
GBM	c71.9	male	notreported	nothispanicorlatino	white	GBM_unc.edu.a748d693-fae0-4fb6-ab1e-a347b4e9b7d2.1539348.rsem.isoforms.results	eddbca7a-d668-4c5d-9843-340d7f18e30e	c71.9	1961	null	null	null	null	null	null	null	Primary Tumor	notreported	17037	dead	null	405.0	null	359.0	null	null	23a8a505-ebe7-5bf5-9a67-7e196eebd994	c71.9	notreported	-17037	notreported	notreported
BLCA	c67.0	female	stageiv	nothispanicorlatino	white	BLCA_unc.edu.d785b32a-686a-43d6-9e0b-0b63cfd63772.1212321.rsem.isoforms.results	f8780a4b-7f55-41d1-bf92-8513955d150e	c67.0	1927	null	null	null	null	null	null	null	Primary Tumor	notreported	28987	dead	null	154.0	null	null	null	null	fe910470-54ec-5a10-acba-f1aa4b14186c	c67.0	notreported	-28987	notreported	notreported
BLCA	c67.4	male	stageiv	nothispanicorlatino	white	BLCA_unc.edu.689c1593-3903-4c82-9cb1-1471d8bca178.2469551.rsem.isoforms.results	dd3a6357-9087-44b2-9956-f981e0de6f1c	c67.4	1945	3.780821917808219	65.0	null	null	0.002171806608974573	null	173.0	Primary Tumor	notreported	23323	dead	null	734.0	null	678.0	null	null	37252159-6507-5e1c-ad0f-1fff74fc3c5d	c67.4	notreported	-23323	notreported	notreported
LGG	c71.0	female	notreported	nothispanicorlatino	white	LGG_unc.edu.80f78f2f-4e63-4561-905e-a81528b79cab.2055596.rsem.isoforms.results	d43581a5-3d49-4263-862b-ca99d15ec03d	c71.0	1977	null	null	null	null	null	null	null	Primary Tumor	notreported	13222	alive	null	null	null	55.0	null	null	16003dfb-e343-5252-b0cf-9fda063a2289	c71.0	notreported	-13222	notreported	notreported
THCA	c73	male	stagei	nothispanicorlatino	white	THCA_unc.edu.2d914586-8139-4f9c-be79-99722e36b46a.1902415.rsem.isoforms.results	86657a3c-10cf-48b7-9fda-f2df5e2afad5	c73.9	1984	null	null	null	null	null	null	null	Primary Tumor	notreported	10384	alive	null	null	null	573.0	null	null	69ed34f2-fc15-5bf1-a150-6a2825bb6bbb	c73.9	notreported	-10384	notreported	notreported
THCA	c73	female	stageiva	nothispanicorlatino	white	THCA_unc.edu.92c2186f-ee7b-4297-a876-bc96edc945b4.1325016.rsem.isoforms.results	40a9c1d3-6629-4e22-a783-12e0d48349d1	c73.9	1950	null	null	null	null	null	null	null	Primary Tumor	notreported	20926	alive	null	null	null	2542.0	null	null	d68b676c-4a62-5a67-952f-54a74eb7ba55	c73.9	notreported	-20926	notreported	notreported
GBM	c71.9	male	notreported	nothispanicorlatino	white	GBM_unc.edu.2b467bcc-e33f-4209-92c0-dcff843027ea.1544557.rsem.isoforms.results	50603cc6-42e6-412f-ab07-4805f728e6b6	c71.9	1928	null	null	null	null	null	null	null	Primary Tumor	notreported	29281	dead	null	269.0	null	null	null	null	43bcee6f-ac03-5dbc-9929-3c8612c4c87c	c71.9	notreported	-29281	notreported	notreported
LGG	c71.0	female	notreported	nothispanicorlatino	white	LGG_unc.edu.f389cc26-dd87-44ca-8ceb-fc926d073f4a.1859262.rsem.isoforms.results	9351b1ae-89e6-4091-934f-d50da06cd01d	c71.0	1980	null	null	null	null	null	null	null	Primary Tumor	notreported	11295	alive	null	null	null	286.0	null	null	7cd353f6-1938-5fcb-8cc1-34f5ef946b19	c71.0	notreported	-11295	notreported	notreported
OV	c56.9	female	notreported	nothispanicorlatino	white	OV_unc.edu.ab0701bc-0bc5-4008-a75b-5f665ef9c14a.1523589.rsem.isoforms.results	58f5a54e-de50-4cca-afa1-cc331d8b3479	c56.9	1938	null	null	null	null	null	null	null	Primary Tumor	notreported	23895	dead	null	186.0	null	186.0	null	null	43530a4f-d2b9-5c4b-b4a5-1450b2fa35a4	c56.9	notreported	-23895	notreported	notreported
OV	c56.9	female	notreported	nothispanicorlatino	white	OV_unc.edu.92d5764e-c576-47cd-a6bd-68ed0365c213.1526297.rsem.isoforms.results	16ced1b8-64d5-4498-82df-4d37bfe5b310	c56.9	1928	null	null	null	null	null	null	null	Primary Tumor	notreported	27762	dead	null	1024.0	null	1024.0	null	null	4338074a-9988-5342-ae53-3406d24b6758	c56.9	notreported	-27762	notreported	notreported
LGG	c71.0	female	notreported	nothispanicorlatino	white	LGG_unc.edu.05b85bc7-87db-49bb-85cf-e494554ab191.2271967.rsem.isoforms.results	ba62b5eb-e169-4b41-b949-e004d66e98a1	c71.0	1977	null	null	null	null	null	null	null	Primary Tumor	notreported	13338	alive	null	null	null	342.0	null	null	3f347bcb-b3ba-50c6-b103-cfb5a6ce18ae	c71.0	notreported	-13338	notreported	notreported
OV	c56.9	female	notreported	nothispanicorlatino	white	OV_unc.edu.2fadaf5a-402b-483d-bc26-08feb3dc162d.1563058.rsem.isoforms.results	80f85c54-e12f-4afa-8fa5-5f3e083b6f95	c56.9	1942	null	null	null	null	null	null	null	Primary Tumor	notreported	22294	dead	null	1024.0	null	null	null	null	6b68d896-594c-5763-b893-8203984ca9c1	c56.9	notreported	-22294	notreported	notreported
BLCA	c67.9	male	stageii	nothispanicorlatino	asian	BLCA_unc.edu.6ab37abf-8cc9-4274-bf5c-f08ec3f4d136.2090096.rsem.isoforms.results	b52c870c-bfb8-4e68-86c0-64d57e5c9ae3	c67.9	1945	1.643835616438356	52.0	null	null	0.0017993079584775087	null	170.0	Primary Tumor	notreported	24625	alive	null	null	null	365.0	null	null	0d52687a-7686-55fd-b933-65eb7f82ad89	c67.9	notreported	-24625	notreported	notreported
THCA	c73	female	stagei	nothispanicorlatino	white	THCA_unc.edu.8f6bc2db-4455-4e11-a18b-c98bb1f327bd.1363175.rsem.isoforms.results	5cdaa0c8-27b8-4552-9dcd-20d67b1eb70f	c73.9	1976	null	null	null	null	null	null	null	Primary Tumor	notreported	12252	alive	null	null	null	2033.0	null	null	29a491d8-c193-544c-a831-c80a18876703	c73.9	notreported	-12252	notreported	notreported
THCA	c73	male	stagei	notreported	notreported	THCA_unc.edu.f92e4800-911b-4603-aff1-8af07649763d.1282002.rsem.isoforms.results	286de8cd-7222-4f85-a370-79a7903edf45	c73.9	1979	null	null	null	null	null	null	null	Primary Tumor	notreported	11649	alive	null	null	null	401.0	null	null	6e541c5c-5787-59da-b1e1-4f1fa9f91f88	c73.9	notreported	-11649	notreported	notreported
OV	c56.9	female	notreported	nothispanicorlatino	white	OV_unc.edu.197ea6b5-5716-4e5c-9c7f-92ed4521682a.1553884.rsem.isoforms.results	b0839f46-8c82-4619-be3d-c857a1759463	c56.9	1949	null	null	null	null	null	null	null	Primary Tumor	notreported	21352	alive	null	null	null	684.0	null	null	201d89c4-e6e6-5f26-9ffc-249c94991d25	c56.9	notreported	-21352	notreported	notreported
LGG	c71.0	female	notreported	hispanicorlatino	white	LGG_unc.edu.2ad4f620-2c9a-4bc0-a24d-fddfee88ba32.2334892.rsem.isoforms.results	df78e63d-4387-4177-b24f-f0e2c6c7ac32	c71.0	1986	null	null	null	null	null	null	null	Primary Tumor	notreported	9209	alive	null	null	null	1229.0	null	null	c6b4e111-ac0b-5b01-ac00-1f77523541c1	c71.0	notreported	-9209	notreported	notreported
THCA	c73	female	stageiii	notreported	white	THCA_unc.edu.9f492497-0039-460c-b408-192cc194baf6.1881088.rsem.isoforms.results	4d30606f-3ab6-4ef0-9991-8897cdb9960b	c73.9	1966	null	null	null	null	null	null	null	Primary Tumor	notreported	16671	alive	null	null	null	1073.0	null	null	32449598-464d-5d21-8f89-8379bbad0727	c73.9	notreported	-16671	notreported	notreported
BLCA	c67.9	male	stageii	nothispanicorlatino	asian	BLCA_unc.edu.cbc4cdac-a504-47ed-96cf-5c459f7febd0.1821826.rsem.isoforms.results	122fc134-8915-47db-96c9-ab1853c3cd18	c67.9	1970	0.547945205479452	60.0	null	null	0.0021007667798746544	null	169.0	Primary Tumor	notreported	15497	alive	null	null	null	368.0	null	null	d879cb66-9671-5ca5-a4a7-c35b33d8d5df	c67.9	notreported	-15497	notreported	notreported
LGG	c71.9	female	notreported	nothispanicorlatino	white	LGG_unc.edu.387f62fd-dfeb-4f05-88d1-64d8de9a031a.2403720.rsem.isoforms.results	eb42625e-fbbb-4bee-bbe9-315b3ca2138a	c71.9	1961	null	null	null	null	null	null	null	Recurrent Tumor	notreported	12764	alive	null	null	null	5546.0	null	null	13c464b8-bd62-5d47-91ff-4b2c9183c48b	c71.9	notreported	-12764	notreported	notreported
GBM	c71.9	male	notreported	nothispanicorlatino	white	GBM_unc.edu.01b7a29e-0d3a-4a18-8cb6-f8a329f9d6e6.1545279.rsem.isoforms.results	01a92062-967a-4900-8dc7-a5ecd3b3f8e2	c71.9	1937	null	null	null	null	null	null	null	Recurrent Tumor	notreported	24085	dead	null	399.0	null	396.0	null	null	35904ebf-8d1e-5e06-bd71-d0e08c4b6f42	c71.9	notreported	-24085	notreported	notreported
OV	c56.9	female	notreported	nothispanicorlatino	white	OV_unc.edu.28a681dc-3e0f-4a9c-ad0c-f2bb10aab0e1.1565964.rsem.isoforms.results	ad2b1a0a-153f-483d-b228-5763eba3f6cc	c56.9	1924	null	null	null	null	null	null	null	Primary Tumor	notreported	29373	dead	null	608.0	null	608.0	null	null	e1731d67-eada-531d-baa0-f203daa3117c	c56.9	notreported	-29373	notreported	notreported
GBM	c71.9	male	notreported	nothispanicorlatino	white	GBM_unc.edu.f2ab5972-46e6-4d13-bf8e-dffc1dc8a9e9.1533316.rsem.isoforms.results	6e72d2e2-96fe-4fbb-9fe6-39ec28753eb6	c71.9	1950	null	null	null	null	null	null	null	Primary Tumor	notreported	21131	dead	null	154.0	null	146.0	null	null	cbb2dd7a-0e67-54ea-97a5-b51a6e4a5e99	c71.9	notreported	-21131	notreported	notreported
THCA	c73	female	stagei	nothispanicorlatino	white	THCA_unc.edu.301b8477-c941-47d1-bfa9-01a11334ddcc.1365332.rsem.isoforms.results	2cb43652-109b-4b59-9fcd-512903591f45	c73.9	1981	null	null	null	null	null	null	null	Primary Tumor	notreported	11032	alive	null	null	null	1419.0	null	null	ac8d9bfc-0959-53da-aac1-cdece597ede2	c73.9	notreported	-11032	notreported	notreported
THCA	c73	female	stageiii	nothispanicorlatino	asian	THCA_unc.edu.84ba6854-4027-4301-ad03-95444ccc0ff7.1249885.rsem.isoforms.results	7a9b57c9-6f80-4aea-bf9c-76407c8084be	c73.9	1959	null	null	null	null	null	null	null	Primary Tumor	notreported	19193	alive	null	null	null	1068.0	null	null	d3069947-b5c3-552d-a283-cadb074b5b4f	c73.9	notreported	-19193	notreported	notreported
OV	c56.9	female	notreported	nothispanicorlatino	white	OV_unc.edu.24cfcfd9-ce30-4e24-9470-60265efd6721.1563588.rsem.isoforms.results	e1158102-06f2-47bb-9fe0-49b57f070755	c56.9	1945	null	null	null	null	null	null	null	Primary Tumor	notreported	22100	alive	null	null	null	1342.0	null	null	cfbadd21-1fd9-5470-bec1-e14b76ad9ae8	c56.9	notreported	-22100	notreported	notreported
OV	c56.9	female	notreported	nothispanicorlatino	white	OV_unc.edu.5cf09ce6-44b1-4f0e-89ac-3ea302d684d8.1565003.rsem.isoforms.results	955c80be-53df-4565-9303-a7abf96a2f81	c56.9	1926	null	null	null	null	null	null	null	Primary Tumor	notreported	28093	dead	null	457.0	null	90.0	null	null	728d06d8-6ccd-5a53-90a6-cb4107824d5a	c56.9	notreported	-28093	notreported	notreported
OV	c56.9	female	notreported	nothispanicorlatino	white	OV_unc.edu.d3220bce-1bf3-47c4-951f-937dac7581be.1519868.rsem.isoforms.results	184aac07-44c1-47f1-8adf-50acbcc1762c	c56.9	1936	null	null	null	null	null	null	null	Primary Tumor	notreported	23043	dead	null	138.0	null	null	null	null	e84e8a2c-231c-56f6-97e2-983b9bb2e049	c56.9	notreported	-23043	notreported	notreported
THCA	c73	male	stagei	notreported	notreported	THCA_unc.edu.175e3a6e-b748-4db8-982c-02abb8c23991.1223162.rsem.isoforms.results	4e80f403-0e10-4725-854d-f023c12ee1e2	c73.9	1979	null	null	null	null	null	null	null	Primary Tumor	notreported	11470	alive	null	null	null	636.0	null	null	78dd03ab-7cf0-5467-b781-a1436d110b27	c73.9	notreported	-11470	notreported	notreported
GBM	c71.9	female	notreported	nothispanicorlatino	white	GBM_unc.edu.c893538c-d12c-4dd1-a3fd-cba6a847c14e.1537664.rsem.isoforms.results	ba383ea6-c885-49f0-bddc-e00be0230a6b	c71.9	1937	null	null	null	null	null	null	null	Primary Tumor	notreported	26643	alive	null	null	null	932.0	null	null	2d0e6a86-67a9-57a1-81d8-65433bc0bbe1	c71.9	notreported	-26643	notreported	notreported
GBM	c71.9	female	notreported	nothispanicorlatino	white	GBM_unc.edu.c6d836ec-710d-4559-ba66-2715f6a55d4c.1538740.rsem.isoforms.results	22e0c3ea-9f6d-4d73-9282-17ee4553f436	c71.9	1962	null	null	null	null	null	null	null	Primary Tumor	notreported	17237	alive	null	null	null	604.0	null	null	8be79ed6-67c2-503a-8979-2bc0ed57defe	c71.9	notreported	-17237	notreported	notreported
BLCA	c67.9	female	stageii	nothispanicorlatino	asian	BLCA_unc.edu.4be53c32-b222-44dd-b0b9-6a935591380a.2090014.rsem.isoforms.results	514dcd02-0b33-40ef-8ef1-05272045fc39	c67.9	1934	null	41.0	null	null	0.0016015625	null	160.0	Primary Tumor	notreported	28714	alive	null	null	null	17.0	null	null	bcd4b8d7-9d24-5e32-af99-09e667ff7536	c67.9	notreported	-28714	notreported	notreported
THCA	c73	female	stageiii	nothispanicorlatino	white	THCA_unc.edu.cc1e4628-b327-4013-a3eb-af114c3faa67.1363851.rsem.isoforms.results	745642a0-ddba-495b-bafc-da085552758a	c73.9	1930	null	null	null	null	null	null	null	Primary Tumor	notreported	25881	alive	null	null	null	4780.0	null	null	9bc4b839-6592-5299-8523-2ccd8dcfac7e	c73.9	notreported	-25881	notreported	notreported
LGG	c71.0	female	notreported	notreported	white	LGG_unc.edu.23a4b76d-a3d3-4206-acd5-2eab6bd4face.2408548.rsem.isoforms.results	a66a3847-7570-4486-8845-86b6125104a2	c71.0	1961	null	null	null	null	null	null	null	Primary Tumor	notreported	18494	alive	null	null	null	1397.0	null	null	12bcca94-ee52-5d03-900c-d775855a3775	c71.0	notreported	-18494	notreported	notreported
OV	c56.9	female	notreported	nothispanicorlatino	white	OV_unc.edu.732d0664-c343-4a63-9dc3-40985e540a59.1543194.rsem.isoforms.results	7d1e9451-7a6a-4086-af7f-3ed57505daf0	c56.9	1940	null	null	null	null	null	null	null	Primary Tumor	notreported	22394	dead	null	75.0	null	75.0	null	null	2db40c1c-301c-58b3-8fd4-4144f4d41779	c56.9	notreported	-22394	notreported	notreported
THCA	c73	female	stagei	nothispanicorlatino	white	THCA_unc.edu.d291f0d0-18a9-45c7-b545-9c260fcbf864.1566340.rsem.isoforms.results	faa51172-60ec-48d8-9224-36bfda1d27e0	c73.9	1966	null	null	null	null	null	null	null	Primary Tumor	notreported	13407	alive	null	null	null	4228.0	null	null	2d5f1398-73d0-54d0-b1b0-19a9e81f9846	c73.9	notreported	-13407	notreported	notreported
OV	c56.9	female	notreported	notreported	white	OV_unc.edu.7b39cb0a-7152-4037-9989-57545a1df980.1539610.rsem.isoforms.results	7e4e7914-ec23-4c55-98d6-3c5eecffa8e4	c56.9	1938	null	null	null	null	null	null	null	Primary Tumor	notreported	20453	dead	null	1620.0	null	1620.0	null	null	13e8bf35-e57d-57bc-a649-ba968b92dd9d	c56.9	notreported	-20453	notreported	notreported
OV	c56.9	female	notreported	nothispanicorlatino	white	OV_unc.edu.c8a1ec95-a4b3-4fb2-b135-1c7616db9ab2.1519764.rsem.isoforms.results	6fee41dc-b8a9-4347-8085-b7e05f813ad0	c56.9	1958	null	null	null	null	null	null	null	Primary Tumor	notreported	17207	alive	null	null	null	1386.0	null	null	b0da2290-ee62-5e0f-a177-72bc672062ec	c56.9	notreported	-17207	notreported	notreported
THCA	c73	female	stagei	nothispanicorlatino	notreported	THCA_unc.edu.09cc958e-370f-4120-96df-896c7e602474.1902142.rsem.isoforms.results	da575651-8a69-4d08-aa0f-4a1891b0b44f	c73.9	1973	null	null	null	null	null	null	null	Primary Tumor	notreported	14126	alive	null	null	null	95.0	null	null	f90dd879-7d62-58ce-9224-9ea1295f1115	c73.9	notreported	-14126	notreported	notreported
THCA	c73	male	stageiii	nothispanicorlatino	white	THCA_unc.edu.1f51afcd-b6b1-490b-a8ff-f538094605f5.1564292.rsem.isoforms.results	f82f9ae8-e106-4c61-941c-3614d51b0f41	c73.9	1932	null	null	null	null	null	null	null	Primary Tumor	notreported	24208	dead	null	1597.0	null	null	null	null	a87f38d9-8a5c-5648-9100-253db332a5d9	c73.9	notreported	-24208	notreported	notreported
BLCA	c67.9	male	stageiv	nothispanicorlatino	white	BLCA_unc.edu.f680256f-f3be-4742-8211-6635de93f0b6.2504410.rsem.isoforms.results	cd20b968-b348-44eb-9cdb-f557af8fb468	c67.9	1938	1.095890410958904	68.0	null	null	0.0020987654320987655	null	180.0	Primary Tumor	notreported	27684	dead	null	324.0	null	null	null	null	f33e0c25-495e-505d-bd05-b66b1cd28a93	c67.9	notreported	-27684	notreported	notreported
BLCA	c67.9	male	stageiv	nothispanicorlatino	white	BLCA_unc.edu.d328ae95-7792-4953-a88a-f288a96c4a65.2502701.rsem.isoforms.results	ebad8bc9-f196-4f53-bfea-de38488eb4e1	c67.9	1952	0.1643835616438356	null	null	null	null	null	null	Primary Tumor	notreported	21491	dead	null	864.0	null	null	null	null	58f49fae-ca77-5646-b4cf-7b213dfd3290	c67.9	notreported	-21491	notreported	notreported
OV	c56.9	female	notreported	notreported	white	OV_unc.edu.a16723c4-d5b1-40a0-9890-570351738879.1545547.rsem.isoforms.results	6a57948c-0dc5-4ea2-8043-380f26763752	c56.9	1946	null	null	null	null	null	null	null	Primary Tumor	notreported	21417	dead	null	663.0	null	663.0	null	null	76d84c00-0eb7-5a28-bb2c-e6fb683fecb8	c56.9	notreported	-21417	notreported	notreported
LGG	c71.0	male	notreported	nothispanicorlatino	white	LGG_unc.edu.2f398759-636a-4d58-9fbc-deb15e5beff6.2357994.rsem.isoforms.results	a6975eb0-cfa6-4b7a-bbe4-72bbdd3d3b6f	c71.0	1979	null	null	null	null	null	null	null	Primary Tumor	notreported	10108	alive	null	null	null	3000.0	null	null	da682ce1-566c-5678-9b8e-77344c9f9a2f	c71.0	notreported	-10108	notreported	notreported
GBM	c71.9	male	notreported	nothispanicorlatino	white	GBM_unc.edu.95d8884d-0961-4070-be07-55dce4c7bc8f.1539471.rsem.isoforms.results	3caf009f-d9e0-4c57-b1d9-8eb59fc833bd	c71.9	1927	null	null	null	null	null	null	null	Primary Tumor	notreported	28759	dead	null	448.0	null	448.0	null	null	1adc6550-c22f-5fbe-8638-e7f441fdf530	c71.9	notreported	-28759	notreported	notreported
THCA	c73	male	stagei	nothispanicorlatino	asian	THCA_unc.edu.0a664c34-94cf-490a-8f3e-e735a75af74c.1246618.rsem.isoforms.results	99ef2fec-5a3c-4e42-8f78-7eaf9877e26d	c73.9	1967	null	null	null	null	null	null	null	Primary Tumor	notreported	15949	alive	null	null	null	534.0	null	null	d15aaa2b-eead-5588-ba7a-11573b740abc	c73.9	notreported	-15949	notreported	notreported
THCA	c73	female	stagei	nothispanicorlatino	white	THCA_unc.edu.2ae16d20-e82e-49de-90fd-cad0c6b900ad.1363061.rsem.isoforms.results	87858089-1bad-4e5d-80ed-04f846da9ca4	c73.9	1969	null	null	null	null	null	null	null	Primary Tumor	notreported	12904	alive	null	null	null	3751.0	null	null	b18a94ab-621a-550a-b6b8-1740cc61ab64	c73.9	notreported	-12904	notreported	notreported
BLCA	c67.9	male	stageii	nothispanicorlatino	white	BLCA_unc.edu.8baefcdb-0b95-4f4a-a7ba-3ee75c227bd1.2508815.rsem.isoforms.results	c692e696-37fe-4fc1-90eb-8e34a91a98fc	c67.9	1937	null	70.0	null	null	0.0025711662075298437	null	165.0	Primary Tumor	notreported	27056	dead	null	88.0	null	null	null	null	068efdbc-fbef-57cf-812c-01ee1bc37391	c67.9	notreported	-27056	notreported	notreported
GBM	c71.9	female	notreported	notreported	white	GBM_unc.edu.4bd8bbae-7370-43c7-89cb-0fe0028553dd.1541600.rsem.isoforms.results	72f88d18-03be-4b51-9f4a-1151521b7292	c71.9	1924	null	null	null	null	null	null	null	Primary Tumor	notreported	27387	dead	null	880.0	null	880.0	null	null	579f10c8-df67-5640-aefe-1cea6927e17e	c71.9	notreported	-27387	notreported	notreported
BLCA	c67.9	male	stageiii	notreported	blackorafricanamerican	BLCA_unc.edu.3ae4a552-7df5-4a6b-a9c6-069cc96e7448.2545972.rsem.isoforms.results	45b4b153-e4aa-4080-b0dc-ee81a966978a	c67.9	1938	null	52.0	null	null	0.0021644120707596253	null	155.0	Primary Tumor	notreported	26430	alive	null	null	null	1454.0	null	null	09058fdd-86c7-5eff-8e48-5144079fc292	c67.9	notreported	-26430	notreported	notreported
BLCA	c67.9	male	stageiv	nothispanicorlatino	white	BLCA_unc.edu.2fdb2cad-53e5-44e4-8b80-ee5801964b20.1112777.rsem.isoforms.results	4a9ef220-922c-49cf-bbed-d173b214ed31	c67.9	1925	null	null	null	null	null	null	null	Primary Tumor	notreported	30817	dead	null	149.0	null	null	null	null	cd1ce0d1-907e-501e-8ad6-3e3c92170c9d	c67.9	notreported	-30817	notreported	notreported
BLCA	c67.3	male	stageii	nothispanicorlatino	white	BLCA_unc.edu.7fe70e80-a35e-4a3d-bfb5-e044aec3e6a2.2386742.rsem.isoforms.results	20ebeff1-e5a7-423a-be93-e7ebb82438ac	c67.3	1946	1.0410958904109588	73.0	null	null	0.002203840115928028	null	182.0	Primary Tumor	notreported	24343	alive	null	null	null	610.0	null	null	a62df349-1b22-5c11-a6a3-e95f5d601e7b	c67.3	notreported	-24343	notreported	notreported
BLCA	c67.4	male	stageiii	nothispanicorlatino	white	BLCA_unc.edu.043d2756-1abf-411f-aaac-b448ed088be1.1929144.rsem.isoforms.results	3cccffea-bd7d-4548-bb38-fe5eda630de6	c67.4	1935	6.136986301369863	107.0	null	null	0.003575127802465836	null	173.0	Primary Tumor	notreported	27833	alive	null	null	null	230.0	null	null	92157042-1f08-5a90-b01c-b7a9345ed7f9	c67.4	notreported	-27833	notreported	notreported
LGG	c71.0	male	notreported	nothispanicorlatino	white	LGG_unc.edu.f786ecc3-b6e1-4fb2-9658-25d2831982d9.2350865.rsem.isoforms.results	bc6fbb3c-870d-40b5-983b-7c88705e020d	c71.0	1953	null	null	null	null	null	null	null	Primary Tumor	notreported	20180	dead	null	592.0	null	null	null	null	ca4a820e-24d7-5598-b2fb-33f8e28b9824	c71.0	notreported	-20180	notreported	notreported
OV	c56.9	female	notreported	notreported	white	OV_unc.edu.67fcea16-d5bc-4edd-b66d-bfc5d56d976d.1548193.rsem.isoforms.results	f9793a4b-c0e7-4475-bf80-69543b7ee2f6	c56.9	1974	null	null	null	null	null	null	null	Primary Tumor	notreported	12772	alive	null	null	null	194.0	null	null	3bef7a6b-f7be-543c-a896-f3126e11480c	c56.9	notreported	-12772	notreported	notreported
THCA	c73	female	stageii	nothispanicorlatino	notreported	THCA_unc.edu.ec025dfd-0c20-478f-babb-51c16aab8cf2.1214685.rsem.isoforms.results	1f094db9-f8cc-4066-adff-609682936172	c73.9	1940	null	null	null	null	null	null	null	Primary Tumor	notreported	25690	alive	null	null	null	1215.0	null	null	934b5bab-65be-51b6-9ef8-12397be47608	c73.9	notreported	-25690	notreported	notreported
THCA	c73	female	stageiva	nothispanicorlatino	white	THCA_unc.edu.fa7ae96d-aa85-4328-8806-abed43d7d561.1210771.rsem.isoforms.results	4481d84d-109e-44a0-bcb4-e6e61bdce796	c73.9	1958	null	null	null	null	null	null	null	Primary Tumor	notreported	19159	alive	null	null	null	1721.0	null	null	bea80d2c-5b36-52c6-91c4-9cb06734db53	c73.9	notreported	-19159	notreported	notreported
BLCA	c67.9	male	stageii	nothispanicorlatino	asian	BLCA_unc.edu.0f1dc780-622d-4f97-80e2-25d8074ff8b1.2440048.rsem.isoforms.results	6a3e87d7-e360-44c5-9764-4b630df383e6	c67.9	1954	null	66.0	null	null	0.002179944510503369	null	174.0	Primary Tumor	notreported	21636	alive	null	null	null	345.0	null	null	2bb7e236-84ec-56fd-91fd-512635162960	c67.9	notreported	-21636	notreported	notreported
THCA	c73	female	stagei	notreported	white	THCA_unc.edu.d73edb10-76fc-4bb0-83c4-ac35f73da627.1216881.rsem.isoforms.results	0b170ed4-d919-466b-b765-47878b865aed	c73.9	1972	null	null	null	null	null	null	null	Primary Tumor	notreported	13668	alive	null	null	null	1709.0	null	null	b7d69ae1-a59f-59c9-87f2-075b96c8f3f4	c73.9	notreported	-13668	notreported	notreported
OV	c56.9	female	notreported	notreported	notreported	OV_unc.edu.5a505632-422c-4083-b867-82a7a503b314.1565534.rsem.isoforms.results	02d9aa2e-b16a-48ea-a420-5daed9fd51a6	c56.9	1950	null	null	null	null	null	null	null	Primary Tumor	notreported	21423	alive	null	null	null	147.0	null	null	6adf251d-ef48-5413-8547-40f40921f744	c56.9	notreported	-21423	notreported	notreported
THCA	c73	male	stagei	nothispanicorlatino	white	THCA_unc.edu.c578fb16-0105-4e86-b582-440dfee16791.1666190.rsem.isoforms.results	e071c940-60fa-4c73-bb65-1ad670021854	c73.9	1961	null	null	null	null	null	null	null	Primary Tumor	notreported	18417	alive	null	null	null	577.0	null	null	67e911c6-b3ee-59c1-a9e7-6b733252fd47	c73.9	notreported	-18417	notreported	notreported
GBM	c71.9	male	notreported	nothispanicorlatino	white	GBM_unc.edu.497767ca-3148-46d2-b4fc-15530c678b0b.1543264.rsem.isoforms.results	e3251837-f6f3-4dad-856f-108e20d03dad	c71.9	1928	null	null	null	null	null	null	null	Primary Tumor	notreported	29753	dead	null	382.0	null	86.0	null	null	d249bf37-fbd8-57f8-8c5a-1051a8ceb7b3	c71.9	notreported	-29753	notreported	notreported
LGG	c71.0	female	notreported	nothispanicorlatino	white	LGG_unc.edu.b817310e-3a4b-4622-8564-350ccb0a9e69.2332488.rsem.isoforms.results	77472095-030d-4679-921d-8e8e217956c5	c71.0	1968	null	null	null	null	null	null	null	Primary Tumor	notreported	16560	alive	null	null	null	438.0	null	null	31e89ceb-3d72-58ca-9696-329db8a842f3	c71.0	notreported	-16560	notreported	notreported
THCA	c73	female	stagei	nothispanicorlatino	white	THCA_unc.edu.97fdc46a-5542-4d28-abdb-cc595f0d4c8c.1356705.rsem.isoforms.results	729fc937-192a-4eb7-b357-b8f0d2da1f08	c73.9	1981	null	null	null	null	null	null	null	Solid Tissue Normal	notreported	11024	alive	null	null	null	504.0	null	null	4ff8672b-7389-597c-982f-9283eba6a28e	c73.9	notreported	-11024	notreported	notreported
LGG	c71.0	male	notreported	nothispanicorlatino	white	LGG_unc.edu.69f6df2f-7cd7-4477-b464-1fd06bd1e9c8.1421826.rsem.isoforms.results	648252da-dd86-48d1-ae75-4257e3142b0b	c71.0	1948	null	null	null	null	null	null	null	Primary Tumor	notreported	22735	alive	null	null	null	1588.0	null	null	be1a1afa-75a1-5a22-aa5a-b1b34e36ea8a	c71.0	notreported	-22735	notreported	notreported
OV	c56.9	female	notreported	notreported	white	OV_unc.edu.c72e442b-36f5-4ea6-a893-505b5ccd8c4f.1520645.rsem.isoforms.results	23d32627-9fd2-4312-bcda-ee7409e3983f	c56.9	1954	null	null	null	null	null	null	null	Primary Tumor	notreported	20210	alive	null	null	null	163.0	null	null	3e3aadeb-f781-5f50-86b3-d49f1aa93c4f	c56.9	notreported	-20210	notreported	notreported
LGG	c71.0	male	notreported	hispanicorlatino	white	LGG_unc.edu.53caa54a-c88e-423e-a33c-9e8d69daf2cd.2032023.rsem.isoforms.results	04d56bed-98fb-45eb-8c90-95e69264dfe2	c71.0	1987	null	null	null	null	null	null	null	Primary Tumor	notreported	8820	alive	null	null	null	3.0	null	null	7dbf7fea-521d-5eb8-a738-1d0d4c7c1bb2	c71.0	notreported	-8820	notreported	notreported
BLCA	c67.9	male	stageiii	nothispanicorlatino	asian	BLCA_unc.edu.d6d7412b-5ec2-413e-a85d-7f765c67afa3.1213698.rsem.isoforms.results	7fee9d6f-c0ea-43c2-89c2-66d965a077a8	c67.9	1959	null	59.0	null	null	0.002041522491349481	null	170.0	Primary Tumor	notreported	19270	alive	null	null	null	425.0	null	null	1cf4b4f9-3778-5cd7-ae42-798168acceed	c67.9	notreported	-19270	notreported	notreported
LGG	c71.0	male	notreported	nothispanicorlatino	white	LGG_unc.edu.aed81cc7-515a-45f8-9017-bf6df58f2235.1859541.rsem.isoforms.results	4240c137-ee3a-474c-9426-470380cb41a2	c71.0	1981	null	null	null	null	null	null	null	Primary Tumor	notreported	11043	alive	null	null	null	162.0	null	null	8a3a7988-7c17-5679-9c36-4e4e598d68d2	c71.0	notreported	-11043	notreported	notreported
BLCA	c67.9	male	stageiv	nothispanicorlatino	white	BLCA_unc.edu.f3872d71-1889-4756-bdb4-d5ae383758a8.1385538.rsem.isoforms.results	9cc92795-7a24-4875-87f0-3efccbfcc970	c67.9	1956	0.821917808219178	84.0	null	null	0.0025082863029651527	null	183.0	Primary Tumor	notreported	20420	alive	null	null	null	603.0	null	null	5002ce18-3c71-5703-ad89-0dae9fa7f7b1	c67.9	notreported	-20420	notreported	notreported
BLCA	c67.1	female	stageiii	notreported	notreported	BLCA_unc.edu.99471b35-21e6-44cb-863e-d60521a71b31.1966723.rsem.isoforms.results	691adaa9-196a-4b62-9437-640c4ae6e2b2	c67.1	null	null	69.0	null	null	0.0025970115548195265	null	163.0	Primary Tumor	notreported	19016	alive	null	null	null	1947.0	null	null	53818876-dd70-5e73-9c70-221ed603e4ec	c67.1	notreported	-19016	notreported	notreported
LGG	c71.0	male	notreported	nothispanicorlatino	white	LGG_unc.edu.738ae7fd-6fa8-4aa4-b01f-34a519dc279f.2352230.rsem.isoforms.results	79627774-078d-4056-84b3-f1f370f643e0	c71.0	1971	null	null	null	null	null	null	null	Primary Tumor	notreported	15300	alive	null	null	null	826.0	null	null	9aa30811-9b3c-5123-b79f-a91ee9d950f7	c71.0	notreported	-15300	notreported	notreported
BLCA	c67.9	male	stageiv	nothispanicorlatino	white	BLCA_unc.edu.50dd2bb1-e069-42f8-89f4-1e3055adafee.1782514.rsem.isoforms.results	0691b8c5-6244-407c-8601-fa1bda01ff2a	c67.9	1944	1.095890410958904	102.0	null	null	0.003148148148148148	null	180.0	Primary Tumor	notreported	25134	dead	null	577.0	null	344.0	null	null	29f6ef3b-4a41-504d-a20c-6c0a47a10fdc	c67.9	notreported	-25134	notreported	notreported
THCA	c73	female	stagei	notreported	notreported	THCA_unc.edu.d82a6d70-ca0e-42da-94b6-70554643139a.1654273.rsem.isoforms.results	14591ce2-ed02-440d-8004-7ca0ad94d0a7	c73.9	1983	null	null	null	null	null	null	null	Primary Tumor	notreported	10447	alive	null	null	null	908.0	null	null	02492ee4-c5dd-517b-8a24-e5f66500de43	c73.9	notreported	-10447	notreported	notreported
LGG	c71.0	female	notreported	notreported	white	LGG_unc.edu.cd61bf43-fca1-49b2-824e-133484a6e069.2412238.rsem.isoforms.results	c8700ca3-8c0b-4b2a-9e87-79d244a0f892	c71.0	1978	null	null	null	null	null	null	null	Primary Tumor	notreported	11855	alive	null	null	null	1337.0	null	null	dc5260bf-ca37-5e7f-848f-560a832fa647	c71.0	notreported	-11855	notreported	notreported
GBM	c71.9	male	notreported	nothispanicorlatino	white	GBM_unc.edu.6a85fda0-3e2d-4bd8-ba44-5ce821c39504.1540412.rsem.isoforms.results	bc7a0c8f-c1c1-447c-8019-389e52525081	c71.9	1971	null	null	null	null	null	null	null	Primary Tumor	notreported	13368	dead	null	427.0	null	427.0	null	null	cd719fcf-0217-5fde-ae8d-32d9e2827ef1	c71.9	notreported	-13368	notreported	notreported
LGG	c71.0	male	notreported	nothispanicorlatino	white	LGG_unc.edu.059686a6-baf9-4609-a26f-2d0fa3b7a685.2271628.rsem.isoforms.results	446d76df-3e78-4272-a942-ced0de27c794	c71.0	1991	null	null	null	null	null	null	null	Primary Tumor	notreported	8043	alive	null	null	null	333.0	null	null	281797df-a123-5f26-9f4f-b3249e305e44	c71.0	notreported	-8043	notreported	notreported
BLCA	c67.9	female	stageiii	nothispanicorlatino	white	BLCA_unc.edu.e1adc304-07de-493e-a800-50fc1ab65b30.2649251.rsem.isoforms.results	c1591625-e794-4155-8ae4-b74d6264659f	c67.9	1947	1.643835616438356	56.0	null	null	0.001960715661216344	null	169.0	Primary Tumor	notreported	22411	alive	null	null	null	2293.0	null	null	d10bed22-2e95-51cc-aa1f-c24e60d33157	c67.9	notreported	-22411	notreported	notreported
LGG	c71.0	female	notreported	nothispanicorlatino	blackorafricanamerican	LGG_unc.edu.4c7061f2-ff48-4079-97b6-7ae3c7c0f905.2277418.rsem.isoforms.results	baaddd76-277f-4c90-9cc2-0fece30c9735	c71.0	1976	null	null	null	null	null	null	null	Primary Tumor	notreported	13597	alive	null	null	null	777.0	null	null	464e5f04-957e-52ae-bf0e-d6207afab185	c71.0	notreported	-13597	notreported	notreported
BLCA	c67.9	male	stageiii	nothispanicorlatino	asian	BLCA_unc.edu.1e9aa67a-52fe-4af3-8bbf-3597a57a4b72.2389795.rsem.isoforms.results	c8adce3d-4914-4851-9952-846b0c9c32de	c67.9	1949	0.273972602739726	48.0	null	null	0.0017006802721088435	null	168.0	Primary Tumor	notreported	23497	alive	null	null	null	394.0	null	null	2c897d8f-acc7-5369-8f90-3b65455c3906	c67.9	notreported	-23497	notreported	notreported
THCA	c73	male	stagei	nothispanicorlatino	white	THCA_unc.edu.c3a60103-efb6-4553-bb36-917fcb21d811.1249518.rsem.isoforms.results	300720c8-68e5-4a3b-a873-3ad36ad0f953	c73.9	1971	null	null	null	null	null	null	null	Primary Tumor	notreported	12348	alive	null	null	null	2031.0	null	null	72333db1-1114-5014-bfcf-ab8d783a4319	c73.9	notreported	-12348	notreported	notreported
BLCA	c67.2	female	stageiii	nothispanicorlatino	white	BLCA_unc.edu.024bc00e-0419-4dc6-8df4-ad3af476314d.1475254.rsem.isoforms.results	d63c186d-add6-492e-8250-e83f46d39d00	c67.2	1944	1.643835616438356	70.0	null	null	0.002804037814452812	null	158.0	Primary Tumor	notreported	24553	dead	null	321.0	null	null	null	null	75da8c11-004f-52d1-9efd-4603456a038b	c67.2	notreported	-24553	notreported	notreported
OV	c56.9	female	notreported	notreported	white	OV_unc.edu.7ecd0f7a-d186-422b-a2e1-833dfc400e39.1533449.rsem.isoforms.results	44e840c9-ea54-4dba-9b2a-264ef1f2c304	c56.9	1931	null	null	null	null	null	null	null	Primary Tumor	notreported	28147	alive	null	null	null	454.0	null	null	64f96092-ae3e-556c-9c0c-cbba2bdef290	c56.9	notreported	-28147	notreported	notreported
THCA	c73	female	stagei	nothispanicorlatino	asian	THCA_unc.edu.842a5261-5e7f-4ad7-a426-0ce48e937919.1831120.rsem.isoforms.results	afb00cd4-e5da-4251-86fb-532c3f65324c	c73.9	1977	null	null	null	null	null	null	null	Primary Tumor	notreported	11472	alive	null	null	null	404.0	null	null	4c04ddb5-ee0d-5206-a87c-958558e55720	c73.9	notreported	-11472	notreported	notreported
LGG	c71.9	male	notreported	nothispanicorlatino	white	LGG_unc.edu.62b17846-7d74-4a34-bbed-48c4c9e462f9.1649571.rsem.isoforms.results	0d61bdbd-24b1-4885-a099-9e42ca7eedcd	c71.9	1967	null	null	null	null	null	null	null	Primary Tumor	notreported	14659	alive	null	null	null	434.0	null	null	2804a2bf-60a3-5a33-98f4-56a842269897	c71.9	notreported	-14659	notreported	notreported
LGG	c71.9	male	notreported	nothispanicorlatino	white	LGG_unc.edu.c57ba10b-0485-4566-be4b-def8197360a4.1567793.rsem.isoforms.results	41456932-436e-4cdb-bfe8-97d089656786	c71.9	1943	null	null	null	null	null	null	null	Primary Tumor	notreported	24686	alive	null	null	null	530.0	null	null	531ca2f1-af7d-5f00-8a4a-9c911ddc8b30	c71.9	notreported	-24686	notreported	notreported
LGG	c71.0	female	notreported	nothispanicorlatino	white	LGG_unc.edu.477e059b-1b0a-4f2b-b14d-8e1362fc38ee.1674123.rsem.isoforms.results	d58b535a-6c95-43bb-ad88-0600e6447537	c71.0	1951	null	null	null	null	null	null	null	Primary Tumor	notreported	21331	alive	null	null	null	455.0	null	null	0a67fe2b-c881-54fe-811e-adfb870b183a	c71.0	notreported	-21331	notreported	notreported
BLCA	c67.9	male	stageii	nothispanicorlatino	white	BLCA_unc.edu.bd7c10f2-12d7-4405-a3bc-0809237dcb85.2510502.rsem.isoforms.results	7d71945a-b81a-405c-bb17-cec9b1d7592c	c67.9	1940	0.4383561643835616	87.0	null	null	0.002906879615089044	null	173.0	Primary Tumor	notreported	25642	alive	null	null	null	1455.0	null	null	dd8e3e6c-0adf-5e27-a91c-8df9a90d6622	c67.9	notreported	-25642	notreported	notreported
BLCA	c67.9	female	stageii	hispanicorlatino	white	BLCA_unc.edu.80ddbbc6-11ff-469a-96ec-a72e0e2ec9c4.1475094.rsem.isoforms.results	d53eade8-a845-4252-aece-92f3573486a7	c67.9	1934	4.383561643835616	null	null	null	null	null	null	Primary Tumor	notreported	28444	alive	null	null	null	646.0	null	null	17b6a319-ca82-5b6a-bfc6-ce2fc1b50c34	c67.9	notreported	-28444	notreported	notreported
THCA	c73	female	stageiii	notreported	notreported	THCA_unc.edu.62eaa394-4b8c-4719-b483-c450d223597b.1654363.rsem.isoforms.results	d5932dd7-b777-427f-8b55-3ec369fd76a3	c73.9	1949	null	null	null	null	null	null	null	Primary Tumor	notreported	22990	alive	null	null	null	1182.0	null	null	ec115d29-2d5e-5fdb-8213-4c31e75730fe	c73.9	notreported	-22990	notreported	notreported
GBM	c71.9	male	notreported	nothispanicorlatino	white	GBM_unc.edu.d722657b-e5b6-4476-94e9-1135ce8aecad.1535536.rsem.isoforms.results	309005a2-93a8-4566-b8d3-6b9310144266	c71.9	1957	null	null	null	null	null	null	null	Recurrent Tumor	notreported	18659	dead	null	141.0	null	141.0	null	null	728c9c04-c344-55c5-beee-deaaacf218e4	c71.9	notreported	-18659	notreported	notreported
LGG	c71.0	male	notreported	nothispanicorlatino	white	LGG_unc.edu.a00de36d-7c6d-453a-b791-08c752ccfefc.1674245.rsem.isoforms.results	e78e8845-9fba-48ba-8cf3-418429ea5f56	c71.0	1980	null	null	null	null	null	null	null	Primary Tumor	notreported	10673	alive	null	null	null	3.0	null	null	4396afe2-c565-575f-9226-f9cb9f589818	c71.0	notreported	-10673	notreported	notreported
OV	c56.9	female	notreported	nothispanicorlatino	white	OV_unc.edu.3a080008-8266-4e2d-a143-adac14991b22.2722189.rsem.isoforms.results	fd4740db-76a8-4362-be71-7b609479bb67	c56.9	1933	null	null	null	null	null	null	null	Primary Tumor	notreported	26267	dead	null	1369.0	null	1369.0	null	null	b83acbb5-bdc4-5596-ae26-e11bf4b79790	c56.9	notreported	-26267	notreported	notreported
LGG	c71.0	male	notreported	nothispanicorlatino	white	LGG_unc.edu.55c39d1f-7300-42e9-8205-d919cdddf558.2400786.rsem.isoforms.results	172701cf-709b-4e8f-b2fa-e2690a9e272d	c71.0	1967	null	null	null	null	null	null	null	Primary Tumor	notreported	16470	alive	null	null	null	166.0	null	null	f1256f3e-2f3f-5ea6-805f-6fc9be900397	c71.0	notreported	-16470	notreported	notreported
THCA	c73	female	stageiva	notreported	notreported	THCA_unc.edu.a8d45785-d6e2-4c38-9625-ee36e2a1017a.1902661.rsem.isoforms.results	f854ce67-c586-4424-a674-2dd67ad0ed7f	c73.9	1963	null	null	null	null	null	null	null	Primary Tumor	notreported	18185	alive	null	null	null	802.0	null	null	badfd5e2-17a0-563d-b505-5abc576f98d3	c73.9	notreported	-18185	notreported	notreported
THCA	c73	female	stagei	nothispanicorlatino	white	THCA_unc.edu.79cc211c-8723-4f0b-bc32-89b3efcc8577.1381585.rsem.isoforms.results	c115df9d-cec4-4d7a-87f0-36a5c1f1d51f	c73.9	1966	null	null	null	null	null	null	null	Primary Tumor	notreported	16110	alive	null	null	null	1533.0	null	null	4cb4d1cd-1bbc-5420-add1-2d710ec875e3	c73.9	notreported	-16110	notreported	notreported
BLCA	c67.9	male	stageiv	nothispanicorlatino	white	BLCA_unc.edu.519498f2-999e-4b9c-980c-b83ec3828186.2647333.rsem.isoforms.results	f5e03536-26e1-480d-a7bb-010eb8210cd6	c67.9	1921	null	65.0	null	null	0.0020286507911738087	null	179.0	Primary Tumor	notreported	31049	dead	null	362.0	null	null	null	null	8357327f-a5e5-561b-8825-d271470eb6ee	c67.9	notreported	-31049	notreported	notreported
GBM	c71.9	male	notreported	nothispanicorlatino	white	GBM_unc.edu.271ec214-e83b-4fcb-85cf-f35f3c39f0aa.1544683.rsem.isoforms.results	53abce1d-7e33-4ebd-832f-f3789f67377f	c71.9	1966	null	null	null	null	null	null	null	Primary Tumor	notreported	14235	dead	null	2681.0	null	1642.0	null	null	1a2ee787-e7ce-5aea-8fcf-85bf1cae01c9	c71.9	notreported	-14235	notreported	notreported
THCA	c73	female	stagei	nothispanicorlatino	white	THCA_unc.edu.f1526b61-bc90-46be-bfbe-9279a247ef66.1662016.rsem.isoforms.results	69f621c8-de77-48c7-8939-4c887da9e6d8	c73.9	1960	null	null	null	null	null	null	null	Primary Tumor	notreported	18871	alive	null	null	null	986.0	null	null	b8d0d695-4546-5e03-aa20-e4fda83c8e2b	c73.9	notreported	-18871	notreported	notreported
LGG	c71.0	female	notreported	nothispanicorlatino	white	LGG_unc.edu.234d1db1-82a5-4b7d-b5f3-044a440b4233.2347347.rsem.isoforms.results	23c335f6-5749-4443-8ae8-61cccbb137cb	c71.0	1984	null	null	null	null	null	null	null	Primary Tumor	notreported	9546	dead	null	987.0	null	null	null	null	f0aa420c-f434-5828-b465-20b55e05c15e	c71.0	notreported	-9546	notreported	notreported
LGG	c71.9	male	notreported	nothispanicorlatino	white	LGG_unc.edu.71fddbd0-c910-40f0-80fb-09148065220b.1670023.rsem.isoforms.results	799e9106-e62e-4681-8861-137f474ee8b8	c71.9	1987	null	null	null	null	null	null	null	Primary Tumor	notreported	7946	alive	null	null	null	908.0	null	null	830babba-1d07-5063-8400-74c0c19c5bc4	c71.9	notreported	-7946	notreported	notreported
LGG	c71.0	male	notreported	nothispanicorlatino	white	LGG_unc.edu.1b95fcab-d55c-49b8-b3eb-0b156ca02812.1816550.rsem.isoforms.results	bae316e3-1fa4-4fa7-8ad6-a458857a85d4	c71.0	1957	null	null	null	null	null	null	null	Primary Tumor	notreported	19555	alive	null	null	null	3.0	null	null	a3b96974-2c62-517f-b109-23fb90f33135	c71.0	notreported	-19555	notreported	notreported
LGG	c71.0	male	notreported	hispanicorlatino	white	LGG_unc.edu.2242fa55-5ea8-4143-92aa-f5bab77f6cec.1816059.rsem.isoforms.results	c7b2833a-9fe8-49f6-b888-2d27b0516f5c	c71.0	1947	null	null	null	null	null	null	null	Primary Tumor	notreported	23486	alive	null	null	null	169.0	null	null	ea2e3b23-a2d9-50ae-ad58-924f6db1fd0c	c71.0	notreported	-23486	notreported	notreported
LGG	c71.0	female	notreported	nothispanicorlatino	white	LGG_unc.edu.d1c8d59f-1ab1-4450-8d3f-b7bc6e05cd7f.2046001.rsem.isoforms.results	c031f2a5-a563-4d5b-bd62-49d4fa5eca78	c71.0	1965	null	null	null	null	null	null	null	Primary Tumor	notreported	17339	alive	null	null	null	449.0	null	null	7a82ecb8-ba0e-53be-86fa-10d96e41a67c	c71.0	notreported	-17339	notreported	notreported
THCA	c73	male	stagei	nothispanicorlatino	white	THCA_unc.edu.373d657b-4708-4548-9495-6e12fb099d10.1220097.rsem.isoforms.results	25d8a79e-15fd-4c8a-a7f6-05d78973b757	c73.9	1986	null	null	null	null	null	null	null	Solid Tissue Normal	notreported	9221	alive	null	null	null	659.0	null	null	b15ac013-b9c0-583d-bbeb-5dacac81cf88	c73.9	notreported	-9221	notreported	notreported
LGG	c71.0	male	notreported	nothispanicorlatino	white	LGG_unc.edu.905404ec-68c8-45d8-a9ad-ec08cbe207f4.1654228.rsem.isoforms.results	b9e2f4d1-866c-4c62-a9c8-8de7eb364a6e	c71.0	1981	null	null	null	null	null	null	null	Primary Tumor	notreported	11097	dead	null	351.0	null	238.0	null	null	a8bc07f5-1362-5a41-b37d-a144a65e4a16	c71.0	notreported	-11097	notreported	notreported
BLCA	c67.9	female	stageiii	nothispanicorlatino	white	BLCA_unc.edu.8b3cfbe2-bb77-4fe0-af7c-569f83701beb.2635387.rsem.isoforms.results	4fece3d0-649c-4771-b9c4-a3397cea0feb	c67.9	1935	3.287671232876712	61.0	null	null	0.00224058769513315	null	165.0	Primary Tumor	notreported	27777	dead	null	76.0	null	null	null	null	cbd16a62-2e04-5466-b4c5-7671070a1593	c67.9	notreported	-27777	notreported	notreported
LGG	c71.0	male	notreported	nothispanicorlatino	blackorafricanamerican	LGG_unc.edu.65a188b3-1fc9-4021-bc3e-158c0cce2c8e.1670320.rsem.isoforms.results	45b6d41b-3a1b-47e9-80e4-59355170aee7	c71.0	1946	null	null	null	null	null	null	null	Primary Tumor	notreported	22302	alive	null	null	null	671.0	null	null	93c0bff7-4c8d-5d14-8f44-3412473bb325	c71.0	notreported	-22302	notreported	notreported
BLCA	c67.9	male	stageiv	nothispanicorlatino	white	BLCA_unc.edu.4cdcbbae-5859-414b-bc81-001b25a3d4f1.2649521.rsem.isoforms.results	0ec37c2c-8d90-48c1-9cbc-69fe6473c980	c67.9	1925	1.095890410958904	87.0	null	null	0.0034850184265342093	null	158.0	Primary Tumor	notreported	29547	dead	null	344.0	null	null	null	null	b61d6c1b-0013-5c6f-9709-d4a6cb164abb	c67.9	notreported	-29547	notreported	notreported
BLCA	c67.9	male	stageii	nothispanicorlatino	asian	BLCA_unc.edu.0c1e7ecc-d20d-4047-8419-6347537cb8a3.1821611.rsem.isoforms.results	9bcff619-f75a-4aa4-9e09-2e9aa7b59225	c67.9	1957	null	68.0	null	null	0.002352941176470588	null	170.0	Primary Tumor	notreported	20432	alive	null	null	null	373.0	null	null	2204daae-3aed-5866-b5d1-e74d4ab193a4	c67.9	notreported	-20432	notreported	notreported
GBM	c71.9	male	notreported	nothispanicorlatino	white	GBM_unc.edu.e64a2789-9b0e-41ca-9447-b17d8968f4cd.1535368.rsem.isoforms.results	a28b256e-e085-467d-bdba-5c39718012d7	c71.9	1950	null	null	null	null	null	null	null	Primary Tumor	notreported	21560	alive	null	null	null	452.0	null	null	db7099d6-acbe-5cfa-9c04-f6e25e309285	c71.9	notreported	-21560	notreported	notreported
LGG	c71.0	male	notreported	nothispanicorlatino	white	LGG_unc.edu.315a7141-0f36-4cac-94a7-748849ee8926.2350525.rsem.isoforms.results	8e44fb97-c649-4056-80ac-257cef61d226	c71.0	1939	null	null	null	null	null	null	null	Primary Tumor	notreported	25419	dead	null	316.0	null	null	null	null	b557f45c-876f-5a3e-8858-b6c1a0ce1c62	c71.0	notreported	-25419	notreported	notreported
LGG	c71.0	female	notreported	nothispanicorlatino	white	LGG_unc.edu.dd69f2af-4ec7-4fb5-bc82-cc93686e2790.1578301.rsem.isoforms.results	fc8828ae-484d-4fc8-a168-f8bc58ad65b9	c71.0	1957	null	null	null	null	null	null	null	Primary Tumor	notreported	20136	alive	null	null	null	431.0	null	null	b3851bd6-4370-5b87-966a-786a7b5703b0	c71.0	notreported	-20136	notreported	notreported
LGG	c71.0	male	notreported	nothispanicorlatino	white	LGG_unc.edu.fa83a73a-1157-42a7-9ed6-7eb73f71724c.1651213.rsem.isoforms.results	fb3884df-3680-4c5b-8092-981007aeba03	c71.0	1975	null	null	null	null	null	null	null	Primary Tumor	notreported	13621	alive	null	null	null	433.0	null	null	21382b4d-7002-5c10-bda6-0a0baec492a2	c71.0	notreported	-13621	notreported	notreported
OV	c56.9	female	notreported	notreported	blackorafricanamerican	OV_unc.edu.4da3ccd5-53e1-46f5-874d-e5d131dbfc52.1555303.rsem.isoforms.results	d7b3156d-672a-4a55-868d-9ca6a09fcb0f	c56.9	1943	null	null	null	null	null	null	null	Primary Tumor	notreported	20902	dead	null	676.0	null	676.0	null	null	ed25dede-8f3b-53e0-b342-842614bc07b4	c56.9	notreported	-20902	notreported	notreported
THCA	c73	female	stagei	notreported	notreported	THCA_unc.edu.7c79678c-45ca-4c2c-b2db-11e00c3864f6.1901374.rsem.isoforms.results	0dc361b5-e755-4131-8766-d2c1375336d8	c73.9	1978	null	null	null	null	null	null	null	Primary Tumor	notreported	12383	alive	null	null	null	649.0	null	null	9706ce7d-3b95-5a01-8e95-922e81c2d839	c73.9	notreported	-12383	notreported	notreported
LGG	c71.0	female	notreported	nothispanicorlatino	white	LGG_unc.edu.ac3caaa0-3464-4a39-aa98-fe0e82d6d36c.2090056.rsem.isoforms.results	1c095c4a-df97-402e-902c-fc83bcf8ef88	c71.0	1951	null	null	null	null	null	null	null	Primary Tumor	notreported	22811	alive	null	null	null	796.0	null	null	d78e28e5-6524-5aab-ba6a-6e3cfe0c1a1d	c71.0	notreported	-22811	notreported	notreported
OV	c56.9	female	notreported	notreported	white	OV_unc.edu.bdc4400c-c552-450b-a806-2ae10f61cca8.2722655.rsem.isoforms.results	b867e933-e3e3-4491-9bb6-b18c48d6f173	c56.9	1929	null	null	null	null	null	null	null	Primary Tumor	notreported	25191	dead	null	2049.0	null	2049.0	null	null	566061b0-53fa-5c9b-aba1-fe01ff343b32	c56.9	notreported	-25191	notreported	notreported
GBM	c71.9	male	notreported	notreported	white	GBM_unc.edu.63f989ff-890b-4db8-973f-ab675912635f.1542094.rsem.isoforms.results	46bfebf4-0ef6-4348-81dc-d7d3cb52c08f	c71.9	1958	null	null	null	null	null	null	null	Primary Tumor	notreported	19053	dead	null	544.0	null	474.0	null	null	5c4f05ac-c5be-5c5d-8175-e6ee5d9f1f09	c71.9	notreported	-19053	notreported	notreported
BLCA	c67.9	male	stageiii	nothispanicorlatino	white	BLCA_unc.edu.fe25dbd6-adbf-47a3-9929-f392d5347bde.2502177.rsem.isoforms.results	5f5c1775-a908-483d-8a77-b902c5b7570e	c67.9	1939	null	82.0	null	null	0.002588057063502083	null	178.0	Primary Tumor	notreported	25190	alive	null	null	null	799.0	null	null	383d65d7-6797-5842-ac0c-eea1c7e7a10f	c67.9	notreported	-25190	notreported	notreported
THCA	c73	male	stageiii	nothispanicorlatino	white	THCA_unc.edu.44ba29fa-b4d1-461b-86b4-fb9730e701f4.1227199.rsem.isoforms.results	f2ad720e-579f-4e2c-a3f0-17877ca91067	c73.9	1941	null	null	null	null	null	null	null	Primary Tumor	notreported	25232	alive	null	null	null	1442.0	null	null	1af65471-c0f9-5b28-8382-c467d3d10459	c73.9	notreported	-25232	notreported	notreported
LGG	c71.0	female	notreported	nothispanicorlatino	white	LGG_unc.edu.28107f81-2e82-4bc9-99e4-f1b24444c811.2358322.rsem.isoforms.results	7883e417-a793-4614-9528-6c2e9e44379f	c71.0	1960	null	null	null	null	null	null	null	Primary Tumor	notreported	16275	dead	null	961.0	null	null	null	null	2b72d089-597a-5b1a-9032-a1262c9e4464	c71.0	notreported	-16275	notreported	notreported
BLCA	c67.9	male	stageiv	notreported	white	BLCA_unc.edu.210311b9-88d7-4e29-974a-0e807ea88d1b.2497532.rsem.isoforms.results	8b091ac3-d03a-4dd2-bdde-f7f5c6987155	c67.9	1947	null	63.0	null	null	0.00228625344752504	null	166.0	Primary Tumor	notreported	22397	alive	null	null	null	460.0	null	null	fbe33907-29de-5475-8050-7ac2a6487aa6	c67.9	notreported	-22397	notreported	notreported
THCA	c73	male	stagei	nothispanicorlatino	white	THCA_unc.edu.9499982c-311d-40cd-8353-dd21c6b18d0d.1276342.rsem.isoforms.results	3597af5e-65ff-40a7-95fc-dacc26cbca14	c73.9	1968	null	null	null	null	null	null	null	Primary Tumor	notreported	15418	alive	null	null	null	183.0	null	null	fa7fb600-8644-5ced-b749-1fea0c0a3543	c73.9	notreported	-15418	notreported	notreported
LGG	c71.0	female	notreported	nothispanicorlatino	blackorafricanamerican	LGG_unc.edu.6967eb73-0b93-48d3-bb43-583652eef2a4.2339788.rsem.isoforms.results	3ac41cc6-5dfb-40a1-bd13-5dc7ca2bb6f3	c71.0	1961	null	null	null	null	null	null	null	Primary Tumor	notreported	11330	dead	null	2235.0	null	null	null	null	cc6f4146-96f8-5fec-9ad8-d0e052a0e4ff	c71.0	notreported	-11330	notreported	notreported
LGG	c71.0	female	notreported	nothispanicorlatino	white	LGG_unc.edu.2181e8a6-db87-49e9-ad56-582b345abcc2.1858829.rsem.isoforms.results	e669a4b7-a494-490a-b78c-e664c59d0697	c71.0	1968	null	null	null	null	null	null	null	Primary Tumor	notreported	13753	dead	null	1933.0	null	null	null	null	c5832596-7321-5545-8285-d423e32d8452	c71.0	notreported	-13753	notreported	notreported
LGG	c71.0	male	notreported	hispanicorlatino	white	LGG_unc.edu.97d4524f-bd35-4dfe-9ef5-e1298713aaa4.1566184.rsem.isoforms.results	a5f851c5-6130-4ea1-9f86-be59331a92f7	c71.0	1966	null	null	null	null	null	null	null	Primary Tumor	notreported	15900	dead	null	578.0	null	null	null	null	60e2cb03-9558-5765-94fb-dee1a5a43f66	c71.0	notreported	-15900	notreported	notreported
LGG	c71.1	male	notreported	nothispanicorlatino	white	LGG_unc.edu.10bc3c22-c4ff-4d44-a44b-dc8dd2cbec2d.1982080.rsem.isoforms.results	7704e4a8-c7aa-4288-b1ed-68c23abbe924	c71.1	1972	null	null	null	null	null	null	null	Primary Tumor	notreported	12550	alive	null	null	null	2219.0	null	null	4acb8d16-0cea-5085-9711-22296001ecc9	c71.1	notreported	-12550	notreported	notreported
BLCA	c67.9	female	stageiv	nothispanicorlatino	blackorafricanamerican	BLCA_unc.edu.b660dd38-f986-4143-9445-b66cb60f42dd.2166895.rsem.isoforms.results	acf6bdf3-6349-49dc-b99a-4eda648eeac5	c67.9	1923	null	132.0	null	null	0.006831944516329382	null	139.0	Primary Tumor	notreported	32872	alive	null	null	null	423.0	null	null	100ac192-0981-58ec-8734-b54512416b2e	c67.9	notreported	-32872	notreported	notreported
THCA	c73	female	stageiii	nothispanicorlatino	white	THCA_unc.edu.04821584-22a4-4717-98f4-328d953719ef.1273700.rsem.isoforms.results	3e9fda23-676d-4e78-8948-0c9df3d10064	c73.9	1944	null	null	null	null	null	null	null	Primary Tumor	notreported	24020	alive	null	null	null	1090.0	null	null	f495364a-01bd-55f9-810e-390a0e230c4a	c73.9	notreported	-24020	notreported	notreported
THCA	c73	female	stagei	nothispanicorlatino	blackorafricanamerican	THCA_unc.edu.ff3a57b6-ea37-4002-92a6-20e33abf98e1.1657862.rsem.isoforms.results	97d0e1bb-1459-4124-b25a-48195f2ad8b5	c73.9	1964	null	null	null	null	null	null	null	Solid Tissue Normal	notreported	14025	alive	null	null	null	3941.0	null	null	c0612ba6-90fd-550e-8d41-d794150c04fa	c73.9	notreported	-14025	notreported	notreported
GBM	c71.9	male	notreported	nothispanicorlatino	white	GBM_unc.edu.eab1e09d-1ca3-484d-95d8-9fd5fa857f3d.1535363.rsem.isoforms.results	1b25795e-69ad-47fd-bb2f-94ff0910fae1	c71.9	1942	null	null	null	null	null	null	null	Primary Tumor	notreported	24658	dead	null	766.0	null	644.0	null	null	a9f78259-a67b-55ea-b11e-b80ff9c8e725	c71.9	notreported	-24658	notreported	notreported
BLCA	c67.9	male	stageii	nothispanicorlatino	white	BLCA_unc.edu.f29aacd1-503d-4f56-8faa-2ba309ce4f23.2504480.rsem.isoforms.results	aeb08986-a802-43dd-a5b4-17f4ec018790	c67.9	1938	3.1780821917808217	63.0	null	null	0.002010916403332376	null	177.0	Primary Tumor	notreported	27537	alive	null	null	null	642.0	null	null	c27f6068-7756-57c1-a92a-b60313f6f7b5	c67.9	notreported	-27537	notreported	notreported
THCA	c73	female	stagei	notreported	notreported	THCA_unc.edu.f2675b47-1187-4dad-a53d-60179daa7c88.1277905.rsem.isoforms.results	7244b7db-8282-43aa-a4b4-ad6af972cf9b	c73.9	1971	null	null	null	null	null	null	null	Primary Tumor	notreported	14776	alive	null	null	null	374.0	null	null	7e8473ca-0f96-5b9c-8e6c-1cee8f40305f	c73.9	notreported	-14776	notreported	notreported
OV	c48.1	female	notreported	notreported	white	OV_unc.edu.a3173b33-aa16-48a2-b733-0345aad49755.1522746.rsem.isoforms.results	2b14123b-8fcd-402c-9399-4e7c47f20252	c48.1	1941	null	null	null	null	null	null	null	Primary Tumor	notreported	20530	dead	null	1102.0	null	1102.0	null	null	608d39b1-f3d7-5c83-a83a-61248eacbd74	c48.1	notreported	-20530	notreported	notreported
BLCA	c67.1	female	stageiii	nothispanicorlatino	white	BLCA_unc.edu.d74030bf-dfa1-4f65-9596-fd505733139e.1475634.rsem.isoforms.results	6bddafde-7004-49b6-80cf-8081cd4b7d44	c67.1	1931	1.095890410958904	null	null	null	null	null	null	Primary Tumor	notreported	28757	alive	null	null	null	2009.0	null	null	e0f85963-d687-5b3c-8e05-a506208dfb7d	c67.1	notreported	-28757	notreported	notreported
LGG	c71.0	male	notreported	nothispanicorlatino	white	LGG_unc.edu.3fa4bf80-8a79-4a49-9b1e-40cf5696ad28.2331278.rsem.isoforms.results	288f6c7e-d96f-4be1-8312-77c67f75c467	c71.0	1967	null	null	null	null	null	null	null	Primary Tumor	notreported	16415	alive	null	null	null	1058.0	null	null	d2cb3db4-6192-5dc8-8db9-de4cee2f66cb	c71.0	notreported	-16415	notreported	notreported
BLCA	c67.9	male	stageii	nothispanicorlatino	white	BLCA_unc.edu.74cbc344-560b-439b-bd14-1542ce579967.2158435.rsem.isoforms.results	04b9090a-e8ef-4f52-bc52-af90caa84168	c67.9	1941	3.1780821917808217	87.0	null	null	0.0030103806228373702	null	170.0	Primary Tumor	notreported	25672	alive	null	null	null	372.0	null	null	be949c12-6df5-534d-b69f-932db993097a	c67.9	notreported	-25672	notreported	notreported
LGG	c71.0	male	notreported	nothispanicorlatino	white	LGG_unc.edu.75016f4c-257e-4e24-9e91-5ab4b8c53e5a.1816262.rsem.isoforms.results	d766c3af-f0b3-4791-a754-d6546d370f8f	c71.0	1957	null	null	null	null	null	null	null	Primary Tumor	notreported	20041	alive	null	null	null	190.0	null	null	b5e57b4c-dfe4-5a76-b234-89da72645a85	c71.0	notreported	-20041	notreported	notreported
LGG	c71.0	female	notreported	nothispanicorlatino	white	LGG_unc.edu.16b68870-facd-4071-ba84-b30b2c60bc81.2167011.rsem.isoforms.results	ea31c705-4cf8-48f5-8d13-e43563213c91	c71.0	1969	null	null	null	null	null	null	null	Primary Tumor	notreported	16106	alive	null	null	null	500.0	null	null	41f39833-c79f-57c2-8eb4-5ec8ee3564b3	c71.0	notreported	-16106	notreported	notreported
BLCA	c67.9	female	stageiv	nothispanicorlatino	white	BLCA_unc.edu.518085b3-f993-4346-bb4d-b7244e9435d6.1244605.rsem.isoforms.results	c728fac9-5452-4759-a4ed-a366e0f757cb	c67.9	1930	1.095890410958904	52.5	null	null	0.0024295432458697765	null	147.0	Primary Tumor	notreported	29332	dead	null	1420.0	null	55.0	null	null	932992c1-5ff8-5c37-9f93-019b4bae0d08	c67.9	notreported	-29332	notreported	notreported
GBM	c71.9	male	notreported	nothispanicorlatino	white	GBM_unc.edu.612ef912-5a28-4c11-8703-3376f51afef5.1542051.rsem.isoforms.results	74139255-a635-4c87-814d-3dd04ed630a8	c71.9	1944	null	null	null	null	null	null	null	Primary Tumor	notreported	22835	dead	null	317.0	null	313.0	null	null	93a4b78d-276b-560f-82aa-4189c66bba15	c71.9	notreported	-22835	notreported	notreported
THCA	c73	male	stageiii	nothispanicorlatino	white	THCA_unc.edu.77a2cb06-217f-4f5d-a799-d0cfdc244de1.1654443.rsem.isoforms.results	76c4d298-6f17-4f11-a706-cd844a0e0914	c73.9	1957	null	null	null	null	null	null	null	Primary Tumor	notreported	19870	alive	null	null	null	818.0	null	null	3568aecd-2390-5041-906a-ccbf03c64b8e	c73.9	notreported	-19870	notreported	notreported
GBM	c71.9	male	notreported	nothispanicorlatino	blackorafricanamerican	GBM_unc.edu.84d56a0b-6ee1-4fe7-9491-d8815af1d6f5.1540573.rsem.isoforms.results	6c28f086-6a25-40b6-93eb-bba0014acda6	c71.9	1932	null	null	null	null	null	null	null	Primary Tumor	notreported	27980	dead	null	33.0	null	33.0	null	null	017a4a97-b356-54ce-ba44-1c025dfa6fd7	c71.9	notreported	-27980	notreported	notreported
BLCA	c67.9	male	stageiv	hispanicorlatino	white	BLCA_unc.edu.fb37dcdd-00a6-49b7-b0ca-1fe0d9c4782a.2647622.rsem.isoforms.results	fe33e5e0-a54d-481a-897c-e32b4708da69	c67.9	null	1.36986301369863	55.0	null	null	0.002203172568498638	null	158.0	Primary Tumor	notreported	23360	alive	null	null	null	2109.0	null	null	c431ed8f-9ac4-5968-9c1a-d13e5efc39bf	c67.9	notreported	-23360	notreported	notreported
BLCA	c67.2	male	stageii	nothispanicorlatino	asian	BLCA_unc.edu.2ee1e299-76a9-4d45-a79b-02c1f31f9399.2396920.rsem.isoforms.results	25ac9acd-328b-4fae-a448-4f3957b1b212	c67.2	1959	null	56.0	null	null	0.0020322252866889243	null	166.0	Primary Tumor	notreported	20059	alive	null	null	null	368.0	null	null	9a17aeae-dc7d-55ec-acc9-bc6779a000ee	c67.2	notreported	-20059	notreported	notreported
LGG	c71.0	female	notreported	nothispanicorlatino	white	LGG_unc.edu.eba2b96d-21f8-4091-b8c4-0ef2b9c00075.2167052.rsem.isoforms.results	ae4f0714-3b74-46c0-9c1b-f028c7cf2e62	c71.0	1960	null	null	null	null	null	null	null	Primary Tumor	notreported	19138	alive	null	null	null	677.0	null	null	b1248fb0-e399-5833-9067-a7f201293805	c71.0	notreported	-19138	notreported	notreported
BLCA	c67.9	male	stageii	nothispanicorlatino	white	BLCA_unc.edu.1002d9de-3bd1-4d22-8f2a-64b3114264e0.2032134.rsem.isoforms.results	ec7fc492-53cc-4b71-a66a-1cef1adeba33	c67.9	1957	null	86.0	null	null	0.002568007405416704	null	183.0	Primary Tumor	notreported	20746	alive	null	null	null	474.0	null	null	de2ca3a5-c008-5a29-974a-beb6c45098be	c67.9	notreported	-20746	notreported	notreported
THCA	c73	female	stageiii	notreported	notreported	THCA_unc.edu.67107614-9a9d-4d62-9c2e-3b8e242ac92d.1660512.rsem.isoforms.results	3a211d5a-085f-4902-86b6-50e4eb36b897	c73.9	1965	null	null	null	null	null	null	null	Primary Tumor	notreported	16842	alive	null	null	null	223.0	null	null	b914199d-4c89-5ea0-8ef1-e0c9a31bf848	c73.9	notreported	-16842	notreported	notreported
BLCA	c67.2	male	stageii	nothispanicorlatino	white	BLCA_unc.edu.81741a67-7bfd-46c5-8784-a4c87eb71c5e.2543529.rsem.isoforms.results	104c8e20-1b29-4d77-9633-359a35be48fb	c67.2	1949	0.821917808219178	94.0	null	null	0.0029337411441590464	null	179.0	Primary Tumor	notreported	23611	alive	null	null	null	578.0	null	null	cc4d4253-bc86-55ad-9f8e-70d5c673d460	c67.2	notreported	-23611	notreported	notreported
THCA	c73	female	stagei	hispanicorlatino	white	THCA_unc.edu.35b40466-674d-4909-aec0-0067f8f6f00c.1327345.rsem.isoforms.results	3a7c35e0-9ed1-4098-8585-52f5991b2534	c73.9	1976	null	null	null	null	null	null	null	Primary Tumor	notreported	11822	alive	null	null	null	1488.0	null	null	631e63d1-6bdf-5e70-a73c-fbb8a396e00a	c73.9	notreported	-11822	notreported	notreported
LGG	c71.0	female	notreported	nothispanicorlatino	white	LGG_unc.edu.063e82c8-a923-4ca5-94cb-9fce3cccd226.2325818.rsem.isoforms.results	a0672f6f-6406-4d49-96d0-6afd571bbd00	c71.0	1929	null	null	null	null	null	null	null	Primary Tumor	notreported	26766	dead	null	547.0	null	null	null	null	8f12e363-9856-56b4-bbd9-4f378ecb8e32	c71.0	notreported	-26766	notreported	notreported
THCA	c73	female	stagei	nothispanicorlatino	white	THCA_unc.edu.34f062f8-e5c5-4bb3-9778-d2cf440a4178.1816825.rsem.isoforms.results	980d1c65-b675-4568-9ce8-c0278686ae8d	c73.9	1959	null	null	null	null	null	null	null	Primary Tumor	notreported	19159	alive	null	null	null	1085.0	null	null	8fb25499-61a2-5157-a865-70e2f0788fd2	c73.9	notreported	-19159	notreported	notreported
BLCA	c67.9	female	stageii	hispanicorlatino	notreported	BLCA_unc.edu.7bee34e3-b559-48e9-bbc3-2d162b8f128a.2440633.rsem.isoforms.results	90bf49b7-6710-4665-82df-30ecc22c59a3	c67.9	1956	1.095890410958904	73.0	null	null	0.002383673469387755	null	175.0	Primary Tumor	notreported	18544	alive	null	null	null	1370.0	null	null	6770a9aa-47af-55fa-b91b-ee7f2b4a4e3d	c67.9	notreported	-18544	notreported	notreported
GBM	c71.9	female	notreported	nothispanicorlatino	white	GBM_unc.edu.82d0310c-7bd8-422e-97a7-7e73be8d8a30.1540227.rsem.isoforms.results	2f61ea6b-a3f2-477f-ab98-47ed07b3b2cd	c71.9	1974	null	null	null	null	null	null	null	Primary Tumor	notreported	12529	dead	null	442.0	null	357.0	null	null	6ea7714a-9870-5f52-b305-a863d4aa9632	c71.9	notreported	-12529	notreported	notreported
THCA	c73	female	stagei	nothispanicorlatino	white	THCA_unc.edu.889cd706-f713-482b-9c49-fe531d5dd4e1.1456306.rsem.isoforms.results	b107b012-335a-4282-a7aa-273b740831f1	c73.9	1973	null	null	null	null	null	null	null	Primary Tumor	notreported	11598	alive	null	null	null	3501.0	null	null	9858a00d-6208-5736-b880-9e296f4c2521	c73.9	notreported	-11598	notreported	notreported
LGG	c71.0	female	notreported	nothispanicorlatino	white	LGG_unc.edu.108d720f-7f3f-481e-ad11-5a30f4c4f9a4.2330851.rsem.isoforms.results	41fbb9f1-4a13-48ab-8649-0608c89cdd9f	c71.0	1964	null	null	null	null	null	null	null	Primary Tumor	notreported	17800	alive	null	null	null	908.0	null	null	3c2b37e5-d359-5ba9-bcf0-093ba4e34c0d	c71.0	notreported	-17800	notreported	notreported
THCA	c73	male	stageiva	nothispanicorlatino	white	THCA_unc.edu.04f1e2d6-dda4-4346-978c-aa71cbfc880a.1661503.rsem.isoforms.results	82dd133b-691b-4bbf-b948-6270869d9b69	c73.9	1962	null	null	null	null	null	null	null	Primary Tumor	notreported	18068	alive	null	null	null	71.0	null	null	fedccdc2-4081-541d-8be3-236fea42f025	c73.9	notreported	-18068	notreported	notreported
THCA	c73	female	stageiii	notreported	notreported	THCA_unc.edu.2c8cb0d0-2e13-4ec6-b097-f82645d47b2e.1661483.rsem.isoforms.results	2b84cfbc-7cf6-4cb1-a1e3-ba85dafb89f4	c73.9	1956	null	null	null	null	null	null	null	Primary Tumor	notreported	20349	alive	null	null	null	457.0	null	null	f9711569-7570-5c29-a9e9-da2a3cf9d168	c73.9	notreported	-20349	notreported	notreported
THCA	c73	female	stageiii	nothispanicorlatino	white	THCA_unc.edu.3dbb7586-0e8d-41ff-aa57-ab701b892784.1816849.rsem.isoforms.results	c5d08be7-b94c-423a-aea8-bbc635787c63	c73.9	1961	null	null	null	null	null	null	null	Primary Tumor	notreported	18767	alive	null	null	null	470.0	null	null	75008a47-4707-5d5e-ad96-ad7a31c6847a	c73.9	notreported	-18767	notreported	notreported
BLCA	c67.9	male	stageiii	nothispanicorlatino	white	BLCA_unc.edu.433eed62-f9d3-440a-bc04-f0156c70ee65.2167059.rsem.isoforms.results	aadcf26b-c398-489f-a86a-e8db1b5db456	c67.9	1948	2.4657534246575343	57.0	null	null	0.0019267171444023797	null	172.0	Primary Tumor	notreported	23631	alive	null	null	null	67.0	null	null	74767c77-1c23-5151-9559-5f94b20893e7	c67.9	notreported	-23631	notreported	notreported
THCA	c73	female	stagei	notreported	blackorafricanamerican	THCA_unc.edu.237aa00b-7c17-45ef-a95e-396565c7b581.1881561.rsem.isoforms.results	52bc133b-8a10-4c9b-adc3-22910a191e6b	c73.9	1961	null	null	null	null	null	null	null	Primary Tumor	notreported	16961	alive	null	null	null	2658.0	null	null	72ba661b-95f7-5b14-adf9-5eefa553dcbd	c73.9	notreported	-16961	notreported	notreported
THCA	c73	male	stageiii	nothispanicorlatino	notreported	THCA_unc.edu.a6d66740-e560-42dc-9aac-4ad00649e361.1658607.rsem.isoforms.results	b305b716-5ae5-421b-b3c9-0824d37b08a8	c73.9	1959	null	null	null	null	null	null	null	Primary Tumor	notreported	19248	alive	null	null	null	697.0	null	null	086b3ae6-fc81-5703-8a76-08cf018a2282	c73.9	notreported	-19248	notreported	notreported
THCA	c73	female	stagei	nothispanicorlatino	white	THCA_unc.edu.26f7fe10-3c77-4b38-ac26-627e54f3b0d1.1457804.rsem.isoforms.results	2fa2dd09-593a-4cde-97c7-61cdb8ba2bfe	c73.9	1967	null	null	null	null	null	null	null	Solid Tissue Normal	notreported	12665	alive	null	null	null	4258.0	null	null	1ee7ecdb-421f-5be9-b264-dccd4cfd2c57	c73.9	notreported	-12665	notreported	notreported
THCA	c73	female	stagei	nothispanicorlatino	white	THCA_unc.edu.cd342b71-4d9c-42bc-95e6-e9ef31124811.1326624.rsem.isoforms.results	4e959d61-4f7f-4933-bada-d33a621d9c03	c73.9	1938	null	null	null	null	null	null	null	Primary Tumor	notreported	26478	alive	null	null	null	1528.0	null	null	3ac6701a-156c-5ce6-a2a5-0f7fd77fb77d	c73.9	notreported	-26478	notreported	notreported
BLCA	c67.2	male	stageiv	nothispanicorlatino	white	BLCA_unc.edu.c4cd3829-e7e0-4f1e-8796-856fddcf50ae.2470534.rsem.isoforms.results	65d1eaec-28db-4a41-a4db-1a710fcb24ad	c67.2	1945	3.3972602739726026	130.0	null	null	0.003757659845068794	null	186.0	Primary Tumor	notreported	24428	dead	null	364.0	null	null	null	null	19099413-ca2c-53af-9e86-cfb23d26842d	c67.2	notreported	-24428	notreported	notreported
BLCA	c67.9	female	stageii	nothispanicorlatino	white	BLCA_unc.edu.8c50bd9a-1849-4466-aab6-da20488610f9.2651333.rsem.isoforms.results	c8388ac0-975d-4f1e-8324-8cabdc75738d	c67.9	1942	null	67.0	null	null	0.0026171875	null	160.0	Primary Tumor	notreported	23448	dead	null	2828.0	null	null	null	null	ec47a9f9-5a5c-5d4d-ab6f-094f8ed7bb11	c67.9	notreported	-23448	notreported	notreported
BLCA	c67.2	male	stageii	nothispanicorlatino	white	BLCA_unc.edu.d4a3d2d7-35c6-40b5-9e67-093f4f5834a4.1179779.rsem.isoforms.results	4dc5cffe-ed8c-47ab-b5fc-f9615b5414f7	c67.2	1938	null	null	null	null	null	null	null	Solid Tissue Normal	notreported	26078	dead	null	254.0	null	null	null	null	1a57505d-1a54-5aad-a8ff-dbd1955dd062	c67.2	notreported	-26078	notreported	notreported
OV	c56.9	female	notreported	nothispanicorlatino	americanindianoralaskanative	OV_unc.edu.ae1e5f8d-cdd9-41f5-b56c-80dfe27e1b6c.2723200.rsem.isoforms.results	818dc159-aba4-46bc-a4ed-68ee0f8c4461	c56.9	1946	null	null	null	null	null	null	null	Primary Tumor	notreported	22127	dead	null	396.0	null	396.0	null	null	2a402414-8c80-5260-9406-443e0dadda66	c56.9	notreported	-22127	notreported	notreported
BLCA	c67.9	female	stageii	nothispanicorlatino	white	BLCA_unc.edu.2c9b61fa-9d26-41fe-9d79-a34bd08182f1.2469623.rsem.isoforms.results	284e175c-3229-4fee-a627-a49eac538e3a	c67.9	1932	null	62.0	null	null	0.0022773186409550047	null	165.0	Primary Tumor	notreported	28622	dead	null	106.0	null	null	null	null	ec24a84e-bd6e-5518-a4b3-283aa86eb4ae	c67.9	notreported	-28622	notreported	notreported
BLCA	c67.9	male	stageiv	nothispanicorlatino	white	BLCA_unc.edu.ed035849-50d7-4ce5-93fd-88a7735a8c92.2651548.rsem.isoforms.results	24ad2168-b25a-4de8-a021-dfe1c74fcc6e	c67.9	1931	null	56.0	null	null	0.001984126984126984	null	168.0	Primary Tumor	notreported	27909	alive	null	null	null	2625.0	null	null	2412d52a-fa7e-54d0-bd9e-57d3ace784cb	c67.9	notreported	-27909	notreported	notreported
BLCA	c67.9	female	stageii	hispanicorlatino	white	BLCA_unc.edu.20d3ac92-e654-415e-8031-5a8bdd1662b3.1474679.rsem.isoforms.results	d53eade8-a845-4252-aece-92f3573486a7	c67.9	1934	4.383561643835616	null	null	null	null	null	null	Solid Tissue Normal	notreported	28444	alive	null	null	null	646.0	null	null	17b6a319-ca82-5b6a-bfc6-ce2fc1b50c34	c67.9	notreported	-28444	notreported	notreported
THCA	c73	male	stageivc	notreported	notreported	THCA_unc.edu.cd4545b1-1add-488f-80dc-17edaeb7cad6.1372256.rsem.isoforms.results	4aed5116-d27b-4911-b310-05c2248b861f	c73.9	1948	null	null	null	null	null	null	null	Primary Tumor	notreported	22817	alive	null	null	null	715.0	null	null	8d5f186f-6ac9-5926-a588-4c95dea12185	c73.9	notreported	-22817	notreported	notreported
THCA	c73	female	stageiii	notreported	white	THCA_unc.edu.54e48c8b-068a-4548-a31d-82ec1128a58e.1665919.rsem.isoforms.results	4e227a7a-b885-4e9b-a4c2-aad9e6c154e5	c73.9	1962	null	null	null	null	null	null	null	Primary Tumor	notreported	17416	alive	null	null	null	968.0	null	null	6bf67fd0-6104-5de1-b853-c33db090d49f	c73.9	notreported	-17416	notreported	notreported
LGG	c71.0	female	notreported	nothispanicorlatino	white	LGG_unc.edu.ab2b78d1-773b-4935-b458-60befcf470af.1409878.rsem.isoforms.results	9239a22e-80b1-49a2-b0d5-cbab7e415254	c71.0	1949	null	null	null	null	null	null	null	Primary Tumor	notreported	18686	dead	null	605.0	null	null	null	null	625001db-c6f4-5691-b034-d85e9f919ac6	c71.0	notreported	-18686	notreported	notreported
LGG	c71.9	female	notreported	nothispanicorlatino	white	LGG_unc.edu.10fb1701-1d93-4b24-aa8b-2814e80de197.1376280.rsem.isoforms.results	b95afb1a-a1df-4d85-ad34-191928e28a77	c71.9	1953	null	null	null	null	null	null	null	Primary Tumor	notreported	21106	alive	null	null	null	257.0	null	null	f99f086e-e9ec-5688-9c4e-4ff9ed254ef6	c71.9	notreported	-21106	notreported	notreported
OV	c56.9	female	notreported	nothispanicorlatino	white	OV_unc.edu.929c2bc4-4cee-4f82-b336-918fe041a588.1526621.rsem.isoforms.results	20c6be4d-7baf-4ea0-93e2-a5212f2e9b9c	c56.9	1925	null	null	null	null	null	null	null	Primary Tumor	notreported	29830	alive	null	null	null	932.0	null	null	c2f4be9a-f3ef-5c78-b92f-88a7763041f2	c56.9	notreported	-29830	notreported	notreported
THCA	c73	female	stagei	notreported	notreported	THCA_unc.edu.17123af6-1425-4125-9579-00c6800227c7.1663855.rsem.isoforms.results	97b5017c-2066-4472-ab3f-31cfe64a6762	c73.9	1978	null	null	null	null	null	null	null	Primary Tumor	notreported	12405	alive	null	null	null	15.0	null	null	d289b1ec-0149-5e7e-951a-147f0eb22074	c73.9	notreported	-12405	notreported	notreported
BLCA	c67.9	male	stageii	nothispanicorlatino	white	BLCA_unc.edu.530bf880-039e-490c-8a9d-a27bc9b3d918.2509251.rsem.isoforms.results	371b5d70-9797-4dae-b523-247f5eaeb4ab	c67.9	1929	null	null	null	null	null	null	null	Primary Tumor	notreported	30398	alive	null	null	null	921.0	null	null	668f21fa-d257-547f-ad24-de9bfa24febb	c67.9	notreported	-30398	notreported	notreported
OV	c56.9	female	notreported	nothispanicorlatino	white	OV_unc.edu.bf909020-d6a1-49f1-8007-4192d39abd04.1526046.rsem.isoforms.results	07fbdb3c-8337-4319-8255-f2363f8a031e	c56.9	1948	null	null	null	null	null	null	null	Primary Tumor	notreported	21582	alive	null	null	null	848.0	null	null	947ce4f7-c76d-587a-af7d-533e4eeb9b1f	c56.9	notreported	-21582	notreported	notreported
BLCA	c67.4	male	stageiii	nothispanicorlatino	white	BLCA_unc.edu.b68f9935-3265-4930-a221-61bc9f8e2eda.2282043.rsem.isoforms.results	e44f60ec-66c4-45a2-a003-0a1faf1d6e03	c67.4	1937	2.191780821917808	75.4	null	null	0.002519295666410505	null	173.0	Primary Tumor	notreported	27194	dead	null	539.0	null	319.0	null	null	b61ff74e-8858-5979-a67a-37346b38e5c4	c67.4	notreported	-27194	notreported	notreported
LGG	c71.9	female	notreported	nothispanicorlatino	white	LGG_unc.edu.5966170d-1c88-4b55-ad39-2ace3c9230d3.1554210.rsem.isoforms.results	55c78413-d102-4113-930e-6d842862fe75	c71.9	1970	null	null	null	null	null	null	null	Primary Tumor	notreported	14802	alive	null	null	null	531.0	null	null	bd7b5d7b-e897-5c16-8567-1975a2557a73	c71.9	notreported	-14802	notreported	notreported
LGG	c71.0	male	notreported	hispanicorlatino	white	LGG_unc.edu.76a648cc-8673-478f-a2f5-c0830378f1e4.2334314.rsem.isoforms.results	607b1f22-b744-43c5-91f7-fc69142ba30e	c71.0	1974	null	null	null	null	null	null	null	Primary Tumor	notreported	14022	alive	null	null	null	787.0	null	null	50758696-e257-5894-981e-9a9fb0b24b30	c71.0	notreported	-14022	notreported	notreported
OV	c56.9	female	notreported	notreported	white	OV_unc.edu.ea119111-5217-4b8a-88e0-36dc77782241.1523364.rsem.isoforms.results	5abb6d80-fc39-49a4-8db5-3db24543feb6	c56.9	1953	null	null	null	null	null	null	null	Recurrent Tumor	notreported	20015	alive	null	null	null	741.0	null	null	05b7bdb6-00fc-573b-88b0-3985a0a97199	c56.9	notreported	-20015	notreported	notreported
THCA	c73	male	stagei	notreported	notreported	THCA_unc.edu.1826da69-3d45-4607-820b-47fb71d60812.1902725.rsem.isoforms.results	e0ab95ef-5c96-4d00-8950-04e26e3b4672	c73.9	1940	null	null	null	null	null	null	null	Primary Tumor	notreported	26589	alive	null	null	null	802.0	null	null	3b8bddd7-ee8d-5f7a-8e74-d3b9f4ee0e03	c73.9	notreported	-26589	notreported	notreported
LGG	c71.0	male	notreported	nothispanicorlatino	white	LGG_unc.edu.47b76f26-6ac6-482c-bb3d-315a18400927.2332290.rsem.isoforms.results	992452ee-8d9f-406b-9708-7bcb60062743	c71.0	1950	null	null	null	null	null	null	null	Primary Tumor	notreported	16770	dead	null	2282.0	null	null	null	null	e0889fbc-546b-552f-b37e-21a8bc87a376	c71.0	notreported	-16770	notreported	notreported
LGG	c71.9	female	notreported	nothispanicorlatino	white	LGG_unc.edu.0270b7ae-ef7f-4dd7-b019-3e10afa191ff.1659925.rsem.isoforms.results	334f715e-08dc-4a29-b8e4-b010b829c478	c71.9	1974	null	null	null	null	null	null	null	Primary Tumor	notreported	11509	alive	null	null	null	3574.0	null	null	05591a01-6481-5334-a7bb-107b22ef46da	c71.9	notreported	-11509	notreported	notreported
BLCA	c67.4	male	stageii	nothispanicorlatino	white	BLCA_unc.edu.406a8f7c-1530-4ecf-95b0-b051d9a3184d.2506724.rsem.isoforms.results	bc6c516b-591e-4950-b6b0-decafa666f4e	c67.4	1923	null	80.0	null	null	0.0024691358024691358	null	180.0	Primary Tumor	notreported	30520	alive	null	null	null	3314.0	null	null	221fcfab-23ac-5525-a3df-45d1900cd9dd	c67.4	notreported	-30520	notreported	notreported
LGG	c71.0	male	notreported	hispanicorlatino	white	LGG_unc.edu.44347235-2162-41f1-892e-1cf85f157ece.2334527.rsem.isoforms.results	5a3edeb6-133e-4116-9f80-2485bd70754d	c71.0	1982	null	null	null	null	null	null	null	Primary Tumor	notreported	10167	alive	null	null	null	1868.0	null	null	7c748bf5-0836-5c3f-bb7b-34c602facca3	c71.0	notreported	-10167	notreported	notreported
THCA	c73	female	stageii	notreported	white	THCA_unc.edu.865c259f-80d6-4f88-b5d1-14d8d6e7f2e6.1903471.rsem.isoforms.results	29963391-3926-4b7c-8066-185f0f2d5bfc	c73.9	1967	null	null	null	null	null	null	null	Primary Tumor	notreported	16685	alive	null	null	null	955.0	null	null	23c39874-ce83-5229-b7da-fef663a142b7	c73.9	notreported	-16685	notreported	notreported
LGG	c71.0	male	notreported	nothispanicorlatino	white	LGG_unc.edu.fe9eb79d-a750-4830-9db4-32ea4034cb39.1569132.rsem.isoforms.results	145f87a3-5e86-4a87-8e49-b166a2271d02	c71.0	1928	null	null	null	null	null	null	null	Primary Tumor	notreported	25266	dead	null	242.0	null	null	null	null	eb800b0b-f0bd-5169-af6e-9a68bbdbee72	c71.0	notreported	-25266	notreported	notreported
BLCA	c67.9	male	stageiv	nothispanicorlatino	white	BLCA_unc.edu.538ad820-310d-4463-83a2-44ce1cac920c.2115711.rsem.isoforms.results	39fdc742-8bdb-4e77-b20b-0f967a75e659	c67.9	1934	null	68.0	null	null	0.0020987654320987655	null	180.0	Primary Tumor	notreported	28793	alive	null	null	null	466.0	null	null	a01c300b-a9ed-58b0-85c4-7ce6e333ef11	c67.9	notreported	-28793	notreported	notreported
LGG	c71.0	female	notreported	nothispanicorlatino	white	LGG_unc.edu.6297b8d1-8f4e-499c-b95f-422f0a574b35.2412538.rsem.isoforms.results	c0d47e0f-4918-4e06-9db6-201671b1259c	c71.0	1976	null	null	null	null	null	null	null	Recurrent Tumor	notreported	9021	dead	null	4068.0	null	null	null	null	9e2c8f99-8d0f-5304-95a5-ae41e113650c	c71.0	notreported	-9021	notreported	notreported
GBM	c71.9	female	notreported	nothispanicorlatino	white	GBM_unc.edu.b1019532-963f-4c8e-ba55-b03dea8b5498.1537411.rsem.isoforms.results	74ce7e7f-e214-4b6e-8551-114a153ab7fb	c71.9	1965	null	null	null	null	null	null	null	Primary Tumor	notreported	16572	alive	null	null	null	155.0	null	null	d7494ff4-a9f0-530f-acf9-6d087cfbd4e0	c71.9	notreported	-16572	notreported	notreported
BLCA	c67.1	male	stageiii	nothispanicorlatino	white	BLCA_unc.edu.312ea080-3831-453d-aa8c-e466192c8309.1247471.rsem.isoforms.results	797a71ee-372d-41e5-aeee-5ab3c4661110	c67.1	1956	2.191780821917808	95.0	null	null	null	null	null	Primary Tumor	notreported	20032	alive	null	null	null	522.0	null	null	44193ccb-a51c-5366-928c-c43c5a8284d3	c67.1	notreported	-20032	notreported	notreported
LGG	c71.0	female	notreported	notreported	white	LGG_unc.edu.f9caf12e-40d1-4eec-ae39-2067f78c86c6.1977616.rsem.isoforms.results	0639b753-4099-4ca4-adb9-763069a614ef	c71.0	1970	null	null	null	null	null	null	null	Primary Tumor	notreported	15513	alive	null	null	null	878.0	null	null	925691ea-3120-59e6-be4e-dea3b8c7d2c9	c71.0	notreported	-15513	notreported	notreported
LGG	c71.0	female	notreported	nothispanicorlatino	white	LGG_unc.edu.5089e59f-7c52-4c4d-a1f3-a4cbd84877ae.2269478.rsem.isoforms.results	1ca2e1b3-e3eb-4740-a69a-800e3eb60787	c71.0	1940	null	null	null	null	null	null	null	Primary Tumor	notreported	26992	alive	null	null	null	58.0	null	null	1b26231c-4557-5790-88aa-e1d7fe9b2f89	c71.0	notreported	-26992	notreported	notreported
BLCA	c67.2	male	stageiv	nothispanicorlatino	white	BLCA_unc.edu.6321d37f-3658-447d-96a4-099e8072217a.2306381.rsem.isoforms.results	fcda9873-3a93-40b2-913d-4df1e6a27efb	c67.2	1951	null	86.0	null	null	0.002714303749526575	null	178.0	Primary Tumor	notreported	21196	alive	null	null	null	1912.0	null	null	e022fa2c-2a15-5c85-8572-ce0adb5dd1c7	c67.2	notreported	-21196	notreported	notreported
THCA	c73	female	stagei	hispanicorlatino	white	THCA_unc.edu.5bb6bf4f-84af-4b86-9292-e56153b2a401.1566230.rsem.isoforms.results	fb14bd0d-b356-42a4-a0e9-2fcdada8f76b	c73.9	1977	null	null	null	null	null	null	null	Primary Tumor	notreported	12113	alive	null	null	null	827.0	null	null	5b766ea1-8852-54b7-9d1d-282635a4e4f1	c73.9	notreported	-12113	notreported	notreported
THCA	c73	female	stageii	nothispanicorlatino	white	THCA_unc.edu.aa9f2d19-a6b8-4d4c-8868-c6c5e1fd0e75.1457091.rsem.isoforms.results	63e8c48e-f01b-4a7f-87e2-30607a2c8f6c	c73.9	1961	null	null	null	null	null	null	null	Primary Tumor	notreported	18140	alive	null	null	null	1595.0	null	null	d625f354-0e21-5810-ba46-684f02a39e1e	c73.9	notreported	-18140	notreported	notreported
THCA	c73	female	stagei	nothispanicorlatino	white	THCA_unc.edu.1b4e42c0-c100-404f-843d-a27ea314858a.1661767.rsem.isoforms.results	02a8e937-c747-4ba1-911c-0860e62b8f83	c73.9	1979	null	null	null	null	null	null	null	Primary Tumor	notreported	12004	alive	null	null	null	1091.0	null	null	d54d4322-0e53-52a5-a59c-29a20adb3520	c73.9	notreported	-12004	notreported	notreported
THCA	c73	female	stagei	nothispanicorlatino	white	THCA_unc.edu.e59deb12-6554-4a53-80ee-ebebe64e851c.1258117.rsem.isoforms.results	a9d8f797-8a53-4be5-b957-0f1f6d080390	c73.9	1977	null	null	null	null	null	null	null	Primary Tumor	notreported	12698	alive	null	null	null	1081.0	null	null	8fe4bfbd-21b4-53d1-a289-7621912cf055	c73.9	notreported	-12698	notreported	notreported
GBM	c71.9	male	notreported	nothispanicorlatino	white	GBM_unc.edu.10c78528-13e4-4ce1-b171-939c9e4492d8.1544834.rsem.isoforms.results	054f472f-98cb-4559-b2e2-b5f800fc8eef	c71.9	1969	null	null	null	null	null	null	null	Recurrent Tumor	notreported	11333	dead	null	603.0	null	548.0	null	null	9aaead6f-bd09-5b65-84a2-fc90d216a7f3	c71.9	notreported	-11333	notreported	notreported
OV	c56.9	female	notreported	notreported	white	OV_unc.edu.dcff1416-56fd-4d8e-a472-a40a00ef3066.1518732.rsem.isoforms.results	1aea3c25-d2bc-4ff5-bc27-32e939944e9d	c56.9	1951	null	null	null	null	null	null	null	Primary Tumor	notreported	20417	dead	null	1104.0	null	1053.0	null	null	3af0fe9d-b0be-520d-93e2-62c3dde90896	c56.9	notreported	-20417	notreported	notreported
LGG	c71.9	male	notreported	nothispanicorlatino	white	LGG_unc.edu.82a92ead-9cb1-473e-9a21-a6be1ddfbaba.1567858.rsem.isoforms.results	bff37de3-dc68-4e69-bdfc-8b524dd7774f	c71.9	1967	null	null	null	null	null	null	null	Primary Tumor	notreported	14306	alive	null	null	null	2918.0	null	null	f970e5f7-e619-5799-bf3e-8c9700adc4ea	c71.9	notreported	-14306	notreported	notreported
OV	c56.9	female	notreported	nothispanicorlatino	blackorafricanamerican	OV_unc.edu.5cd7faa0-323a-4ea3-a658-859d0336e0ac.1548008.rsem.isoforms.results	cbd87697-7708-4b69-9e50-9ee474feabe1	c56.9	1947	null	null	null	null	null	null	null	Primary Tumor	notreported	21285	dead	null	637.0	null	637.0	null	null	90364ee6-2b18-5172-a7f4-b50c4343e0f4	c56.9	notreported	-21285	notreported	notreported
BLCA	c67.9	male	stageiii	nothispanicorlatino	white	BLCA_unc.edu.9e99dced-8649-4a7e-bba9-ccde95cc4045.2634305.rsem.isoforms.results	aaa55de1-8f53-4b56-ba0a-67cff909cf81	c67.9	1952	3.780821917808219	67.0	null	null	0.0022386314277122524	null	173.0	Primary Tumor	notreported	21811	alive	null	null	null	1090.0	null	null	adfc54ee-48e9-54a4-8d80-241786b77805	c67.9	notreported	-21811	notreported	notreported
LGG	c71.0	female	notreported	hispanicorlatino	white	LGG_unc.edu.d071f7d9-cc1c-4b7d-8555-b8aab5730bb6.2331362.rsem.isoforms.results	7989b7fb-b9d9-4d3f-9352-cd0c1f28d828	c71.0	1975	null	null	null	null	null	null	null	Primary Tumor	notreported	13799	alive	null	null	null	62.0	null	null	b6b0a47f-508e-510a-8f53-3c89cda9e060	c71.0	notreported	-13799	notreported	notreported
LGG	c71.0	female	notreported	nothispanicorlatino	white	LGG_unc.edu.1adce1ae-0823-4259-82bf-2b8b72827d58.2340850.rsem.isoforms.results	8b10f00f-fde6-423d-bc36-027931359a5a	c71.0	1968	null	null	null	null	null	null	null	Primary Tumor	notreported	14985	dead	null	984.0	null	null	null	null	4c7b423e-65d5-5697-81ed-c34f9a3e522f	c71.0	notreported	-14985	notreported	notreported
THCA	c73	male	stageii	nothispanicorlatino	white	THCA_unc.edu.1ba7877e-fd4e-452d-8eed-20fc9fb39698.1248957.rsem.isoforms.results	f3ee888e-5116-4313-a2f6-3b1dcc3e4bc1	c73.9	1944	null	null	null	null	null	null	null	Primary Tumor	notreported	24102	alive	null	null	null	754.0	null	null	8d9dd70a-68a3-584c-9eef-8057097d37f7	c73.9	notreported	-24102	notreported	notreported
BLCA	c67.9	female	stageii	nothispanicorlatino	blackorafricanamerican	BLCA_unc.edu.61a9951d-6005-4d5a-a7ac-1146399de61c.1212752.rsem.isoforms.results	28e25ffb-8b0c-4839-a735-ed7b78e3213a	c67.9	1952	null	70.0	null	null	0.002734375	null	160.0	Primary Tumor	notreported	21215	dead	null	696.0	null	679.0	null	null	16beb884-26da-5068-a447-d0d8ba702abd	c67.9	notreported	-21215	notreported	notreported
THCA	c73	female	stageii	notreported	notreported	THCA_unc.edu.d9296b9a-bdca-49b4-b458-40e0305822b2.1260794.rsem.isoforms.results	8a3659a8-2a85-4bab-8bf3-55795922474c	c73.9	1954	null	null	null	null	null	null	null	Primary Tumor	notreported	19366	alive	null	null	null	1734.0	null	null	88d72fee-ef4a-5d65-8dc9-fd983f3971d2	c73.9	notreported	-19366	notreported	notreported
OV	c56.9	female	notreported	nothispanicorlatino	white	OV_unc.edu.6561cdb8-8499-41a6-8a79-ef0119e34c66.1548913.rsem.isoforms.results	88180134-710f-46ea-9b06-5e5d860d6d9f	c56.9	1942	null	null	null	null	null	null	null	Primary Tumor	notreported	20718	dead	null	1354.0	null	1354.0	null	null	1e51ebe2-c57d-5a2a-8421-1f6cbdf4003b	c56.9	notreported	-20718	notreported	notreported
THCA	c73	female	stageiii	nothispanicorlatino	white	THCA_unc.edu.0e830c7a-984c-4d77-be7a-78abb57f2e4e.1670227.rsem.isoforms.results	35277c30-010c-4d3f-9dfe-754bf72799d7	c73.9	1951	null	null	null	null	null	null	null	Primary Tumor	notreported	22218	alive	null	null	null	1294.0	null	null	4efe9549-5b4f-53c1-ad70-ce9eb8a629d5	c73.9	notreported	-22218	notreported	notreported
OV	c56.9	female	notreported	notreported	white	OV_unc.edu.fc1f34ba-12e1-46d8-85ef-15b9486b37c2.1518609.rsem.isoforms.results	219f54ef-4235-482d-b799-f2fa9930105c	c56.9	1944	null	null	null	null	null	null	null	Primary Tumor	notreported	18835	dead	null	3337.0	null	3337.0	null	null	7e4bfb50-f7b9-5a44-a69e-28e275a0517e	c56.9	notreported	-18835	notreported	notreported
GBM	c71.9	female	notreported	nothispanicorlatino	white	GBM_unc.edu.8fdc3c56-a96b-4cad-983a-12e6ef373069.1539875.rsem.isoforms.results	cf286533-5c8a-40f3-9c69-f46264c7893b	c71.9	1933	null	null	null	null	null	null	null	Primary Tumor	notreported	27511	dead	null	380.0	null	23.0	null	null	cfc339af-f6b7-55e0-8a5f-1d3f7d3ddd73	c71.9	notreported	-27511	notreported	notreported
LGG	c71.0	female	notreported	nothispanicorlatino	white	LGG_unc.edu.f2dba2e9-157b-494b-9650-e17d0ccc421b.2326463.rsem.isoforms.results	765588aa-075f-477f-9c18-099d018d3a1b	c71.0	1959	null	null	null	null	null	null	null	Primary Tumor	notreported	19869	alive	null	null	null	458.0	null	null	6992c246-64bf-5ddb-9273-c4371108926b	c71.0	notreported	-19869	notreported	notreported
THCA	c73	male	stagei	notreported	asian	THCA_unc.edu.4e77399b-349d-47c9-b058-f1f1fc118a34.1911783.rsem.isoforms.results	f9db9757-04d8-40bd-a58d-605f4255b0e6	c73.9	1970	null	null	null	null	null	null	null	Primary Tumor	notreported	14992	alive	null	null	null	1329.0	null	null	633fd017-b2da-5b85-84fa-e6a8c6d97b62	c73.9	notreported	-14992	notreported	notreported
BLCA	c67.2	male	stageii	nothispanicorlatino	asian	BLCA_unc.edu.1a65f0c1-c6e4-470b-8be1-1744332a1470.2507620.rsem.isoforms.results	736e8cdf-e2d7-4141-86a9-45c34178a1c8	c67.2	1961	null	54.0	null	null	0.0019362472659471476	null	167.0	Primary Tumor	notreported	19195	alive	null	null	null	361.0	null	null	3b5334a5-3156-5a17-9095-d6a798b9eccd	c67.2	notreported	-19195	notreported	notreported
BLCA	c67.9	male	stageiii	nothispanicorlatino	asian	BLCA_unc.edu.718250e5-65a4-4365-8e2e-3dd4966c4fc6.2470068.rsem.isoforms.results	96292f0e-5d09-4c44-8dfc-73ebde6bf137	c67.9	1928	null	45.0	null	null	0.001652892561983471	null	165.0	Primary Tumor	notreported	31099	dead	null	565.0	null	84.0	null	null	e9b7ef14-c4b1-5f77-b267-64d6ea51c4e2	c67.9	notreported	-31099	notreported	notreported
LGG	c71.0	female	notreported	nothispanicorlatino	white	LGG_unc.edu.106c0a27-64c4-4496-83f3-1c05df492fd2.1420630.rsem.isoforms.results	70939245-41e0-4845-a473-5fef719b9828	c71.0	1966	null	null	null	null	null	null	null	Primary Tumor	notreported	13021	dead	null	2875.0	null	null	null	null	565864af-a56b-5295-a390-a1428019ff15	c71.0	notreported	-13021	notreported	notreported
LGG	c71.9	female	notreported	nothispanicorlatino	blackorafricanamerican	LGG_unc.edu.bf5bd9e6-0623-4aac-9336-4ff9dd538c7c.1374798.rsem.isoforms.results	48607130-c09a-491d-882f-7d2591d13182	c71.9	1966	null	null	null	null	null	null	null	Primary Tumor	notreported	15986	alive	null	null	null	532.0	null	null	66d7d6e6-b406-5ce8-b499-4d2840b532cc	c71.9	notreported	-15986	notreported	notreported
BLCA	c67.0	male	stageiv	nothispanicorlatino	white	BLCA_unc.edu.535736bf-6e19-4fc6-bf3d-a2fb4739c763.2316485.rsem.isoforms.results	5c771ee8-2aea-498d-ba8c-cdbaebfd57ac	c67.0	1959	1.095890410958904	65.0	null	null	0.002006172839506173	null	180.0	Primary Tumor	notreported	19874	alive	null	null	null	376.0	null	null	a97f59bf-e567-54fa-ac35-11e11f14a069	c67.0	notreported	-19874	notreported	notreported
THCA	c73	female	stagei	hispanicorlatino	white	THCA_unc.edu.f4649515-f2fa-4ed4-ad69-d9f0a807093b.1458029.rsem.isoforms.results	24a968aa-8169-44cb-a8ac-72d7efa1fa7b	c73.9	1970	null	null	null	null	null	null	null	Primary Tumor	notreported	13542	alive	null	null	null	1989.0	null	null	b54bd200-ce30-5ea3-8c62-00bc616481ba	c73.9	notreported	-13542	notreported	notreported
THCA	c73	female	stagei	hispanicorlatino	notreported	THCA_unc.edu.2b5a5886-6a1c-4e22-b453-c0715b657249.1662370.rsem.isoforms.results	2610485e-f2b2-45f7-a578-99d6983d5f0e	c73.9	1973	null	null	null	null	null	null	null	Primary Tumor	notreported	13899	alive	null	null	null	499.0	null	null	ef461160-0879-5d5e-b6a8-8d487fd5bcb0	c73.9	notreported	-13899	notreported	notreported
THCA	c73	female	stagei	nothispanicorlatino	white	THCA_unc.edu.79e2e047-5d06-4e11-99f3-b22441bb70d1.1352662.rsem.isoforms.results	fb39f29a-5d1e-4f96-8adb-e18cc87fad2e	c73.9	1940	null	null	null	null	null	null	null	Primary Tumor	notreported	25690	alive	null	null	null	307.0	null	null	b6315ed5-076f-5848-90f7-579af5cdb184	c73.9	notreported	-25690	notreported	notreported
BLCA	c67.9	female	stageii	nothispanicorlatino	white	BLCA_unc.edu.9e1c37bb-1c94-4a98-8e44-e03953aa8ad9.2507868.rsem.isoforms.results	ce4e4549-befc-447f-9b79-ed46e302e6d7	c67.9	1935	null	66.0	null	null	0.0026106562240417706	null	159.0	Primary Tumor	notreported	28063	alive	null	null	null	665.0	null	null	47cfbec1-f690-5aed-a10d-8823759123ec	c67.9	notreported	-28063	notreported	notreported
THCA	c73	female	stageii	nothispanicorlatino	white	THCA_unc.edu.3d39fcd3-b37d-47be-8693-d9afbb6a3648.1215909.rsem.isoforms.results	4c513413-263e-4c7b-b997-7b688c47b698	c73.9	1943	null	null	null	null	null	null	null	Primary Tumor	notreported	24528	alive	null	null	null	574.0	null	null	78c28b4e-ce30-59c7-8763-15b4f822b78b	c73.9	notreported	-24528	notreported	notreported
LGG	c71.0	male	notreported	nothispanicorlatino	white	LGG_unc.edu.c66d3098-98b5-4e0a-a592-39ce259b2c86.2032928.rsem.isoforms.results	2e3b9f32-304e-454b-ac2c-fc72d2ccaa19	c71.0	1986	null	null	null	null	null	null	null	Primary Tumor	notreported	9575	alive	null	null	null	39.0	null	null	92269142-650f-58f7-a9af-4bcb44386cd3	c71.0	notreported	-9575	notreported	notreported
LGG	c71.0	male	notreported	nothispanicorlatino	white	LGG_unc.edu.b42c2efe-b9d1-49da-8aa0-3d49bb3fb02f.2350747.rsem.isoforms.results	bb4a30d5-4eba-45db-b05a-bd843044d508	c71.0	1957	null	null	null	null	null	null	null	Primary Tumor	notreported	19236	dead	null	378.0	null	null	null	null	5bb9fe97-c77f-5ebe-bfaa-e3485356190b	c71.0	notreported	-19236	notreported	notreported
LGG	c71.0	male	notreported	hispanicorlatino	white	LGG_unc.edu.cda7debf-70f9-4ea5-9018-35c560bd5ab0.1567416.rsem.isoforms.results	27d0d3cb-16c0-4ba8-9662-95917f665004	c71.0	1985	null	null	null	null	null	null	null	Primary Tumor	notreported	9614	alive	null	null	null	199.0	null	null	eed49e39-2f28-55ac-9009-5221a38b2fc5	c71.0	notreported	-9614	notreported	notreported
THCA	c73	female	stagei	notreported	notreported	THCA_unc.edu.701aefeb-87d3-4f35-96d1-57a23eaad37a.1563905.rsem.isoforms.results	fef9c64f-5959-4da0-aaa2-66b56fc7b4c3	c73.9	1992	null	null	null	null	null	null	null	Metastatic	notreported	7176	alive	null	null	null	492.0	null	null	22c3d7b4-967b-55d7-a9f3-dd13a2e352da	c73.9	notreported	-7176	notreported	notreported
LGG	c71.0	male	notreported	hispanicorlatino	white	LGG_unc.edu.3e1936a4-80e8-42a0-8af6-4db305987cb0.2330793.rsem.isoforms.results	619e18c1-09b9-468c-816d-6789c0bef0a8	c71.0	1976	null	null	null	null	null	null	null	Primary Tumor	notreported	13227	alive	null	null	null	599.0	null	null	dbcd5626-3ff1-5f1b-ba79-b3b506ec7224	c71.0	notreported	-13227	notreported	notreported
OV	c56.9	female	notreported	nothispanicorlatino	white	OV_unc.edu.056cca38-92df-42ff-b064-b0c243f8a82f.1552136.rsem.isoforms.results	ce871097-a6e9-4139-897e-642ee24ee123	c56.9	1943	null	null	null	null	null	null	null	Primary Tumor	notreported	21199	dead	null	1161.0	null	1161.0	null	null	41c9c74c-e5f7-5f95-b067-21508c7d5999	c56.9	notreported	-21199	notreported	notreported
BLCA	c67.9	male	stageii	nothispanicorlatino	white	BLCA_unc.edu.221bd562-e77d-4374-9491-efb5c3b026c3.1783477.rsem.isoforms.results	aa6142af-bad7-493c-98a0-fd070de39073	c67.9	1937	1.095890410958904	115.0	null	null	0.003629592223204141	null	178.0	Primary Tumor	notreported	27569	dead	null	261.0	null	195.0	null	null	847bb550-9dba-5d45-a608-4f666ca630e8	c67.9	notreported	-27569	notreported	notreported
THCA	c73	male	stagei	hispanicorlatino	white	THCA_unc.edu.1cc55d09-ac11-4cd5-a970-879d884ba666.1368615.rsem.isoforms.results	fb83f7d7-2182-4fb7-8e3e-8ad7f1feac72	c73.9	1965	null	null	null	null	null	null	null	Primary Tumor	notreported	14785	alive	null	null	null	1154.0	null	null	0096fd97-2735-529f-bca6-5d4e85b6befc	c73.9	notreported	-14785	notreported	notreported
THCA	c73	female	stagei	notreported	notreported	THCA_unc.edu.853de7e0-6fe3-40af-b243-e1beca83e6bd.1564018.rsem.isoforms.results	59cd0969-a798-4d19-95ed-a311f39d2f38	c73.9	1969	null	null	null	null	null	null	null	Primary Tumor	notreported	15655	alive	null	null	null	367.0	null	null	2f6b59fb-c3e7-5130-a956-39cc92cfd80d	c73.9	notreported	-15655	notreported	notreported
THCA	c73	male	stageiii	nothispanicorlatino	white	THCA_unc.edu.b8876a0e-9937-41d5-b01e-273b038031d5.1215074.rsem.isoforms.results	5dcbdfcf-8a4d-4da5-9049-f2b970fe8ca8	c73.9	1948	null	null	null	null	null	null	null	Primary Tumor	notreported	23332	alive	null	null	null	256.0	null	null	8617190d-85f3-568f-8e48-6b28b3066c55	c73.9	notreported	-23332	notreported	notreported
THCA	c73	female	stageiii	nothispanicorlatino	white	THCA_unc.edu.5199a3b8-6c4d-485f-963e-7131eb539cc6.1658484.rsem.isoforms.results	c5fd200b-ce02-4d7d-a240-78f147e483be	c73.9	1959	null	null	null	null	null	null	null	Primary Tumor	notreported	18808	alive	null	null	null	1105.0	null	null	66a51cde-7556-5ce6-a167-ac11bd78d97a	c73.9	notreported	-18808	notreported	notreported
BLCA	c67.9	male	stageiii	nothispanicorlatino	white	BLCA_unc.edu.7668e1a3-cf31-411a-8bce-aff592a0f053.1927190.rsem.isoforms.results	9c46846e-7f66-4936-af97-50a7b8189d84	c67.9	1945	3.1232876712328768	89.0	null	null	0.0026004382761139516	null	185.0	Primary Tumor	notreported	24534	dead	null	344.0	null	231.0	null	null	d45d0d4b-ea73-5905-a254-18d78e4f2f0d	c67.9	notreported	-24534	notreported	notreported
BLCA	c67.9	male	stageiv	notreported	white	BLCA_unc.edu.6491f391-9704-4249-bc81-d712e755ec74.1110579.rsem.isoforms.results	88a521ce-a5e9-4c6f-83d4-ec36a62fedb6	c67.9	1933	null	80.7	null	null	0.0026052427685950416	null	176.0	Primary Tumor	notreported	25317	alive	null	null	null	3420.0	null	null	1e4de3a3-e8f1-50fc-80bb-c288fabdb826	c67.9	notreported	-25317	notreported	notreported
BLCA	c67.9	male	stageiv	nothispanicorlatino	white	BLCA_unc.edu.b290727b-23ed-4e73-9071-cf2c06671430.1469022.rsem.isoforms.results	932bcdd4-5145-49e8-9a95-8a546396f572	c67.9	1934	null	null	null	null	null	null	null	Primary Tumor	notreported	28030	dead	null	142.0	null	null	null	null	450bc236-a1d5-59b2-a632-0119ed9102bc	c67.9	notreported	-28030	notreported	notreported
BLCA	c67.9	male	stageiii	nothispanicorlatino	asian	BLCA_unc.edu.4e0401b2-6ad4-4709-aa43-f2af0afef259.2095127.rsem.isoforms.results	29c52372-d3a7-4188-b468-67c3451c4f20	c67.9	1957	1.36986301369863	55.0	null	null	0.0021484375	null	160.0	Primary Tumor	notreported	20169	alive	null	null	null	798.0	null	null	da7de5b6-726b-5429-a97f-25f3e712d4c0	c67.9	notreported	-20169	notreported	notreported
LGG	c71.0	male	notreported	nothispanicorlatino	white	LGG_unc.edu.bf011a58-857d-4191-ab61-56e2a0b9e181.2331314.rsem.isoforms.results	621424ec-67bc-4c42-b0ad-64c5654b5ad9	c71.0	1978	null	null	null	null	null	null	null	Primary Tumor	notreported	12417	alive	null	null	null	992.0	null	null	08d72d98-8a15-5ddc-a171-027da577a011	c71.0	notreported	-12417	notreported	notreported
OV	c56.9	female	notreported	nothispanicorlatino	white	OV_unc.edu.519aea8b-5e08-47b2-bb98-b311f2dba540.1548945.rsem.isoforms.results	87cdf9a8-0579-4d3e-b4df-0f8eef63d7f4	c56.9	1942	null	null	null	null	null	null	null	Primary Tumor	notreported	21972	dead	null	1321.0	null	1321.0	null	null	cb076281-fc07-59e0-98e5-006fcdb7e319	c56.9	notreported	-21972	notreported	notreported
LGG	c71.9	female	notreported	nothispanicorlatino	white	LGG_unc.edu.149fe971-260e-4cbf-a5aa-41eca339847a.1413134.rsem.isoforms.results	400b2fa3-baf7-4baa-99b4-88b9f25b5049	c71.9	1955	null	null	null	null	null	null	null	Primary Tumor	notreported	15372	dead	null	2379.0	null	2379.0	null	null	3b17ea3c-1305-5393-bb25-0eaaa148c6e7	c71.9	notreported	-15372	notreported	notreported
LGG	c71.0	male	notreported	nothispanicorlatino	white	LGG_unc.edu.8d64e025-7822-4888-bd98-dd39ab8c73f1.1650203.rsem.isoforms.results	1159c88c-39d0-4c03-9c66-36af5340a67a	c71.0	1989	null	null	null	null	null	null	null	Primary Tumor	notreported	8642	alive	null	null	null	862.0	null	null	04119efd-0572-5778-bb54-4f1b0be32d39	c71.0	notreported	-8642	notreported	notreported
THCA	c73	female	stageiva	nothispanicorlatino	asian	THCA_unc.edu.c068f36c-8de2-4986-b296-c13c2ac613f4.1358906.rsem.isoforms.results	b597023c-ff84-44cc-bfcc-8bee64ca4cff	c73.9	1958	null	null	null	null	null	null	null	Primary Tumor	notreported	19601	alive	null	null	null	1070.0	null	null	fe3fc913-48a3-5564-88ee-86123e941bb3	c73.9	notreported	-19601	notreported	notreported
THCA	c73	male	stagei	notreported	white	THCA_unc.edu.42250872-9cae-4d81-97ef-1a21ec1f977a.1651149.rsem.isoforms.results	a09b20b5-c187-4632-b996-0d5314a9885c	c73.9	1973	null	null	null	null	null	null	null	Primary Tumor	notreported	14470	alive	null	null	null	175.0	null	null	b1946f4d-829a-5927-a79c-786855d92320	c73.9	notreported	-14470	notreported	notreported
OV	c56.9	female	notreported	nothispanicorlatino	white	OV_unc.edu.3e4f0ca7-8428-47df-80a3-3bc9153aedfa.1566379.rsem.isoforms.results	808eb134-9c7d-43bb-b86c-2f3259193954	c56.9	1935	null	null	null	null	null	null	null	Primary Tumor	notreported	26060	dead	null	565.0	null	565.0	null	null	c76423fa-47c5-5e83-9344-ce0ca6c75063	c56.9	notreported	-26060	notreported	notreported
THCA	c73	female	stagei	hispanicorlatino	white	THCA_unc.edu.87ad5350-308a-4f86-a205-f4e566f950e2.1901936.rsem.isoforms.results	29afb71c-c2ca-499e-b1c7-12758c9b03d6	c73.9	1977	null	null	null	null	null	null	null	Primary Tumor	notreported	12368	alive	null	null	null	1623.0	null	null	dce8d02e-55d8-5ea8-b3cf-3c5e15549136	c73.9	notreported	-12368	notreported	notreported
OV	c56.9	female	notreported	notreported	white	OV_unc.edu.a658045c-93a6-4aac-abbb-1cd6093b7735.1524624.rsem.isoforms.results	65435f50-a35d-49e3-a36e-b95d9e274ca0	c56.9	1930	null	null	null	null	null	null	null	Primary Tumor	notreported	24471	dead	null	2688.0	null	2688.0	null	null	d92abbe4-d3f0-57cb-84bb-a07a6746bd3f	c56.9	notreported	-24471	notreported	notreported
BLCA	c67.9	female	stageii	nothispanicorlatino	white	BLCA_unc.edu.500beee6-a0cf-44aa-9102-de22b7210aba.2477412.rsem.isoforms.results	b8f3d552-2d4b-4dd8-b0e8-6a38e1baa2f3	c67.9	null	0.821917808219178	null	null	null	null	null	null	Primary Tumor	notreported	28719	alive	null	null	null	2380.0	null	null	bbc672c5-ce0a-54bb-96e4-28645c9154c3	c67.9	notreported	-28719	notreported	notreported
BLCA	c67.4	male	stageii	nothispanicorlatino	white	BLCA_unc.edu.94b917da-6579-4d30-b81b-eba739bbae5c.2498677.rsem.isoforms.results	eb4f8c76-08d9-4ba4-846e-969fded63a87	c67.4	1952	null	81.0	null	null	0.0027379664683612765	null	172.0	Primary Tumor	notreported	22365	alive	null	null	null	618.0	null	null	dd7c43cb-31a4-51a4-beec-c663cf4d7781	c67.4	notreported	-22365	notreported	notreported
BLCA	c67.1	male	stageii	nothispanicorlatino	white	BLCA_unc.edu.55f7869a-9583-4696-a281-b3c4ef4bd426.1474546.rsem.isoforms.results	7840aea9-40c4-473e-be33-8fa0b9f332c9	c67.1	1940	1.643835616438356	86.0	null	null	0.0028081632653061224	null	175.0	Solid Tissue Normal	notreported	25609	dead	null	651.0	null	88.0	null	null	1c09a7b9-0a93-5a3f-84e9-8010c0e86378	c67.1	notreported	-25609	notreported	notreported
BLCA	c67.0	male	stageii	nothispanicorlatino	white	BLCA_unc.edu.dc901511-9e0f-4fc6-b6f4-bee8e627ce25.1469001.rsem.isoforms.results	33bc6a7c-9844-41e3-96b3-1e34bb3fedd5	c67.0	1944	0.547945205479452	91.0	null	null	0.0026878544423440454	null	184.0	Primary Tumor	notreported	24681	dead	null	258.0	null	237.0	null	null	f5a51efc-7307-533f-8372-f73877dc03b4	c67.0	notreported	-24681	notreported	notreported
LGG	c71.0	male	notreported	nothispanicorlatino	white	LGG_unc.edu.9b6fc8d2-b1a5-4b8e-81d3-18258860b4b5.2443156.rsem.isoforms.results	4fb16aee-df08-441a-846b-558e0efe8342	c71.0	1947	null	null	null	null	null	null	null	Primary Tumor	notreported	24411	dead	null	245.0	null	null	null	null	a4578bd7-d26b-5b24-9f21-072aea3036af	c71.0	notreported	-24411	notreported	notreported
THCA	c73	female	stagei	nothispanicorlatino	white	THCA_unc.edu.a73f836e-fa7b-4e38-8075-adb2dc4322fb.1457934.rsem.isoforms.results	5be6c0d9-6ad7-482f-bd00-0432702df495	c73.9	1972	null	null	null	null	null	null	null	Primary Tumor	notreported	12645	alive	null	null	null	2019.0	null	null	ddc65da8-9c39-5188-b8b2-4ccf852b0d8b	c73.9	notreported	-12645	notreported	notreported
BLCA	c67.9	male	stageii	nothispanicorlatino	asian	BLCA_unc.edu.0aba0f10-05b2-4045-822b-045f61457427.2095978.rsem.isoforms.results	d492383f-5449-4845-bfb3-b2cb4eb49c4e	c67.9	1931	null	41.0	null	null	0.0017065556711758584	null	155.0	Primary Tumor	notreported	29613	alive	null	null	null	820.0	null	null	e2cca96c-de92-580c-8666-dd36f4554481	c67.9	notreported	-29613	notreported	notreported
OV	c56.9	female	notreported	nothispanicorlatino	white	OV_unc.edu.9a54d0fe-f998-4866-bb1f-92be472d843a.1527438.rsem.isoforms.results	4d71dd15-cd01-4dae-ad70-6dc325140207	c56.9	1961	null	null	null	null	null	null	null	Primary Tumor	notreported	16889	alive	null	null	null	268.0	null	null	d9297888-91e7-5eb6-9a85-03216ab39514	c56.9	notreported	-16889	notreported	notreported
OV	c56.9	female	notreported	notreported	notreported	OV_unc.edu.e05f2e2a-77d2-4f86-8e21-27cdd93b88b0.1518509.rsem.isoforms.results	e978a457-92ff-4eab-b759-ec6e74d973e8	c56.9	1951	null	null	null	null	null	null	null	Primary Tumor	notreported	null	dead	null	679.0	null	null	null	null	ad6e91d2-df71-5fea-b6c5-59d3ea208c19	c56.9	notreported	null	notreported	notreported
LGG	c71.0	female	notreported	nothispanicorlatino	white	LGG_unc.edu.a57d41bc-71b6-4215-804a-d66071f60594.2409114.rsem.isoforms.results	36615695-921c-4c8a-93d6-6c788079beae	c71.0	1973	null	null	null	null	null	null	null	Primary Tumor	notreported	14617	alive	null	null	null	596.0	null	null	cbf0dbb0-8f9c-549d-b766-23bf00479cc7	c71.0	notreported	-14617	notreported	notreported
BLCA	c67.9	male	stageii	notreported	notreported	BLCA_unc.edu.958520af-f270-49ab-8fb6-57e1ae8ae68f.1179808.rsem.isoforms.results	40398c03-a9cc-476b-9ee9-aecf161be43f	c67.9	1947	3.3424657534246576	80.0	null	null	0.00238884409806205	null	183.0	Primary Tumor	notreported	22068	alive	null	null	null	59.0	null	null	ee345c92-373e-56f0-a9b8-f9b88fbb9e2e	c67.9	notreported	-22068	notreported	notreported
THCA	c73	female	stagei	nothispanicorlatino	white	THCA_unc.edu.93c42359-3615-406b-ad18-8b3f23d8eab5.1458071.rsem.isoforms.results	efbdedaa-4b02-40ac-b93c-9670c018cf7f	c73.9	1973	null	null	null	null	null	null	null	Primary Tumor	notreported	12714	alive	null	null	null	1922.0	null	null	6bf5d1c9-11bc-54a3-8397-52a283f6e64b	c73.9	notreported	-12714	notreported	notreported
THCA	c73	female	stageii	nothispanicorlatino	asian	THCA_unc.edu.83d04848-bb60-4f0b-8ab4-bad21d237ded.1654249.rsem.isoforms.results	6592a7db-cbc7-4afd-9fdb-5cc16c16eeca	c73.9	1953	null	null	null	null	null	null	null	Primary Tumor	notreported	20997	alive	null	null	null	931.0	null	null	1617d20e-05fd-5b33-8587-441265d852ae	c73.9	notreported	-20997	notreported	notreported
LGG	c71.9	male	notreported	nothispanicorlatino	white	LGG_unc.edu.f48c7bd0-048b-411e-a99c-4a6af9df51e4.1411925.rsem.isoforms.results	fc222f23-b3b2-4ac0-bc61-e8e8fa5cc160	c71.9	1938	null	null	null	null	null	null	null	Primary Tumor	notreported	24578	dead	null	234.0	null	null	null	null	e5f68720-2b76-5108-ac2c-d449431bf64c	c71.9	notreported	-24578	notreported	notreported
THCA	c73	female	stagei	nothispanicorlatino	blackorafricanamerican	THCA_unc.edu.e46fd0f4-896f-4a4f-ac4d-b03303e464cb.1216062.rsem.isoforms.results	c30eb9bd-d705-4464-9014-e0aa7cda53c7	c73.9	1974	null	null	null	null	null	null	null	Primary Tumor	notreported	12924	alive	null	null	null	1986.0	null	null	f4c13f69-b804-59e1-9a51-ec50a11cc997	c73.9	notreported	-12924	notreported	notreported
THCA	c73	male	stagei	nothispanicorlatino	asian	THCA_unc.edu.c8f72b88-2a45-47c3-ad3b-b49ec4366345.1816597.rsem.isoforms.results	9b1dbd0d-be6d-4a88-881a-faf57ceba81c	c73.9	1980	null	null	null	null	null	null	null	Primary Tumor	notreported	11997	alive	null	null	null	385.0	null	null	56e86487-1502-5f16-b6f6-aac4dd5c7108	c73.9	notreported	-11997	notreported	notreported
LGG	c71.0	male	notreported	nothispanicorlatino	white	LGG_unc.edu.8028a19b-10cf-4eb9-84ec-d61558b9976b.1671944.rsem.isoforms.results	40ae8507-c08a-45d5-9bbb-65d236c82319	c71.0	1952	null	null	null	null	null	null	null	Primary Tumor	notreported	20613	alive	null	null	null	10.0	null	null	d9e398f6-3522-519e-b625-1534d5adab79	c71.0	notreported	-20613	notreported	notreported
GBM	c71.9	male	notreported	notreported	white	GBM_unc.edu.1dd740dc-2752-4511-ac12-45766c8e2737.1544751.rsem.isoforms.results	d88b35a3-a291-457a-b15b-a314859b25c5	c71.9	1950	null	null	null	null	null	null	null	Primary Tumor	notreported	21838	notreported	null	null	null	95.0	null	null	03603c65-d92c-5d36-bcd2-7e58bf7b43a4	c71.9	notreported	-21838	notreported	notreported
OV	c56.9	female	notreported	nothispanicorlatino	white	OV_unc.edu.41a5fa6b-4594-4ef8-b841-fe75c17a13c2.1555058.rsem.isoforms.results	502e8d02-2953-4514-a2e1-6179dd94da73	c56.9	1931	null	null	null	null	null	null	null	Primary Tumor	notreported	28445	dead	null	1993.0	null	145.0	null	null	3b1937d2-acf2-5a70-ac4c-0df7f5e295f7	c56.9	notreported	-28445	notreported	notreported
THCA	c73	female	stagei	nothispanicorlatino	white	THCA_unc.edu.631e7034-363e-4334-b448-217fb137009e.1655729.rsem.isoforms.results	744df1f5-a7d5-4675-92ce-6e4713f0d541	c73.9	1961	null	null	null	null	null	null	null	Primary Tumor	notreported	18722	alive	null	null	null	684.0	null	null	df2dd735-bf80-550b-8ac8-38ebc856cd1d	c73.9	notreported	-18722	notreported	notreported
LGG	c71.0	male	notreported	nothispanicorlatino	white	LGG_unc.edu.9ebc9830-2f01-4528-bd95-ae8dfcb2c0a6.1816132.rsem.isoforms.results	6957d45e-7ccb-457d-800d-c2a2037f4f01	c71.0	1973	null	null	null	null	null	null	null	Primary Tumor	notreported	14201	dead	null	1262.0	null	253.0	null	null	2af82362-5c44-5e92-9efd-c758b4eef835	c71.0	notreported	-14201	notreported	notreported
THCA	c73	male	stagei	nothispanicorlatino	white	THCA_unc.edu.0cb1e91c-9b3b-4b5b-ba85-2c0e43ca4595.1365875.rsem.isoforms.results	46239f1e-bd85-4d7a-a313-762666599a6d	c73.9	1980	null	null	null	null	null	null	null	Primary Tumor	notreported	10510	alive	null	null	null	2367.0	null	null	42858711-9934-5c04-b8ba-eef5021bf47c	c73.9	notreported	-10510	notreported	notreported
LGG	c71.0	female	notreported	nothispanicorlatino	white	LGG_unc.edu.08a9d6fb-2367-4bd2-b828-c1d970dc62a8.2055997.rsem.isoforms.results	a4e2e507-7ddf-43df-b959-fe451971af1e	c71.0	1976	null	null	null	null	null	null	null	Primary Tumor	notreported	13595	alive	null	null	null	512.0	null	null	e3f0a4f5-bca0-546e-b817-58ad8a67f040	c71.0	notreported	-13595	notreported	notreported
BLCA	c67.9	female	stageiv	nothispanicorlatino	white	BLCA_unc.edu.2dd4a5e0-3008-4615-bcc5-9cc8d9a708b2.2646877.rsem.isoforms.results	5f7c3b2d-9a5b-470f-bd12-9c7787a543f0	c67.9	1939	2.8493150684931505	50.0	null	null	0.001953125	null	160.0	Primary Tumor	notreported	25532	alive	null	null	null	68.0	null	null	b262fd90-f42d-5516-aab8-2335100052cb	c67.9	notreported	-25532	notreported	notreported
THCA	c73	male	stagei	nothispanicorlatino	asian	THCA_unc.edu.640a5950-2e39-4c64-808c-b40f71decc62.1986339.rsem.isoforms.results	bcd63672-8a22-4a30-9045-a43def5b4d6f	c73.9	1967	null	null	null	null	null	null	null	Primary Tumor	notreported	14245	alive	null	null	null	2997.0	null	null	46c0eac4-60bf-5dba-8c94-563c457dc46b	c73.9	notreported	-14245	notreported	notreported
THCA	c73	female	stagei	notreported	notreported	THCA_unc.edu.2491134e-0745-4877-bde0-ce919c4ce3f4.1903252.rsem.isoforms.results	511b5f28-709b-4e43-9efd-b2f425bba962	c73.9	1970	null	null	null	null	null	null	null	Primary Tumor	notreported	15534	alive	null	null	null	683.0	null	null	2098666c-954f-5156-9b19-1799d92f428c	c73.9	notreported	-15534	notreported	notreported
LGG	c71.0	male	notreported	nothispanicorlatino	white	LGG_unc.edu.13d82ac1-eecc-41bb-af05-4fd4f614f260.2408621.rsem.isoforms.results	10887e42-444d-49fc-aee5-dd0e9fc4ea54	c71.0	1967	null	null	null	null	null	null	null	Primary Tumor	notreported	16163	alive	null	null	null	1127.0	null	null	b26dbd7f-34dd-5721-9a2c-ec97f627af91	c71.0	notreported	-16163	notreported	notreported
LGG	c71.0	male	notreported	nothispanicorlatino	white	LGG_unc.edu.450ee18e-9d9b-4873-a882-8b8f123d104c.2325555.rsem.isoforms.results	3e4851ca-4d69-4035-a2dd-8ed6e70f1ffb	c71.0	1950	null	null	null	null	null	null	null	Primary Tumor	notreported	21231	alive	null	null	null	2289.0	null	null	c5dd27db-04bc-5f62-afbc-a24d8ed0a528	c71.0	notreported	-21231	notreported	notreported
OV	c56.9	female	notreported	notreported	white	OV_unc.edu.d855f86a-f302-47fb-aa9f-5977632c695a.1519354.rsem.isoforms.results	eb7c3b35-7a5e-4621-b31f-9775c51f9a23	c56.9	1941	null	null	null	null	null	null	null	Primary Tumor	notreported	22876	alive	null	null	null	1993.0	null	null	00f8ee1c-618f-530e-8d64-954aff8478aa	c56.9	notreported	-22876	notreported	notreported
GBM	c71.9	female	notreported	nothispanicorlatino	white	GBM_unc.edu.2e5a4130-bc62-4986-948b-b741b3fbdc7a.1544075.rsem.isoforms.results	8da3103e-3e6c-4176-a583-d5fe5e60601e	c71.9	1938	null	null	null	null	null	null	null	Recurrent Tumor	notreported	23343	dead	null	1448.0	null	1439.0	null	null	5addfbc5-fd14-540b-969d-ee43f908be55	c71.9	notreported	-23343	notreported	notreported
THCA	c73	female	stageiii	nothispanicorlatino	white	THCA_unc.edu.2a276a7e-a3e3-48df-b427-f32f70606152.1267262.rsem.isoforms.results	e23cd75a-06ad-4da0-b19b-b812b0f6c1b9	c73.9	1952	null	null	null	null	null	null	null	Primary Tumor	notreported	20816	alive	null	null	null	2492.0	null	null	525f6c40-70e6-5c9f-9ab3-f8a533495b2b	c73.9	notreported	-20816	notreported	notreported
OV	c56.9	female	notreported	nothispanicorlatino	white	OV_unc.edu.c5a82b6e-048d-4377-9b6c-4417ba1876fe.1520105.rsem.isoforms.results	263e85e2-7b6f-453f-8fd0-e5ea1409fece	c56.9	1929	null	null	null	null	null	null	null	Primary Tumor	notreported	27006	dead	null	1162.0	null	239.0	null	null	3c66f500-b2a5-5482-af5d-a85b32db3b8f	c56.9	notreported	-27006	notreported	notreported
GBM	c71.9	male	notreported	nothispanicorlatino	white	GBM_unc.edu.4e8e7e01-95a7-4724-bbc5-91436d80d0f7.1542715.rsem.isoforms.results	149be735-d5db-43b6-80b7-d40e3a84500b	c71.9	1937	null	null	null	null	null	null	null	Primary Tumor	notreported	25318	dead	null	828.0	null	801.0	null	null	c83cf0e3-c127-5eed-9a6f-7335b7134e40	c71.9	notreported	-25318	notreported	notreported
LGG	c71.0	male	notreported	nothispanicorlatino	white	LGG_unc.edu.3cd458e4-4e4a-4360-b667-5953c1425f75.1642954.rsem.isoforms.results	010aac75-3bfe-4bf2-b866-af0f2d92f125	c71.0	1990	null	null	null	null	null	null	null	Primary Tumor	notreported	6480	alive	null	null	null	2772.0	null	null	e9d2384d-da1e-5ad1-98e9-ae37d5d836fc	c71.0	notreported	-6480	notreported	notreported
BLCA	c67.9	male	stageiv	nothispanicorlatino	white	BLCA_unc.edu.59551fc3-7885-44d9-bf8a-ffdd5bea8238.2512876.rsem.isoforms.results	5a0e4dc3-4ec6-4d27-bb7e-1d2221d06d33	c67.9	null	null	null	null	null	null	null	null	Primary Tumor	notreported	32872	dead	null	92.0	null	null	null	null	8027757c-3049-5f69-a419-b4a743bc02d7	c67.9	notreported	-32872	notreported	notreported
BLCA	c67.9	female	stageiii	notreported	notreported	BLCA_unc.edu.b1984010-7ef5-4df4-abfc-d18502cf124c.1178760.rsem.isoforms.results	4ff9b4f2-6d04-4fed-8796-155902a8bf28	c67.9	1926	1.917808219178082	68.0	null	null	0.002352941176470588	null	170.0	Primary Tumor	notreported	29951	alive	null	null	null	700.0	null	null	dc44cdad-53f8-5419-baca-4e7ec09feaa7	c67.9	notreported	-29951	notreported	notreported
THCA	c73	female	stagei	nothispanicorlatino	asian	THCA_unc.edu.46fef818-e07a-46b4-9cd4-de48ab9497ec.1816917.rsem.isoforms.results	2c9e8686-9757-4e05-8d0e-efeaa3045d66	c73.9	1970	null	null	null	null	null	null	null	Primary Tumor	notreported	15268	alive	null	null	null	346.0	null	null	e1a0bec0-c711-536c-a866-22d0a1ddb6ee	c73.9	notreported	-15268	notreported	notreported
BLCA	c67.9	female	stageiii	nothispanicorlatino	notreported	BLCA_unc.edu.4f40609b-40ad-44f2-9185-a4c99056c48e.2634486.rsem.isoforms.results	5378f375-aa04-4eca-bc35-190b3efb52bc	c67.9	1931	2.5753424657534247	92.0	null	null	0.003259637188208617	null	168.0	Primary Tumor	notreported	27687	dead	null	941.0	null	null	null	null	1a108cfa-d5ea-57d1-88da-eae8fd94a20e	c67.9	notreported	-27687	notreported	notreported
THCA	c73	female	stagei	nothispanicorlatino	asian	THCA_unc.edu.63136b4d-1b36-4c2a-9a63-2eeaeb830ced.1656019.rsem.isoforms.results	93691bae-f1bd-437e-ae72-b50736d1e29a	c73.9	1974	null	null	null	null	null	null	null	Primary Tumor	notreported	14019	alive	null	null	null	938.0	null	null	4422279b-e8df-58cd-8b82-0e9e01e0209f	c73.9	notreported	-14019	notreported	notreported
THCA	c73	female	stagei	nothispanicorlatino	asian	THCA_unc.edu.b544247b-a6dd-4a10-b9dc-a9437ccbded2.1817001.rsem.isoforms.results	2d633ced-ae85-462c-90e7-c1b109e084cf	c73.9	1989	null	null	null	null	null	null	null	Primary Tumor	notreported	8523	alive	null	null	null	917.0	null	null	06dbd4b5-7155-54ad-aeba-ed58439095e8	c73.9	notreported	-8523	notreported	notreported
OV	c56.9	female	notreported	nothispanicorlatino	white	OV_unc.edu.c6e1c591-3225-482a-8350-112b664a37e6.1564800.rsem.isoforms.results	b31d85cc-d2e2-4bd1-9986-d6bbe30e657f	c56.9	1940	null	null	null	null	null	null	null	Primary Tumor	notreported	23273	alive	null	null	null	2182.0	null	null	38e754fd-a254-5193-9f78-49239781ea56	c56.9	notreported	-23273	notreported	notreported
THCA	c73	male	stagei	notreported	notreported	THCA_unc.edu.6044cdaf-212b-477f-a967-fc44911ab337.1456227.rsem.isoforms.results	707312fe-1d92-413e-a891-1ea3f496c343	c73.9	1970	null	null	null	null	null	null	null	Primary Tumor	notreported	15313	alive	null	null	null	1133.0	null	null	9cf4142b-73fc-56a9-94d4-1bcc1cdd45c0	c73.9	notreported	-15313	notreported	notreported
GBM	c71.9	male	notreported	hispanicorlatino	white	GBM_unc.edu.3053a2c5-4426-4d56-85b0-50567f1e81c9.1544427.rsem.isoforms.results	a262928c-e20a-4c02-8114-1227e05c43e1	c71.9	1973	null	null	null	null	null	null	null	Primary Tumor	notreported	13257	alive	null	null	null	214.0	null	null	cdaceb60-cc09-5f83-9ff1-2ab04178ca82	c71.9	notreported	-13257	notreported	notreported
GBM	c71.9	female	notreported	nothispanicorlatino	white	GBM_unc.edu.07775763-1931-4f95-ad0a-094a228a3770.1545183.rsem.isoforms.results	9348e446-0e43-4210-b07e-c534980cbf62	c71.9	1928	null	null	null	null	null	null	null	Primary Tumor	notreported	29802	dead	null	414.0	null	414.0	null	null	4aefc1a9-9938-5772-b77e-b0eb8d8760d9	c71.9	notreported	-29802	notreported	notreported
OV	c56.9	female	notreported	notreported	white	OV_unc.edu.f1579d6e-6efd-47b5-b2b4-a97e1480ce0a.1517878.rsem.isoforms.results	6f25001a-f890-4fd0-a994-e62a9ea5c6f3	c56.9	1944	null	null	null	null	null	null	null	Primary Tumor	notreported	21940	alive	null	null	null	1900.0	null	null	da1f114e-7c5a-51fc-9d84-66d67b4f7676	c56.9	notreported	-21940	notreported	notreported
BLCA	c67.9	female	stageii	nothispanicorlatino	white	BLCA_unc.edu.a5a9f82f-f3f4-47dc-9dcd-6b65c1c73a37.2512552.rsem.isoforms.results	ab77b411-4df2-4e3a-bfad-946e8bb1fa70	c67.9	1959	1.5890410958904109	110.0	null	null	0.00463821892393321	null	154.0	Primary Tumor	notreported	19384	dead	null	949.0	null	734.0	null	null	691c99e8-bc7a-5891-8b8b-8ca143efae08	c67.9	notreported	-19384	notreported	notreported
BLCA	c67.2	male	stageii	nothispanicorlatino	white	BLCA_unc.edu.fbca79e2-8904-4bdf-aede-b2049cb81302.2647480.rsem.isoforms.results	329d372c-c44e-4595-b8ac-474c5a1321a5	c67.2	1932	null	129.0	null	null	0.0038944571911604877	null	182.0	Primary Tumor	notreported	27422	dead	null	232.0	null	null	null	null	7b9df887-b0e4-5c98-8594-41e76f6bce4d	c67.2	notreported	-27422	notreported	notreported
GBM	c71.9	male	notreported	nothispanicorlatino	white	GBM_unc.edu.66f6da01-b85b-4e29-8059-0bb6a32d709f.1541582.rsem.isoforms.results	9ad6c241-ccc5-4532-a6ac-098271b13b5f	c71.9	1958	null	null	null	null	null	null	null	Primary Tumor	notreported	18125	dead	null	771.0	null	570.0	null	null	6d74ecf4-7ce5-566f-8389-d24e1617ba27	c71.9	notreported	-18125	notreported	notreported
LGG	c71.0	female	notreported	nothispanicorlatino	blackorafricanamerican	LGG_unc.edu.61051f5f-b74b-4b31-ae20-b91491f571d6.1677293.rsem.isoforms.results	c50c984f-316a-4f24-968d-618691c54c3d	c71.0	1927	null	null	null	null	null	null	null	Primary Tumor	notreported	27039	dead	null	199.0	null	null	null	null	9d59fe83-546b-5234-a660-e4ea35d23a2f	c71.0	notreported	-27039	notreported	notreported
LGG	c71.9	female	notreported	nothispanicorlatino	white	LGG_unc.edu.7ee7ec4c-236b-4d28-94ee-a9e284f03afd.2061569.rsem.isoforms.results	92ebe72e-508d-4547-b14b-b8e02e6233ca	c71.9	1981	null	null	null	null	null	null	null	Primary Tumor	notreported	11861	alive	null	null	null	77.0	null	null	e780c8cc-6f24-54bb-8192-e71332186f83	c71.9	notreported	-11861	notreported	notreported
THCA	c73	female	stagei	nothispanicorlatino	white	THCA_unc.edu.dbfb44e2-a785-4e49-a02b-fbe06573689d.1662379.rsem.isoforms.results	fd036ec5-3ffb-40b1-8002-943be0e2532e	c73.9	1942	null	null	null	null	null	null	null	Primary Tumor	notreported	25565	alive	null	null	null	1107.0	null	null	376db00b-9200-5061-9b54-36759a56d0b4	c73.9	notreported	-25565	notreported	notreported
OV	c56.9	female	notreported	nothispanicorlatino	white	OV_unc.edu.423f3c95-8bf5-4c2c-8b7a-343d9af1d0bf.1555255.rsem.isoforms.results	78777a80-cc6c-46c9-a14a-837ac7943719	c56.9	1934	null	null	null	null	null	null	null	Primary Tumor	notreported	24199	dead	null	61.0	null	null	null	null	34c73698-1092-5f12-b670-e84b1ca08e3a	c56.9	notreported	-24199	notreported	notreported
LGG	c71.0	male	notreported	nothispanicorlatino	white	LGG_unc.edu.f6a8512b-7649-4ca0-aa55-5bf468e8931e.1567356.rsem.isoforms.results	72aa812d-5daa-4bd7-9028-ec541b1f25bd	c71.0	1959	null	null	null	null	null	null	null	Primary Tumor	notreported	19149	alive	null	null	null	114.0	null	null	cb15fe31-75b0-5515-8e61-b1efd44309e0	c71.0	notreported	-19149	notreported	notreported
THCA	c73	male	stagei	nothispanicorlatino	white	THCA_unc.edu.63f7a81e-c404-49fc-bc72-52b2a81ea9a5.1366724.rsem.isoforms.results	4fa53eb7-1fdb-4fe5-b5ad-f3d8069b3eb8	c73.9	1971	null	null	null	null	null	null	null	Primary Tumor	notreported	14408	alive	null	null	null	1133.0	null	null	315f0a85-7779-556c-8410-f9efb06f03a9	c73.9	notreported	-14408	notreported	notreported
BLCA	c67.0	male	stageiv	nothispanicorlatino	white	BLCA_unc.edu.da9b7c51-c544-4ead-93c9-39b334b6bef2.1178704.rsem.isoforms.results	419deaac-ea45-4bdd-9fa0-b5cd8429b44f	c67.0	1933	null	null	null	null	null	null	null	Solid Tissue Normal	notreported	26778	dead	null	593.0	null	null	null	null	c8bf1857-b842-5c8f-99be-fddbb29a127c	c67.0	notreported	-26778	notreported	notreported
OV	c56.9	female	notreported	notreported	blackorafricanamerican	OV_unc.edu.af63aa43-ab5f-44c5-85cf-01d84be261a3.1525084.rsem.isoforms.results	242da7d0-8c6a-4395-9a0d-aa36e7c25ce6	c56.9	1961	null	null	null	null	null	null	null	Primary Tumor	notreported	16021	alive	null	null	null	2032.0	null	null	d1f6b014-7b53-518b-a401-c80c673bf79b	c56.9	notreported	-16021	notreported	notreported
BLCA	c67.3	female	stageii	nothispanicorlatino	white	BLCA_unc.edu.4ecec21e-cbd5-42ec-af2e-bf58f2710458.2500048.rsem.isoforms.results	d37b0460-efa4-4cf5-8082-f27ff2cf2f28	c67.3	1949	2.191780821917808	85.0	null	null	0.003279194475521778	null	161.0	Primary Tumor	notreported	23542	alive	null	null	null	366.0	null	null	2fd1a497-437f-5180-820b-6c39f1ee009b	c67.3	notreported	-23542	notreported	notreported
THCA	c73	male	stageiva	notreported	notreported	THCA_unc.edu.df2975ac-92dc-4a93-8f9c-965e6d4e2cf3.1656949.rsem.isoforms.results	04dc8ee3-ec93-4b56-a546-f96746f8122f	c73.9	1948	null	null	null	null	null	null	null	Primary Tumor	notreported	21987	alive	null	null	null	1096.0	null	null	15099a39-e0af-520d-8c4b-4f093d6f70e0	c73.9	notreported	-21987	notreported	notreported
THCA	c73	male	stagei	nothispanicorlatino	asian	THCA_unc.edu.39a9dd5b-3cd1-4673-b147-4b789fc04993.1456441.rsem.isoforms.results	16505d78-90d9-47d0-9b86-c6ef91d23aac	c73.9	1980	null	null	null	null	null	null	null	Primary Tumor	notreported	11399	alive	null	null	null	389.0	null	null	0fc00bd3-860b-5bc2-b4d6-295ccfa6eadf	c73.9	notreported	-11399	notreported	notreported
BLCA	c67.4	female	stageiii	nothispanicorlatino	white	BLCA_unc.edu.a36865ec-a5fa-4277-a887-325373acadb1.1928582.rsem.isoforms.results	77236911-d9e0-4b85-829a-a98f1e4b92d2	c67.4	1941	8.219178082191782	61.0	null	null	0.002474745425777922	null	157.0	Primary Tumor	notreported	25993	alive	null	null	null	455.0	null	null	3d333a17-123c-531a-9683-3130e277e67e	c67.4	notreported	-25993	notreported	notreported
BLCA	c67.9	male	stageii	nothispanicorlatino	asian	BLCA_unc.edu.791bcd93-c949-49b3-aaa4-4c8af82f5ec1.2246317.rsem.isoforms.results	faf3c230-c661-4d6e-9b73-2b679bc6deff	c67.9	1976	0.136986301369863	64.0	null	null	0.0022675736961451248	null	168.0	Primary Tumor	notreported	13867	alive	null	null	null	750.0	null	null	5f81b417-8618-547e-81f4-8b2abef8f93f	c67.9	notreported	-13867	notreported	notreported
THCA	c73	female	stageiii	notreported	white	THCA_unc.edu.231c36ea-41b0-4a29-bb3f-222a266c2a19.1889590.rsem.isoforms.results	fd3315da-c870-4ad0-9d2a-50b1647d3e46	c73.9	1953	null	null	null	null	null	null	null	Metastatic	notreported	21587	alive	null	null	null	79.0	null	null	df847be9-6067-5be7-8fc5-8a08034c4d96	c73.9	notreported	-21587	notreported	notreported
BLCA	c67.3	male	stageiii	nothispanicorlatino	white	BLCA_unc.edu.9da50002-f2ba-4a66-8668-79386cf5ea4d.2509001.rsem.isoforms.results	383bf27a-9216-492e-b4bd-2b4eef8278de	c67.3	1957	2.356164383561644	100.0	null	null	0.0030864197530864196	null	180.0	Primary Tumor	notreported	20683	alive	null	null	null	359.0	null	null	25c83ece-f258-58f4-8ab6-ecd163f48f53	c67.3	notreported	-20683	notreported	notreported
THCA	c73	female	stagei	hispanicorlatino	white	THCA_unc.edu.cfd4785f-1844-4274-8892-e2e558cb112a.1378135.rsem.isoforms.results	934a58af-0ffc-487e-9e95-fa7643b7d5cb	c73.9	1983	null	null	null	null	null	null	null	Primary Tumor	notreported	8344	alive	null	null	null	3243.0	null	null	ea1a64d2-b7f6-5f82-a0c9-17c5bc8138d3	c73.9	notreported	-8344	notreported	notreported
THCA	c73	female	stageiva	notreported	notreported	THCA_unc.edu.a872e4e0-b63c-4f88-a5c9-ceb9aa751304.1901101.rsem.isoforms.results	12f90efb-c45b-4372-8197-2dfd9ca247ea	c73.9	1953	null	null	null	null	null	null	null	Primary Tumor	notreported	21595	alive	null	null	null	162.0	null	null	2caa5ea5-ca88-51b3-a4a7-eed49af79d02	c73.9	notreported	-21595	notreported	notreported
BLCA	c67.3	male	stageiii	nothispanicorlatino	white	BLCA_unc.edu.8ac289ba-c81f-44ed-9fb4-8c2af9eccdb0.2503601.rsem.isoforms.results	cea28eac-4442-4436-b737-536e45b89989	c67.3	1931	1.643835616438356	85.0	null	null	0.0027131411790992373	null	177.0	Primary Tumor	notreported	30090	dead	null	340.0	null	null	null	null	13cd6aea-e2d5-50af-a433-2a9763667566	c67.3	notreported	-30090	notreported	notreported
THCA	c73	female	stageii	notreported	notreported	THCA_unc.edu.8900f950-c646-4cec-9d10-f0c2d75fe7ca.1563976.rsem.isoforms.results	c2291b36-7b7f-4c07-a164-6600d9e7929f	c73.9	1940	null	null	null	null	null	null	null	Primary Tumor	notreported	26158	alive	null	null	null	529.0	null	null	dd2f454f-bd03-54ed-9cdf-da858d9aad68	c73.9	notreported	-26158	notreported	notreported
BLCA	c67.2	male	stageiv	nothispanicorlatino	white	BLCA_unc.edu.0ccf81b2-c760-4a37-acf1-c692868167b1.2650734.rsem.isoforms.results	5db4b168-a6ba-482c-b067-2274eba96aad	c67.2	1933	3.0136986301369864	74.0	null	null	0.0024441802087462015	null	174.0	Primary Tumor	notreported	25196	alive	null	null	null	5041.0	null	null	1b1a6ccd-e251-5407-a882-685a6250fdc6	c67.2	notreported	-25196	notreported	notreported
LGG	c71.9	male	notreported	notreported	white	LGG_unc.edu.84c59879-1b8a-4750-8069-9d0e434fa0dc.1660117.rsem.isoforms.results	97bf8065-3e7d-4702-a426-24908f4d66a4	c71.9	1965	null	null	null	null	null	null	null	Primary Tumor	notreported	14920	alive	null	null	null	8.0	null	null	3edd6e87-1098-50b5-91e5-cbd4cd3a5b0e	c71.9	notreported	-14920	notreported	notreported
THCA	c73	male	stageiii	hispanicorlatino	white	THCA_unc.edu.6e1468f5-a1f6-4d15-a355-39069bdf9067.1816890.rsem.isoforms.results	00b62df6-1189-4e38-8601-70416e05550d	c73.9	1961	null	null	null	null	null	null	null	Primary Tumor	notreported	18969	alive	null	null	null	427.0	null	null	034d8c8c-fc73-5f64-ae17-47e1d12c2052	c73.9	notreported	-18969	notreported	notreported
BLCA	c67.9	male	stageii	nothispanicorlatino	asian	BLCA_unc.edu.a5118740-bf71-47e8-a2e3-506792865c90.2090047.rsem.isoforms.results	5d06cc19-8b10-4ed1-b6d4-8e044f1f8a8c	c67.9	1945	1.36986301369863	57.0	null	null	0.0022265625	null	160.0	Primary Tumor	notreported	24528	alive	null	null	null	20.0	null	null	5cc196ff-ea8f-5a84-8ed5-37d9068875a3	c67.9	notreported	-24528	notreported	notreported
GBM	c71.9	female	notreported	nothispanicorlatino	white	GBM_unc.edu.67068dc6-6270-4e7b-a857-3008dadc2d59.1541797.rsem.isoforms.results	d1547b99-3c96-4c62-8261-5111bcf860a9	c71.9	1965	null	null	null	null	null	null	null	Primary Tumor	notreported	16662	alive	null	null	null	187.0	null	null	983c6a79-0bd7-5cc5-8f21-dd2c67e3d644	c71.9	notreported	-16662	notreported	notreported
OV	c56.9	female	notreported	notreported	white	OV_unc.edu.7e5d2390-1e04-4e46-aa48-4b0131076007.1533940.rsem.isoforms.results	6fb71a0c-bc50-48c8-acfa-db94be1e151a	c56.9	1929	null	null	null	null	null	null	null	Primary Tumor	notreported	26300	alive	null	null	null	3096.0	null	null	ebc68b2a-3891-5bad-92aa-ae5e37033678	c56.9	notreported	-26300	notreported	notreported
LGG	c71.2	male	notreported	nothispanicorlatino	white	LGG_unc.edu.9ea1bff8-51a1-4773-851c-5c8da0e79565.1957695.rsem.isoforms.results	ae61a71e-53a1-4884-a4a6-729744d1c309	c71.2	1982	null	null	null	null	null	null	null	Primary Tumor	notreported	11195	alive	null	null	null	573.0	null	null	79fa0673-5b43-5046-9487-4b0be1e7ce75	c71.2	notreported	-11195	notreported	notreported
BLCA	c67.9	male	stageiv	nothispanicorlatino	white	BLCA_unc.edu.bdf3914e-37f0-4dc2-a246-b22c6ee15f81.2545783.rsem.isoforms.results	b319798a-3f35-4902-8ecf-5be529d99312	c67.9	1921	3.0136986301369864	95.0	null	null	0.0027757487216946678	null	185.0	Primary Tumor	notreported	30362	dead	null	98.0	null	null	null	null	77c02230-8a64-5810-b17a-024b09888c4e	c67.9	notreported	-30362	notreported	notreported
OV	c56.9	female	notreported	notreported	white	OV_unc.edu.eb8cb3b3-d1b1-4d2d-b048-7394931040bd.1519493.rsem.isoforms.results	4c18d9cf-4af4-4a86-8b1c-f78795fbbd7e	c56.9	1932	null	null	null	null	null	null	null	Primary Tumor	notreported	24747	dead	null	1384.0	null	1384.0	null	null	dc319f5b-52f4-5442-b2fd-18f751b79b72	c56.9	notreported	-24747	notreported	notreported
LGG	c71.0	male	notreported	nothispanicorlatino	white	LGG_unc.edu.c0c1d679-b9d4-4146-bf2e-7816648ef557.1977459.rsem.isoforms.results	1f33aebc-edc1-42c5-baa9-e4b0a06fcb26	c71.0	1991	null	null	null	null	null	null	null	Primary Tumor	notreported	7716	alive	null	null	null	72.0	null	null	c473d1d7-4a36-5e7a-a220-b2642485a19d	c71.0	notreported	-7716	notreported	notreported
THCA	c73	female	stagei	nothispanicorlatino	white	THCA_unc.edu.0f89ce40-61ea-430f-87d1-be87d9ac924f.1661304.rsem.isoforms.results	58ff4366-20a3-40a2-a87a-551e17cdb5d3	c73.9	1990	null	null	null	null	null	null	null	Primary Tumor	notreported	7900	alive	null	null	null	550.0	null	null	08c12da4-e534-5e51-b91a-fb63124f811d	c73.9	notreported	-7900	notreported	notreported
THCA	c73	male	stagei	nothispanicorlatino	white	THCA_unc.edu.619741f2-4f5e-41ab-9033-bfc0dd525750.1215500.rsem.isoforms.results	edb90376-0ef9-47dd-be6f-a6e8a0380a9c	c73.9	1984	null	null	null	null	null	null	null	Primary Tumor	notreported	9664	alive	null	null	null	1077.0	null	null	627a005f-1051-5794-b3bb-db87a7844354	c73.9	notreported	-9664	notreported	notreported
LGG	c71.0	male	notreported	nothispanicorlatino	white	LGG_unc.edu.355c3ccb-f1c3-4e73-a41a-7a3ece9a5f6b.1573839.rsem.isoforms.results	029b33b1-7ea9-4b77-a615-7eb0e3ebd5e7	c71.0	1981	null	null	null	null	null	null	null	Primary Tumor	notreported	11252	alive	null	null	null	992.0	null	null	a0ab338e-b9af-5a01-9470-3e2add0f79e5	c71.0	notreported	-11252	notreported	notreported
OV	c56.9	female	notreported	nothispanicorlatino	white	OV_unc.edu.a3083fd8-f5d0-486b-bf3d-31ae094b1cbf.2722951.rsem.isoforms.results	3f917550-89a6-404b-94df-938c99121411	c56.9	1935	null	null	null	null	null	null	null	Primary Tumor	notreported	24488	dead	null	627.0	null	627.0	null	null	8a7f1425-a395-5f52-8f54-d892a3e2f7e7	c56.9	notreported	-24488	notreported	notreported
THCA	c73	male	stagei	hispanicorlatino	white	THCA_unc.edu.70dd0d77-092f-4770-82c6-e6b37b800ad2.1666710.rsem.isoforms.results	64de42bd-d134-4f44-82fa-d6614709bf01	c73.9	1973	null	null	null	null	null	null	null	Primary Tumor	notreported	13103	alive	null	null	null	1808.0	null	null	06d4f335-666d-5da9-be54-00ff26df5f41	c73.9	notreported	-13103	notreported	notreported
THCA	c73	female	stageiii	nothispanicorlatino	white	THCA_unc.edu.bb5be7ff-d74c-41f6-b3c7-9f79f494c024.1657948.rsem.isoforms.results	3bfa52af-cb40-45d8-9bdc-591985aae7fb	c73.9	1929	null	null	null	null	null	null	null	Primary Tumor	notreported	28924	alive	null	null	null	2211.0	null	null	a5f9196f-ddec-55b9-959b-b627193db01c	c73.9	notreported	-28924	notreported	notreported
LGG	c71.0	male	notreported	nothispanicorlatino	white	LGG_unc.edu.fca6dae9-687d-418d-bf8b-61bbf6927f61.1533544.rsem.isoforms.results	5f10cd91-1e03-4016-b35a-8629a1a8fcc9	c71.0	1948	null	null	null	null	null	null	null	Primary Tumor	notreported	23374	dead	null	561.0	null	413.0	null	null	a95f17d2-a0d6-5938-8de7-8835091fc309	c71.0	notreported	-23374	notreported	notreported
THCA	c73	female	stagei	nothispanicorlatino	white	THCA_unc.edu.9434a419-0eeb-4952-a60c-a8afe98a0347.1251507.rsem.isoforms.results	6ad260ad-769a-4f3c-bd07-927adf6b2338	c73.9	1980	null	null	null	null	null	null	null	Primary Tumor	notreported	11227	alive	null	null	null	658.0	null	null	70dfb800-8ac0-598d-8bd0-d8bb2d1a26ee	c73.9	notreported	-11227	notreported	notreported
BLCA	c67.9	male	stageii	nothispanicorlatino	asian	BLCA_unc.edu.58e49daa-eced-4ca8-af92-98af61f8b6f1.2038998.rsem.isoforms.results	4cc25adb-6db4-46aa-9fc9-c2c6339fb6d3	c67.9	1953	null	49.0	null	null	0.0019628264701169683	null	158.0	Primary Tumor	notreported	21734	alive	null	null	null	399.0	null	null	55a50de8-e653-5d01-b1c7-939d441631d7	c67.9	notreported	-21734	notreported	notreported
THCA	c73	female	stagei	nothispanicorlatino	white	THCA_unc.edu.9a8ae8e6-6343-4e09-8d87-4f87002993a9.1666298.rsem.isoforms.results	3d8b7654-b403-4360-80dc-8273ca90c2dc	c73.9	1966	null	null	null	null	null	null	null	Solid Tissue Normal	notreported	15121	alive	null	null	null	1575.0	null	null	b3aa8822-2f57-5c3a-ae4a-d8d77ae347b8	c73.9	notreported	-15121	notreported	notreported
THCA	c73	female	stageii	notreported	notreported	THCA_unc.edu.9ed1d311-747a-434e-9ab4-5df6bc6b75de.1665752.rsem.isoforms.results	24cf6397-60ef-4635-81f0-78a67157aac0	c73.9	1956	null	null	null	null	null	null	null	Primary Tumor	notreported	20284	alive	null	null	null	822.0	null	null	a385cf6f-4cf5-5ead-808b-cb4d9f3d84a6	c73.9	notreported	-20284	notreported	notreported
GBM	c71.9	female	notreported	nothispanicorlatino	white	GBM_unc.edu.37218c7d-74ed-43db-9556-a09006645998.1543869.rsem.isoforms.results	af055b98-be6a-4012-ac64-f1b6539b23d0	c71.9	1955	null	null	null	null	null	null	null	Primary Tumor	notreported	20063	dead	null	357.0	null	342.0	null	null	c5a691c9-42ea-559b-990d-272ecb64542a	c71.9	notreported	-20063	notreported	notreported
LGG	c71.0	female	notreported	nothispanicorlatino	white	LGG_unc.edu.d63ec2f9-d8ca-4738-9d0f-00f93e7ac897.2412284.rsem.isoforms.results	70939245-41e0-4845-a473-5fef719b9828	c71.0	1966	null	null	null	null	null	null	null	Recurrent Tumor	notreported	13021	dead	null	2875.0	null	null	null	null	565864af-a56b-5295-a390-a1428019ff15	c71.0	notreported	-13021	notreported	notreported
LGG	c71.0	male	notreported	nothispanicorlatino	white	LGG_unc.edu.f64b490b-d38e-4c20-aa98-a6c636d81123.2308708.rsem.isoforms.results	a343fbe3-147a-4656-9e90-5408298ca12c	c71.0	1966	null	null	null	null	null	null	null	Primary Tumor	notreported	16890	dead	null	742.0	null	698.0	null	null	7a3e1af7-22d0-533d-9075-d7b4233acac8	c71.0	notreported	-16890	notreported	notreported
LGG	c71.0	male	notreported	nothispanicorlatino	white	LGG_unc.edu.f2996be3-1bd5-43c8-9d91-728948c78994.2314974.rsem.isoforms.results	82fd02ab-d628-469f-8853-4c603cf04964	c71.0	1963	null	null	null	null	null	null	null	Primary Tumor	notreported	18429	alive	null	null	null	706.0	null	null	3d40162e-6f5a-52b6-a6dc-392dcfda34c7	c71.0	notreported	-18429	notreported	notreported
THCA	c73	female	stagei	nothispanicorlatino	white	THCA_unc.edu.910ddc69-2ad3-4c0d-8b2d-d5d09b6bd2e6.1656813.rsem.isoforms.results	3d8b7654-b403-4360-80dc-8273ca90c2dc	c73.9	1966	null	null	null	null	null	null	null	Primary Tumor	notreported	15121	alive	null	null	null	1575.0	null	null	b3aa8822-2f57-5c3a-ae4a-d8d77ae347b8	c73.9	notreported	-15121	notreported	notreported
BLCA	c67.4	male	stageiii	nothispanicorlatino	white	BLCA_unc.edu.edde0611-3cdb-4f1c-a259-68cb4a905bea.1782213.rsem.isoforms.results	2ab0fb7b-ad2a-403d-9411-712974ccd878	c67.4	1954	null	85.0	null	null	0.0024569314371603655	null	186.0	Primary Tumor	notreported	20909	alive	null	null	null	633.0	null	null	eda5667e-cebb-5db4-9c87-a527f84c22d4	c67.4	notreported	-20909	notreported	notreported
GBM	c71.9	male	notreported	nothispanicorlatino	white	GBM_unc.edu.f2d1056f-1329-44e4-8269-0e7dde93d64a.1532549.rsem.isoforms.results	c931f3bd-74c5-4ebd-bc0f-c7c6becd25ab	c71.9	1955	null	null	null	null	null	null	null	Primary Tumor	notreported	19503	dead	null	432.0	null	286.0	null	null	e8e0c42e-0a7c-5d90-93a3-83c957fca3e7	c71.9	notreported	-19503	notreported	notreported
THCA	c73	female	stageiii	nothispanicorlatino	white	THCA_unc.edu.d854dced-2ce0-415a-90b2-54d54ca31702.1215975.rsem.isoforms.results	212aa9c4-610d-4286-9ca2-ae6c87b9bc0e	c73.9	1959	null	null	null	null	null	null	null	Primary Tumor	notreported	18692	alive	null	null	null	1600.0	null	null	d286b8dc-ff3a-5106-a5e2-fc57cbefb6b4	c73.9	notreported	-18692	notreported	notreported
THCA	c73	female	stagei	nothispanicorlatino	white	THCA_unc.edu.b174413d-e07a-4a7a-8cfe-43833a4890d9.1655475.rsem.isoforms.results	9dcaa676-10ca-48cb-b245-7cc4bd1fe9bb	c73.9	1974	null	null	null	null	null	null	null	Primary Tumor	notreported	12603	alive	null	null	null	2535.0	null	null	cdc62d67-5974-5b43-8c8d-8f2de48c16f3	c73.9	notreported	-12603	notreported	notreported
OV	c56.9	female	notreported	nothispanicorlatino	white	OV_unc.edu.bc200f3a-6d31-4480-8785-987f14cfa319.2722826.rsem.isoforms.results	33dc48d8-2e01-482b-944c-ac10da727ec9	c56.9	1955	null	null	null	null	null	null	null	Primary Tumor	notreported	19605	alive	null	null	null	122.0	null	null	ad8f87df-db51-56a1-840d-89f7e394ab23	c56.9	notreported	-19605	notreported	notreported
LGG	c71.0	male	notreported	hispanicorlatino	white	LGG_unc.edu.6899de21-8648-45fa-a519-679b0438f848.1815953.rsem.isoforms.results	f625e522-226b-450f-af94-dd2f5adb605e	c71.0	1965	null	null	null	null	null	null	null	Primary Tumor	notreported	17499	alive	null	null	null	478.0	null	null	011901a5-f805-580a-aa4a-b05e23f9ac93	c71.0	notreported	-17499	notreported	notreported
THCA	c73	male	stageiva	nothispanicorlatino	white	THCA_unc.edu.b127c23e-b16b-4402-8a0c-764867fc6b52.1901767.rsem.isoforms.results	86d5865e-6a1c-467c-97c9-47460b77f5a4	c73.9	1956	null	null	null	null	null	null	null	Primary Tumor	notreported	20108	alive	null	null	null	1076.0	null	null	542db69b-8422-5110-9f54-37ced024f0b3	c73.9	notreported	-20108	notreported	notreported
BLCA	c67.9	male	stageiv	nothispanicorlatino	white	BLCA_unc.edu.9e523e29-ea79-4124-97b4-d9c8686b3ddc.2647062.rsem.isoforms.results	9d7fbdeb-ea3d-4e07-8527-23c5997d77cf	c67.9	1948	2.191780821917808	89.0	null	null	0.002657589059094031	null	183.0	Primary Tumor	notreported	21951	dead	null	565.0	null	null	null	null	4e6548e6-67c8-5699-84b1-668f007839fd	c67.9	notreported	-21951	notreported	notreported
THCA	c73	male	stagei	notreported	notreported	THCA_unc.edu.1fdbc7ad-2c2e-428d-b98d-7a532135eae9.1903124.rsem.isoforms.results	8dd09d74-0be8-4c58-bf44-de4a2466d044	c73.9	1984	null	null	null	null	null	null	null	Primary Tumor	notreported	10316	alive	null	null	null	655.0	null	null	9f2fc655-84c2-5317-91fc-da9982723579	c73.9	notreported	-10316	notreported	notreported
LGG	c71.0	female	notreported	nothispanicorlatino	white	LGG_unc.edu.b3c8bb05-15a1-483a-a93e-a7733e32f983.2331116.rsem.isoforms.results	f5268956-789d-4b22-8f19-a3ac9353d33d	c71.0	1985	null	null	null	null	null	null	null	Primary Tumor	notreported	9919	alive	null	null	null	650.0	null	null	67efa665-c22c-5c1d-bab3-c18b47bb5458	c71.0	notreported	-9919	notreported	notreported
GBM	c71.9	female	notreported	nothispanicorlatino	white	GBM_unc.edu.e48c8261-5e7b-4cbe-95ed-8a7d1c356d70.1536343.rsem.isoforms.results	51c3409d-5df7-4720-83db-0e6de065f82c	c71.9	1935	null	null	null	null	null	null	null	Primary Tumor	notreported	27584	dead	null	83.0	null	83.0	null	null	5722b0ce-c407-5a75-bc4d-a68e67add7f4	c71.9	notreported	-27584	notreported	notreported
BLCA	c67.9	male	stageii	nothispanicorlatino	white	BLCA_unc.edu.3208f694-4779-4548-8cb4-74df829b3345.1474536.rsem.isoforms.results	bd7f2c90-863e-4380-ad31-8755bcb2f975	c67.9	1952	null	111.0	null	null	0.0036244897959183675	null	175.0	Primary Tumor	notreported	21668	alive	null	null	null	484.0	null	null	41dfe3db-ffb5-5f31-958a-9cf6373aaa19	c67.9	notreported	-21668	notreported	notreported
THCA	c73	female	stageiii	nothispanicorlatino	white	THCA_unc.edu.b0c0055f-55c8-447a-9590-fd1ae77c7128.1901840.rsem.isoforms.results	3d952b80-501e-41c6-a3af-0bd6014b81e4	c73.9	1954	null	null	null	null	null	null	null	Primary Tumor	notreported	20290	alive	null	null	null	1856.0	null	null	64678ad0-edad-5939-aede-76dac5e65798	c73.9	notreported	-20290	notreported	notreported
OV	c56.9	female	notreported	nothispanicorlatino	white	OV_unc.edu.cd401b89-ae05-4775-94b0-6800f88652b0.1518985.rsem.isoforms.results	2ee36d9d-128b-4761-aa1a-a637da106f3d	c56.9	1929	null	null	null	null	null	null	null	Primary Tumor	notreported	26602	dead	null	395.0	null	365.0	null	null	b3861530-7540-5dbb-af8a-d27f40d5b8d0	c56.9	notreported	-26602	notreported	notreported
BLCA	c67.9	female	stageiv	nothispanicorlatino	white	BLCA_unc.edu.ccc9fcec-f07a-498b-9389-9c2b3aa0d2bf.2647099.rsem.isoforms.results	ed36d054-53c4-465c-bd84-6ec5227097bf	c67.9	1926	null	52.0	null	null	0.00203125	null	160.0	Primary Tumor	notreported	29667	dead	null	1348.0	null	null	null	null	dd213a6d-0366-5584-969c-b19b1390f240	c67.9	notreported	-29667	notreported	notreported
LGG	c71.0	male	notreported	hispanicorlatino	white	LGG_unc.edu.5c27c4d4-b3e7-4e44-a2c4-764b665d1bc0.2330709.rsem.isoforms.results	f878bf8d-70eb-4b74-bf74-bdf63cb9bfae	c71.0	1978	null	null	null	null	null	null	null	Primary Tumor	notreported	11804	dead	null	821.0	null	null	null	null	d024dcd6-764e-52b9-9f7b-361c3010fae6	c71.0	notreported	-11804	notreported	notreported
THCA	c73	female	stageiii	nothispanicorlatino	white	THCA_unc.edu.303a2167-c633-4d5b-9acb-93003b9c5d0f.1366223.rsem.isoforms.results	3dcee02c-a3d2-4188-a072-4d36c8a7e8fd	c73.9	1955	null	null	null	null	null	null	null	Primary Tumor	notreported	19671	alive	null	null	null	81.0	null	null	72390f11-2d13-5f4e-ba83-f09860ad7c8b	c73.9	notreported	-19671	notreported	notreported
LGG	c71.0	female	notreported	nothispanicorlatino	blackorafricanamerican	LGG_unc.edu.bf983be3-abeb-44d7-a9e5-12186d6d303d.2325473.rsem.isoforms.results	98e82e98-341a-4bca-92c0-23c65c1bf94f	c71.0	1958	null	null	null	null	null	null	null	Primary Tumor	notreported	19717	alive	null	null	null	328.0	null	null	6db74e47-a996-5463-853a-6416b46a263a	c71.0	notreported	-19717	notreported	notreported
THCA	c73	male	stageiii	nothispanicorlatino	blackorafricanamerican	THCA_unc.edu.c51d483d-2610-43c7-9c06-dfcf4ddff9aa.1326862.rsem.isoforms.results	dd981e11-4b49-447e-8ebc-d9db4b55ce9b	c73.9	1939	null	null	null	null	null	null	null	Primary Tumor	notreported	25696	alive	null	null	null	1506.0	null	null	9eee8144-a65d-5e0f-a9b8-4281a9adbb4b	c73.9	notreported	-25696	notreported	notreported
OV	c56.9	female	notreported	notreported	white	OV_unc.edu.d85ca8ac-9458-4f3a-b2ef-db4df852f75e.1519625.rsem.isoforms.results	62efb5ae-43dc-4a4c-a898-6cd9c6dba027	c56.9	1945	null	null	null	null	null	null	null	Primary Tumor	notreported	19387	dead	null	2467.0	null	2467.0	null	null	2cd199cc-198a-518f-b3da-a3f3640b2ba7	c56.9	notreported	-19387	notreported	notreported
OV	c56.9	female	notreported	notreported	white	OV_unc.edu.e76a7745-3193-4650-9a7a-c96329690be3.1518557.rsem.isoforms.results	48f831b0-5d91-44ae-bc4e-db57ca84fe46	c56.9	1954	null	null	null	null	null	null	null	Primary Tumor	notreported	19775	alive	null	null	null	238.0	null	null	4b027297-035f-56ce-821c-31213eea6b4c	c56.9	notreported	-19775	notreported	notreported
GBM	null	null	null	null	null	GBM_unc.edu.94f66829-3cef-4af2-9f97-2352ac85efee.2403672.rsem.isoforms.results	null	null	null	null	null	null	null	null	null	null	Solid Tissue Normal	null	null	null	null	null	null	null	null	null	null	null	null	null	null	null
BLCA	c67.4	female	stageiii	nothispanicorlatino	blackorafricanamerican	BLCA_unc.edu.341d1383-93bd-42d7-80ad-5dba732c1925.2116228.rsem.isoforms.results	05a1402e-5a79-4d54-9430-065844ed1505	c67.4	1953	null	74.0	null	null	0.002890625	null	160.0	Primary Tumor	notreported	22000	dead	null	406.0	null	368.0	null	null	2cf6942d-9444-505a-a4fc-2cd5ba4eb87b	c67.4	notreported	-22000	notreported	notreported
OV	c56.9	female	notreported	nothispanicorlatino	white	OV_unc.edu.29c4cab9-c19e-4416-ad88-484cc02a980f.1563444.rsem.isoforms.results	6a1be87b-c4e0-4fd4-b050-50a245b22038	c56.9	1929	null	null	null	null	null	null	null	Primary Tumor	notreported	26687	dead	null	9.0	null	9.0	null	null	407c0da4-f263-5ceb-abd5-c62004aaf0b5	c56.9	notreported	-26687	notreported	notreported
THCA	c73	male	stageiva	nothispanicorlatino	notreported	THCA_unc.edu.cdee4003-1526-465c-a028-270254f22141.1670089.rsem.isoforms.results	b82e08e3-ae79-404a-a501-0d501df84b8b	c73.9	1954	null	null	null	null	null	null	null	Primary Tumor	notreported	20496	alive	null	null	null	1125.0	null	null	c9f67b43-908b-5303-9893-71ced224228d	c73.9	notreported	-20496	notreported	notreported
THCA	c73	female	stageiii	notreported	notreported	THCA_unc.edu.c4b02af4-2fea-44a7-bdf4-e983f681301b.1919394.rsem.isoforms.results	0ad2a2b3-c1bb-4597-b28e-a6385f93d09c	c73.9	1936	null	null	null	null	null	null	null	Solid Tissue Normal	notreported	26143	alive	null	null	null	2391.0	null	null	36a80807-fcfd-57a6-a4e4-357a440a7176	c73.9	notreported	-26143	notreported	notreported
BLCA	c67.0	female	stageiv	nothispanicorlatino	white	BLCA_unc.edu.6f3cb879-cf6d-4347-8aae-b6a6ee7a4274.1349287.rsem.isoforms.results	9dd97821-7afd-4982-8b1d-f14f845b79f7	c67.0	1933	null	100.0	null	null	0.0038578758535550324	null	161.0	Primary Tumor	notreported	28673	dead	null	623.0	null	111.0	null	null	3ba185d1-3035-5306-8a83-1607b6e86620	c67.0	notreported	-28673	notreported	notreported
GBM	c71.9	male	notreported	nothispanicorlatino	white	GBM_unc.edu.152afe8c-f67c-4d7c-93ac-e1b7edd56c54.1544625.rsem.isoforms.results	5c984433-33cf-42fc-b3ba-511efcdcab19	c71.9	1950	null	null	null	null	null	null	null	Recurrent Tumor	notreported	17515	dead	null	360.0	null	360.0	null	null	cec1bfa2-94cf-5bf5-ad44-d1aad1c78586	c71.9	notreported	-17515	notreported	notreported
BLCA	c67.9	male	stageii	notreported	white	BLCA_unc.edu.b76b37cf-c9af-419d-a7c4-f97747de2946.2504734.rsem.isoforms.results	5df620fa-44d9-4361-91d0-f242e3e5e595	c67.9	1939	null	92.0	null	null	0.0029036737785633126	null	178.0	Primary Tumor	notreported	26873	dead	null	19.0	null	null	null	null	611171be-a1c7-517b-9e9f-0bf5e12d5341	c67.9	notreported	-26873	notreported	notreported
THCA	c73	female	stageivc	nothispanicorlatino	white	THCA_unc.edu.c8125aaf-e8de-4c26-ab88-2f22d8933d21.1566504.rsem.isoforms.results	ea2c873a-ea52-4920-8d20-554d5fa8ddc1	c73.9	1938	null	null	null	null	null	null	null	Solid Tissue Normal	notreported	24178	dead	null	1753.0	null	null	null	null	f06f7a80-02ce-5812-915a-c26d9b2293ca	c73.9	notreported	-24178	notreported	notreported
BLCA	c67.9	female	stageii	nothispanicorlatino	white	BLCA_unc.edu.159e6f18-943e-4e7b-af13-da273c52dc16.2157496.rsem.isoforms.results	54c04bcc-ebd5-461e-bbd5-b4d791b00c95	c67.9	1922	null	61.0	null	null	0.002324340801707057	null	162.0	Primary Tumor	notreported	32872	dead	null	272.0	null	81.0	null	null	ce6beb0f-1164-5e48-8ca6-d79f4c573b35	c67.9	notreported	-32872	notreported	notreported
LGG	c71.0	female	notreported	nothispanicorlatino	white	LGG_unc.edu.013bac31-4670-460a-9108-7b4ae57a2e21.2055516.rsem.isoforms.results	2cfc07f3-a31c-41a2-a9e3-b708d2421a78	c71.0	1969	null	null	null	null	null	null	null	Recurrent Tumor	notreported	14249	dead	null	1120.0	null	979.0	null	null	96c6df9b-0815-50d1-afe1-f014111a9083	c71.0	notreported	-14249	notreported	notreported
LGG	c71.9	male	notreported	nothispanicorlatino	white	LGG_unc.edu.35db896d-9e7c-47df-933f-4eb547913394.1509736.rsem.isoforms.results	a0bc5147-d9b4-41fd-8df3-a241d23722e8	c71.9	1966	null	null	null	null	null	null	null	Primary Tumor	notreported	12655	dead	null	2433.0	null	null	null	null	427d81fd-19dc-5876-b4dd-a20f5dc8a2e7	c71.9	notreported	-12655	notreported	notreported
BLCA	c67.9	male	stageiii	nothispanicorlatino	white	BLCA_unc.edu.5676c0ee-c460-492c-bf00-73d5ddb1d647.1468858.rsem.isoforms.results	a0bcf1b1-4dd4-4d7f-b63e-b49296671451	c67.9	1957	2.191780821917808	null	null	null	null	null	null	Primary Tumor	notreported	20021	alive	null	null	null	582.0	null	null	dd9c14f3-3c34-59b9-a848-414348c9a543	c67.9	notreported	-20021	notreported	notreported
BLCA	c67.0	male	stageii	nothispanicorlatino	white	BLCA_unc.edu.d1b0c4db-59b7-47ac-b26f-fb14c5aac200.2097119.rsem.isoforms.results	01c815ba-7bda-4f7e-865c-0c5776febf2c	c67.0	1940	1.36986301369863	95.0	null	null	0.003174178890039761	null	173.0	Primary Tumor	notreported	25644	alive	null	null	null	1621.0	null	null	dc86318c-5077-50b5-a869-e7ba4bdc71ee	c67.0	notreported	-25644	notreported	notreported
THCA	c73	male	stagei	nothispanicorlatino	white	THCA_unc.edu.a60b88ff-4c3b-4da1-b071-b16d13ded954.1266966.rsem.isoforms.results	25d8a79e-15fd-4c8a-a7f6-05d78973b757	c73.9	1986	null	null	null	null	null	null	null	Primary Tumor	notreported	9221	alive	null	null	null	659.0	null	null	b15ac013-b9c0-583d-bbeb-5dacac81cf88	c73.9	notreported	-9221	notreported	notreported
BLCA	c67.2	male	stageiv	nothispanicorlatino	white	BLCA_unc.edu.029cb0c8-9a67-4af0-9137-a5fbe08fce20.1474847.rsem.isoforms.results	3071cb51-dcf5-41f7-b047-afc2dcbf0aaf	c67.2	1946	3.287671232876712	89.0	null	null	0.0023167430237401084	null	196.0	Primary Tumor	notreported	22687	dead	null	1423.0	null	null	null	null	3899b702-eafc-51a2-aa24-2e36e34fbfde	c67.2	notreported	-22687	notreported	notreported
THCA	c73	female	stagei	nothispanicorlatino	white	THCA_unc.edu.507e9f4a-c9b8-42f9-923c-d6061645e845.1566515.rsem.isoforms.results	e4c85bdd-7b7c-414f-9503-647d9b825915	c73.9	1981	null	null	null	null	null	null	null	Primary Tumor	notreported	9724	alive	null	null	null	2075.0	null	null	af442f48-221a-5092-8240-5f53c3e32a9a	c73.9	notreported	-9724	notreported	notreported
THCA	c73	male	stageii	nothispanicorlatino	white	THCA_unc.edu.2e4e9b2d-605f-4ce2-ab37-ba8774cbda25.1901389.rsem.isoforms.results	89f4a6a5-bf9b-4a0e-bacf-8cd715c2ca93	c73.9	1941	null	null	null	null	null	null	null	Primary Tumor	notreported	24980	alive	null	null	null	1455.0	null	null	72bd3463-53ab-512a-8b5a-5489d3373b19	c73.9	notreported	-24980	notreported	notreported
LGG	c71.9	male	notreported	nothispanicorlatino	white	LGG_unc.edu.52c20e74-8d7a-4e11-8981-8d2d32a33a32.1567344.rsem.isoforms.results	a96fabfa-e830-476a-b2a1-899689570bd9	c71.9	1967	null	null	null	null	null	null	null	Primary Tumor	notreported	16137	alive	null	null	null	1227.0	null	null	b2018ff2-e648-505d-a20d-503eba2b0969	c71.9	notreported	-16137	notreported	notreported
OV	c56.9	female	notreported	nothispanicorlatino	white	OV_unc.edu.939d41b7-9ccb-4cf6-be16-f2792aece5eb.2723382.rsem.isoforms.results	171f7917-69eb-4a3f-9cc0-0e1dffd412c1	c56.9	1930	null	null	null	null	null	null	null	Primary Tumor	notreported	25734	dead	null	2218.0	null	2218.0	null	null	6f5d29ee-4ea0-5da7-be01-e7daeef0d99f	c56.9	notreported	-25734	notreported	notreported
THCA	c73	female	stageiva	hispanicorlatino	white	THCA_unc.edu.389d9804-ea66-4e27-8808-295a9eb16697.1590148.rsem.isoforms.results	8392edea-82b3-4610-87a0-f545f673e922	c73.9	1923	null	null	null	null	null	null	null	Primary Tumor	notreported	32682	alive	null	null	null	563.0	null	null	29c1acff-9c6e-52f6-b4cd-3e3490ad20d8	c73.9	notreported	-32682	notreported	notreported
LGG	c71.0	male	notreported	notreported	white	LGG_unc.edu.055357fc-1a16-4ff4-a826-2e87a9e99190.2408371.rsem.isoforms.results	09552b53-4393-4811-a671-a9ef6eff4790	c71.0	1990	null	null	null	null	null	null	null	Primary Tumor	notreported	7380	alive	null	null	null	1320.0	null	null	0bf6c3df-9d51-5eb0-83dd-eba119035a00	c71.0	notreported	-7380	notreported	notreported
LGG	c71.0	female	notreported	nothispanicorlatino	white	LGG_unc.edu.ef3a0956-e7bf-4f1b-bc54-7e21fd318bbd.1670469.rsem.isoforms.results	ca427acb-034e-42e2-961a-b9d5dc30b741	c71.0	1970	null	null	null	null	null	null	null	Primary Tumor	notreported	15197	alive	null	null	null	84.0	null	null	ec16f9d9-31e6-5d85-800b-1c7bcd538b4f	c71.0	notreported	-15197	notreported	notreported
LGG	c71.0	male	notreported	nothispanicorlatino	white	LGG_unc.edu.3fea413e-d892-461c-b0e3-cf07efaf860c.1671986.rsem.isoforms.results	40343ebd-0d62-401e-83a4-6cdb57662ec0	c71.0	1969	null	null	null	null	null	null	null	Primary Tumor	notreported	14496	alive	null	null	null	585.0	null	null	9f64b4a5-5209-510c-84f2-304ea8c5b3aa	c71.0	notreported	-14496	notreported	notreported
LGG	c71.0	male	notreported	nothispanicorlatino	white	LGG_unc.edu.eeaff3a7-d9d4-41b9-8c58-52e16f6a71a0.2346830.rsem.isoforms.results	58650d08-7685-41de-9ae0-21665f8f449f	c71.0	1966	null	null	null	null	null	null	null	Primary Tumor	notreported	17134	alive	null	null	null	914.0	null	null	bcac39f9-4ba0-599e-85b8-a529e361d038	c71.0	notreported	-17134	notreported	notreported
LGG	c71.0	female	notreported	nothispanicorlatino	white	LGG_unc.edu.07c85322-ff5e-4e17-b6d8-bec6305fe14e.2031655.rsem.isoforms.results	8655fa51-d784-4f8d-9bc8-f1da7303d22f	c71.0	1942	null	null	null	null	null	null	null	Primary Tumor	notreported	25772	dead	null	162.0	null	null	null	null	71d077da-767c-583f-8db6-5fad0f0fbf32	c71.0	notreported	-25772	notreported	notreported
GBM	c71.9	female	notreported	nothispanicorlatino	white	GBM_unc.edu.23c2c2d5-d035-4875-a109-aa0a4c34c20e.1544484.rsem.isoforms.results	edcfac32-adb4-4fe7-86a0-309d3c6430e5	c71.9	1970	null	null	null	null	null	null	null	Primary Tumor	notreported	13451	dead	null	448.0	null	439.0	null	null	de5a2455-b178-5b03-bf18-69eea4de3d5c	c71.9	notreported	-13451	notreported	notreported
OV	c48.1	female	notreported	notreported	blackorafricanamerican	OV_unc.edu.ea715147-2b94-4bed-9531-ba91c13630fe.2704837.rsem.isoforms.results	f1cb3d48-1415-408d-89d1-dfdcc5924963	c48.1	1945	null	null	null	null	null	null	null	Primary Tumor	notreported	24161	dead	null	1088.0	null	984.0	null	null	ac1e9d43-af66-5f28-8eff-48495da484b3	c48.1	notreported	-24161	notreported	notreported
LGG	c71.0	male	notreported	nothispanicorlatino	blackorafricanamerican	LGG_unc.edu.b675a1c5-e16c-427d-9c47-1b75e8e51f4d.1671378.rsem.isoforms.results	275cb949-2f61-48c9-84f0-ba8ae4fa35c4	c71.0	1973	null	null	null	null	null	null	null	Primary Tumor	notreported	14171	alive	null	null	null	1079.0	null	null	bbf20a7b-429b-5218-9523-cd81fb3216b9	c71.0	notreported	-14171	notreported	notreported
BLCA	c67.4	female	stageiii	nothispanicorlatino	white	BLCA_unc.edu.6d466393-6b0c-4624-b385-5d689695de6b.2659265.rsem.isoforms.results	aa14e232-c6c6-4075-9d15-e1857373d233	c67.4	1933	3.287671232876712	66.0	null	null	0.0022837370242214535	null	170.0	Primary Tumor	notreported	27309	dead	null	118.0	null	null	null	null	0783e6b4-8ee7-5966-82ab-1a479111a16a	c67.4	notreported	-27309	notreported	notreported
OV	c56.9	female	notreported	notreported	white	OV_unc.edu.0f5f479c-c83b-404b-bd17-ebb2aa5b0dc8.1551962.rsem.isoforms.results	499a9b57-ee1a-4012-bbab-c6ad955b5e0a	c56.9	1944	null	null	null	null	null	null	null	Primary Tumor	notreported	19661	dead	null	1579.0	null	1579.0	null	null	d6ee4cbf-9c84-5fef-bb8e-d5df71a1e6f7	c56.9	notreported	-19661	notreported	notreported
THCA	c73	male	stagei	nothispanicorlatino	white	THCA_unc.edu.12c5149b-7fd8-4031-9d10-f8efc6247726.1248080.rsem.isoforms.results	8877b479-b62a-4794-b71e-418de96dff23	c73.9	1974	null	null	null	null	null	null	null	Primary Tumor	notreported	13149	alive	null	null	null	1280.0	null	null	6a0a2afc-0656-54e3-b783-96a558bd02c9	c73.9	notreported	-13149	notreported	notreported
LGG	c71.9	male	notreported	nothispanicorlatino	white	LGG_unc.edu.468e10c6-3ce9-4334-97d4-55d91799daf9.1410993.rsem.isoforms.results	837b51d0-e6b7-431b-a5f3-7615bdf12b67	c71.9	1957	null	null	null	null	null	null	null	Primary Tumor	notreported	15230	dead	null	1525.0	null	null	null	null	262a76c3-4ca9-5741-a683-d32c7e6ea241	c71.9	notreported	-15230	notreported	notreported
OV	c56.9	female	notreported	notreported	white	OV_unc.edu.7b6fe6e3-145b-46e6-884e-fcec23514674.1532920.rsem.isoforms.results	cd6e5d3d-1c86-40dd-9cb3-b2e2075dec56	c56.9	1937	null	null	null	null	null	null	null	Primary Tumor	notreported	25937	alive	null	null	null	277.0	null	null	c35644a3-29fa-58ef-96eb-39833b3fd41f	c56.9	notreported	-25937	notreported	notreported
THCA	c73	male	stageiii	nothispanicorlatino	white	THCA_unc.edu.0f785f8d-8c49-4940-9c60-31ad29c844d5.1239036.rsem.isoforms.results	0fe3b19a-f5e4-497e-92da-32ff6c77b066	c73.9	1952	null	null	null	null	null	null	null	Primary Tumor	notreported	21369	alive	null	null	null	448.0	null	null	57423023-904b-56bd-b5d0-9554874d06be	c73.9	notreported	-21369	notreported	notreported
BLCA	c67.2	male	stageii	nothispanicorlatino	white	BLCA_unc.edu.3cefcb0b-796f-4ef0-b50d-a6ed17e9be4d.1179721.rsem.isoforms.results	4dc5cffe-ed8c-47ab-b5fc-f9615b5414f7	c67.2	1938	null	null	null	null	null	null	null	Primary Tumor	notreported	26078	dead	null	254.0	null	null	null	null	1a57505d-1a54-5aad-a8ff-dbd1955dd062	c67.2	notreported	-26078	notreported	notreported
OV	c56.9	female	notreported	nothispanicorlatino	white	OV_unc.edu.7e58cfd1-07eb-44e2-a563-fa7a00b338a3.1532605.rsem.isoforms.results	16829472-5666-4fba-9bf9-360ec1689aa0	c56.9	1948	null	null	null	null	null	null	null	Primary Tumor	notreported	null	alive	null	null	null	3532.0	null	null	9e178568-ef7f-5e7a-b7af-7397c47741bb	c56.9	notreported	null	notreported	notreported
OV	c56.9	female	notreported	nothispanicorlatino	white	OV_unc.edu.cd93531b-4d92-4be3-95e5-032636dd1ad8.1518337.rsem.isoforms.results	390eed6b-50af-48a9-9fd6-3a68a2bbb7f9	c56.9	1956	null	null	null	null	null	null	null	Primary Tumor	notreported	19087	alive	null	null	null	2661.0	null	null	876d6193-704f-5a99-a4cc-eff9b4e4f2d5	c56.9	notreported	-19087	notreported	notreported
BLCA	c67.0	female	stageiii	nothispanicorlatino	white	BLCA_unc.edu.20f18a89-bca9-4f97-98c5-7b58a4444823.1179405.rsem.isoforms.results	83b41d35-69b1-4218-be1a-8821d8a6899c	c67.0	1938	null	null	null	null	null	null	null	Solid Tissue Normal	notreported	25761	dead	null	455.0	null	null	null	null	5f53d094-88aa-5c69-abd6-bad079955707	c67.0	notreported	-25761	notreported	notreported
BLCA	c67.9	male	stageii	nothispanicorlatino	white	BLCA_unc.edu.73220a3d-e4e3-4494-a832-86baa98333b4.1783988.rsem.isoforms.results	10422fe9-8d70-40a9-9875-3fe9fab68823	c67.9	1935	1.643835616438356	82.0	null	null	0.0025308641975308644	null	180.0	Primary Tumor	notreported	28204	alive	null	null	null	580.0	null	null	9462cd0e-5e22-5e62-8178-6d9de4e39b38	c67.9	notreported	-28204	notreported	notreported
LGG	c71.0	female	notreported	nothispanicorlatino	white	LGG_unc.edu.2550796d-132e-4387-a730-b7fb2e1ee16e.2331633.rsem.isoforms.results	f6a81d81-7df4-4273-8a86-e0cd3b8b1df5	c71.0	1971	null	null	null	null	null	null	null	Primary Tumor	notreported	12402	dead	null	241.0	null	null	null	null	895b07a6-6300-5c34-8012-efcdc514a943	c71.0	notreported	-12402	notreported	notreported
LGG	c71.0	male	notreported	nothispanicorlatino	white	LGG_unc.edu.0836116d-5b2e-4445-9019-a5c5ad7aac50.2325011.rsem.isoforms.results	dd85dbb2-31c3-4bc2-9dff-3bd27c79a9ad	c71.0	1953	null	null	null	null	null	null	null	Primary Tumor	notreported	19223	alive	null	null	null	3761.0	null	null	bab65044-f85c-56d4-a50b-02e0744b68ee	c71.0	notreported	-19223	notreported	notreported
LGG	c71.0	female	notreported	nothispanicorlatino	white	LGG_unc.edu.0c53d4ad-c5b9-4bdc-8154-99cf0b715dd5.2278257.rsem.isoforms.results	49d5acbb-d75c-4485-b456-6b50667fef99	c71.0	1942	null	null	null	null	null	null	null	Primary Tumor	notreported	26002	alive	null	null	null	7.0	null	null	75ceac9b-2d63-569f-87a3-a7764f2e90df	c71.0	notreported	-26002	notreported	notreported
OV	c56.9	female	notreported	nothispanicorlatino	white	OV_unc.edu.690d1437-2a05-4263-8fa7-8f4481893b83.1549092.rsem.isoforms.results	4a2ca7b8-729d-4fab-a6f3-a5d1e5d1f4f3	c56.9	1943	null	null	null	null	null	null	null	Primary Tumor	notreported	22344	dead	null	914.0	null	914.0	null	null	dcbdfdd3-dfe8-51f7-969c-02ea3474bc0a	c56.9	notreported	-22344	notreported	notreported
BLCA	c67.9	female	stageiv	nothispanicorlatino	white	BLCA_unc.edu.72dcc6a3-c2ce-4e24-897d-880a0f01c1aa.2651251.rsem.isoforms.results	ada95115-275f-4229-aa00-f298a5ff931c	c67.9	1931	0.547945205479452	60.0	null	null	0.00234375	null	160.0	Primary Tumor	notreported	27397	dead	null	90.0	null	null	null	null	19210462-2a67-589c-943d-a96ff667f2a5	c67.9	notreported	-27397	notreported	notreported
THCA	c73	female	stageii	nothispanicorlatino	white	THCA_unc.edu.0931e34f-0ec0-41a7-bd0c-e1c4824c92ad.1858576.rsem.isoforms.results	cc84500c-0196-450d-87a1-ca394cc227b5	c73.9	1961	null	null	null	null	null	null	null	Primary Tumor	notreported	18938	alive	null	null	null	714.0	null	null	8e549670-95c7-59f7-b239-a7b34ec62de6	c73.9	notreported	-18938	notreported	notreported
LGG	c71.0	male	notreported	notreported	white	LGG_unc.edu.48ffe5e4-5aec-41fd-8b5f-78466a593eef.2443404.rsem.isoforms.results	cb041720-0efa-4eb6-a9a5-b6e138bb1a99	c71.0	1986	null	null	null	null	null	null	null	Primary Tumor	notreported	8817	alive	null	null	null	1393.0	null	null	dff29de8-bb76-50b0-aa02-43c4c702de4e	c71.0	notreported	-8817	notreported	notreported
BLCA	c67.2	male	stageiv	nothispanicorlatino	white	BLCA_unc.edu.42db28fc-4d5f-4b0f-aa86-7d27197c7649.1386199.rsem.isoforms.results	3f0a0748-9acc-4d0b-ba18-7c08bd183f86	c67.2	1924	null	91.2	null	null	0.002664718772826881	null	185.0	Primary Tumor	notreported	32076	dead	null	146.0	null	67.0	null	null	cb628374-ca8a-5a78-b5c5-ed7e7199d663	c67.2	notreported	-32076	notreported	notreported
BLCA	c67.2	male	stageiv	nothispanicorlatino	white	BLCA_unc.edu.088b27e8-38f6-41ff-a861-d371415fd7f0.2233138.rsem.isoforms.results	0c890030-9bdb-4247-a3d5-a004f992f99c	c67.2	1940	0.547945205479452	76.0	null	null	0.00251023913330691	null	174.0	Primary Tumor	notreported	26893	dead	null	93.0	null	81.0	null	null	823101aa-82c2-5029-b013-8d883fe3669f	c67.2	notreported	-26893	notreported	notreported
THCA	c73	male	stagei	nothispanicorlatino	white	THCA_unc.edu.6b4ceb7e-f81c-44f2-a0d5-ae92f79c1378.1365960.rsem.isoforms.results	d2512fd6-9042-4a62-8b49-d483cb84b89d	c73.9	1967	null	null	null	null	null	null	null	Primary Tumor	notreported	14295	alive	null	null	null	3059.0	null	null	5053b211-2f02-5e6e-ba1b-c699d4ae8d9d	c73.9	notreported	-14295	notreported	notreported
BLCA	c67.3	male	stageiii	nothispanicorlatino	white	BLCA_unc.edu.417805b3-9c10-4724-ab87-480c773f7d16.2511511.rsem.isoforms.results	9ef9e328-ac74-4c8a-9990-347b87cf7764	c67.3	null	null	68.0	null	null	0.002272043837081092	null	173.0	Primary Tumor	notreported	29565	alive	null	null	null	542.0	null	null	fcc234ed-eb67-56a9-81c5-52237a779c56	c67.3	notreported	-29565	notreported	notreported
BLCA	c67.9	female	stageiii	nothispanicorlatino	white	BLCA_unc.edu.cbc184c2-4bda-4a56-9b49-453f503e16ab.2640913.rsem.isoforms.results	6ee18b9a-3f45-491f-9535-502820cfcf46	c67.9	1920	null	72.0	null	null	0.002921010994360826	null	157.0	Primary Tumor	notreported	32207	alive	null	null	null	64.0	null	null	5286fa32-d0ab-5107-93c5-8ae61f89488e	c67.9	notreported	-32207	notreported	notreported
THCA	c73	female	stageiii	nothispanicorlatino	white	THCA_unc.edu.2f59cbc7-724a-48d3-b02f-8dedc49833fd.1661722.rsem.isoforms.results	52203ff5-57b2-4d56-8935-2ff1eb61d7b8	c73.9	1947	null	null	null	null	null	null	null	Primary Tumor	notreported	23654	alive	null	null	null	238.0	null	null	c1061d99-1f70-5355-ad54-65fdff036738	c73.9	notreported	-23654	notreported	notreported
BLCA	c67.9	male	stageiv	nothispanicorlatino	white	BLCA_unc.edu.81018f98-fee6-4cde-b6f6-3b6254e3e8d7.1928120.rsem.isoforms.results	ff5b9238-38a7-42b4-9d44-3b8ec9913f6d	c67.9	1940	2.0821917808219177	80.0	null	null	0.00238884409806205	null	183.0	Primary Tumor	notreported	26546	dead	null	332.0	null	195.0	null	null	214dd7fe-05b5-5d8a-9eef-ae869d75aae7	c67.9	notreported	-26546	notreported	notreported
LGG	c71.0	female	notreported	nothispanicorlatino	white	LGG_unc.edu.af6191bb-b4c3-42ea-adc9-f6d45b00f0b0.2412498.rsem.isoforms.results	c0d47e0f-4918-4e06-9db6-201671b1259c	c71.0	1976	null	null	null	null	null	null	null	Recurrent Tumor	notreported	9021	dead	null	4068.0	null	null	null	null	9e2c8f99-8d0f-5304-95a5-ae41e113650c	c71.0	notreported	-9021	notreported	notreported
BLCA	c67.4	male	stageiii	nothispanicorlatino	white	BLCA_unc.edu.ea9d4bd8-1f4e-4ad5-81f7-803b078f2603.1468923.rsem.isoforms.results	06f936e9-5a90-40d3-b91a-713f2b4e6e11	c67.4	1964	1.917808219178082	77.0	null	null	0.0026643598615916954	null	170.0	Primary Tumor	notreported	17383	alive	null	null	null	1110.0	null	null	a9e3548e-d221-5808-a9be-e82e157a5853	c67.4	notreported	-17383	notreported	notreported
LGG	c71.0	male	notreported	nothispanicorlatino	white	LGG_unc.edu.8e2c16f2-38cc-49ad-adca-dbe5f4e0bf7f.2271727.rsem.isoforms.results	395798c5-3136-4a30-8557-a67a3abdecaf	c71.0	1946	null	null	null	null	null	null	null	Primary Tumor	notreported	19823	dead	null	814.0	null	null	null	null	8b24cb25-76af-5155-ac3a-4107f5f9465f	c71.0	notreported	-19823	notreported	notreported
GBM	c71.9	female	notreported	nothispanicorlatino	blackorafricanamerican	GBM_unc.edu.acb1160e-036a-4108-a9ce-d5f954191593.1538765.rsem.isoforms.results	66f3c936-272e-4a1e-8567-f609af411329	c71.9	1934	null	null	null	null	null	null	null	Primary Tumor	notreported	26796	dead	null	64.0	null	62.0	null	null	68c1afbd-a477-590d-8e7b-bb1be670e2c2	c71.9	notreported	-26796	notreported	notreported
LGG	c71.0	female	notreported	nothispanicorlatino	blackorafricanamerican	LGG_unc.edu.fad69aee-febe-4893-86a4-e71c0b22b9f4.1815831.rsem.isoforms.results	9e621541-d603-4d2d-b86e-2834d3b9f9a5	c71.0	1957	null	null	null	null	null	null	null	Primary Tumor	notreported	18173	alive	null	null	null	900.0	null	null	42ff40b7-474f-5fa1-87b3-654900d80b02	c71.0	notreported	-18173	notreported	notreported
OV	c56.9	female	notreported	notreported	white	OV_unc.edu.e0667b02-b4cf-43e7-8cd7-b9fd11b3cec6.1520001.rsem.isoforms.results	1db60f09-7f5a-4f21-8003-06a6abc781db	c56.9	1957	null	null	null	null	null	null	null	Primary Tumor	notreported	16523	dead	null	1187.0	null	null	null	null	8c0fa4a4-95b4-5ff6-aa24-077fd12ff564	c56.9	notreported	-16523	notreported	notreported
THCA	c73	female	stagei	nothispanicorlatino	white	THCA_unc.edu.a57ebf88-f20e-4ae7-83c6-810ef72b99ba.1651339.rsem.isoforms.results	a86ac3b5-b5e9-4420-8de0-a358fcad85b6	c73.9	1969	null	null	null	null	null	null	null	Primary Tumor	notreported	13817	alive	null	null	null	2606.0	null	null	8b325eea-a774-5dbe-832d-c9d0faf10e80	c73.9	notreported	-13817	notreported	notreported
LGG	c71.0	female	notreported	nothispanicorlatino	blackorafricanamerican	LGG_unc.edu.796ff6a5-e27c-4e86-8ac3-7aa29d3b6bd8.1569216.rsem.isoforms.results	292cf158-dd47-44a1-912b-73626095a0f7	c71.0	1968	null	null	null	null	null	null	null	Primary Tumor	notreported	14205	dead	null	576.0	null	null	null	null	d36c239d-dfad-59ba-8ecf-6419b282f165	c71.0	notreported	-14205	notreported	notreported
THCA	c73	female	stagei	nothispanicorlatino	white	THCA_unc.edu.840ab30a-7bd1-4b9c-b098-86a8117182bd.1662099.rsem.isoforms.results	d92902ff-8023-411c-a7ca-1afcbb64937e	c73.9	1945	null	null	null	null	null	null	null	Primary Tumor	notreported	24215	alive	null	null	null	504.0	null	null	2c1a72f0-47ec-5bfc-88f7-df9dfa6c06a9	c73.9	notreported	-24215	notreported	notreported
LGG	c71.0	female	notreported	nothispanicorlatino	white	LGG_unc.edu.f5bb6d6f-70b2-495b-9638-2527ba6b8aa1.2309656.rsem.isoforms.results	033c1f48-9225-4159-b23b-7042272877da	c71.0	1968	null	null	null	null	null	null	null	Recurrent Tumor	notreported	15178	alive	null	null	null	1989.0	null	null	9b887204-7b60-581e-8e43-b6b20460f907	c71.0	notreported	-15178	notreported	notreported
BLCA	c67.9	female	stageiv	nothispanicorlatino	white	BLCA_unc.edu.0cb1b6e8-1a05-472d-9651-126f92d17e73.2504159.rsem.isoforms.results	42bcf1a7-2f3a-4ed8-a41d-cdd67e65b928	c67.9	1932	1.643835616438356	56.0	null	null	0.0024560326301478006	null	151.0	Primary Tumor	notreported	27068	dead	null	182.0	null	null	null	null	d2a0e01e-86e0-5f8c-9631-937aadf13a11	c67.9	notreported	-27068	notreported	notreported
LGG	c71.0	female	notreported	notreported	notreported	LGG_unc.edu.ea214bab-dd3f-4594-9c93-e60fa586b3a4.2408292.rsem.isoforms.results	50975570-c0d5-4ee7-9226-40b3db1bde84	c71.0	1974	null	null	null	null	null	null	null	Primary Tumor	notreported	13663	alive	null	null	null	1314.0	null	null	163ebc48-6cda-51e4-968f-4c1b80c1b340	c71.0	notreported	-13663	notreported	notreported
OV	c48.1	female	notreported	notreported	white	OV_unc.edu.d554a1f1-3e8a-4b8c-a458-36e6550905dd.2723176.rsem.isoforms.results	bdd792e7-d75f-4aa3-b38e-f0708e112075	c48.1	1948	null	null	null	null	null	null	null	Primary Tumor	notreported	17235	dead	null	506.0	null	506.0	null	null	9b15e2a6-35c6-5b7c-a120-c89694cdd36a	c48.1	notreported	-17235	notreported	notreported
LGG	c71.0	male	notreported	nothispanicorlatino	white	LGG_unc.edu.caba02b8-ffcf-440f-ab03-6141aa19752f.2309048.rsem.isoforms.results	cf29547a-305b-4e6e-8342-36aac0850065	c71.0	1947	null	null	null	null	null	null	null	Primary Tumor	notreported	24252	dead	null	372.0	null	-1.0	null	null	e7b71d8f-71ae-52e0-b759-4b8ee78138d8	c71.0	notreported	-24252	notreported	notreported
THCA	c73	male	stageii	nothispanicorlatino	white	THCA_unc.edu.f837995e-48a9-46b4-bf57-0dd6f3086046.1328564.rsem.isoforms.results	59e91fe5-c80f-4915-be0f-1a7cd3f31f3e	c73.9	1931	null	null	null	null	null	null	null	Primary Tumor	notreported	29143	alive	null	null	null	640.0	null	null	403216d6-0c26-512c-a3f2-35541ad241e2	c73.9	notreported	-29143	notreported	notreported
THCA	c73	female	stagei	nothispanicorlatino	white	THCA_unc.edu.6b0283fd-2875-43ab-9fc0-860ed691c5a3.1656473.rsem.isoforms.results	a253b21e-ba9b-4928-95d1-89b59c868794	c73.9	1986	null	null	null	null	null	null	null	Solid Tissue Normal	notreported	8076	alive	null	null	null	215.0	null	null	e8dc11d9-202f-5ed6-b442-f9f35c96c70e	c73.9	notreported	-8076	notreported	notreported
THCA	c73	male	stageiii	nothispanicorlatino	white	THCA_unc.edu.bf6b3b00-4934-4662-a078-60dfa7a9e1fc.1857956.rsem.isoforms.results	1009a500-2a37-4aee-b7c3-049b5ce961a4	c73.9	1965	null	null	null	null	null	null	null	Primary Tumor	notreported	17430	alive	null	null	null	591.0	null	null	1db37f8c-4ce1-5b5a-ab02-7f937a75669e	c73.9	notreported	-17430	notreported	notreported
LGG	c71.0	male	notreported	notreported	white	LGG_unc.edu.5a4d2d74-6bf6-455c-87ad-5b51725bd04f.2443440.rsem.isoforms.results	f62be2b8-88c4-4a7e-8c80-8176fb5f6c56	c71.0	1974	null	null	null	null	null	null	null	Primary Tumor	notreported	13506	alive	null	null	null	1426.0	null	null	d9574e58-04c1-51cd-8460-ba3db1af8245	c71.0	notreported	-13506	notreported	notreported
THCA	c73	male	stagei	hispanicorlatino	white	THCA_unc.edu.dcbfdc62-310c-48e0-bb03-f32a657b210a.1329224.rsem.isoforms.results	8a02f305-6fd8-4908-bc19-06babf028b5b	c73.9	1986	null	null	null	null	null	null	null	Primary Tumor	notreported	8791	alive	null	null	null	1596.0	null	null	799b6031-25ff-5d91-94f7-62446a2c030c	c73.9	notreported	-8791	notreported	notreported
GBM	c71.9	male	notreported	nothispanicorlatino	white	GBM_unc.edu.b147bdcd-f5b6-41be-bca4-3ef7efcb9ec6.1540685.rsem.isoforms.results	713190ed-c6c1-4695-814b-85ca9b95e6a0	c71.9	1950	null	null	null	null	null	null	null	Primary Tumor	notreported	22213	alive	null	null	null	260.0	null	null	aaf8655a-390c-584a-b0cf-796816619d14	c71.9	notreported	-22213	notreported	notreported
BLCA	c67.2	male	stageiii	nothispanicorlatino	asian	BLCA_unc.edu.d68e2da7-7bd4-4510-8751-02e9f16ad4e6.2095253.rsem.isoforms.results	b7439edc-b7ab-407e-810a-c60864a915bf	c67.2	1943	0.547945205479452	84.0	null	null	0.00253592561284869	null	182.0	Primary Tumor	notreported	25297	alive	null	null	null	82.0	null	null	6935f9c2-f4aa-500a-b567-ab4d54bf265d	c67.2	notreported	-25297	notreported	notreported
THCA	c73	male	stageiii	notreported	notreported	THCA_unc.edu.47855530-fdf4-4ab1-8387-f77db6b19e78.1903372.rsem.isoforms.results	4729410a-7240-4ed0-b478-78cc6c7a4810	c73.9	1942	null	null	null	null	null	null	null	Primary Tumor	notreported	25500	alive	null	null	null	892.0	null	null	a132278c-604c-5095-a885-34b1b9345799	c73.9	notreported	-25500	notreported	notreported
OV	c56.9	female	notreported	nothispanicorlatino	white	OV_unc.edu.044d949f-0eb4-44c9-8327-90226936fc7c.1552348.rsem.isoforms.results	29dccd25-4c4a-463b-a353-38a193337f38	c56.9	1959	null	null	null	null	null	null	null	Primary Tumor	notreported	18218	dead	null	868.0	null	224.0	null	null	84bc8778-a967-5764-8dc6-e7fb3efed07f	c56.9	notreported	-18218	notreported	notreported
LGG	c71.0	male	notreported	nothispanicorlatino	white	LGG_unc.edu.2dc97660-d26f-49a4-9e47-3678a3768724.2443579.rsem.isoforms.results	1f2f3bf6-acdd-4a72-8c33-230de40910eb	c71.0	1982	null	null	null	null	null	null	null	Primary Tumor	notreported	11083	alive	null	null	null	63.0	null	null	8825b4b7-3b99-5ae9-8f86-5ee0309ae4b3	c71.0	notreported	-11083	notreported	notreported
LGG	c71.9	female	notreported	nothispanicorlatino	white	LGG_unc.edu.b168cb27-2676-40ed-9743-5046d5b0eb8c.2222571.rsem.isoforms.results	505e9812-d13e-42d3-aee2-55a85d6f4551	c71.9	1975	null	null	null	null	null	null	null	Primary Tumor	notreported	14073	alive	null	null	null	461.0	null	null	b6a5c58e-e2e2-54c8-8daa-4f97f76d2169	c71.9	notreported	-14073	notreported	notreported
GBM	c71.9	male	notreported	nothispanicorlatino	white	GBM_unc.edu.d694ad12-0ae4-4bee-9f7f-0c6adf5bf09d.1538283.rsem.isoforms.results	ea82c1da-eada-4108-80ec-77ce891d82a7	c71.9	1947	null	null	null	null	null	null	null	Primary Tumor	notreported	22273	dead	null	175.0	null	136.0	null	null	4ac2db46-2b0b-538a-aca6-88f0acd0427b	c71.9	notreported	-22273	notreported	notreported
THCA	c73	female	stageiii	nothispanicorlatino	white	THCA_unc.edu.deca26c0-d474-4a76-9a60-d49954ce1b68.1918829.rsem.isoforms.results	aa6e3437-ea1c-4bed-ab7d-8f3f89f8ceeb	c73.9	1942	null	null	null	null	null	null	null	Primary Tumor	notreported	24846	alive	null	null	null	1046.0	null	null	7d03d1fe-858f-55c5-bdb4-f0f19debf4cd	c73.9	notreported	-24846	notreported	notreported
THCA	c73	female	stagei	hispanicorlatino	white	THCA_unc.edu.4c4f8d6d-77a1-42fd-8671-d2651136d5f6.1326645.rsem.isoforms.results	d2a8035c-a8d3-4038-8a9d-854f2208bc45	c73.9	1950	null	null	null	null	null	null	null	Primary Tumor	notreported	21278	alive	null	null	null	1442.0	null	null	5f2db943-4037-5442-a225-9f202c1cc8ec	c73.9	notreported	-21278	notreported	notreported
LGG	c71.0	female	notreported	nothispanicorlatino	white	LGG_unc.edu.a8be2bbb-f0a6-40e6-af7a-ee9289e8ad44.2056216.rsem.isoforms.results	a85aebda-b182-41ba-815a-3ff055e22829	c71.0	1978	null	null	null	null	null	null	null	Primary Tumor	notreported	12445	alive	null	null	null	542.0	null	null	0d3595c6-5d8c-5e47-b397-7d479df56185	c71.0	notreported	-12445	notreported	notreported
BLCA	c67.9	female	stageii	nothispanicorlatino	asian	BLCA_unc.edu.1e640951-76e2-4691-bfda-301e6bd11c47.2494328.rsem.isoforms.results	b838a4db-ef0a-4d88-a220-bf57e31e0b3c	c67.9	1940	null	54.0	null	null	0.0023372576177285317	null	152.0	Primary Tumor	notreported	24060	dead	null	1971.0	null	null	null	null	6c2556c1-284a-541c-ba7f-20e628b14537	c67.9	notreported	-24060	notreported	notreported
THCA	c73	female	stagei	nothispanicorlatino	asian	THCA_unc.edu.c801b113-11ce-4edd-bc44-48dd19d00791.1816858.rsem.isoforms.results	e62a728d-390f-428a-bea1-fc8c9814fb11	c73.9	1975	null	null	null	null	null	null	null	Primary Tumor	notreported	13815	alive	null	null	null	378.0	null	null	fd1714aa-d0d1-5e7a-a6ed-c125df6d2f89	c73.9	notreported	-13815	notreported	notreported
BLCA	c67.9	male	stageiii	nothispanicorlatino	white	BLCA_unc.edu.a09bfd63-c31c-461a-b5a4-60670f421233.1352305.rsem.isoforms.results	41b59716-116f-4942-8b63-409870a87e26	c67.9	1935	0.4383561643835616	92.1	null	null	0.0030211420901186023	null	174.6	Primary Tumor	notreported	28106	dead	null	248.0	null	238.0	null	null	4f167eca-aeef-5c7b-b0af-22772ab5efb9	c67.9	notreported	-28106	notreported	notreported
LGG	c71.0	female	notreported	nothispanicorlatino	white	LGG_unc.edu.7e4fcbe3-07e2-4f26-8a7d-5655d0be0f6a.2269516.rsem.isoforms.results	3c6dc0eb-e94b-4293-b665-f3cba04fc8de	c71.0	1979	null	null	null	null	null	null	null	Primary Tumor	notreported	12757	alive	null	null	null	134.0	null	null	083506e3-2d9c-54be-a069-460b172de1ce	c71.0	notreported	-12757	notreported	notreported
OV	c56.9	female	notreported	nothispanicorlatino	white	OV_unc.edu.71543abc-9f15-48d9-994d-e7b963a4d8f3.1549336.rsem.isoforms.results	60cce7ac-d27d-44a6-9873-ecf91da5e906	c56.9	1939	null	null	null	null	null	null	null	Primary Tumor	notreported	21552	dead	null	1018.0	null	null	null	null	394df501-4b80-527f-91ba-621c945330b6	c56.9	notreported	-21552	notreported	notreported
THCA	c73	male	stagei	nothispanicorlatino	white	THCA_unc.edu.6a279cfe-e09e-4508-95aa-1f2f51a82bf8.1258815.rsem.isoforms.results	cb29e795-7618-4882-a7e0-69d39787b80c	c73.9	1948	null	null	null	null	null	null	null	Primary Tumor	notreported	22859	alive	null	null	null	1368.0	null	null	6dfdfe74-8e88-523d-a23a-d524bb66dba2	c73.9	notreported	-22859	notreported	notreported
THCA	c73	female	stagei	notreported	notreported	THCA_unc.edu.47039a8f-de54-4ff9-84e2-6c1cdcd97dc0.1212593.rsem.isoforms.results	2f59f12d-ca0c-4ac6-9718-98a6d455af46	c73.9	1985	null	null	null	null	null	null	null	Primary Tumor	notreported	9759	alive	null	null	null	91.0	null	null	34086029-ce6f-5974-9689-51e2e96f90f2	c73.9	notreported	-9759	notreported	notreported
BLCA	c67.9	male	stageiii	nothispanicorlatino	white	BLCA_unc.edu.378c51fa-27d3-4e70-a471-9f1006513d24.2651166.rsem.isoforms.results	33708951-0a0d-4ad0-b472-23151c9f76f6	c67.9	1937	3.287671232876712	101.0	null	null	0.0031877288221184193	null	178.0	Primary Tumor	notreported	25080	dead	null	128.0	null	null	null	null	346ae698-d036-5cad-a0a6-3c144376398d	c67.9	notreported	-25080	notreported	notreported
THCA	c73	female	stagei	notreported	notreported	THCA_unc.edu.73d37bb3-e8d4-4347-9221-e79b0186d940.1903599.rsem.isoforms.results	b7bafe7f-295c-4598-9cc8-49d785bd2218	c73.9	1966	null	null	null	null	null	null	null	Primary Tumor	notreported	14796	alive	null	null	null	2573.0	null	null	739a9105-a3d9-54b6-b6ff-1cecf9c9c4bf	c73.9	notreported	-14796	notreported	notreported
THCA	c73	female	stageiii	nothispanicorlatino	white	THCA_unc.edu.7473f4ae-a2b7-4be3-99ca-560d93fc793d.1361728.rsem.isoforms.results	011ae7b8-5003-4fcd-9f20-906a723f2c66	c73.9	1913	null	null	null	null	null	null	null	Primary Tumor	notreported	31934	dead	null	1734.0	null	null	null	null	88bc3cb0-9269-5852-8cff-031116f774fe	c73.9	notreported	-31934	notreported	notreported
BLCA	c67.3	male	stageiv	nothispanicorlatino	white	BLCA_unc.edu.22e154de-0e3b-443b-8420-48d68d6c1ce4.1179392.rsem.isoforms.results	096b4f32-10c1-4737-a0dd-cae04c54ee33	c67.3	1944	null	null	null	null	null	null	null	Primary Tumor	notreported	23220	dead	null	453.0	null	null	null	null	69f0c76e-6297-5ea9-b271-f999d1e37aa9	c67.3	notreported	-23220	notreported	notreported
OV	c56.9	female	notreported	nothispanicorlatino	white	OV_unc.edu.9ba8d6bf-1541-4127-bc60-73091d2d81c7.1523480.rsem.isoforms.results	79fd602b-3e8e-4353-aa78-4f5f170b607d	c56.9	1963	null	null	null	null	null	null	null	Primary Tumor	notreported	13911	dead	null	2009.0	null	1979.0	null	null	b7fddc9e-b9ea-58bc-8db5-3e808b1953a1	c56.9	notreported	-13911	notreported	notreported
THCA	c73	male	stageiii	nothispanicorlatino	white	THCA_unc.edu.7168b8b4-be72-48aa-942c-0e72ca68926c.1383672.rsem.isoforms.results	d487536f-0521-4d42-9150-6a806ae00241	c73.9	1946	null	null	null	null	null	null	null	Primary Tumor	notreported	23987	alive	null	null	null	1060.0	null	null	6072cc9b-8fa9-50ec-9982-0229fbbaae48	c73.9	notreported	-23987	notreported	notreported
THCA	c73	male	stagei	nothispanicorlatino	white	THCA_unc.edu.e80f8c3a-d7ae-4ea5-b39b-0318c7c0b3bd.1368238.rsem.isoforms.results	ab17d69e-0078-4206-939e-e4784fdc9a96	c73.9	1972	null	null	null	null	null	null	null	Primary Tumor	notreported	10423	alive	null	null	null	127.0	null	null	da8d28c9-4b01-52f6-be07-2569c3ca3838	c73.9	notreported	-10423	notreported	notreported
LGG	c71.0	male	notreported	nothispanicorlatino	white	LGG_unc.edu.aa0da5cf-b997-4e3e-83eb-b01e7488b714.2350921.rsem.isoforms.results	5a3ef1cb-c98e-473a-b097-20307b04bc1b	c71.0	1979	null	null	null	null	null	null	null	Primary Tumor	notreported	11884	alive	null	null	null	1137.0	null	null	4ac939a4-69c1-509a-a169-577bb59a9cff	c71.0	notreported	-11884	notreported	notreported
LGG	c71.2	female	notreported	nothispanicorlatino	white	LGG_unc.edu.a622534d-0108-4890-a0c5-4d1e12c25e44.1981504.rsem.isoforms.results	1701f4ad-58c5-40d8-90c4-99e3acac0104	c71.2	1984	null	null	null	null	null	null	null	Primary Tumor	notreported	10150	alive	null	null	null	1139.0	null	null	917e377f-02f9-5fa9-bb6d-7bf1674f5d89	c71.2	notreported	-10150	notreported	notreported
THCA	c73	female	stageii	notreported	notreported	THCA_unc.edu.f94f2b3a-4dc6-4fd2-9945-6ddd721b5d30.1663344.rsem.isoforms.results	398d5c2e-f877-4bbf-a10c-486b8523c9ce	c73.9	1957	null	null	null	null	null	null	null	Primary Tumor	notreported	19856	alive	null	null	null	458.0	null	null	5682ea81-9cfa-59d0-b948-3a72526c3917	c73.9	notreported	-19856	notreported	notreported
THCA	c73	female	stagei	nothispanicorlatino	white	THCA_unc.edu.aa9d8e32-4e9d-409f-81b0-9c6e2b6af130.1927098.rsem.isoforms.results	dd305533-e48c-4fed-9283-5082703c23ff	c73.9	1953	null	null	null	null	null	null	null	Primary Tumor	notreported	21713	alive	null	null	null	105.0	null	null	86131bae-3158-57db-bcf0-725c4c71011a	c73.9	notreported	-21713	notreported	notreported
LGG	c71.0	female	notreported	nothispanicorlatino	white	LGG_unc.edu.72721695-e7f3-48c8-82a1-84156e174cad.1566699.rsem.isoforms.results	834e560a-a506-456d-baf2-a206ca058153	c71.0	1943	null	null	null	null	null	null	null	Primary Tumor	notreported	21199	dead	null	456.0	null	null	null	null	f21ba104-bc35-54d0-b0fa-a08e658cec34	c71.0	notreported	-21199	notreported	notreported
GBM	c71.9	male	notreported	nothispanicorlatino	white	GBM_unc.edu.6b59b1e5-4593-49f9-add7-b41e719d7af6.1541320.rsem.isoforms.results	5c984433-33cf-42fc-b3ba-511efcdcab19	c71.9	1950	null	null	null	null	null	null	null	Primary Tumor	notreported	17515	dead	null	360.0	null	360.0	null	null	cec1bfa2-94cf-5bf5-ad44-d1aad1c78586	c71.9	notreported	-17515	notreported	notreported
THCA	c73	male	stageiva	nothispanicorlatino	white	THCA_unc.edu.27ecc5f8-6232-48bb-8a1f-fa46af7a9309.1902168.rsem.isoforms.results	cd0c33c3-4427-471d-979e-79dc43f3a018	c73.9	1940	null	null	null	null	null	null	null	Primary Tumor	notreported	26179	alive	null	null	null	764.0	null	null	4405f62a-8b1b-5a99-9d8c-8a0535f0dc72	c73.9	notreported	-26179	notreported	notreported
THCA	c73	female	stageii	nothispanicorlatino	asian	THCA_unc.edu.36618b4c-c4da-4513-a4b7-6579f3cffeb2.1666396.rsem.isoforms.results	aa3ce865-4bc1-4cca-9ba8-35ff4c5e165e	c73.9	1955	null	null	null	null	null	null	null	Primary Tumor	notreported	20874	alive	null	null	null	931.0	null	null	0d097850-91ac-5708-9408-674951030e64	c73.9	notreported	-20874	notreported	notreported
GBM	c71.9	male	notreported	nothispanicorlatino	white	GBM_unc.edu.f5fffae0-0fbe-40f8-93d7-525407048620.1532661.rsem.isoforms.results	e876dd29-68b0-4bf1-83d1-488c40068a35	c71.9	1944	null	null	null	null	null	null	null	Primary Tumor	notreported	24134	dead	null	585.0	null	323.0	null	null	ac0b1caf-54a0-5d33-8eba-acfacf485f32	c71.9	notreported	-24134	notreported	notreported
OV	c56.9	female	notreported	notreported	white	OV_unc.edu.bb12d2f5-1865-435a-8edf-f9ee7689e0a4.2723287.rsem.isoforms.results	7d82ce56-32eb-4107-aa5c-c568764805c9	c56.9	1955	null	null	null	null	null	null	null	Primary Tumor	notreported	19151	alive	null	null	null	885.0	null	null	e53d6502-63a5-5b12-b41d-ff5effc62a8e	c56.9	notreported	-19151	notreported	notreported
THCA	c73	female	stagei	notreported	notreported	THCA_unc.edu.69b918b2-61b4-42a1-9f60-d9743936cb81.1564184.rsem.isoforms.results	c9c00e4f-4092-400e-aebb-3d9961be0f0e	c73.9	1986	null	null	null	null	null	null	null	Primary Tumor	notreported	9042	alive	null	null	null	850.0	null	null	0f249582-9978-5a3a-bbe9-18b6074ded27	c73.9	notreported	-9042	notreported	notreported
THCA	c73	female	stageiii	nothispanicorlatino	white	THCA_unc.edu.e491502d-1c89-4629-83b6-7c00420e8804.1926751.rsem.isoforms.results	b8cb385a-4e5f-4932-944d-04d6ea1bba5a	c73.9	1964	null	null	null	null	null	null	null	Primary Tumor	notreported	17831	alive	null	null	null	725.0	null	null	eb17ad11-5aa1-5154-9729-6c2bfee51ca5	c73.9	notreported	-17831	notreported	notreported
GBM	c71.9	male	notreported	nothispanicorlatino	white	GBM_unc.edu.2db5af77-d0af-4c3c-bd2a-779e0a7228e0.1544705.rsem.isoforms.results	30011f30-2926-47f2-a8f3-4f1b58ffa227	c71.9	1947	null	null	null	null	null	null	null	Primary Tumor	notreported	22916	dead	null	485.0	null	485.0	null	null	c57d8c00-a082-56c0-9d5e-389441cc9523	c71.9	notreported	-22916	notreported	notreported
GBM	c71.9	male	notreported	nothispanicorlatino	white	GBM_unc.edu.04e97d81-96bb-40e7-9e8c-1efb19179a62.1545264.rsem.isoforms.results	44ef426e-b67d-4b49-80a3-86681b9abf1a	c71.9	1954	null	null	null	null	null	null	null	Primary Tumor	notreported	19657	dead	null	82.0	null	82.0	null	null	dfb8dd68-1b27-5d4b-bf6a-7c7013d4485e	c71.9	notreported	-19657	notreported	notreported
THCA	c73	female	stageiii	nothispanicorlatino	white	THCA_unc.edu.ec1d84cb-235b-488f-adc8-54006bc36850.1661127.rsem.isoforms.results	861f94ce-45ff-4588-addb-e1ea48878c2e	c73.9	1956	null	null	null	null	null	null	null	Solid Tissue Normal	notreported	16798	alive	null	null	null	4335.0	null	null	2df8ef1d-9726-5185-9840-aa530b7f1e49	c73.9	notreported	-16798	notreported	notreported
BLCA	c67.2	male	stageiv	nothispanicorlatino	white	BLCA_unc.edu.6f3b244b-47b9-4af4-85c5-0051f6688aa8.2503666.rsem.isoforms.results	3b16881a-88c2-4048-b78f-e3e183503f70	c67.2	1938	0.7671232876712328	118.0	null	null	0.003447772096420745	null	185.0	Primary Tumor	notreported	27049	alive	null	null	null	1003.0	null	null	e4a9cde6-7172-5e93-a3b0-bb1eb50875bd	c67.2	notreported	-27049	notreported	notreported
LGG	c71.0	male	notreported	nothispanicorlatino	white	LGG_unc.edu.4e7bf9e5-e1a5-4a5b-8e32-0768fdf4a3cf.2269405.rsem.isoforms.results	84d80bcf-da24-4b93-bfe3-3d2d53b8b07d	c71.0	1980	null	null	null	null	null	null	null	Primary Tumor	notreported	11286	alive	null	null	null	1500.0	null	null	eb23f588-e419-5503-a3c9-a722ce47c5d9	c71.0	notreported	-11286	notreported	notreported
LGG	c71.9	female	notreported	nothispanicorlatino	white	LGG_unc.edu.f5dd58db-4834-4d0e-aeb6-15d6b8f05826.2408524.rsem.isoforms.results	145c3685-f6de-4669-8ec4-6c3431a90532	c71.9	1958	null	null	null	null	null	null	null	Primary Tumor	notreported	19903	alive	null	null	null	301.0	null	null	170b8efb-8750-530d-bc04-971f91cd479d	c71.9	notreported	-19903	notreported	notreported
LGG	c71.0	male	notreported	nothispanicorlatino	white	LGG_unc.edu.a3966107-19e4-467c-a692-9a154cc09c20.2325256.rsem.isoforms.results	ef12bfb7-4147-407f-84e9-586dbb10d583	c71.0	1975	null	null	null	null	null	null	null	Primary Tumor	notreported	11764	alive	null	null	null	2565.0	null	null	3ca43557-04b6-58e7-becd-5cb7e4b89e45	c71.0	notreported	-11764	notreported	notreported
OV	c56.9	female	notreported	nothispanicorlatino	white	OV_unc.edu.e78c6cd7-67f2-4ac8-9dd9-c46392459835.1519430.rsem.isoforms.results	ac2e88ff-8b1e-4691-9a96-5a581f98d827	c56.9	1942	null	null	null	null	null	null	null	Primary Tumor	notreported	24006	alive	null	null	null	772.0	null	null	b3cd76a3-af1c-573b-b5fc-42c3ee779e66	c56.9	notreported	-24006	notreported	notreported
OV	c56.9	female	notreported	notreported	white	OV_unc.edu.e78f43ff-0b31-4f9b-a9c1-02155ee3d8b0.1518858.rsem.isoforms.results	062982f8-9f49-425a-99e9-008af5ed9040	c56.9	1931	null	null	null	null	null	null	null	Primary Tumor	notreported	23855	dead	null	857.0	null	857.0	null	null	0e6482de-13e4-5907-b7c0-18515ebd9c3d	c56.9	notreported	-23855	notreported	notreported
OV	c56.9	female	notreported	notreported	notreported	OV_unc.edu.0d75483f-eab3-41c8-b2cc-453af29b6f44.1552084.rsem.isoforms.results	8e1b8811-1eb2-4337-852c-c19eaa0ee418	c56.9	1938	null	null	null	null	null	null	null	Primary Tumor	notreported	23850	alive	null	null	null	1722.0	null	null	d601544b-eacc-5b79-b206-68fa1be8c0ac	c56.9	notreported	-23850	notreported	notreported
BLCA	c67.9	male	stageii	nothispanicorlatino	white	BLCA_unc.edu.ad2ee4b7-ec51-4076-bc5b-6601b5abeecb.1474984.rsem.isoforms.results	1ff60fd9-3ca3-43be-92a8-8dba2cd4d4df	c67.9	1932	null	130.0	null	null	0.0038818716593508316	null	183.0	Primary Tumor	notreported	29065	alive	null	null	null	481.0	null	null	4d51b5fd-9656-5d5d-9b90-83b9f56ad6bd	c67.9	notreported	-29065	notreported	notreported
THCA	c73	female	stageiii	nothispanicorlatino	asian	THCA_unc.edu.7e9d858a-10ed-4a90-b7da-b13958393555.1214712.rsem.isoforms.results	b07435d4-1341-4b41-9b11-d13a4f1ca0ad	c73.9	1954	null	null	null	null	null	null	null	Primary Tumor	notreported	20784	alive	null	null	null	1020.0	null	null	2e9448bf-e13d-573a-9a7b-feab0585a235	c73.9	notreported	-20784	notreported	notreported
LGG	c71.0	male	notreported	nothispanicorlatino	white	LGG_unc.edu.669947ca-d955-4bcd-b593-bf86f1edb8df.1977573.rsem.isoforms.results	d87742fd-ff94-4ef0-bbf4-5dd5a185a0e7	c71.0	1985	null	null	null	null	null	null	null	Primary Tumor	notreported	10027	alive	null	null	null	-10.0	null	null	4e34296b-cbaa-51d3-ac7a-52d7c10b4df3	c71.0	notreported	-10027	notreported	notreported
BLCA	c67.9	male	stageiv	nothispanicorlatino	white	BLCA_unc.edu.10e3d6b9-8f72-4902-94ca-f89811b98e35.1781736.rsem.isoforms.results	4d323b18-ce5a-4516-862d-7ed1fdf1f008	c67.9	1951	3.1780821917808217	81.0	null	null	0.002366691015339664	null	185.0	Primary Tumor	notreported	22515	alive	null	null	null	758.0	null	null	6ada1e41-4e02-5272-99d5-644fd0c14fb5	c67.9	notreported	-22515	notreported	notreported
GBM	c71.9	male	notreported	nothispanicorlatino	white	GBM_unc.edu.e99614f9-51d8-4096-83af-8effd5266881.1534986.rsem.isoforms.results	55a063b0-98ad-4700-b3ce-61bfe364fec8	c71.9	1944	null	null	null	null	null	null	null	Primary Tumor	notreported	23759	dead	null	133.0	null	133.0	null	null	30647248-8082-5c19-8d2d-885e77e2ca6f	c71.9	notreported	-23759	notreported	notreported
BLCA	c67.9	male	stageiii	nothispanicorlatino	white	BLCA_unc.edu.168e440a-b356-45c7-849c-43823703417e.2032083.rsem.isoforms.results	7a7fcdd3-cce9-47cf-a26f-cc6ff34ecd9a	c67.9	1942	2.0273972602739727	81.0	null	null	0.0026448979591836737	null	175.0	Primary Tumor	notreported	25706	dead	null	56.0	null	null	null	null	e3d3288c-fd62-5f04-aee1-0e23f4bd5ce9	c67.9	notreported	-25706	notreported	notreported
LGG	c71.0	female	notreported	nothispanicorlatino	white	LGG_unc.edu.50ec944a-3bb5-41b1-965e-e5cf7f5bd24b.1427026.rsem.isoforms.results	c0d47e0f-4918-4e06-9db6-201671b1259c	c71.0	1976	null	null	null	null	null	null	null	Primary Tumor	notreported	9021	dead	null	4068.0	null	null	null	null	9e2c8f99-8d0f-5304-95a5-ae41e113650c	c71.0	notreported	-9021	notreported	notreported
GBM	c71.9	male	notreported	notreported	white	GBM_unc.edu.48a2ae8d-a9c4-4d06-8619-ad49502b3721.1543289.rsem.isoforms.results	7cbabf1d-ec38-4048-ae1c-7d0f3001691b	c71.9	1951	null	null	null	null	null	null	null	Primary Tumor	notreported	20050	dead	null	342.0	null	342.0	null	null	a4091db7-41ff-5995-886c-e0568bda7eb9	c71.9	notreported	-20050	notreported	notreported
THCA	c73	female	stagei	nothispanicorlatino	white	THCA_unc.edu.68a09a90-0fef-4eba-bba8-b6f0dbb74b75.1666277.rsem.isoforms.results	e2475d48-628b-4095-b101-865d79a4b0ed	c73.9	1974	null	null	null	null	null	null	null	Solid Tissue Normal	notreported	12649	alive	null	null	null	1895.0	null	null	5d6b72de-aa81-54de-b8ce-b80b99f321fb	c73.9	notreported	-12649	notreported	notreported
THCA	c73	female	stagei	nothispanicorlatino	white	THCA_unc.edu.7bf6ccc1-5c04-4ae6-9f92-af14171cdf89.1215948.rsem.isoforms.results	1e63d4b3-1b49-4bb9-b64f-001273aae120	c73.9	1969	null	null	null	null	null	null	null	Primary Tumor	notreported	15411	alive	null	null	null	623.0	null	null	0b3b9acc-95cb-51fa-ad5d-4288e8079f5a	c73.9	notreported	-15411	notreported	notreported
GBM	c71.9	male	notreported	nothispanicorlatino	white	GBM_unc.edu.d5a281fd-c004-477f-af62-c55fe20f1dee.1538221.rsem.isoforms.results	2f4a127f-101a-4192-b3e8-f9be2c8648bc	c71.9	1958	null	null	null	null	null	null	null	Primary Tumor	notreported	18891	dead	null	5.0	null	5.0	null	null	aff26df9-3a85-5d19-80bc-15824a2780da	c71.9	notreported	-18891	notreported	notreported
THCA	c73	female	stageiii	hispanicorlatino	white	THCA_unc.edu.23e64279-3952-49d7-bcfa-7f1ead36304c.1563991.rsem.isoforms.results	dde7ade8-de24-467f-855d-a422bbede407	c73.9	1930	null	null	null	null	null	null	null	Primary Tumor	notreported	26632	alive	null	null	null	4137.0	null	null	2b591a1b-4d2f-5d08-9e4a-90b8dc8cb7ed	c73.9	notreported	-26632	notreported	notreported
GBM	c71.9	male	notreported	nothispanicorlatino	white	GBM_unc.edu.33daf82d-0b4d-474e-84d7-f21c47077c95.1542893.rsem.isoforms.results	e0e1b5b3-6e3c-4b79-aa2a-32b320c3e45a	c71.9	1937	null	null	null	null	null	null	null	Primary Tumor	notreported	25684	dead	null	232.0	null	null	null	null	53846869-2114-5ff2-9728-15f5f22fa72a	c71.9	notreported	-25684	notreported	notreported
BLCA	c67.9	male	stageiii	nothispanicorlatino	white	BLCA_unc.edu.183b63ef-c966-4348-a989-9c7e2b4a8082.2502535.rsem.isoforms.results	7d198ee2-d80a-4759-804f-a7ef85971843	c67.9	1945	null	103.0	null	null	0.0032146312537061888	null	179.0	Primary Tumor	notreported	24260	alive	null	null	null	1186.0	null	null	b456f4b3-8509-5786-9f6c-afaf494e7b7c	c67.9	notreported	-24260	notreported	notreported
BLCA	c67.4	female	stageiv	nothispanicorlatino	white	BLCA_unc.edu.4333b9aa-34fb-429f-b622-6ab259f12367.2640746.rsem.isoforms.results	f57122dd-a6f1-484d-b08a-cb1194de2f9d	c67.4	1933	0.547945205479452	64.0	null	null	0.002596454217209623	null	157.0	Primary Tumor	notreported	27496	dead	null	408.0	null	null	null	null	1334366f-f1d8-570a-b4b5-281dd824265a	c67.4	notreported	-27496	notreported	notreported
BLCA	c67.2	male	stageiii	nothispanicorlatino	white	BLCA_unc.edu.58382a39-eb95-4cd0-ad04-48c6da4b4a56.1348780.rsem.isoforms.results	fc0032db-b6d8-4da3-bd1b-beec4196abf0	c67.2	1939	2.191780821917808	107.5	null	null	0.0032276224432351286	null	182.5	Primary Tumor	notreported	26562	dead	null	250.0	null	null	null	null	e28be400-26e7-52f0-8880-e455bd45253c	c67.2	notreported	-26562	notreported	notreported
BLCA	c67.9	male	stageiii	nothispanicorlatino	white	BLCA_unc.edu.949b3248-f078-43cc-b6d8-39e9eabf88f1.2545692.rsem.isoforms.results	317e1db6-df93-4793-a4df-2fa234d8a81a	c67.9	1944	0.821917808219178	87.0	null	null	0.0024615210502489816	null	188.0	Primary Tumor	notreported	23403	dead	null	418.0	null	null	null	null	aa19bec6-d4c6-5712-ace9-a454086dffbc	c67.9	notreported	-23403	notreported	notreported
LGG	c71.9	female	notreported	nothispanicorlatino	white	LGG_unc.edu.80dac2db-4e32-4854-ba10-2d9aa059bf45.1649770.rsem.isoforms.results	48314732-5d1c-43e6-9878-5b58dfaeb06a	c71.9	1973	null	null	null	null	null	null	null	Primary Tumor	notreported	13564	alive	null	null	null	4.0	null	null	bc3fdf20-11b5-5bed-95ce-13dec3e7d933	c71.9	notreported	-13564	notreported	notreported
OV	c56.9	female	notreported	notreported	blackorafricanamerican	OV_unc.edu.4b0f78ad-6fd4-4aaf-af08-45bb379ba8d9.2705126.rsem.isoforms.results	bc84c5c5-1785-4edd-b732-8987f862063e	c56.9	1952	null	null	null	null	null	null	null	Primary Tumor	notreported	22438	alive	null	null	null	361.0	null	null	14b248c8-51a1-5f37-9c1f-5b310254bd02	c56.9	notreported	-22438	notreported	notreported
BLCA	c67.0	female	stageiii	nothispanicorlatino	white	BLCA_unc.edu.febead73-3b12-44e6-8bab-a7cfa7bf1129.1179063.rsem.isoforms.results	f48937ed-e294-41f0-8872-7010391167a9	c67.0	1924	null	null	null	null	null	null	null	Primary Tumor	notreported	29634	dead	null	544.0	null	null	null	null	fd5abf15-15b7-5e02-98b2-b7341ea21b47	c67.0	notreported	-29634	notreported	notreported
LGG	c71.0	female	notreported	nothispanicorlatino	white	LGG_unc.edu.8d03eb0d-b6f2-4b28-aa26-4de13bd37270.1954329.rsem.isoforms.results	274496d6-0a9b-45ca-876f-b91f7277963c	c71.0	1961	null	null	null	null	null	null	null	Primary Tumor	notreported	18799	alive	null	null	null	792.0	null	null	7f33b429-d74b-533c-b0da-dc99827268e9	c71.0	notreported	-18799	notreported	notreported
THCA	c73	female	stageii	nothispanicorlatino	white	THCA_unc.edu.a38de7c6-26c2-4a7e-90e5-79b778de8b5d.1328468.rsem.isoforms.results	154b4e7f-06f9-4813-beab-232227229f8b	c73.9	1964	null	null	null	null	null	null	null	Primary Tumor	notreported	14814	alive	null	null	null	3076.0	null	null	c6d07291-57d9-599e-a974-96005a69a36b	c73.9	notreported	-14814	notreported	notreported
LGG	c71.0	male	notreported	nothispanicorlatino	white	LGG_unc.edu.ae0546ae-4f2e-4824-94d6-91fefd7fddbb.1553917.rsem.isoforms.results	dcd0856d-423a-40d7-8070-4c0988d61416	c71.0	1979	null	null	null	null	null	null	null	Primary Tumor	notreported	11291	alive	null	null	null	1401.0	null	null	2db950b4-89f3-54d8-9c80-cc88a1efa0ea	c71.0	notreported	-11291	notreported	notreported
LGG	c71.0	male	notreported	nothispanicorlatino	white	LGG_unc.edu.acf520e1-55ec-41e7-a2a5-1e9eabac0b93.2309134.rsem.isoforms.results	62088274-a45b-4616-b086-b0ddd64895f0	c71.0	1965	null	null	null	null	null	null	null	Primary Tumor	notreported	17692	alive	null	null	null	508.0	null	null	7eacc35e-fe59-58d6-936a-a92d72fb4f2b	c71.0	notreported	-17692	notreported	notreported
LGG	c71.0	male	notreported	nothispanicorlatino	white	LGG_unc.edu.10f6eea5-bfb0-4203-92c8-5572a81d0b8e.2326765.rsem.isoforms.results	94b95c07-5f70-4a1b-b40f-dc13f6a160d5	c71.0	1973	null	null	null	null	null	null	null	Primary Tumor	notreported	14422	alive	null	null	null	715.0	null	null	c9c05b2a-9023-5523-8855-48da59d13446	c71.0	notreported	-14422	notreported	notreported
GBM	c71.9	female	notreported	nothispanicorlatino	white	GBM_unc.edu.10bfa2d8-228f-43d8-ae15-1f58c25d1be3.1544875.rsem.isoforms.results	d73ca945-b60b-4b5c-ac53-7ef2602a4951	c71.9	1945	null	null	null	null	null	null	null	Primary Tumor	notreported	23782	alive	null	null	null	48.0	null	null	fb77ea3b-d94a-5918-afdd-e78f676f100a	c71.9	notreported	-23782	notreported	notreported
BLCA	c67.9	male	stageiv	notreported	notreported	BLCA_unc.edu.728aaa87-e83d-47ff-9559-5f2de0152949.2397349.rsem.isoforms.results	9dd41965-7a62-464d-8a23-5c3f9565dd91	c67.9	1927	null	50.0	null	null	0.0018818924310286425	null	163.0	Primary Tumor	notreported	30774	alive	null	null	null	1538.0	null	null	a4e059f2-d702-51a5-8f0c-cba5a3877af8	c67.9	notreported	-30774	notreported	notreported
LGG	c71.9	female	notreported	hispanicorlatino	white	LGG_unc.edu.3042bdd7-5fc9-4428-afcc-ecd76f71d68d.1650401.rsem.isoforms.results	62e27075-7ddc-4f15-ac21-0a8244abb12d	c71.9	1978	null	null	null	null	null	null	null	Primary Tumor	notreported	11970	alive	null	null	null	23.0	null	null	abb2dcc4-f1de-5f90-a695-9c0383f5b31f	c71.9	notreported	-11970	notreported	notreported
BLCA	c67.9	male	stageii	nothispanicorlatino	asian	BLCA_unc.edu.c27a2180-0dec-43ec-bf0f-2cb0acaea022.1821739.rsem.isoforms.results	82d5f37f-5a1b-49d8-b990-ac222b4e1c1d	c67.9	1952	1.095890410958904	62.0	null	null	0.002024489795918367	null	175.0	Primary Tumor	notreported	22200	alive	null	null	null	384.0	null	null	82d9dc61-fdf4-5e7d-b8b1-5f8bebddb4cd	c67.9	notreported	-22200	notreported	notreported
OV	c56.9	female	notreported	nothispanicorlatino	white	OV_unc.edu.d10f0cee-d755-43cc-8d3d-8974cea0defb.1519288.rsem.isoforms.results	15556b28-c6bd-455a-87b6-4b7b3e33d0e4	c56.9	1927	null	null	null	null	null	null	null	Primary Tumor	notreported	27749	dead	null	1091.0	null	1081.0	null	null	ccfe5d13-dadc-5a66-a404-f202b80053e2	c56.9	notreported	-27749	notreported	notreported
LGG	c71.0	female	notreported	notreported	white	LGG_unc.edu.6f1fe75a-f3ef-4f1b-9781-e340db9bab45.2400603.rsem.isoforms.results	0073a136-d5f4-4fd6-88f9-711768f2abc6	c71.0	1969	null	null	null	null	null	null	null	Primary Tumor	notreported	16334	alive	null	null	null	609.0	null	null	679e9de4-708c-5a80-a0f0-e3338b49867e	c71.0	notreported	-16334	notreported	notreported
THCA	c73	male	stagei	nothispanicorlatino	white	THCA_unc.edu.f88af011-238b-465b-b83c-f4c4ce1fa296.1566315.rsem.isoforms.results	029da211-9b52-45ad-b0dc-2322da783c9c	c73.9	1942	null	null	null	null	null	null	null	Primary Tumor	notreported	25462	alive	null	null	null	491.0	null	null	c01c6d6e-3fed-58f2-af9c-2a6c50e07bc4	c73.9	notreported	-25462	notreported	notreported
THCA	c73	female	stagei	nothispanicorlatino	white	THCA_unc.edu.2b0baba1-90ef-47ad-9910-44b522f7182d.1661616.rsem.isoforms.results	6ee95dc8-2bac-4691-afa2-8222e07506ad	c73.9	1973	null	null	null	null	null	null	null	Primary Tumor	notreported	13634	alive	null	null	null	998.0	null	null	3c28ff76-4b37-58dc-998c-6f30d14b6bfb	c73.9	notreported	-13634	notreported	notreported
OV	c56.9	female	notreported	notreported	white	OV_unc.edu.dbc2cfac-df65-4750-af39-37760bad1057.1517854.rsem.isoforms.results	28ed2d42-5b4c-4bca-b2b2-6b2a6d3c42cf	c56.9	1929	null	null	null	null	null	null	null	Primary Tumor	notreported	25831	dead	null	25.0	null	25.0	null	null	54c4860f-11d8-5cff-be3e-d4405cc30f73	c56.9	notreported	-25831	notreported	notreported
THCA	c73	male	stageiii	notreported	white	THCA_unc.edu.7ef03172-68be-438a-85cd-b9db97ffd5b9.1654847.rsem.isoforms.results	63c20d30-3bc9-4dca-8a8d-09fdea41f288	c73.9	1967	null	null	null	null	null	null	null	Primary Tumor	notreported	16609	alive	null	null	null	75.0	null	null	a4ac1d83-16f9-5ec0-b2dc-0cab95f113d1	c73.9	notreported	-16609	notreported	notreported
OV	c56.9	female	notreported	nothispanicorlatino	white	OV_unc.edu.a209a8f4-9462-4ade-be57-caaec54999cb.1522638.rsem.isoforms.results	758e6b52-062e-4ca0-84d1-ea38477414ac	c56.9	1924	null	null	null	null	null	null	null	Primary Tumor	notreported	null	dead	null	286.0	null	null	null	null	ea0ad7ed-ad39-564d-80bc-d7365bdeeff0	c56.9	notreported	null	notreported	notreported
OV	c56.9	female	notreported	notreported	white	OV_unc.edu.f83833b8-8cb2-44d8-8ac7-c4d2d2463053.1519201.rsem.isoforms.results	b4225c44-b9b6-46c5-aabf-7b0d9a9fe20b	c56.9	1944	null	null	null	null	null	null	null	Primary Tumor	notreported	18664	dead	null	1470.0	null	1435.0	null	null	462c9b3c-1b04-5e25-bdd0-cb23c26c7256	c56.9	notreported	-18664	notreported	notreported
GBM	c71.9	male	notreported	nothispanicorlatino	white	GBM_unc.edu.67b4bd07-77fd-4595-b2a0-5f3a3a43a221.1541087.rsem.isoforms.results	15e058e8-2f33-4fb4-92af-3d9dea1fa906	c71.9	1941	null	null	null	null	null	null	null	Primary Tumor	notreported	20932	dead	null	178.0	null	164.0	null	null	e8421640-c7bd-5e2e-9bf9-4b88601331bc	c71.9	notreported	-20932	notreported	notreported
THCA	c73	female	stagei	nothispanicorlatino	white	THCA_unc.edu.016536b0-a6c4-4b7c-81c5-9fca8315c94f.1903728.rsem.isoforms.results	64131b0b-9f36-44be-8bec-92c71ec36343	c73.9	1976	null	null	null	null	null	null	null	Primary Tumor	notreported	13275	alive	null	null	null	823.0	null	null	975359c7-8d72-5993-a4b4-a5f1f6d99a54	c73.9	notreported	-13275	notreported	notreported
LGG	c71.0	male	notreported	nothispanicorlatino	white	LGG_unc.edu.654ea6d9-1a5b-442a-8627-5d6f4baa8460.1649829.rsem.isoforms.results	c81d4681-c02f-4b33-abe0-b6ad7d61194d	c71.0	1982	null	null	null	null	null	null	null	Primary Tumor	notreported	10824	alive	null	null	null	629.0	null	null	e3fb4c53-7a27-568d-a91f-00eb8fd0f8c7	c71.0	notreported	-10824	notreported	notreported
OV	c56.9	female	notreported	nothispanicorlatino	white	OV_unc.edu.7cfe1419-65be-4860-9f99-75f4a139d9ac.1533512.rsem.isoforms.results	c0c3caab-9277-4a31-a96c-c607e38d5ccc	c56.9	1945	null	null	null	null	null	null	null	Primary Tumor	notreported	20409	dead	null	2089.0	null	2089.0	null	null	2f26a07c-893d-5252-be5b-5dcb2902113a	c56.9	notreported	-20409	notreported	notreported
BLCA	c67.9	male	stageii	nothispanicorlatino	blackorafricanamerican	BLCA_unc.edu.df755d45-141e-40d1-96c8-6bfe29c17edc.1351599.rsem.isoforms.results	af53d51e-0b5c-437f-a1c0-ec5f55c49364	c67.9	1942	null	83.6	null	null	0.0030707070707070706	null	165.0	Primary Tumor	notreported	24149	dead	null	220.0	null	214.0	null	null	c4e50bc8-2321-5989-a4ed-b5ff9cf5d14e	c67.9	notreported	-24149	notreported	notreported
LGG	c71.0	male	notreported	nothispanicorlatino	white	LGG_unc.edu.72b6a847-016f-4565-a5aa-e277c5cffb08.2056051.rsem.isoforms.results	176d89d7-f8f1-4a72-b45a-31cbe1632a30	c71.0	1958	null	null	null	null	null	null	null	Primary Tumor	notreported	19950	alive	null	null	null	889.0	null	null	c6700507-19d0-552b-b87c-6dc3370021c8	c71.0	notreported	-19950	notreported	notreported
THCA	c73	female	stagei	nothispanicorlatino	white	THCA_unc.edu.8eb57b3e-64eb-408d-ad2d-1ff2c0e69506.1229786.rsem.isoforms.results	e70feafd-1390-4f4c-a635-da65c1a7daeb	c73.9	1989	null	null	null	null	null	null	null	Primary Tumor	notreported	6770	alive	null	null	null	751.0	null	null	32dac375-e509-5b44-8fbe-49c61d2ebb83	c73.9	notreported	-6770	notreported	notreported
OV	c56.9	female	notreported	nothispanicorlatino	white	OV_unc.edu.c3a1cbaf-28cd-451c-ad93-5a03a61a8a2c.2722257.rsem.isoforms.results	3bc8a74f-49bd-46b6-a3a4-68ca838e83c6	c56.9	1940	null	null	null	null	null	null	null	Primary Tumor	notreported	23711	dead	null	90.0	null	90.0	null	null	012f225f-1cb8-5962-a806-b05cca31ffd9	c56.9	notreported	-23711	notreported	notreported
LGG	c71.9	female	notreported	nothispanicorlatino	white	LGG_unc.edu.8f248b27-4433-493d-87d7-e9e174317470.1509907.rsem.isoforms.results	a6ee311c-0a7b-4f47-86f1-f2164b128f9c	c71.9	1938	null	null	null	null	null	null	null	Primary Tumor	notreported	22837	dead	null	1762.0	null	null	null	null	83cc794f-76b7-5ced-8b6f-a965f10aa93a	c71.9	notreported	-22837	notreported	notreported
THCA	c73	female	stagei	nothispanicorlatino	white	THCA_unc.edu.d038b388-e5e0-4ee8-af7c-4d044128e3b8.1656750.rsem.isoforms.results	2513ab46-646c-4750-ab42-de3940890553	c73.9	1987	null	null	null	null	null	null	null	Primary Tumor	notreported	8963	alive	null	null	null	1350.0	null	null	de5a01f4-102e-54c5-b976-3c2631881c3a	c73.9	notreported	-8963	notreported	notreported
GBM	c71.9	female	notreported	notreported	white	GBM_unc.edu.ca803595-2792-4d7d-81f6-cce8d96d0119.1538222.rsem.isoforms.results	752a6e21-9a91-417f-beba-bfdf331d5cac	c71.9	1935	null	null	null	null	null	null	null	Primary Tumor	notreported	25812	dead	null	279.0	null	279.0	null	null	1d29c2cb-1d94-5845-8543-6d2db03739e6	c71.9	notreported	-25812	notreported	notreported
BLCA	c67.0	female	stageiii	nothispanicorlatino	white	BLCA_unc.edu.1cc49a56-ee39-4fd1-bf80-a6b71695c1f1.1228276.rsem.isoforms.results	4b5d873b-bfda-482e-92a0-bf84c0f9032a	c67.0	1937	1.7534246575342465	104.33	null	null	0.0036024019475082835	null	170.18	Primary Tumor	notreported	27068	dead	null	974.0	null	392.0	null	null	12f839e8-ea9e-53c6-b764-6b74f431db21	c67.0	notreported	-27068	notreported	notreported
THCA	c73	female	stagei	nothispanicorlatino	white	THCA_unc.edu.70039c47-db43-4df9-ae1f-1ef7d9b7edec.1660737.rsem.isoforms.results	bf193c4f-fbac-41bc-b1af-19b6ce856f0f	c73.9	1982	null	null	null	null	null	null	null	Solid Tissue Normal	notreported	10956	alive	null	null	null	335.0	null	null	9040d4d6-cd7f-5cb1-b4ef-b85f7190a630	c73.9	notreported	-10956	notreported	notreported
LGG	c71.0	male	notreported	nothispanicorlatino	white	LGG_unc.edu.90199c77-d6ef-4a7a-b08c-28bed0c888b1.2055686.rsem.isoforms.results	cb1e9916-c03f-405a-a797-15823df09c8e	c71.0	1958	null	null	null	null	null	null	null	Primary Tumor	notreported	19156	alive	null	null	null	1279.0	null	null	124cdf2a-124f-5715-bedd-5b2e886cc7d5	c71.0	notreported	-19156	notreported	notreported
BLCA	c67.2	male	stageiii	nothispanicorlatino	white	BLCA_unc.edu.cfb10485-b097-4470-bd7e-5ed2abd2e8ac.1180892.rsem.isoforms.results	c0e7fbe7-b9cb-4e65-941b-cd7d581c54ec	c67.2	1928	null	null	null	null	null	null	null	Primary Tumor	notreported	27534	dead	null	370.0	null	null	null	null	5535ed45-eba5-535e-988b-d6fce1e33008	c67.2	notreported	-27534	notreported	notreported
LGG	c71.0	female	notreported	nothispanicorlatino	white	LGG_unc.edu.6a2adcf5-fc75-46a4-a029-dd84d1a019c0.2055895.rsem.isoforms.results	e89f7631-fdac-4be9-9997-70e400efdc04	c71.0	1974	null	null	null	null	null	null	null	Primary Tumor	notreported	13892	alive	null	null	null	515.0	null	null	e8c3946b-740e-577b-8aa7-f9e4e9fe7600	c71.0	notreported	-13892	notreported	notreported
OV	c56.9	female	notreported	nothispanicorlatino	white	OV_unc.edu.605d0aed-4637-4a09-82dd-eedd1aa76ca0.1565824.rsem.isoforms.results	5c6f3cd4-19c5-418d-b1be-d3fbf63e99db	c56.9	1944	null	null	null	null	null	null	null	Primary Tumor	notreported	22031	dead	null	2012.0	null	1708.0	null	null	39542801-2152-5d8a-85de-8d641a606424	c56.9	notreported	-22031	notreported	notreported
LGG	c71.0	female	notreported	nothispanicorlatino	white	LGG_unc.edu.2398c528-0e80-4c72-a5cc-cd82c7895468.1858277.rsem.isoforms.results	80db28ec-ab3d-42a7-af88-b60fe8acb5b5	c71.0	1970	null	null	null	null	null	null	null	Primary Tumor	notreported	14910	dead	null	1152.0	null	654.0	null	null	5d4def67-e8ea-51b6-905f-33ecf672c56b	c71.0	notreported	-14910	notreported	notreported
THCA	c73	female	stageiii	nothispanicorlatino	white	THCA_unc.edu.2d5e9d92-0fe5-4d07-b9e0-6f26d9e0a266.1662151.rsem.isoforms.results	29c4319c-3ead-42b1-810d-418da8d515c4	c73.9	1960	null	null	null	null	null	null	null	Primary Tumor	notreported	18903	alive	null	null	null	709.0	null	null	0ca2c715-0580-5684-ac1f-0e804fa332d9	c73.9	notreported	-18903	notreported	notreported
THCA	c73	female	stagei	nothispanicorlatino	white	THCA_unc.edu.eb23bf14-0f53-4e8c-9d50-2d9743a620c3.1037043.rsem.isoforms.results	77bb90f0-e923-4e28-bb88-4d6b420e0b5c	c73.9	1967	null	null	null	null	null	null	null	Primary Tumor	notreported	16253	alive	null	null	null	1145.0	null	null	2aadd1ea-3777-597a-9157-753e1550a009	c73.9	notreported	-16253	notreported	notreported
BLCA	c67.9	female	stageiv	nothispanicorlatino	white	BLCA_unc.edu.381f4721-580b-4b93-9988-862780e177bb.1226093.rsem.isoforms.results	5d54c742-5a8e-4c40-8d62-95e75e210ab8	c67.9	1958	1.6986301369863013	54.0	null	null	0.002432322868339264	null	149.0	Solid Tissue Normal	notreported	19498	alive	null	null	null	812.0	null	null	870f150b-96ab-535d-943c-923968f71a41	c67.9	notreported	-19498	notreported	notreported
BLCA	c67.4	female	stageiii	nothispanicorlatino	white	BLCA_unc.edu.5cfa74de-919c-4c0a-9f17-d609268723d6.2545330.rsem.isoforms.results	eb30ae33-2076-475d-aac9-804a8f1119a0	c67.4	1931	null	63.0	null	null	null	null	null	Primary Tumor	notreported	28937	dead	null	259.0	null	null	null	null	a1fdae3d-5b1a-5ba7-bd9d-51bbf4d8761c	c67.4	notreported	-28937	notreported	notreported
BLCA	c67.9	male	stageii	nothispanicorlatino	white	BLCA_unc.edu.e15e8747-ff36-464a-bfc1-2909a23bd0a3.2512074.rsem.isoforms.results	386f51e4-d03a-4606-bf2e-6168f2122c5f	c67.9	1946	2.0821917808219177	null	null	null	null	null	164.0	Primary Tumor	notreported	22480	alive	null	null	null	2703.0	null	null	6f5fd9c4-eb6e-5950-b84c-ec9a85c5c659	c67.9	notreported	-22480	notreported	notreported
LGG	c71.0	male	notreported	nothispanicorlatino	white	LGG_unc.edu.deff8fdc-d2f8-422a-b5bb-57a65241cf51.2310392.rsem.isoforms.results	688fc346-a14d-4859-8727-057cd0a0b880	c71.0	1969	null	null	null	null	null	null	null	Primary Tumor	notreported	14108	alive	null	null	null	2650.0	null	null	dda0cb48-ca72-56b8-8c31-e9b0334a6a41	c71.0	notreported	-14108	notreported	notreported
THCA	c73	male	stagei	notreported	notreported	THCA_unc.edu.3b64c3a6-42e7-434d-9ace-221f68e831f2.1456459.rsem.isoforms.results	d8d54c81-7ef5-4b0f-b35b-28fbf8c5198e	c73.9	1972	null	null	null	null	null	null	null	Primary Tumor	notreported	14399	alive	null	null	null	941.0	null	null	00826608-e988-5d59-8c94-07fd677d706f	c73.9	notreported	-14399	notreported	notreported
OV	c56.9	female	notreported	nothispanicorlatino	white	OV_unc.edu.eb61bd52-e5fa-4c33-a2e4-1353a42184d9.1518521.rsem.isoforms.results	bc4bc342-20bf-40c3-af26-2c6f942da93d	c56.9	1957	null	null	null	null	null	null	null	Primary Tumor	notreported	17528	alive	null	null	null	3871.0	null	null	b1652541-14ef-5640-8541-d042fdc2524a	c56.9	notreported	-17528	notreported	notreported
LGG	c71.0	female	notreported	nothispanicorlatino	white	LGG_unc.edu.74cb268c-d8bc-44f2-8872-f176fa8221be.2331150.rsem.isoforms.results	a418fe65-dfdd-4c84-b27c-b4567b50f457	c71.0	1975	null	null	null	null	null	null	null	Primary Tumor	notreported	13961	alive	null	null	null	805.0	null	null	41542acb-b1bf-58aa-9279-315db794eb79	c71.0	notreported	-13961	notreported	notreported
BLCA	c67.4	male	stageiv	notreported	blackorafricanamerican	BLCA_unc.edu.349245b6-2265-476a-845a-a7f44896cf52.2503985.rsem.isoforms.results	32e79b35-a33a-4ca0-bfb7-7ea7e4e26568	c67.4	1951	null	61.0	null	null	0.0019692665289256198	null	176.0	Primary Tumor	notreported	21893	dead	null	1556.0	null	1538.0	null	null	948029c4-616d-5e10-b947-f3fdbfdd3838	c67.4	notreported	-21893	notreported	notreported
THCA	c73	female	stageiii	notreported	notreported	THCA_unc.edu.e3700170-29ea-4485-8b22-93edbeedb1f7.1653952.rsem.isoforms.results	d5932dd7-b777-427f-8b55-3ec369fd76a3	c73.9	1949	null	null	null	null	null	null	null	Solid Tissue Normal	notreported	22990	alive	null	null	null	1182.0	null	null	ec115d29-2d5e-5fdb-8213-4c31e75730fe	c73.9	notreported	-22990	notreported	notreported
BLCA	c67.0	male	stageiii	notreported	notreported	BLCA_unc.edu.dfc4aacd-32b1-4cf8-91f9-3c865cf56ec9.1179762.rsem.isoforms.results	ebedab7c-dd7c-448e-8324-78c86f13be8b	c67.0	1931	2.73972602739726	null	null	null	null	null	null	Primary Tumor	notreported	26456	dead	null	795.0	null	null	null	null	db4cb9dd-289a-52ba-8ab0-aa66f8f94b0e	c67.0	notreported	-26456	notreported	notreported
LGG	c71.0	female	notreported	nothispanicorlatino	white	LGG_unc.edu.8aa3351e-ac40-409f-a2b9-4febbf3e0c47.1954413.rsem.isoforms.results	6d020185-bdde-4c43-9e38-71c6ed0c13d1	c71.0	1957	null	null	null	null	null	null	null	Primary Tumor	notreported	20296	alive	null	null	null	7.0	null	null	3d231103-35da-5eb6-ac67-490e36adf83b	c71.0	notreported	-20296	notreported	notreported
LGG	c71.0	male	notreported	nothispanicorlatino	white	LGG_unc.edu.d0f9781b-f735-4dd2-8813-f513692c0525.2401213.rsem.isoforms.results	9b161c41-4f76-4ed1-b60f-2b093bc70edb	c71.0	1979	null	null	null	null	null	null	null	Primary Tumor	notreported	11498	dead	null	1242.0	null	null	null	null	8444b364-3a2b-5c6e-874a-58dcf0907082	c71.0	notreported	-11498	notreported	notreported
GBM	c71.9	male	notreported	nothispanicorlatino	white	GBM_unc.edu.d29e5a15-6ad2-41f9-b4e8-5c4b0f3fda9e.1537438.rsem.isoforms.results	5613f5f6-086d-470b-8f77-6dcb7f8625b7	c71.9	1941	null	null	null	null	null	null	null	Primary Tumor	notreported	24471	dead	null	1426.0	null	595.0	null	null	48053e02-807a-5134-b6a4-511f932fc04e	c71.9	notreported	-24471	notreported	notreported
THCA	c73	female	stageiva	nothispanicorlatino	white	THCA_unc.edu.5b552577-3c91-402e-b9aa-45d79fa77e22.1657943.rsem.isoforms.results	905469d2-4c97-4293-a20c-1b1f0462a25d	c73.9	1954	null	null	null	null	null	null	null	Primary Tumor	notreported	21009	alive	null	null	null	423.0	null	null	73283f4e-87e8-54c7-ad37-50fb264191fc	c73.9	notreported	-21009	notreported	notreported
LGG	c71.0	female	notreported	nothispanicorlatino	white	LGG_unc.edu.922a7345-64a7-43e8-9c11-bb0bd85dd847.2039642.rsem.isoforms.results	e117fcf4-2c01-4b4d-8faf-5de7d0e839f1	c71.0	1964	null	null	null	null	null	null	null	Primary Tumor	notreported	17775	alive	null	null	null	2.0	null	null	65f06e8e-1810-571a-a6dc-22daa3f10ff7	c71.0	notreported	-17775	notreported	notreported
LGG	c71.0	male	notreported	nothispanicorlatino	white	LGG_unc.edu.c1c9f44f-935f-47b9-80cd-5116d52001c3.1372818.rsem.isoforms.results	6355cade-7b3a-43a8-9f1f-8e7bc45755a8	c71.0	1963	null	null	null	null	null	null	null	Primary Tumor	notreported	11584	dead	null	1491.0	null	null	null	null	c59505b0-f818-555e-a3e0-8a204285b64d	c71.0	notreported	-11584	notreported	notreported
OV	c56.9	female	notreported	notreported	white	OV_unc.edu.2cf309ea-0c2e-4f28-a94b-342dc9a1aae8.1562987.rsem.isoforms.results	602e2934-223a-44db-8c33-06eb05d72f94	c56.9	1941	null	null	null	null	null	null	null	Primary Tumor	notreported	23062	alive	null	null	null	761.0	null	null	f930091a-6f43-5cce-960e-931dad13eb66	c56.9	notreported	-23062	notreported	notreported
THCA	c73	female	stagei	nothispanicorlatino	white	THCA_unc.edu.4bdf2f0f-68b6-494f-95ec-659f5a2ab85c.1901148.rsem.isoforms.results	acb80b76-2394-4250-8687-60e40e16e83b	c73.9	1980	null	null	null	null	null	null	null	Primary Tumor	notreported	11813	alive	null	null	null	823.0	null	null	7fab22a8-78bd-5186-9da0-d88f399d6a4f	c73.9	notreported	-11813	notreported	notreported
LGG	c71.0	female	notreported	nothispanicorlatino	white	LGG_unc.edu.10336d59-9732-4305-9062-75bc76ee9c93.1670058.rsem.isoforms.results	5a769292-c3ce-4e18-b821-2bfe0e24978c	c71.0	1958	null	null	null	null	null	null	null	Primary Tumor	notreported	17656	alive	null	null	null	1834.0	null	null	a14305ae-39cb-581e-9871-0bc359efd15f	c71.0	notreported	-17656	notreported	notreported
THCA	c73	male	stagei	hispanicorlatino	white	THCA_unc.edu.d199cbf2-7c0b-4506-b476-2e9bd63ae514.1665642.rsem.isoforms.results	64de42bd-d134-4f44-82fa-d6614709bf01	c73.9	1973	null	null	null	null	null	null	null	Solid Tissue Normal	notreported	13103	alive	null	null	null	1808.0	null	null	06d4f335-666d-5da9-be54-00ff26df5f41	c73.9	notreported	-13103	notreported	notreported
OV	c56.9	female	notreported	notreported	white	OV_unc.edu.c20ba763-e310-448a-9c85-0b4f680e6196.2722635.rsem.isoforms.results	49d2c0cf-a3f3-4519-a755-0a5f769df2ea	c56.9	1942	null	null	null	null	null	null	null	Primary Tumor	notreported	21107	dead	null	1324.0	null	1324.0	null	null	020510a4-78b5-5290-a377-54a07c066478	c56.9	notreported	-21107	notreported	notreported
THCA	c73	female	stagei	nothispanicorlatino	white	THCA_unc.edu.7e2bfc91-acab-4170-81e1-a8e37d09a112.1655197.rsem.isoforms.results	1f3915cb-718c-42ae-ab0a-ce62b8664995	c73.9	1980	null	null	null	null	null	null	null	Primary Tumor	notreported	10266	alive	null	null	null	1614.0	null	null	982948ee-256e-5d37-9c51-ff380c081116	c73.9	notreported	-10266	notreported	notreported
OV	c56.9	female	notreported	nothispanicorlatino	white	OV_unc.edu.a391b870-b6fb-4ca8-b425-2331fceae442.1527166.rsem.isoforms.results	512de609-757b-42be-8b30-c414f71af422	c56.9	1955	null	null	null	null	null	null	null	Primary Tumor	notreported	18788	dead	null	36.0	null	null	null	null	ff9cb7c9-66ac-5907-9329-78183e6e5040	c56.9	notreported	-18788	notreported	notreported
BLCA	c67.2	male	stageiv	nothispanicorlatino	white	BLCA_unc.edu.6f82f237-061e-47ae-a3fa-d03b6aeb1c1b.2508511.rsem.isoforms.results	3bd918a8-3b92-4042-b4a1-f9dfcd6fe405	c67.2	null	0.273972602739726	109.0	null	null	0.0031848064280496713	null	185.0	Primary Tumor	notreported	28470	alive	null	null	null	117.0	null	null	802d8019-c4b5-5649-b94c-47d9ef9bded0	c67.2	notreported	-28470	notreported	notreported
THCA	c73	female	stagei	nothispanicorlatino	white	THCA_unc.edu.14f1d95e-473a-4b72-9ba2-8a1e3e3a0d5e.1280998.rsem.isoforms.results	1005ccb2-10ef-4e37-950e-ad72393db03c	c73.9	1971	null	null	null	null	null	null	null	Primary Tumor	notreported	13786	alive	null	null	null	2485.0	null	null	64fb24a4-cb6f-5fb5-8b9b-d6c330d38582	c73.9	notreported	-13786	notreported	notreported
BLCA	c67.9	male	stageiii	nothispanicorlatino	white	BLCA_unc.edu.652f8ab9-33b6-4e10-a84e-1e1b1ef0b707.1326733.rsem.isoforms.results	74cbb078-9aae-422a-a7af-dd29ebca949e	c67.9	1966	null	81.0	null	null	0.0027379664683612765	null	172.0	Primary Tumor	notreported	16504	dead	null	630.0	null	68.0	null	null	0a7550d5-165b-5e74-bcde-6d72098ab14c	c67.9	notreported	-16504	notreported	notreported
OV	c56.9	female	notreported	notreported	asian	OV_unc.edu.ff781a4f-7281-4195-880f-3df099a401cc.1519229.rsem.isoforms.results	eeb9d147-608d-4692-8adf-2f601d23a8ff	c56.9	1959	null	null	null	null	null	null	null	Primary Tumor	notreported	17847	alive	null	null	null	686.0	null	null	c26a3c0e-765f-5b6f-be27-9e886aeaad31	c56.9	notreported	-17847	notreported	notreported
THCA	c73	female	stagei	nothispanicorlatino	blackorafricanamerican	THCA_unc.edu.1094851a-de93-4efd-9483-83a36189a0bc.2545942.rsem.isoforms.results	9efd27c7-9893-49fd-886e-e85057dd5d2e	c73.9	1978	null	null	null	null	null	null	null	Primary Tumor	notreported	12493	alive	null	null	null	447.0	null	null	8f3b6384-262b-5452-8d04-49da7b4cd187	c73.9	notreported	-12493	notreported	notreported
LGG	c71.0	female	notreported	nothispanicorlatino	white	LGG_unc.edu.05511b6c-4529-4081-a8aa-aeed061c5159.2269823.rsem.isoforms.results	e661e157-c6bc-4024-9905-97954759aad6	c71.0	1969	null	null	null	null	null	null	null	Primary Tumor	notreported	16161	alive	null	null	null	72.0	null	null	6c1adaf5-2825-5420-a6a2-9260e5cacc74	c71.0	notreported	-16161	notreported	notreported
BLCA	c67.9	female	stageii	nothispanicorlatino	white	BLCA_unc.edu.80b2573f-d8e0-4d0d-84a6-301c5103267d.1469188.rsem.isoforms.results	2a41b7d4-132f-4fb6-87b5-487c445379c7	c67.9	1957	0.958904109589041	78.0	null	null	0.002972107910379515	null	162.0	Primary Tumor	notreported	19776	alive	null	null	null	638.0	null	null	171dde1e-3ad5-52ed-a32c-fba1e007ed0f	c67.9	notreported	-19776	notreported	notreported
LGG	c71.0	female	notreported	nothispanicorlatino	white	LGG_unc.edu.413a35b5-9151-44ca-85af-543683c8194b.2309407.rsem.isoforms.results	033c1f48-9225-4159-b23b-7042272877da	c71.0	1968	null	null	null	null	null	null	null	Primary Tumor	notreported	15178	alive	null	null	null	1989.0	null	null	9b887204-7b60-581e-8e43-b6b20460f907	c71.0	notreported	-15178	notreported	notreported
THCA	c73	female	stagei	nothispanicorlatino	white	THCA_unc.edu.6f0967e7-b8ab-42d8-aabb-77d59c54eb74.1662295.rsem.isoforms.results	b30f5b13-8cc9-48a0-93ea-3d49ce8a7d0d	c73.9	1978	null	null	null	null	null	null	null	Primary Tumor	notreported	11735	alive	null	null	null	942.0	null	null	60014de8-25d1-5aa1-94b0-7defc51a7394	c73.9	notreported	-11735	notreported	notreported
LGG	c71.0	male	notreported	hispanicorlatino	blackorafricanamerican	LGG_unc.edu.2797760a-c82d-44d8-bec2-92fe1d6ef271.2325747.rsem.isoforms.results	6ef2d9ab-f72e-48cf-92b8-f3159d28160c	c71.0	1974	null	null	null	null	null	null	null	Primary Tumor	notreported	14524	alive	null	null	null	486.0	null	null	b59e6236-22b4-529d-a4c9-60e91bbb1077	c71.0	notreported	-14524	notreported	notreported
THCA	c73	female	stagei	notreported	white	THCA_unc.edu.9efc9346-8524-4935-ae3f-a953d7e58e3f.1651941.rsem.isoforms.results	754866ea-d5ca-451a-98e4-6e0c430d3652	c73.9	1955	null	null	null	null	null	null	null	Solid Tissue Normal	notreported	17196	alive	null	null	null	486.0	null	null	36a7f750-444e-587d-bb69-b152092692c9	c73.9	notreported	-17196	notreported	notreported
BLCA	c67.9	male	stageiv	notreported	white	BLCA_unc.edu.381b51af-d1f7-41db-a69e-49d681b3ef39.1114359.rsem.isoforms.results	9c274536-3ca1-4f0e-93a8-1688074d862f	c67.9	1955	3.287671232876712	97.91	null	null	0.003271409001303084	null	173.0	Primary Tumor	notreported	19554	alive	null	null	null	2020.0	null	null	e6152499-4c74-57ad-96f8-6f5675b3f06f	c67.9	notreported	-19554	notreported	notreported
BLCA	c67.9	male	stageiv	nothispanicorlatino	white	BLCA_unc.edu.c5f00487-d24a-46fc-9f15-f7fc22e28e0b.2545670.rsem.isoforms.results	51fdb034-5d05-427b-b6b8-b6eecd65d976	c67.9	1935	3.0136986301369864	89.0	null	null	0.002906122448979592	null	175.0	Primary Tumor	notreported	25460	dead	null	2020.0	null	null	null	null	a482f699-6d40-5b24-b032-72a51bb0ec6f	c67.9	notreported	-25460	notreported	notreported
LGG	c71.9	female	notreported	nothispanicorlatino	blackorafricanamerican	LGG_unc.edu.0d0edd5c-226b-4dae-a881-24dba9d3caab.2403467.rsem.isoforms.results	48607130-c09a-491d-882f-7d2591d13182	c71.9	1966	null	null	null	null	null	null	null	Recurrent Tumor	notreported	15986	alive	null	null	null	532.0	null	null	66d7d6e6-b406-5ce8-b499-4d2840b532cc	c71.9	notreported	-15986	notreported	notreported
LGG	c71.0	female	notreported	nothispanicorlatino	white	LGG_unc.edu.cc2965b7-e059-4cf7-8f10-133903d70a4c.2308599.rsem.isoforms.results	a3822b5e-d794-4126-b31f-c70e1cc47f22	c71.0	1975	null	null	null	null	null	null	null	Primary Tumor	notreported	14152	alive	null	null	null	292.0	null	null	4c083e0e-7016-5b64-ac5c-6ee60d980aad	c71.0	notreported	-14152	notreported	notreported
BLCA	c67.2	male	stageiii	notreported	white	BLCA_unc.edu.4cab604d-59f6-46d2-8c35-d3416977e313.2504834.rsem.isoforms.results	1ecfdf16-f5e9-4a08-8834-37f4b474179d	c67.2	1948	0.547945205479452	69.0	null	null	0.0020380434782608695	null	184.0	Primary Tumor	notreported	23817	alive	null	null	null	495.0	null	null	915c1c6d-1c45-5300-9d0a-2c52c29ba1eb	c67.2	notreported	-23817	notreported	notreported
BLCA	c67.2	male	stageiii	nothispanicorlatino	white	BLCA_unc.edu.8038ffb4-38d5-437a-9457-4943c0202a8a.2307638.rsem.isoforms.results	389d1e21-5b97-4231-a3d7-71fecb918beb	c67.2	1930	1.643835616438356	62.0	null	null	0.0021453287197231836	null	170.0	Primary Tumor	notreported	30185	alive	null	null	null	572.0	null	null	b0c19479-dba8-50b7-b551-d23c83a6c272	c67.2	notreported	-30185	notreported	notreported
LGG	c71.0	male	notreported	nothispanicorlatino	white	LGG_unc.edu.1bb006de-b90b-43fe-8f1e-2357faf7c73f.1376603.rsem.isoforms.results	1937318f-a1bb-4f48-b8ec-4aadd406e52a	c71.0	1927	null	null	null	null	null	null	null	Primary Tumor	notreported	24282	dead	null	1585.0	null	null	null	null	9b4bef07-21a4-54de-a8df-99086ff1164b	c71.0	notreported	-24282	notreported	notreported
OV	c56.9	female	notreported	nothispanicorlatino	white	OV_unc.edu.2d0702a8-bf85-458e-879c-ebc03a2aa3d1.1562719.rsem.isoforms.results	6746533a-8d0b-4ebc-87ec-49c8738121a8	c56.9	1918	null	null	null	null	null	null	null	Primary Tumor	notreported	29262	dead	null	887.0	null	null	null	null	42b4a2fe-7c3d-5839-b189-e22b4b061c28	c56.9	notreported	-29262	notreported	notreported
THCA	c73	male	stageiii	nothispanicorlatino	white	THCA_unc.edu.3b52da51-036d-4ae5-9ddf-99b67495a1cc.1325146.rsem.isoforms.results	fd661b1b-fe0b-4ab0-ae82-76324e2f6a81	c73.9	1911	null	null	null	null	null	null	null	Primary Tumor	notreported	32146	dead	null	2973.0	null	null	null	null	73d5830c-db9d-5286-be03-f885a51e2756	c73.9	notreported	-32146	notreported	notreported
THCA	c73	female	stageii	nothispanicorlatino	white	THCA_unc.edu.d0b1f7b1-c604-46a9-b2e3-fd4285e56c8c.1666808.rsem.isoforms.results	315cbbe8-62c8-488b-92c5-e2046321efb7	c73.9	1930	null	null	null	null	null	null	null	Primary Tumor	notreported	28783	alive	null	null	null	1862.0	null	null	11088681-747c-5e48-a35b-e2dcef8a520c	c73.9	notreported	-28783	notreported	notreported
OV	c56.9	female	notreported	notreported	white	OV_unc.edu.c334b353-0652-49fb-8cd6-5bcf8485e5d0.1523383.rsem.isoforms.results	5d7027f5-60a0-47ab-a79d-667c9acc0e54	c56.9	1945	null	null	null	null	null	null	null	Primary Tumor	notreported	20785	dead	null	1163.0	null	1163.0	null	null	661d13d0-4961-5a39-bd67-d1665dda7bc5	c56.9	notreported	-20785	notreported	notreported
OV	c56.9	female	notreported	notreported	white	OV_unc.edu.54b75801-ad36-49a1-b0c2-edc0053b897e.1549137.rsem.isoforms.results	d2c0d320-d1c5-4eed-af4f-15540e60db0b	c56.9	1945	null	null	null	null	null	null	null	Primary Tumor	notreported	19537	dead	null	1189.0	null	null	null	null	0bf0b7d6-59fd-5d2e-b753-857c4b618889	c56.9	notreported	-19537	notreported	notreported
LGG	c71.0	male	notreported	nothispanicorlatino	white	LGG_unc.edu.e6ae4f3a-a375-424d-8f22-b07d1b4904ef.2339859.rsem.isoforms.results	fc3948fb-df27-4149-bbfb-04443dfecc19	c71.0	1954	null	null	null	null	null	null	null	Primary Tumor	notreported	15345	dead	null	23.0	null	null	null	null	2bf93f76-741f-5d39-81c6-17db692d53de	c71.0	notreported	-15345	notreported	notreported
LGG	c71.0	female	notreported	nothispanicorlatino	white	LGG_unc.edu.e42fd909-d0b3-4b6d-8b2b-008ad7b7945c.1413126.rsem.isoforms.results	0b54cda4-7568-481e-b0c6-2c5c6de0026c	c71.0	1969	null	null	null	null	null	null	null	Primary Tumor	notreported	13680	alive	null	null	null	2289.0	null	null	6dcec3e7-ebd8-53e3-a2d4-70b5996e7d02	c71.0	notreported	-13680	notreported	notreported
THCA	c73	male	stagei	nothispanicorlatino	white	THCA_unc.edu.e6d254f4-3c38-4faa-8cc3-253b87bd643a.1348303.rsem.isoforms.results	acb3b9db-16e9-40f5-87a9-9df9d4ceee54	c73.9	1981	null	null	null	null	null	null	null	Primary Tumor	notreported	10832	alive	null	null	null	1563.0	null	null	a9ba7c4e-d3c1-5b58-b585-6c11ea39fb63	c73.9	notreported	-10832	notreported	notreported
LGG	c71.0	male	notreported	nothispanicorlatino	white	LGG_unc.edu.7fcd4e64-e758-4418-b19e-02a4e7ee1fef.1665962.rsem.isoforms.results	f97a9afe-e54a-4ef0-b458-0c77f938552e	c71.0	1960	null	null	null	null	null	null	null	Primary Tumor	notreported	18735	alive	null	null	null	651.0	null	null	7ad6dc97-1b58-565d-880e-96af94703d8b	c71.0	notreported	-18735	notreported	notreported
BLCA	c67.9	female	stageii	nothispanicorlatino	blackorafricanamerican	BLCA_unc.edu.1330c062-9641-4d39-a09f-18aebaa90550.2484469.rsem.isoforms.results	fa2410b1-4f69-446d-99ee-a10a00034c42	c67.9	null	null	null	null	null	null	null	null	Primary Tumor	notreported	24588	alive	null	null	null	3432.0	null	null	c8ee59df-dc15-52b5-8c51-2426d73c1152	c67.9	notreported	-24588	notreported	notreported
GBM	null	null	null	null	null	GBM_unc.edu.bbd74b84-fee5-45ee-9b76-b84d54a42a08.2403843.rsem.isoforms.results	null	null	null	null	null	null	null	null	null	null	Solid Tissue Normal	null	null	null	null	null	null	null	null	null	null	null	null	null	null	null
OV	c56.9	female	notreported	nothispanicorlatino	americanindianoralaskanative	OV_unc.edu.05ab6bb9-0cb1-47f1-8dd2-92a48239e82e.1552862.rsem.isoforms.results	22178c3c-6b04-46d8-8041-dc83fa195029	c56.9	1967	null	null	null	null	null	null	null	Primary Tumor	notreported	14184	dead	null	883.0	null	883.0	null	null	8a61260e-5e20-5dc5-94bf-549afb0dbbd8	c56.9	notreported	-14184	notreported	notreported
THCA	c73	female	stagei	hispanicorlatino	white	THCA_unc.edu.752db3dc-92ba-4a16-a8d0-41ce260cef62.1324526.rsem.isoforms.results	aa528913-cbbc-4e1d-b6d0-87f6a46bcbc9	c73.9	1977	null	null	null	null	null	null	null	Primary Tumor	notreported	11604	alive	null	null	null	1973.0	null	null	48f0cff9-e476-53de-8236-0b045c72860c	c73.9	notreported	-11604	notreported	notreported
OV	c56.9	female	notreported	notreported	white	OV_unc.edu.53a60e9f-3541-4fe7-a7ea-87ee888c0446.1549367.rsem.isoforms.results	a36a4440-15ef-4837-904b-380a964d16f1	c56.9	1945	null	null	null	null	null	null	null	Primary Tumor	notreported	23542	alive	null	null	null	113.0	null	null	250e6c30-98ff-51b3-bc1f-cb87719b253c	c56.9	notreported	-23542	notreported	notreported
LGG	c71.0	female	notreported	nothispanicorlatino	white	LGG_unc.edu.c44e9cfc-d595-4098-b55b-8275d7284f05.2402646.rsem.isoforms.results	739cc9f1-71be-4f81-a5d1-eda673903e45	c71.0	1966	null	null	null	null	null	null	null	Primary Tumor	notreported	16911	alive	null	null	null	939.0	null	null	f216443a-99e9-5f83-8d9c-e95d9e8c4708	c71.0	notreported	-16911	notreported	notreported
BLCA	c67.1	male	stageiv	nothispanicorlatino	white	BLCA_unc.edu.ccc6510d-4ef3-4471-8fd1-e240fe55d95c.2504559.rsem.isoforms.results	cbe6c328-f7e1-44b2-b4e5-b495f46a7fb7	c67.1	1962	40.0	115.0	null	null	0.003798388162240719	null	174.0	Primary Tumor	notreported	17635	dead	null	1163.0	null	null	null	null	7665b531-8a55-51c3-82a7-256f4bbefec2	c67.1	notreported	-17635	notreported	notreported
OV	c56.9	female	notreported	notreported	white	OV_unc.edu.6d1d8c8a-fea0-4a47-bd2a-124270561406.1566165.rsem.isoforms.results	fe0e3851-d8cb-4533-9536-b4826cd25f87	c56.9	1947	null	null	null	null	null	null	null	Primary Tumor	notreported	21130	dead	null	1106.0	null	16.0	null	null	1bd094f3-6920-5234-b706-e5a90b2cdf6c	c56.9	notreported	-21130	notreported	notreported
LGG	c71.0	male	notreported	nothispanicorlatino	white	LGG_unc.edu.0eb7a942-eea5-4de3-add4-724f69a6f80c.2332449.rsem.isoforms.results	457ec7f6-8612-4641-aaef-8a7f2c44c30c	c71.0	1941	null	null	null	null	null	null	null	Primary Tumor	notreported	21020	dead	null	435.0	null	null	null	null	962facb0-4ee4-539f-b25d-2f37b7cee3b2	c71.0	notreported	-21020	notreported	notreported
OV	c56.9	female	notreported	nothispanicorlatino	white	OV_unc.edu.8f0f34fb-bbef-4a17-8324-4ebda56f9e0e.1528124.rsem.isoforms.results	914d8613-3c25-4a10-be50-28b42f4d3a5d	c56.9	1927	null	null	null	null	null	null	null	Primary Tumor	notreported	26786	dead	null	1977.0	null	1977.0	null	null	db3baf3d-297f-5c6c-a175-b0c27145f449	c56.9	notreported	-26786	notreported	notreported
THCA	c73	female	stagei	nothispanicorlatino	white	THCA_unc.edu.4f87793c-9697-46ac-80b5-079c7db1f12b.1363812.rsem.isoforms.results	c951b786-7de3-4195-85b9-c4c19e95f546	c73.9	1970	null	null	null	null	null	null	null	Primary Tumor	notreported	13718	alive	null	null	null	2418.0	null	null	b83662b3-aaaf-55af-a149-e0fc4cf51f97	c73.9	notreported	-13718	notreported	notreported
GBM	c71.9	male	notreported	nothispanicorlatino	asian	GBM_unc.edu.2ee686c6-da57-4371-90a9-db02ab6cb278.1544163.rsem.isoforms.results	c7b4fd72-b45d-4524-8424-983120abfec0	c71.9	1950	null	null	null	null	null	null	null	Primary Tumor	notreported	21559	dead	null	506.0	null	207.0	null	null	76090487-2bf4-5ec5-b877-4c60d5c68a65	c71.9	notreported	-21559	notreported	notreported
BLCA	c67.0	male	stageiii	nothispanicorlatino	white	BLCA_unc.edu.c87fa518-41c5-417a-88ac-0b300f1a8732.2231945.rsem.isoforms.results	6f30b069-c8f5-424c-9fb5-f7dba508cb8b	c67.0	1940	null	110.0	null	null	0.0036753650305723544	null	173.0	Primary Tumor	notreported	27000	alive	null	null	null	28.0	null	null	1db2c719-b22c-54bb-809a-1a64f7fd1b17	c67.0	notreported	-27000	notreported	notreported
THCA	c73	female	stagei	notreported	notreported	THCA_unc.edu.f39fc113-7955-4dc6-989b-17614c53ea20.1919236.rsem.isoforms.results	ca625067-1c6d-45c7-b752-af40c8327ea5	c73.9	1986	null	null	null	null	null	null	null	Primary Tumor	notreported	9844	alive	null	null	null	416.0	null	null	1fdaca35-9692-566f-901a-be9cef8e6c4e	c73.9	notreported	-9844	notreported	notreported
GBM	c71.9	male	notreported	nothispanicorlatino	white	GBM_unc.edu.47fbba7a-4914-4bcd-9fea-7ebb84fb4b47.1543800.rsem.isoforms.results	0456a66b-c9b3-4eb1-9872-424a7ea712a2	c71.9	1965	null	null	null	null	null	null	null	Primary Tumor	notreported	16018	dead	null	28.0	null	28.0	null	null	33c95b39-c25a-5d6d-9a0f-031c197fb640	c71.9	notreported	-16018	notreported	notreported
BLCA	c67.9	male	stageii	nothispanicorlatino	white	BLCA_unc.edu.d6280a13-a376-4ede-8aab-7a7633cb3b9e.2233413.rsem.isoforms.results	e7680a8e-1c0e-426b-abd8-d0d8e7d0e5aa	c67.9	1951	null	102.0	null	null	0.0033306122448979593	null	175.0	Primary Tumor	notreported	22774	alive	null	null	null	480.0	null	null	def0c4d2-8808-5844-afda-1cfe778ea1cf	c67.9	notreported	-22774	notreported	notreported
BLCA	c67.2	male	stageiv	nothispanicorlatino	white	BLCA_unc.edu.ae3c4446-cb58-4b5b-9eb8-6c81e1bf4535.1474930.rsem.isoforms.results	474582f2-8dec-4fbc-803f-4fd9ba2e0957	c67.2	1941	4.383561643835616	98.0	null	null	0.0027727478497057492	null	188.0	Primary Tumor	notreported	25852	dead	null	547.0	null	186.0	null	null	fbc6b16f-ff52-5ed2-aeae-c1848ec825d4	c67.2	notreported	-25852	notreported	notreported
BLCA	c67.0	female	stageiv	nothispanicorlatino	white	BLCA_unc.edu.9846d55d-971d-4e69-b6ea-ce8c48cafede.1213880.rsem.isoforms.results	f8780a4b-7f55-41d1-bf92-8513955d150e	c67.0	1927	null	null	null	null	null	null	null	Solid Tissue Normal	notreported	28987	dead	null	154.0	null	null	null	null	fe910470-54ec-5a10-acba-f1aa4b14186c	c67.0	notreported	-28987	notreported	notreported
OV	c56.9	female	notreported	notreported	white	OV_unc.edu.eb2322dd-5a7f-41c0-9be2-7e1f7dc485b4.1519151.rsem.isoforms.results	60014a6e-6a13-4f92-bbfd-eeeee9632f98	c56.9	1948	null	null	null	null	null	null	null	Primary Tumor	notreported	21147	alive	null	null	null	547.0	null	null	35db92e7-eaa8-5d22-ba3a-cde96978732d	c56.9	notreported	-21147	notreported	notreported
LGG	c71.0	female	notreported	nothispanicorlatino	white	LGG_unc.edu.c0a8b929-166d-4227-a0e1-fe8ab8abac11.1642947.rsem.isoforms.results	083c0b78-88c2-4ec1-8a81-a0792b16e2cc	c71.0	1953	null	null	null	null	null	null	null	Primary Tumor	notreported	20558	alive	null	null	null	748.0	null	null	16294ed8-9f5b-5954-a60d-c43dfd54aea4	c71.0	notreported	-20558	notreported	notreported
OV	c56.9	female	notreported	nothispanicorlatino	asian	OV_unc.edu.658b4847-33bc-414c-a2bb-ce9379ef57bd.1564751.rsem.isoforms.results	7d03ddb6-f3fe-4b50-8bba-514aa65e7d0e	c56.9	1932	null	null	null	null	null	null	null	Primary Tumor	notreported	28231	alive	null	null	null	186.0	null	null	44bb6d41-522c-5051-b9a5-d0fb8e4f3d93	c56.9	notreported	-28231	notreported	notreported
BLCA	c67.2	male	stageii	nothispanicorlatino	white	BLCA_unc.edu.b6ebbe90-feb4-4e8e-9408-031db2297c1c.2157364.rsem.isoforms.results	73bc18a4-3600-409e-a2b5-e09e2b3f040d	c67.2	1946	1.095890410958904	79.0	null	null	0.0028326580372189753	null	167.0	Primary Tumor	notreported	22439	alive	null	null	null	2330.0	null	null	1fc0499f-9f4b-5b63-aeb7-f893a147d6a4	c67.2	notreported	-22439	notreported	notreported
BLCA	c67.4	male	stageiv	nothispanicorlatino	white	BLCA_unc.edu.8612349c-596c-4938-92c8-79b8919f5bd6.2538573.rsem.isoforms.results	24d56331-4bca-4ab8-9fb7-a95a30b4c8fe	c67.4	1948	3.3972602739726026	84.0	null	null	0.002681221871109834	null	177.0	Primary Tumor	notreported	23971	alive	null	null	null	372.0	null	null	36d5ac1b-f770-5170-ad27-f6886f2c010c	c67.4	notreported	-23971	notreported	notreported
OV	c56.9	female	notreported	notreported	white	OV_unc.edu.bca48aa6-25bc-49e4-8bb5-edf38362b4a8.1520175.rsem.isoforms.results	7dcc809b-e33a-4453-b92a-c00786f48cb0	c56.9	1951	null	null	null	null	null	null	null	Primary Tumor	notreported	17943	dead	null	1213.0	null	1213.0	null	null	017a1126-1b80-5060-b971-d27b20147a99	c56.9	notreported	-17943	notreported	notreported
THCA	c73	female	stagei	nothispanicorlatino	white	THCA_unc.edu.39ddcdd4-520a-4039-9838-4c0456cc5223.1566743.rsem.isoforms.results	cd1656d8-55a5-4248-b81d-fed9d5992cbe	c73.9	1977	null	null	null	null	null	null	null	Primary Tumor	notreported	12677	alive	null	null	null	542.0	null	null	6243109d-418f-5c95-9aa4-45b1f2ee3d45	c73.9	notreported	-12677	notreported	notreported
THCA	c73	female	stageiii	nothispanicorlatino	white	THCA_unc.edu.ee052957-28e2-4192-b54d-b7c877594ece.1656982.rsem.isoforms.results	3bfa52af-cb40-45d8-9bdc-591985aae7fb	c73.9	1929	null	null	null	null	null	null	null	Solid Tissue Normal	notreported	28924	alive	null	null	null	2211.0	null	null	a5f9196f-ddec-55b9-959b-b627193db01c	c73.9	notreported	-28924	notreported	notreported
BLCA	c67.9	male	stageii	nothispanicorlatino	white	BLCA_unc.edu.4000adba-115e-40bf-afbb-35ad20c4e416.1217876.rsem.isoforms.results	2a142731-119c-495d-ad30-eb0b48bacb46	c67.9	1957	1.917808219178082	73.0	null	null	0.0024475872657063855	null	172.7	Primary Tumor	notreported	18467	alive	null	null	null	1884.0	null	null	dd92c267-39d0-5fa5-a221-cce0a5f755e7	c67.9	notreported	-18467	notreported	notreported
LGG	c71.0	male	notreported	nothispanicorlatino	white	LGG_unc.edu.d48e6a92-05f9-4400-828c-e3fdb17c99ac.2409132.rsem.isoforms.results	732df38e-d32c-4d63-ac97-ad655e2e5732	c71.0	1963	null	null	null	null	null	null	null	Primary Tumor	notreported	null	alive	null	null	null	1553.0	null	null	63f533e2-893c-5b51-a277-2f5873497845	c71.0	notreported	null	notreported	notreported
THCA	c73	female	stageiii	nothispanicorlatino	white	THCA_unc.edu.7f385a18-a567-4386-99b8-4f54f13d325e.1246747.rsem.isoforms.results	e61fb24b-613a-4b6d-bb2b-00ccedbd3dbc	c73.9	1957	null	null	null	null	null	null	null	Primary Tumor	notreported	19927	alive	null	null	null	517.0	null	null	66683a52-a354-5927-a591-96163bb48352	c73.9	notreported	-19927	notreported	notreported
BLCA	c67.0	male	stageiv	notreported	white	BLCA_unc.edu.88cb8b2c-9d76-4b91-bbca-5e62e251e3d6.2545082.rsem.isoforms.results	604c0d60-6ba9-4d2f-98db-e310c58bc8ca	c67.0	1951	2.191780821917808	93.0	null	null	0.0031435911303407246	null	172.0	Primary Tumor	notreported	22271	alive	null	null	null	902.0	null	null	c9c1169c-c203-5ee9-8341-8fddabe40e64	c67.0	notreported	-22271	notreported	notreported
LGG	c71.0	male	notreported	nothispanicorlatino	white	LGG_unc.edu.f68cffac-4db9-470c-b726-01fb876a381a.1816343.rsem.isoforms.results	975c76cd-f88a-4d88-93a4-fbf2cb9e2e3b	c71.0	1979	null	null	null	null	null	null	null	Primary Tumor	notreported	11810	alive	null	null	null	7.0	null	null	1678bafb-291f-5d32-b4be-40aa5d7cc9f6	c71.0	notreported	-11810	notreported	notreported
LGG	c71.0	male	notreported	hispanicorlatino	white	LGG_unc.edu.707a0918-ae88-4c3c-9a94-e9fad5cdbc7b.2401895.rsem.isoforms.results	2f8c789e-bbd8-4753-a48b-6894c21162f8	c71.0	1981	null	null	null	null	null	null	null	Recurrent Tumor	notreported	10742	alive	null	null	null	1341.0	null	null	53c3462f-21cf-5e51-a578-53b8ccd41b12	c71.0	notreported	-10742	notreported	notreported
THCA	c73	female	stageii	notreported	notreported	THCA_unc.edu.0d43a86d-9356-426a-94dc-4448bd6820b8.1918880.rsem.isoforms.results	212b2002-1ebf-47dd-82f8-6c0b904cf909	c73.9	1965	null	null	null	null	null	null	null	Primary Tumor	notreported	16807	alive	null	null	null	415.0	null	null	19e2d687-0e1d-555e-b1c2-cc302188d6a0	c73.9	notreported	-16807	notreported	notreported
THCA	c73	female	stageiv	nothispanicorlatino	white	THCA_unc.edu.a8ae9773-3287-43e4-a18a-1ace7291e83f.1658114.rsem.isoforms.results	8a233b01-2959-467f-8950-02be16309156	c73.9	1936	null	null	null	null	null	null	null	Primary Tumor	notreported	25484	dead	null	174.0	null	null	null	null	f5788146-f077-5f0c-aab3-7cd6bb5562e0	c73.9	notreported	-25484	notreported	notreported
LGG	c71.9	female	notreported	nothispanicorlatino	white	LGG_unc.edu.20108871-61a3-4160-8a9d-c5e4481143a6.1569255.rsem.isoforms.results	ae081e4a-efa9-4b52-b15e-29085c0612d3	c71.9	1971	null	null	null	null	null	null	null	Primary Tumor	notreported	14375	alive	null	null	null	1469.0	null	null	8b8b3047-eacd-59e7-ab87-042118e07788	c71.9	notreported	-14375	notreported	notreported
OV	c56.9	female	notreported	hispanicorlatino	white	OV_unc.edu.1b8eed7b-173e-4e38-80a4-a3a0aea469a1.1560425.rsem.isoforms.results	563853a2-9ac2-48be-adf3-1e547ee2b274	c56.9	1944	null	null	null	null	null	null	null	Primary Tumor	notreported	21406	dead	null	1366.0	null	1366.0	null	null	770910a1-1949-574d-a201-4d4ada40e373	c56.9	notreported	-21406	notreported	notreported
THCA	c73	male	stageiii	nothispanicorlatino	white	THCA_unc.edu.3fbcb5f7-24d9-4093-a34e-1fc6f83c7d3b.1664564.rsem.isoforms.results	4cccc34b-daf6-41ca-9bf8-f1614525eac9	c73.9	1959	null	null	null	null	null	null	null	Solid Tissue Normal	notreported	19007	alive	null	null	null	567.0	null	null	b762b1ca-17d1-5541-b518-ace23355a505	c73.9	notreported	-19007	notreported	notreported
THCA	c73	female	stagei	nothispanicorlatino	white	THCA_unc.edu.9f7b5c34-9a3c-4a6f-a8f2-65da0e6de5b9.1458511.rsem.isoforms.results	2fa2dd09-593a-4cde-97c7-61cdb8ba2bfe	c73.9	1967	null	null	null	null	null	null	null	Primary Tumor	notreported	12665	alive	null	null	null	4258.0	null	null	1ee7ecdb-421f-5be9-b264-dccd4cfd2c57	c73.9	notreported	-12665	notreported	notreported
BLCA	c67.2	male	notreported	nothispanicorlatino	white	BLCA_unc.edu.83c4827f-742b-42bf-96d0-335b484ee724.1966770.rsem.isoforms.results	72ff655f-bb08-40ed-b4c3-e9497d4da108	c67.2	1940	0.7123287671232876	105.0	null	null	0.003135357878706441	null	183.0	Primary Tumor	notreported	26515	dead	null	385.0	null	217.0	null	null	e87917cd-61ac-5c27-b9e1-e076cedb1245	c67.2	notreported	-26515	notreported	notreported
OV	c56.9	female	notreported	notreported	blackorafricanamerican	OV_unc.edu.1ca9af90-a8db-4f7e-b17a-0bf32fed98c7.1562451.rsem.isoforms.results	72c40fba-f502-489b-ad87-843f52655894	c56.9	1945	null	null	null	null	null	null	null	Primary Tumor	notreported	21965	dead	null	1089.0	null	1089.0	null	null	5ab9e1b0-8ef3-58e0-9d0d-da2727fd5dc1	c56.9	notreported	-21965	notreported	notreported
LGG	c71.9	male	notreported	nothispanicorlatino	white	LGG_unc.edu.e1ecb6d0-8ceb-46b8-9959-86f8d53b0882.1376062.rsem.isoforms.results	5af8ada5-86b5-4832-8a8e-e975ecca5515	c71.9	1962	null	null	null	null	null	null	null	Primary Tumor	notreported	17663	alive	null	null	null	443.0	null	null	fd8d6a6d-6338-594a-afae-79723751a004	c71.9	notreported	-17663	notreported	notreported
THCA	c73	female	stagei	notreported	notreported	THCA_unc.edu.1156c53c-c2f9-48f5-a237-10e6416587fd.1327675.rsem.isoforms.results	47bde6dd-fa41-4d1b-8b20-2a5a5cdb2769	c73.9	1949	null	null	null	null	null	null	null	Primary Tumor	notreported	22911	alive	null	null	null	477.0	null	null	734a191c-8f2b-5b74-b4a4-1eb6fce261c5	c73.9	notreported	-22911	notreported	notreported
OV	c56.9	female	notreported	nothispanicorlatino	white	OV_unc.edu.759060d9-af2e-4098-b4ee-7aa2214acba8.1535754.rsem.isoforms.results	867f9563-16c9-45a8-b519-6df61ba1b6b7	c56.9	1943	null	null	null	null	null	null	null	Primary Tumor	notreported	21246	dead	null	2717.0	null	null	null	null	5b81cf5b-651e-5c5e-a09f-53be4eca5931	c56.9	notreported	-21246	notreported	notreported
THCA	c73	female	stageiva	nothispanicorlatino	white	THCA_unc.edu.a5aa7e8e-7a17-4ae0-9bb4-26201e45f914.1369333.rsem.isoforms.results	d84312e8-999d-49ad-b0aa-e48e87efc462	c73.9	1947	null	null	null	null	null	null	null	Primary Tumor	notreported	22108	alive	null	null	null	2665.0	null	null	b6bc9a9b-a2c6-5771-8daf-c016ae6e4cd8	c73.9	notreported	-22108	notreported	notreported
BLCA	c67.4	male	stageiv	nothispanicorlatino	white	BLCA_unc.edu.d692892d-d63b-4ac2-9627-ae255ab17cab.1474915.rsem.isoforms.results	4570b6e2-d430-41ca-aab1-ce4d14c36463	c67.4	1951	null	116.0	null	null	0.0034638239421899727	null	183.0	Primary Tumor	notreported	22020	dead	null	712.0	null	683.0	null	null	436d78eb-f26a-5f10-94ce-3dd51f75944a	c67.4	notreported	-22020	notreported	notreported
BLCA	c67.9	female	stageiv	nothispanicorlatino	white	BLCA_unc.edu.9bd649f6-9b08-4d26-87b9-a6901a00f2ba.2502963.rsem.isoforms.results	eed3908f-f1bd-4254-bca8-bc1a7427e95c	c67.9	1948	null	92.0	null	null	0.003259637188208617	null	168.0	Primary Tumor	notreported	21059	dead	null	544.0	null	null	null	null	7e731e8c-247d-51f2-aab7-b29760cbb170	c67.9	notreported	-21059	notreported	notreported
LGG	c71.0	female	notreported	notreported	notreported	LGG_unc.edu.f2249fe9-e838-4895-9e46-98fa8f30655e.2056202.rsem.isoforms.results	887def39-e212-490d-8849-2bc932fceff0	c71.0	1981	null	null	null	null	null	null	null	Primary Tumor	notreported	11637	alive	null	null	null	182.0	null	null	725b40d4-a9dd-51be-ba35-1bdc308f4b34	c71.0	notreported	-11637	notreported	notreported
LGG	c71.0	male	notreported	nothispanicorlatino	white	LGG_unc.edu.8d1c0907-a5f9-4fcb-a04a-d554e40c23d3.2038963.rsem.isoforms.results	699d3ba1-94c8-409f-90c3-e7fe2f1cf825	c71.0	1943	null	null	null	null	null	null	null	Primary Tumor	notreported	25726	alive	null	null	null	743.0	null	null	51a483ae-eb7f-504f-a7fa-39e363048971	c71.0	notreported	-25726	notreported	notreported
BLCA	c67.4	female	stageiii	nothispanicorlatino	white	BLCA_unc.edu.20da407e-268c-4a10-9d1f-751974e09067.2089836.rsem.isoforms.results	070c66fa-ef48-46cb-af4f-357d2c641118	c67.4	1948	null	104.0	null	null	0.0035986159169550174	null	170.0	Primary Tumor	notreported	22505	alive	null	null	null	1792.0	null	null	f2c6c5d3-6331-5211-91b8-286bb8987ab9	c67.4	notreported	-22505	notreported	notreported
THCA	c73	female	stageii	notreported	notreported	THCA_unc.edu.c49698bf-315a-4809-b88b-452765b455c6.1236330.rsem.isoforms.results	e632b443-cf6a-4592-96c6-c3493ec86fea	c73.9	1960	null	null	null	null	null	null	null	Primary Tumor	notreported	17297	alive	null	null	null	1645.0	null	null	5ea1c0e8-f4cf-56b8-8389-9215c628beaf	c73.9	notreported	-17297	notreported	notreported
BLCA	c67.4	male	stageiv	nothispanicorlatino	white	BLCA_unc.edu.f1e23b9a-a79f-439c-a4b9-58fbe9899e98.2096586.rsem.isoforms.results	10c825d7-4e21-43e7-ac95-dda75fbdaf74	c67.4	1942	3.1232876712328768	107.0	null	null	0.0034153659548660986	null	177.0	Primary Tumor	notreported	25625	alive	null	null	null	477.0	null	null	bd71cb46-0359-5087-9b0a-b70159111068	c67.4	notreported	-25625	notreported	notreported
THCA	c73	female	stageiii	nothispanicorlatino	white	THCA_unc.edu.d4c152fe-3931-47d0-8ed2-df40c8cd4cd0.1236788.rsem.isoforms.results	ab8c9101-adeb-4c43-a8bb-b089ebd711f6	c73.9	1947	null	null	null	null	null	null	null	Primary Tumor	notreported	23250	alive	null	null	null	509.0	null	null	61ff610e-1bff-5715-9345-0c3a19c17ff9	c73.9	notreported	-23250	notreported	notreported
BLCA	c67.9	male	stageiii	nothispanicorlatino	asian	BLCA_unc.edu.c11e3246-c33d-47ef-b4b4-be287b92d91e.1111913.rsem.isoforms.results	39ea19e1-4959-4f1b-9934-54bdaf766842	c67.9	1948	null	61.0	null	null	0.002061925365062196	null	172.0	Primary Tumor	notreported	22777	alive	null	null	null	389.0	null	null	1eae25f1-34e9-5dac-8e63-757b9d70f51a	c67.9	notreported	-22777	notreported	notreported
THCA	c73	female	stageiva	nothispanicorlatino	white	THCA_unc.edu.1efc2b34-1bb6-4a6e-993b-151d44f3b2ed.1653871.rsem.isoforms.results	f3665b89-957b-4d7b-b67f-39615c47d28b	c73.9	1954	null	null	null	null	null	null	null	Primary Tumor	notreported	20983	alive	null	null	null	951.0	null	null	b4a9ca9b-a372-5e2f-9f32-ca38af260944	c73.9	notreported	-20983	notreported	notreported
LGG	c71.0	male	notreported	nothispanicorlatino	white	LGG_unc.edu.3e7df498-0263-483e-98e8-e09324b5fae8.1665761.rsem.isoforms.results	4a7d4805-09e3-4044-9800-73239f4d66d4	c71.0	1948	null	null	null	null	null	null	null	Primary Tumor	notreported	22738	alive	null	null	null	1201.0	null	null	44b08882-e41e-5675-a0dc-52845405df9a	c71.0	notreported	-22738	notreported	notreported
LGG	c71.0	female	notreported	nothispanicorlatino	white	LGG_unc.edu.d6e91e40-d498-45eb-8cc7-e191c50f077e.2269448.rsem.isoforms.results	ed833be3-0e9b-4c9b-b6d5-1098f08265a0	c71.0	1955	null	null	null	null	null	null	null	Primary Tumor	notreported	21239	alive	null	null	null	497.0	null	null	0a9cdb1c-e827-5922-9854-212cbaecdc87	c71.0	notreported	-21239	notreported	notreported
GBM	c71.9	female	notreported	nothispanicorlatino	white	GBM_unc.edu.a0dfc338-c576-4a9c-8db3-3bbbcd5dc960.1539551.rsem.isoforms.results	de7b7cac-f094-4d59-8651-e991e34ea093	c71.9	1925	null	null	null	null	null	null	null	Primary Tumor	notreported	26600	dead	null	225.0	null	151.0	null	null	3bec1d61-648e-555d-8b5a-70f33f68871f	c71.9	notreported	-26600	notreported	notreported
GBM	c71.9	female	notreported	nothispanicorlatino	white	GBM_unc.edu.6f54bcd2-99e9-4f9b-a9b8-6963b922f783.1541444.rsem.isoforms.results	2b82e941-1b16-444e-af41-24dbc0a7e8b5	c71.9	1940	null	null	null	null	null	null	null	Primary Tumor	notreported	22865	dead	null	675.0	null	427.0	null	null	68c9b9cc-1887-5dbc-b246-5a67304931a6	c71.9	notreported	-22865	notreported	notreported
BLCA	c67.9	female	stageiv	nothispanicorlatino	white	BLCA_unc.edu.3add40ce-6d64-4ded-9ab6-2f076c420dc4.1112666.rsem.isoforms.results	f3104468-bf17-434b-8a7e-bc3b253121ea	c67.9	1926	null	65.3	null	null	0.002826350415512465	null	152.0	Primary Tumor	notreported	30914	alive	null	null	null	536.0	null	null	abdcdf80-9825-5987-b019-2fb07ec96c1b	c67.9	notreported	-30914	notreported	notreported
BLCA	c67.4	female	stageiii	nothispanicorlatino	white	BLCA_unc.edu.ac9729e9-6565-4e11-8828-ff43b752a5b6.2097391.rsem.isoforms.results	c1afc5eb-8c1d-4b6c-8453-48728fc023ba	c67.4	1932	1.643835616438356	71.0	null	null	0.002672287252060672	null	163.0	Primary Tumor	notreported	29247	alive	null	null	null	377.0	null	null	4ad80ea6-06f8-5d38-842e-8a4361a0fc25	c67.4	notreported	-29247	notreported	notreported
LGG	c71.0	female	notreported	hispanicorlatino	notreported	LGG_unc.edu.6589bdbc-b3a3-4949-8a08-3fd17952bf24.2056083.rsem.isoforms.results	67e9b426-72eb-4475-9689-eb75b22c4fd5	c71.0	1988	null	null	null	null	null	null	null	Primary Tumor	notreported	8947	alive	null	null	null	955.0	null	null	5c2ff82a-4c32-5a3d-b4bf-c98e1617dea9	c71.0	notreported	-8947	notreported	notreported
LGG	c71.0	male	notreported	nothispanicorlatino	white	LGG_unc.edu.cb18ceb5-73e7-44d7-8ab0-96b832e980bd.1673743.rsem.isoforms.results	9ee268a7-fa71-4f3f-919f-cf4ee1de2658	c71.0	1983	null	null	null	null	null	null	null	Primary Tumor	notreported	9667	alive	null	null	null	5.0	null	null	a9bc6391-9bf6-5ab5-bcd2-3d94483f0151	c71.0	notreported	-9667	notreported	notreported
BLCA	c67.9	male	stageii	nothispanicorlatino	white	BLCA_unc.edu.2a3b1b1a-9364-4bb2-beca-6933f88204c5.2507297.rsem.isoforms.results	cd10dc46-356a-420b-b3f5-9e4ed4e7ecab	c67.9	null	null	59.0	null	null	0.0023634033007530844	null	158.0	Primary Tumor	notreported	26654	alive	null	null	null	1561.0	null	null	09b7278a-5506-5709-a6d0-7313ad841245	c67.9	notreported	-26654	notreported	notreported
GBM	c71.9	female	notreported	notreported	white	GBM_unc.edu.fbf2f1c0-fb91-4548-8653-68021e6541f9.1532590.rsem.isoforms.results	b1c4579c-72fa-4974-830c-b6a81ace45f4	c71.9	1950	null	null	null	null	null	null	null	Primary Tumor	notreported	19090	dead	null	532.0	null	532.0	null	null	4d02ff30-d502-5a19-adc8-76f977469813	c71.9	notreported	-19090	notreported	notreported
OV	c56.9	female	notreported	notreported	white	OV_unc.edu.990bcb1f-7269-4020-8ea5-8ba338b390b8.1526570.rsem.isoforms.results	62379be5-13f0-474b-94d3-6f944ec4ee96	c56.9	1920	null	null	null	null	null	null	null	Primary Tumor	notreported	28129	dead	null	1259.0	null	1259.0	null	null	88f98d56-7d93-59ed-92e9-0c71546a7a92	c56.9	notreported	-28129	notreported	notreported
LGG	c71.2	male	notreported	nothispanicorlatino	white	LGG_unc.edu.ae83a679-8155-4f3a-9c9b-a3b73c8cd332.1957366.rsem.isoforms.results	33615113-791b-4286-a23a-ad3d1f8d4b09	c71.2	1984	null	null	null	null	null	null	null	Primary Tumor	notreported	9705	alive	null	null	null	1421.0	null	null	2fcb4d4c-c90d-51ad-81f8-422ea9288625	c71.2	notreported	-9705	notreported	notreported
THCA	c73	female	stageiii	hispanicorlatino	white	THCA_unc.edu.135752cc-f7bc-4a55-9e4a-28a4b12a9699.1661556.rsem.isoforms.results	8a476795-0e05-4da6-bbe1-ff7304da1b39	c73.9	1947	null	null	null	null	null	null	null	Primary Tumor	notreported	20403	alive	null	null	null	988.0	null	null	5b5616d1-d79f-50fb-a7cc-9a1848d14e5b	c73.9	notreported	-20403	notreported	notreported
LGG	c71.0	female	notreported	nothispanicorlatino	white	LGG_unc.edu.d4cd474d-abe3-423c-9772-a8edce3bb8c7.1422583.rsem.isoforms.results	8daa29c0-f652-4130-a004-5183bbe30c63	c71.0	1939	null	null	null	null	null	null	null	Primary Tumor	notreported	22031	dead	null	354.0	null	null	null	null	23fc083b-0bd0-5b46-bda8-4281198ac2a8	c71.0	notreported	-22031	notreported	notreported
THCA	c73	male	stageiii	nothispanicorlatino	white	THCA_unc.edu.9bea59ee-e522-41c7-ba60-4cb0cb6b266a.1901289.rsem.isoforms.results	dc392a57-2028-4eca-8bf3-760ec99703ee	c73.9	1935	null	null	null	null	null	null	null	Primary Tumor	notreported	27306	alive	null	null	null	1251.0	null	null	e419830b-ed75-56e3-b901-cb7fc8f93e6e	c73.9	notreported	-27306	notreported	notreported
LGG	c71.0	female	notreported	nothispanicorlatino	white	LGG_unc.edu.ef9256b0-f4e0-4a1e-9ea2-d4afb75b7ba9.2269585.rsem.isoforms.results	878ced76-3144-4141-896f-50e3e863df36	c71.0	1958	null	null	null	null	null	null	null	Primary Tumor	notreported	20128	alive	null	null	null	105.0	null	null	7a3112c5-a878-5b23-bdbc-3aa91d2cede6	c71.0	notreported	-20128	notreported	notreported
BLCA	c67.9	male	stageiv	nothispanicorlatino	white	BLCA_unc.edu.5ddb876d-dd32-4f33-89d1-d95e460e1e60.1469221.rsem.isoforms.results	01ee41ef-1894-4408-9e96-a22a1f068190	c67.9	1945	4.931506849315069	76.7	null	null	0.0025716430586257503	null	172.7	Primary Tumor	notreported	24243	dead	null	434.0	null	134.0	null	null	581e66c1-0add-5ab5-ba2b-eb573ec73460	c67.9	notreported	-24243	notreported	notreported
BLCA	c67.0	male	stageiv	notreported	blackorafricanamerican	BLCA_unc.edu.eac6c8bf-f85e-4eb7-a700-034cd91722d7.2500239.rsem.isoforms.results	72fe54b5-c1c8-468a-954a-09992429512a	c67.0	1937	null	69.0	null	null	0.0025039918710988533	null	166.0	Primary Tumor	notreported	26781	dead	null	522.0	null	493.0	null	null	c84495ea-fa22-5a60-a0a4-221a1bd72ac2	c67.0	notreported	-26781	notreported	notreported
THCA	c73	male	stagei	nothispanicorlatino	white	THCA_unc.edu.aa07b260-11cc-439b-bf1b-84c1a3260f1b.1659574.rsem.isoforms.results	d4355111-3abb-40f0-bdb7-b9eaa39dc771	c73.9	1963	null	null	null	null	null	null	null	Solid Tissue Normal	notreported	15366	alive	null	null	null	2035.0	null	null	bafc4c7e-9751-5c80-af68-4e472f91a3fb	c73.9	notreported	-15366	notreported	notreported
THCA	c73	female	stageii	nothispanicorlatino	white	THCA_unc.edu.5a2ebab3-98a8-4226-987c-3009b2e0d062.1670252.rsem.isoforms.results	1ebd5834-56b8-498a-8f34-c0031fcfd856	c73.9	1943	null	null	null	null	null	null	null	Primary Tumor	notreported	24896	alive	null	null	null	840.0	null	null	fcb12cec-b982-58b4-b19b-3a056a3ac42d	c73.9	notreported	-24896	notreported	notreported
OV	c56.9	female	notreported	nothispanicorlatino	white	OV_unc.edu.95b7a71d-8cf5-4660-ac1d-52a888cd2f20.1555167.rsem.isoforms.results	7413c891-f74e-456f-bc70-69c83fb53c70	c56.9	1928	null	null	null	null	null	null	null	Primary Tumor	notreported	27667	dead	null	31.0	null	31.0	null	null	99ca4e5c-3912-5835-8d01-9492e0b5074f	c56.9	notreported	-27667	notreported	notreported
THCA	c73	male	stagei	nothispanicorlatino	white	THCA_unc.edu.6f1184e8-ea92-4e59-90ca-0f61a9428f20.1658941.rsem.isoforms.results	6befdc6a-27fc-4cde-979b-ffe05cd8603f	c73.9	1973	null	null	null	null	null	null	null	Primary Tumor	notreported	14136	alive	null	null	null	1407.0	null	null	a5a75dd2-ec92-596e-8a86-84be3f7bb432	c73.9	notreported	-14136	notreported	notreported
OV	c56.9	female	notreported	nothispanicorlatino	white	OV_unc.edu.4c8dd391-5a1c-490e-a7d7-fde372c3ec47.1572928.rsem.isoforms.results	41178cbc-db73-4007-b5d8-febebf7f578d	c56.9	1951	null	null	null	null	null	null	null	Primary Tumor	notreported	18162	dead	null	2342.0	null	null	null	null	efeb03d8-43a5-5452-bb12-ad1e0ff9a541	c56.9	notreported	-18162	notreported	notreported
OV	c56.9	female	notreported	notreported	white	OV_unc.edu.368f21cd-dd07-440d-89f5-5874e37fe63b.2723097.rsem.isoforms.results	5503b3a1-7d03-41b2-9ec8-e478c5414d67	c56.9	1940	null	null	null	null	null	null	null	Primary Tumor	notreported	21810	dead	null	568.0	null	568.0	null	null	13f08258-6176-5a27-8f77-a01958a576b2	c56.9	notreported	-21810	notreported	notreported
OV	c56.9	female	notreported	notreported	white	OV_unc.edu.9984be2d-c37f-44cd-9eb8-61b65efcf8cb.2722931.rsem.isoforms.results	9e7d3dea-5d81-4f10-819c-1c2a68ddd150	c56.9	1951	null	null	null	null	null	null	null	Primary Tumor	notreported	17130	dead	null	1955.0	null	1955.0	null	null	4ec47e19-8ac8-5799-995f-ed82d4ebef47	c56.9	notreported	-17130	notreported	notreported
BLCA	c67.9	female	stageii	nothispanicorlatino	asian	BLCA_unc.edu.fc2ec949-9292-4709-b0ea-37368add311d.1821532.rsem.isoforms.results	0db0f02f-94f5-492f-8840-5254792f6879	c67.9	1953	null	54.0	null	null	0.002247658688865765	null	155.0	Primary Tumor	notreported	21347	dead	null	385.0	null	205.0	null	null	75fedaa1-7479-5e4e-8bb9-01452ed95ab9	c67.9	notreported	-21347	notreported	notreported
GBM	c71.9	male	notreported	nothispanicorlatino	white	GBM_unc.edu.cf7e2358-7542-4381-90f4-782663ddc63a.1537340.rsem.isoforms.results	7cada85b-00b1-41e5-9924-e09eb077ad56	c71.9	1949	null	null	null	null	null	null	null	Primary Tumor	notreported	19812	dead	null	394.0	null	320.0	null	null	1f31dc4d-68bd-5d1b-9211-9a7a7f9238b0	c71.9	notreported	-19812	notreported	notreported
OV	c56.9	female	notreported	nothispanicorlatino	white	OV_unc.edu.2535da6b-39f0-41de-afd3-82cb37916b95.1564410.rsem.isoforms.results	0484a929-7a7f-4926-8d25-470ddab082ec	c56.9	1916	null	null	null	null	null	null	null	Primary Tumor	notreported	31925	alive	null	null	null	2329.0	null	null	2dd073be-5331-55f3-bb9b-aa2a4a04d8b8	c56.9	notreported	-31925	notreported	notreported
THCA	c73	female	stagei	nothispanicorlatino	blackorafricanamerican	THCA_unc.edu.c5b06e27-6e58-4555-84d9-b14078219e18.1654576.rsem.isoforms.results	785803bb-42a8-4afb-b7b4-58c114894408	c73.9	1965	null	null	null	null	null	null	null	Primary Tumor	notreported	15853	alive	null	null	null	2162.0	null	null	85df4bc8-18f6-5042-bfdf-ebe377927b8a	c73.9	notreported	-15853	notreported	notreported
LGG	c71.0	male	notreported	nothispanicorlatino	white	LGG_unc.edu.b6bdb9e4-c456-4d5b-8aa1-22c8c33b77ef.1427064.rsem.isoforms.results	68f550ca-3a33-45e4-b1c9-14f99e543263	c71.0	1986	null	null	null	null	null	null	null	Primary Tumor	notreported	8571	dead	null	775.0	null	547.0	null	null	df157cdd-174a-539c-ae8f-698a3b3a46a2	c71.0	notreported	-8571	notreported	notreported
THCA	c73	male	stageii	nothispanicorlatino	white	THCA_unc.edu.5f0eabb7-87f9-4b18-b5d2-cc5ad4ddc3af.1467953.rsem.isoforms.results	77200abe-4a09-4a4a-bb45-60d9b96d4998	c73.9	1944	null	null	null	null	null	null	null	Solid Tissue Normal	notreported	21266	dead	null	1019.0	null	null	null	null	e8422c0f-8a9d-58ec-ab4f-6268e3d3c2ce	c73.9	notreported	-21266	notreported	notreported
OV	c56.9	female	notreported	notreported	notreported	OV_unc.edu.a28ef775-c78b-416f-afeb-89ba265440f0.1527315.rsem.isoforms.results	6ea9877f-eb8d-4ee9-af4c-32a78474d9a6	c56.9	1923	null	null	null	null	null	null	null	Primary Tumor	notreported	30592	alive	null	null	null	260.0	null	null	e7428b28-df7a-5573-8867-a864e51c6a92	c56.9	notreported	-30592	notreported	notreported
BLCA	c67.9	male	stageiii	nothispanicorlatino	white	BLCA_unc.edu.4c8aa0aa-c1ae-4aff-96f2-4636bb1d5c47.1969030.rsem.isoforms.results	d2f329b3-5b44-414b-bccd-7b2d1345d21e	c67.9	1937	null	120.0	null	null	null	null	null	Primary Tumor	notreported	27430	alive	null	null	null	410.0	null	null	23a16e81-e83d-57e1-be22-9bc7b1e5297b	c67.9	notreported	-27430	notreported	notreported
BLCA	c67.2	male	stageii	notreported	white	BLCA_unc.edu.e189bbc1-0308-4f79-b296-01c4b38b8919.2545455.rsem.isoforms.results	49ea6676-ae27-4ca0-a7b3-48423d606d48	c67.2	1950	null	78.0	null	null	0.002830599506459573	null	166.0	Primary Tumor	notreported	22056	alive	null	null	null	1522.0	null	null	d08c6f56-a03e-576e-86f6-54fc397cdafc	c67.2	notreported	-22056	notreported	notreported
LGG	c71.0	male	notreported	nothispanicorlatino	white	LGG_unc.edu.e53c6e65-37e8-4523-b336-d1bc89381a80.2339909.rsem.isoforms.results	975e17c2-b93c-4d45-8a85-786f365e4a93	c71.0	1964	null	null	null	null	null	null	null	Primary Tumor	notreported	12849	dead	null	4412.0	null	null	null	null	429c2e2b-6029-5648-a14e-996209bb0472	c71.0	notreported	-12849	notreported	notreported
THCA	c73	male	stageiva	notreported	notreported	THCA_unc.edu.912946d6-1149-4dac-a01f-36793f9ab0c9.1217881.rsem.isoforms.results	290be61a-84ef-4bed-8e37-b432cba6c88e	c73.9	1934	null	null	null	null	null	null	null	Primary Tumor	notreported	27944	alive	null	null	null	553.0	null	null	e497fa31-2040-59c8-a126-cb6ff5bea964	c73.9	notreported	-27944	notreported	notreported
THCA	c73	female	stageiii	hispanicorlatino	white	THCA_unc.edu.e83e16e4-f792-46d1-840b-0deef301fbf9.1327045.rsem.isoforms.results	2106f0cd-cb3c-4568-bdc5-197ee11f2337	c73.9	1948	null	null	null	null	null	null	null	Primary Tumor	notreported	18640	alive	null	null	null	3296.0	null	null	40904d12-e738-56a7-94c7-fef7cf3c88b4	c73.9	notreported	-18640	notreported	notreported
LGG	c71.0	male	notreported	nothispanicorlatino	white	LGG_unc.edu.dfcfc10d-04ed-495a-9fc4-a5d7af4d5b03.2334272.rsem.isoforms.results	8ed09a8a-3284-4a1b-b369-e25d2fab0f61	c71.0	1984	null	null	null	null	null	null	null	Primary Tumor	notreported	10253	alive	null	null	null	1069.0	null	null	986f1d50-3c8f-57d1-96fa-dba0b9e60608	c71.0	notreported	-10253	notreported	notreported
BLCA	c67.9	male	stageiv	notreported	notreported	BLCA_unc.edu.a56ef438-c2ac-4c6f-9283-59e38ba14f28.1966549.rsem.isoforms.results	001944e5-af34-4061-9c09-bb9ea346f6fd	c67.9	null	2.191780821917808	68.0	null	null	0.002352941176470588	null	170.0	Primary Tumor	notreported	28555	dead	null	274.0	null	null	null	null	e12e0826-637e-5f14-9e42-2e3bcd06ffb1	c67.9	notreported	-28555	notreported	notreported
THCA	c73	male	stageii	nothispanicorlatino	notreported	THCA_unc.edu.27532782-f61f-466c-9758-d693eeecc86f.1248280.rsem.isoforms.results	72d8dcc3-0709-4fd1-98d4-fb75e9340758	c73.9	1955	null	null	null	null	null	null	null	Primary Tumor	notreported	20361	alive	null	null	null	419.0	null	null	53639219-38cc-56e7-b577-81707ec69b29	c73.9	notreported	-20361	notreported	notreported
LGG	c71.0	male	notreported	nothispanicorlatino	white	LGG_unc.edu.05c3a0c4-87d0-409d-a4d4-7b5f6c3ab9e2.2351064.rsem.isoforms.results	04e6e843-7f31-43da-b111-280ce2bd1949	c71.0	1968	null	null	null	null	null	null	null	Primary Tumor	notreported	13108	dead	null	4229.0	null	3787.0	null	null	843f3a98-c512-5060-a271-6327d10b9500	c71.0	notreported	-13108	notreported	notreported
OV	c56.9	female	notreported	nothispanicorlatino	white	OV_unc.edu.25c0888a-25b9-4cc0-a02f-6d363a341e8f.1560259.rsem.isoforms.results	91a17d40-c8cb-4cce-b306-966382a8fe4a	c56.9	1937	null	null	null	null	null	null	null	Primary Tumor	notreported	22517	alive	null	null	null	3825.0	null	null	cfac89b4-e306-5fa3-8441-559631390575	c56.9	notreported	-22517	notreported	notreported
OV	c56.9	female	notreported	nothispanicorlatino	blackorafricanamerican	OV_unc.edu.2b2d5fc7-b109-4d11-a632-db8016268840.1563132.rsem.isoforms.results	15170c7f-5880-4fb6-82ce-68d3df0dfb68	c56.9	1955	null	null	null	null	null	null	null	Primary Tumor	notreported	17573	dead	null	1319.0	null	1319.0	null	null	74c32721-9793-5e47-9563-559b08a6f618	c56.9	notreported	-17573	notreported	notreported
LGG	c71.0	female	notreported	nothispanicorlatino	blackorafricanamerican	LGG_unc.edu.3cf6d88f-d583-448e-a3c1-fd8131738114.1505910.rsem.isoforms.results	dadd7428-9e4d-4652-9469-ab521b88d529	c71.0	1951	null	null	null	null	null	null	null	Primary Tumor	notreported	21745	alive	null	null	null	571.0	null	null	c60c6e61-7083-580e-b58b-8ee210f476da	c71.0	notreported	-21745	notreported	notreported
BLCA	c67.9	male	stageii	nothispanicorlatino	asian	BLCA_unc.edu.38e62ae5-729f-41fa-94e7-7e3caa0a246b.1351636.rsem.isoforms.results	b8a8d2fc-421b-4393-8d5a-946cf72cb496	c67.9	1936	1.36986301369863	59.0	null	null	0.0021671258034894397	null	165.0	Primary Tumor	notreported	27458	alive	null	null	null	398.0	null	null	0777429c-1c4a-5ff3-9134-aea63b23166c	c67.9	notreported	-27458	notreported	notreported
OV	c56.9	female	notreported	notreported	white	OV_unc.edu.e2fcba09-755d-425d-ab4d-cede8ef86e48.2723441.rsem.isoforms.results	f2ec64f5-a414-4c34-99c7-d59bc4e831e0	c56.9	1928	null	null	null	null	null	null	null	Primary Tumor	notreported	25460	dead	null	1746.0	null	1746.0	null	null	f4ff0564-e1c9-5baa-805d-e0331fd5245c	c56.9	notreported	-25460	notreported	notreported
BLCA	c67.9	male	stageiv	nothispanicorlatino	white	BLCA_unc.edu.b19c4e9c-2caf-436b-b728-9849b668c663.2386899.rsem.isoforms.results	aa14ffb4-a715-4636-8251-73d019dddd8c	c67.9	1936	7.671232876712328	100.0	null	null	0.0033412409368839585	null	173.0	Primary Tumor	notreported	28463	alive	null	null	null	495.0	null	null	d7c398ed-72a7-5d01-bb11-ccdf207da1dc	c67.9	notreported	-28463	notreported	notreported
BLCA	c67.9	female	stageiv	nothispanicorlatino	white	BLCA_unc.edu.2c28e7b4-23b3-46b0-927b-c684d73d1543.2503372.rsem.isoforms.results	a648d9bf-cf37-41fc-9515-e8f5ac85fcd4	c67.9	1943	2.191780821917808	56.0	null	null	0.0023309053069719044	null	155.0	Primary Tumor	notreported	23349	dead	null	719.0	null	null	null	null	ceb27a2c-9437-5b78-8758-0cdf015a9de7	c67.9	notreported	-23349	notreported	notreported
THCA	c73	male	stagei	hispanicorlatino	white	THCA_unc.edu.1fb352e1-4be2-4db6-b5aa-44361582117d.1881180.rsem.isoforms.results	dd478399-d2ec-4ae4-a82a-b0258d24d088	c73.9	1976	null	null	null	null	null	null	null	Primary Tumor	notreported	12904	alive	null	null	null	1098.0	null	null	f3e58540-109c-51c2-82cd-039bf1339969	c73.9	notreported	-12904	notreported	notreported
THCA	c73	female	stageiii	nothispanicorlatino	white	THCA_unc.edu.955f7278-0d9c-4a27-8ca2-f05714e4bf48.1364655.rsem.isoforms.results	a00da907-e527-45f9-9afb-2fad2c7b0940	c73.9	1954	null	null	null	null	null	null	null	Primary Tumor	notreported	20951	alive	null	null	null	1337.0	null	null	bfab42c7-75a9-52a2-b9b2-0df62404c8ae	c73.9	notreported	-20951	notreported	notreported
LGG	c71.0	male	notreported	nothispanicorlatino	white	LGG_unc.edu.ce2a4f0a-e77f-446b-9412-432daaf5d351.1642907.rsem.isoforms.results	5b744051-7355-4e15-b035-0621e709a5d7	c71.0	1979	null	null	null	null	null	null	null	Primary Tumor	notreported	10678	alive	null	null	null	1943.0	null	null	04f6b16d-37eb-56da-b41b-6257fb24a9a3	c71.0	notreported	-10678	notreported	notreported
THCA	c73	female	stagei	hispanicorlatino	white	THCA_unc.edu.a75c2127-bf78-41c6-b382-71d0d36b741a.1365527.rsem.isoforms.results	9382942c-40dc-404a-ad8a-697612cdb575	c73.9	1974	null	null	null	null	null	null	null	Primary Tumor	notreported	12594	alive	null	null	null	2406.0	null	null	aadcf672-528f-5102-9f66-39f466bcd5ab	c73.9	notreported	-12594	notreported	notreported
LGG	c71.0	male	notreported	notreported	americanindianoralaskanative	LGG_unc.edu.e621d7be-8167-4260-adff-ce1b57202eaf.2055485.rsem.isoforms.results	e0f8e70a-ac91-4d3c-806c-ba9c14ed43ab	c71.0	1963	null	null	null	null	null	null	null	Primary Tumor	notreported	17331	alive	null	null	null	491.0	null	null	1de6605e-6e6f-5f7c-b75b-bbe5dd0e5593	c71.0	notreported	-17331	notreported	notreported
LGG	c71.9	male	notreported	nothispanicorlatino	white	LGG_unc.edu.a990f055-6b58-49c2-8424-4a3f3f5f91f9.1510897.rsem.isoforms.results	8cba230b-46db-4d35-8123-3879eba32402	c71.9	1988	null	null	null	null	null	null	null	Primary Tumor	notreported	8340	alive	null	null	null	1428.0	null	null	5b5bebbb-3dcc-50ba-aaf6-e720e2abd9fc	c71.9	notreported	-8340	notreported	notreported
THCA	c73	female	stagei	nothispanicorlatino	white	THCA_unc.edu.2cc86cc6-6ee2-4006-b019-01f58b75184d.1658883.rsem.isoforms.results	f2bbb5fa-9997-45de-88d4-8f1e94c18f0d	c73.9	1992	null	null	null	null	null	null	null	Primary Tumor	notreported	6850	alive	null	null	null	1466.0	null	null	6cbdf39d-a279-5838-b6a0-83aae62e5cb9	c73.9	notreported	-6850	notreported	notreported
THCA	c73	male	stagei	notreported	notreported	THCA_unc.edu.b5bc7ce7-649c-43a0-bdd1-d664c8a6ad24.1456164.rsem.isoforms.results	4e80f403-0e10-4725-854d-f023c12ee1e2	c73.9	1979	null	null	null	null	null	null	null	Solid Tissue Normal	notreported	11470	alive	null	null	null	636.0	null	null	78dd03ab-7cf0-5467-b781-a1436d110b27	c73.9	notreported	-11470	notreported	notreported
OV	c56.9	female	notreported	notreported	white	OV_unc.edu.6cb78602-e09f-4dbc-b3e5-684ebe77bddc.1549897.rsem.isoforms.results	09c77947-a333-4392-b18d-a6c1f08764a1	c56.9	1960	null	null	null	null	null	null	null	Primary Tumor	notreported	18227	alive	null	null	null	253.0	null	null	53645a91-09b0-52fe-a6c3-029904ef194e	c56.9	notreported	-18227	notreported	notreported
THCA	c73	female	stageiii	hispanicorlatino	white	THCA_unc.edu.9100edac-3939-4318-993e-276e0f6ce00d.1660824.rsem.isoforms.results	8a476795-0e05-4da6-bbe1-ff7304da1b39	c73.9	1947	null	null	null	null	null	null	null	Solid Tissue Normal	notreported	20403	alive	null	null	null	988.0	null	null	5b5616d1-d79f-50fb-a7cc-9a1848d14e5b	c73.9	notreported	-20403	notreported	notreported
OV	c56.9	female	notreported	nothispanicorlatino	blackorafricanamerican	OV_unc.edu.92adf6a1-4880-4ee4-8ebe-09a943dbfe04.1528100.rsem.isoforms.results	ef653772-e5d2-46ec-8610-f81d75d7353c	c56.9	1957	null	null	null	null	null	null	null	Primary Tumor	notreported	18963	alive	null	null	null	176.0	null	null	c6b4d84c-73bf-54db-b28c-a0e675a19216	c56.9	notreported	-18963	notreported	notreported
GBM	c71.9	female	notreported	nothispanicorlatino	white	GBM_unc.edu.69336246-eb91-424b-9cd2-8cbdcf7adfe7.1540964.rsem.isoforms.results	3a3fc890-1985-4353-861b-dc3abfb364b1	c71.9	1987	null	null	null	null	null	null	null	Primary Tumor	notreported	8533	alive	null	null	null	204.0	null	null	e8c9cc05-bbd8-5168-b17b-c6815ecdc3ad	c71.9	notreported	-8533	notreported	notreported
GBM	c71.9	male	notreported	nothispanicorlatino	white	GBM_unc.edu.2de8f5dd-decd-47f4-856a-bda678ee6ab8.1544286.rsem.isoforms.results	be3a7ef3-34ed-40e1-9d9c-187940596b26	c71.9	1946	null	null	null	null	null	null	null	Primary Tumor	notreported	22867	dead	null	480.0	null	480.0	null	null	d397782c-3a0b-567c-a3f9-719d05509d2d	c71.9	notreported	-22867	notreported	notreported
BLCA	c67.9	male	stageiii	nothispanicorlatino	white	BLCA_unc.edu.6c392517-fe3d-4d86-8397-c08734fe20cc.1772358.rsem.isoforms.results	9aa6522a-120a-4691-993e-3f8534f644b5	c67.9	1925	null	71.0	null	null	0.0023183673469387754	null	175.0	Primary Tumor	notreported	32134	alive	null	null	null	105.0	null	null	926a6122-6d5c-58c2-ac94-835a49f389b5	c67.9	notreported	-32134	notreported	notreported
GBM	c71.9	male	notreported	nothispanicorlatino	asian	GBM_unc.edu.35578669-fb40-49fa-b6b5-3bd0f239fa7e.1544381.rsem.isoforms.results	a2ac9937-f351-4d78-9261-264bf6c21e0c	c71.9	1965	null	null	null	null	null	null	null	Primary Tumor	notreported	15964	alive	null	null	null	466.0	null	null	db947c5a-b0c8-5e53-93f1-d24953c8bd0a	c71.9	notreported	-15964	notreported	notreported
THCA	c73	male	stagei	nothispanicorlatino	white	THCA_unc.edu.677b46a9-5c2e-4815-bbc0-b334882c22a3.1458782.rsem.isoforms.results	77d5b246-33ba-4a96-9d73-06aca797653e	c73.9	1954	null	null	null	null	null	null	null	Primary Tumor	notreported	20779	alive	null	null	null	1161.0	null	null	51f6d504-33cd-525a-8391-06c36dfc8dff	c73.9	notreported	-20779	notreported	notreported
THCA	c73	female	stagei	nothispanicorlatino	asian	THCA_unc.edu.58275e37-85f2-471c-8afe-fb426f7ce8c1.1816873.rsem.isoforms.results	a5406575-c840-475a-ab1b-e1a159413fbd	c73.9	1984	null	null	null	null	null	null	null	Primary Tumor	notreported	10192	alive	null	null	null	325.0	null	null	58392de8-dd66-513c-9d3d-9966c739f984	c73.9	notreported	-10192	notreported	notreported
THCA	c73	male	stagei	nothispanicorlatino	white	THCA_unc.edu.5e035459-b8ce-4de1-bef6-ba12d618a711.1456345.rsem.isoforms.results	a3810f36-d2b4-4a45-ad08-a4dbfb9d27aa	c73.9	1930	null	null	null	null	null	null	null	Primary Tumor	notreported	29375	alive	null	null	null	775.0	null	null	bc08357d-6da9-50fb-a2c3-b950a852a185	c73.9	notreported	-29375	notreported	notreported
THCA	c73	female	stagei	nothispanicorlatino	white	THCA_unc.edu.f929972c-1b5a-4fdb-b992-f69eb572496d.1918382.rsem.isoforms.results	a3f87411-0a7b-4415-ba17-8edcc2639f6c	c73.9	1967	null	null	null	null	null	null	null	Primary Tumor	notreported	15962	alive	null	null	null	928.0	null	null	ff178786-1152-5871-b0e8-ce4ee832b0ee	c73.9	notreported	-15962	notreported	notreported
OV	c56.9	female	notreported	nothispanicorlatino	white	OV_unc.edu.9f35075d-4d81-44f2-a672-12028d6231be.2723151.rsem.isoforms.results	ebe677e6-94b6-45be-a58d-eaae4cf63d12	c56.9	1935	null	null	null	null	null	null	null	Primary Tumor	notreported	24223	alive	null	null	null	2661.0	null	null	2d20c4d9-3e33-5e7a-90e1-7a4f1dbae09a	c56.9	notreported	-24223	notreported	notreported
LGG	c71.0	female	notreported	hispanicorlatino	white	LGG_unc.edu.65f141fb-b893-4254-83e8-b8989bf01cf1.2331459.rsem.isoforms.results	44553e34-5111-40a8-b76a-254751be3f87	c71.0	1987	null	null	null	null	null	null	null	Primary Tumor	notreported	9172	alive	null	null	null	-1.0	null	null	c840eb39-2748-544f-9ed2-2e45a67a9712	c71.0	notreported	-9172	notreported	notreported
GBM	c71.9	male	notreported	nothispanicorlatino	white	GBM_unc.edu.ecd3ecba-4d25-4995-91df-e076f0cbe2bc.1534620.rsem.isoforms.results	1030a6b9-0df8-4d60-b69f-2a36e630a6ad	c71.9	1927	null	null	null	null	null	null	null	Primary Tumor	notreported	29964	alive	null	null	null	693.0	null	null	1395d750-6152-586c-99db-63cc73632eef	c71.9	notreported	-29964	notreported	notreported
THCA	c73	female	stageiii	notreported	white	THCA_unc.edu.d603ef6d-a51b-4210-af30-b2ff234a1a7a.1329427.rsem.isoforms.results	b55375c3-9ef2-4d2f-9c29-224e746931c4	c73.9	1956	null	null	null	null	null	null	null	Primary Tumor	notreported	19878	alive	null	null	null	1349.0	null	null	5acaf1b2-84db-5069-ad5b-87abadaa62f3	c73.9	notreported	-19878	notreported	notreported
GBM	c71.9	male	notreported	nothispanicorlatino	asian	GBM_unc.edu.94985059-d992-4f1f-ae67-36cf287f443d.1539952.rsem.isoforms.results	350232cb-b9ba-465b-be9a-81afbc6a92e9	c71.9	1964	null	null	null	null	null	null	null	Primary Tumor	notreported	16737	alive	null	null	null	160.0	null	null	3990375c-931f-51c5-96a5-aa84170c0b3f	c71.9	notreported	-16737	notreported	notreported
OV	c56.9	female	notreported	nothispanicorlatino	white	OV_unc.edu.43352a4d-f866-4ed7-81f5-5dc478c10992.1549815.rsem.isoforms.results	6264e699-d40b-4ebc-b443-0a0edcb220dc	c56.9	1933	null	null	null	null	null	null	null	Primary Tumor	notreported	26145	dead	null	92.0	null	92.0	null	null	962f2f69-2e79-50fc-ba72-03bf96cc0d4b	c56.9	notreported	-26145	notreported	notreported
THCA	c73	male	stagei	notreported	notreported	THCA_unc.edu.102d50cb-a421-42d3-b417-be1e96a85ec8.1211621.rsem.isoforms.results	7802140a-e518-4ae6-9bd1-c26d80b14ab1	c73.9	1982	null	null	null	null	null	null	null	Primary Tumor	notreported	10485	alive	null	null	null	544.0	null	null	8d9d9330-a97b-53ee-b0e7-2f7958abfa03	c73.9	notreported	-10485	notreported	notreported
THCA	c73	female	stageiii	nothispanicorlatino	white	THCA_unc.edu.eec1dd96-abdb-4198-a4a1-24f112c24b71.1329817.rsem.isoforms.results	7a45cbc2-9fbe-49f9-9d70-f8dc82829769	c73.9	1951	null	null	null	null	null	null	null	Primary Tumor	notreported	20164	alive	null	null	null	2987.0	null	null	292e77c6-d9cd-54f0-81bd-d44ed5a7929c	c73.9	notreported	-20164	notreported	notreported
BLCA	c67.9	male	stageiv	nothispanicorlatino	white	BLCA_unc.edu.e356927b-b100-4adf-9935-e4fbf31d1fd3.2315404.rsem.isoforms.results	d46f7976-6061-4ca9-8294-6c215703662b	c67.9	null	null	92.0	null	null	0.0031833910034602076	null	170.0	Primary Tumor	notreported	22717	alive	null	null	null	1127.0	null	null	d76fa660-66e1-5fcf-841c-4bdcad4ee44e	c67.9	notreported	-22717	notreported	notreported
GBM	c71.9	male	notreported	nothispanicorlatino	white	GBM_unc.edu.25315562-5f8e-46d0-ab77-d1f6ce75270b.1544618.rsem.isoforms.results	2188c194-dfe4-4471-9b8b-050db1a1062c	c71.9	1978	null	null	null	null	null	null	null	Primary Tumor	notreported	11112	dead	null	632.0	null	165.0	null	null	6ae64e35-2c8f-5aea-aba2-58f534ab51d8	c71.9	notreported	-11112	notreported	notreported
LGG	c71.0	female	notreported	nothispanicorlatino	white	LGG_unc.edu.6fbc1aba-a377-4b7e-90ee-d86053187a67.1671542.rsem.isoforms.results	02194c0c-e2c1-4ea7-994a-07b61b2575e2	c71.0	1979	null	null	null	null	null	null	null	Primary Tumor	notreported	11118	alive	null	null	null	956.0	null	null	9cbd72d7-8147-557f-b09f-135cb72e0d5f	c71.0	notreported	-11118	notreported	notreported
LGG	c71.0	male	notreported	nothispanicorlatino	white	LGG_unc.edu.049ee2d6-c67a-42e2-a39d-2eb15650ca63.1674438.rsem.isoforms.results	7740824e-905f-47a0-b235-54561ef58ba3	c71.0	1950	null	null	null	null	null	null	null	Primary Tumor	notreported	21844	alive	null	null	null	964.0	null	null	7dabe371-adca-5df7-8a60-17f0651b4023	c71.0	notreported	-21844	notreported	notreported
LGG	c71.9	female	notreported	nothispanicorlatino	white	LGG_unc.edu.772424b5-73f8-434e-a565-1cde4aaa1126.1414469.rsem.isoforms.results	b6c2c9bd-625b-4a98-830c-49c344f6cb5f	c71.9	1957	null	null	null	null	null	null	null	Primary Tumor	notreported	19399	alive	null	null	null	1631.0	null	null	7bd2a3d1-a51f-5153-9269-d66dc3ff7422	c71.9	notreported	-19399	notreported	notreported
BLCA	c67.4	male	stageii	nothispanicorlatino	white	BLCA_unc.edu.57baff29-25d2-46ce-937f-f25343dcebc3.2031709.rsem.isoforms.results	5a25658c-2436-4a47-8902-8a2cf4a1c20d	c67.4	1937	null	null	null	null	null	null	null	Primary Tumor	notreported	27518	alive	null	null	null	539.0	null	null	6b466329-6e11-5e1b-a90d-516fb18f5648	c67.4	notreported	-27518	notreported	notreported
LGG	c71.0	male	notreported	nothispanicorlatino	white	LGG_unc.edu.03eb7467-7dd5-4228-86b9-7b3b31ba1496.2332357.rsem.isoforms.results	e349d8aa-bb82-4ce8-b14c-61216289f25b	c71.0	1960	null	null	null	null	null	null	null	Primary Tumor	notreported	19025	dead	null	228.0	null	null	null	null	01e45df7-ea75-5b9e-bb8d-088f6d1b41ba	c71.0	notreported	-19025	notreported	notreported
LGG	c71.0	female	notreported	nothispanicorlatino	white	LGG_unc.edu.a48f9376-bff1-4939-8d52-349e471b650f.1567811.rsem.isoforms.results	4839a058-fbca-44c7-bd61-81943b4d45d5	c71.0	1982	null	null	null	null	null	null	null	Primary Tumor	notreported	9447	alive	null	null	null	1706.0	null	null	5a51e633-5a1a-5850-a8f0-bffc4e7544aa	c71.0	notreported	-9447	notreported	notreported
GBM	c71.9	female	notreported	nothispanicorlatino	white	GBM_unc.edu.11a0e909-11e7-40f3-be04-5bd2143ee6ab.1545078.rsem.isoforms.results	dd76930a-1678-4b70-9864-730534174d41	c71.9	1948	null	null	null	null	null	null	null	Primary Tumor	notreported	21678	dead	null	300.0	null	0.0	null	null	b5a26c30-678a-52f0-bd22-d67d7fc4cbfe	c71.9	notreported	-21678	notreported	notreported
LGG	c71.0	male	notreported	nothispanicorlatino	white	LGG_unc.edu.6563f101-9cbe-4126-a5dd-fa33c694c257.2277809.rsem.isoforms.results	723cad09-aa2d-4492-b19d-661b310e1c58	c71.0	1979	null	null	null	null	null	null	null	Primary Tumor	notreported	12460	alive	null	null	null	3.0	null	null	bd4b0948-9d79-5092-9f36-41a4a09cd3f8	c71.0	notreported	-12460	notreported	notreported
LGG	c71.0	female	notreported	nothispanicorlatino	white	LGG_unc.edu.7b9b3507-bd43-4915-8f53-89cee202ad6e.2311131.rsem.isoforms.results	141f0546-f6f2-408f-ac86-07ca4aadf3d0	c71.0	1949	null	null	null	null	null	null	null	Primary Tumor	notreported	23482	alive	null	null	null	354.0	null	null	ff61fa80-46fa-5f55-875b-74cd8e6629fa	c71.0	notreported	-23482	notreported	notreported
LGG	c71.0	male	notreported	nothispanicorlatino	white	LGG_unc.edu.6740d6ab-1321-4806-961a-116ce5be8d29.2061978.rsem.isoforms.results	cf2a1b98-5693-4c04-9167-f85e69a88a4a	c71.0	1990	null	null	null	null	null	null	null	Primary Tumor	notreported	8335	alive	null	null	null	533.0	null	null	78b0778d-5ed8-5c7f-a5a4-ec8b22e6b703	c71.0	notreported	-8335	notreported	notreported
OV	c56.9	female	notreported	nothispanicorlatino	blackorafricanamerican	OV_unc.edu.3a1867ff-7c1e-47c1-854f-90c0af4b2d03.2705346.rsem.isoforms.results	c7cf6755-8856-435b-a443-174b22a25b07	c56.9	1934	null	null	null	null	null	null	null	Primary Tumor	notreported	28623	alive	null	null	null	576.0	null	null	e64f78a3-2512-50f4-8b0c-34493a440422	c56.9	notreported	-28623	notreported	notreported
THCA	c73	female	stageii	nothispanicorlatino	white	THCA_unc.edu.89cc780a-8614-4dc5-8f8f-2e8a07384e47.1456495.rsem.isoforms.results	8bea483b-ac43-4265-b2c4-0f031e539008	c73.9	1954	null	null	null	null	null	null	null	Primary Tumor	notreported	20973	alive	null	null	null	1045.0	null	null	94b9a189-ed7a-55fe-841d-3befce4e1b5d	c73.9	notreported	-20973	notreported	notreported
LGG	c71.0	female	notreported	nothispanicorlatino	white	LGG_unc.edu.2ef476c6-ffb6-45b0-b92c-47808e9b4f10.1570194.rsem.isoforms.results	f18dab99-26b0-4727-89a9-7f16bd382356	c71.0	1949	null	null	null	null	null	null	null	Primary Tumor	notreported	21019	dead	null	933.0	null	null	null	null	2f2c48c0-f497-51fb-b8eb-e1b4f3c86f4d	c71.0	notreported	-21019	notreported	notreported
BLCA	c67.9	male	stageiv	nothispanicorlatino	white	BLCA_unc.edu.1e48f03f-3939-4dfd-8d32-c85ec473678a.2635056.rsem.isoforms.results	03f588d6-832e-47d8-a9c4-af6640a1a635	c67.9	1939	1.643835616438356	90.0	null	null	0.002629656683710738	null	185.0	Primary Tumor	notreported	24019	dead	null	486.0	null	null	null	null	2fa5583d-30d2-5316-ba96-5c78e506b6a1	c67.9	notreported	-24019	notreported	notreported
THCA	c73	female	stagei	nothispanicorlatino	white	THCA_unc.edu.a1d090b6-22e9-44df-919d-0f5754851945.1328927.rsem.isoforms.results	a061976d-ba2c-4a18-a51e-952f198eb4d5	c73.9	1966	null	null	null	null	null	null	null	Primary Tumor	notreported	15404	alive	null	null	null	2451.0	null	null	d1316b28-15d3-59e7-921c-05a26993f19a	c73.9	notreported	-15404	notreported	notreported
THCA	c73	female	stagei	nothispanicorlatino	notreported	THCA_unc.edu.711566ef-6200-4bc2-8c5b-ec74ed14b91d.1370278.rsem.isoforms.results	cd73c807-a74e-46a8-9855-92de33da9b0d	c73.9	1986	null	null	null	null	null	null	null	Primary Tumor	notreported	7636	alive	null	null	null	3299.0	null	null	38949579-4382-5bec-ab3e-45ae6f885378	c73.9	notreported	-7636	notreported	notreported
GBM	c71.9	female	notreported	nothispanicorlatino	white	GBM_unc.edu.8401d72d-a286-4541-b566-c6212ef4c89c.1540222.rsem.isoforms.results	a589e2dc-7649-492c-9569-592698acaa6f	c71.9	1959	null	null	null	null	null	null	null	Recurrent Tumor	notreported	17714	dead	null	666.0	null	666.0	null	null	41df5768-d6e4-5242-aa90-d36881ebd24d	c71.9	notreported	-17714	notreported	notreported
OV	c56.9	female	notreported	nothispanicorlatino	white	OV_unc.edu.7517c446-401d-4501-bf27-916e0835deac.1540323.rsem.isoforms.results	20336269-5a5b-4ba7-8fe8-665a1f9af738	c56.9	1938	null	null	null	null	null	null	null	Primary Tumor	notreported	23407	dead	null	1891.0	null	1843.0	null	null	a2f9c05f-49fc-5fcf-8f44-9a62df7e890e	c56.9	notreported	-23407	notreported	notreported
OV	c56.9	female	notreported	nothispanicorlatino	white	OV_unc.edu.67e85198-4b8c-45db-b433-683b1899f3ea.1548644.rsem.isoforms.results	82093ed9-a3c8-4e34-931f-4ec7ae745711	c56.9	1959	null	null	null	null	null	null	null	Primary Tumor	notreported	18134	alive	null	null	null	442.0	null	null	f8565836-3634-5b5c-8823-e193d83d3527	c56.9	notreported	-18134	notreported	notreported
BLCA	c67.9	female	stageii	nothispanicorlatino	white	BLCA_unc.edu.85f596e4-9591-49f5-8408-25e4ce16c7f7.2449074.rsem.isoforms.results	6aa72ca1-b378-4db4-b4ef-b12386683d1f	c67.9	1944	4.109589041095891	69.0	null	null	0.0021296296296296298	null	180.0	Primary Tumor	notreported	25498	alive	null	null	null	641.0	null	null	5d17cbdd-6988-5f19-af74-8b1fb8f6735c	c67.9	notreported	-25498	notreported	notreported
THCA	c73	female	stagei	nothispanicorlatino	white	THCA_unc.edu.31a1cf5c-f1ba-400f-8722-081c9cf7f013.2282028.rsem.isoforms.results	a6d37f61-beca-46ea-a59a-62257475ac77	c73.9	1979	null	null	null	null	null	null	null	Primary Tumor	notreported	11999	alive	null	null	null	344.0	null	null	d529377b-33d1-55fb-804f-05ad35443aec	c73.9	notreported	-11999	notreported	notreported
THCA	c73	female	stagei	notreported	notreported	THCA_unc.edu.b3cb1236-9b86-4552-bba1-2e8fd25f30b8.1329956.rsem.isoforms.results	c8703a65-816b-4f6e-bb15-53dcb3288f66	c73.9	1991	null	null	null	null	null	null	null	Primary Tumor	notreported	7558	alive	null	null	null	1474.0	null	null	20d23bf8-43cf-5296-b2e2-f5462f52e135	c73.9	notreported	-7558	notreported	notreported
THCA	c73	female	stagei	nothispanicorlatino	white	THCA_unc.edu.49a08d66-91cc-4db0-beed-db9c9e4d9bd0.1655296.rsem.isoforms.results	149b46a3-75de-44e1-ba73-bdc4ff379c7f	c73.9	1964	null	null	null	null	null	null	null	Primary Tumor	notreported	15685	alive	null	null	null	2773.0	null	null	755cc10f-3837-5cc8-bbb1-06777427df8b	c73.9	notreported	-15685	notreported	notreported
THCA	c73	female	stagei	notreported	notreported	THCA_unc.edu.e7927134-7458-42ec-8669-34a201477e9e.1326834.rsem.isoforms.results	6491d025-c061-4180-bfd4-d7c6e6e55f66	c73.9	1975	null	null	null	null	null	null	null	Primary Tumor	notreported	13188	alive	null	null	null	1006.0	null	null	93c47e3e-96d2-5ee2-840d-b2ebad476064	c73.9	notreported	-13188	notreported	notreported
BLCA	c67.9	male	stageii	nothispanicorlatino	white	BLCA_unc.edu.56907638-5828-4ad8-9be9-a6cf5aa90f7b.2469876.rsem.isoforms.results	fa05f7f6-50e9-4878-a834-f655c0877394	c67.9	1935	2.8493150684931505	null	null	null	null	null	null	Primary Tumor	notreported	27281	alive	null	null	null	1949.0	null	null	81d1ce08-c5fc-5ab5-bcd1-e51562240852	c67.9	notreported	-27281	notreported	notreported
THCA	c73	female	stagei	nothispanicorlatino	white	THCA_unc.edu.d8c91de0-3257-4c49-8eae-dfc381a81481.1654723.rsem.isoforms.results	44c2da7c-6975-4d09-b65c-4b30afd019bb	c73.9	1957	null	null	null	null	null	null	null	Primary Tumor	notreported	20320	alive	null	null	null	579.0	null	null	c5f50baf-bbfb-582d-b9ec-8727c7fdf561	c73.9	notreported	-20320	notreported	notreported
THCA	c73	male	stageiva	nothispanicorlatino	white	THCA_unc.edu.e4d13a24-fbba-4167-af93-94c4b0b3bb48.1280319.rsem.isoforms.results	7044dee0-fd6c-4e75-b731-dc60a386a1ab	c73.9	1940	null	null	null	null	null	null	null	Primary Tumor	notreported	25703	alive	null	null	null	961.0	null	null	ce3ac8ec-68b4-5850-be14-8fba652df880	c73.9	notreported	-25703	notreported	notreported
BLCA	c67.9	male	stageiii	nothispanicorlatino	white	BLCA_unc.edu.c8d6dc3d-024b-4b68-9395-c3c2c38e8bb2.2469584.rsem.isoforms.results	63443198-4fcf-40bd-befb-4a6920d29ca4	c67.9	1953	null	96.0	null	null	0.0027452886842632045	null	187.0	Primary Tumor	notreported	20611	alive	null	null	null	1830.0	null	null	1ac2a6ef-d0a4-5af6-8f34-cfe098bbacee	c67.9	notreported	-20611	notreported	notreported
LGG	c71.0	female	notreported	nothispanicorlatino	white	LGG_unc.edu.cd935b60-ed16-4f34-98ad-1e6cf0671683.2333467.rsem.isoforms.results	f842f756-ce78-4c99-bcf8-3bce18a4d9ef	c71.0	1969	null	null	null	null	null	null	null	Primary Tumor	notreported	11971	dead	null	886.0	null	null	null	null	34c1a118-ca21-571e-b5fe-8d2f43b45283	c71.0	notreported	-11971	notreported	notreported
LGG	c71.0	male	notreported	nothispanicorlatino	white	LGG_unc.edu.31cec6a7-3560-4837-a220-a34d1e45ed24.2409152.rsem.isoforms.results	fcf14e9d-4671-453d-b8e0-5008e916f56d	c71.0	1981	null	null	null	null	null	null	null	Primary Tumor	notreported	11668	alive	null	null	null	772.0	null	null	5c0ae726-5eee-53b2-bdd2-a7ecf52c2e83	c71.0	notreported	-11668	notreported	notreported
LGG	c71.0	male	notreported	nothispanicorlatino	white	LGG_unc.edu.a9db06e4-4069-4533-b85e-9e2fbbaaec7d.2031638.rsem.isoforms.results	0611f5bc-89b5-44bd-b301-751faaadb561	c71.0	1982	null	null	null	null	null	null	null	Primary Tumor	notreported	11070	alive	null	null	null	179.0	null	null	f228677d-37d9-51ee-94b6-9f92577de087	c71.0	notreported	-11070	notreported	notreported
BLCA	c67.3	male	stageiv	nothispanicorlatino	white	BLCA_unc.edu.92e94724-a03e-4b58-91b2-f309ab8dc943.2157837.rsem.isoforms.results	d5e8d936-40ae-4fd3-b40e-cac54763d71f	c67.3	1965	null	95.0	null	null	0.002932098765432099	null	180.0	Primary Tumor	notreported	16453	alive	null	null	null	1542.0	null	null	4ebf2bf8-0223-5523-b08e-2fff7476bcd7	c67.3	notreported	-16453	notreported	notreported
GBM	c71.9	male	notreported	hispanicorlatino	white	GBM_unc.edu.6287ca85-ad7b-4656-9c6e-8c3c44833462.1541709.rsem.isoforms.results	a262928c-e20a-4c02-8114-1227e05c43e1	c71.9	1973	null	null	null	null	null	null	null	Recurrent Tumor	notreported	13257	alive	null	null	null	214.0	null	null	cdaceb60-cc09-5f83-9ff1-2ab04178ca82	c71.9	notreported	-13257	notreported	notreported
OV	c56.9	female	notreported	notreported	white	OV_unc.edu.ce0fd762-e18f-4cca-a4c4-c064dca62e60.1519041.rsem.isoforms.results	2517ca7a-6057-4c19-b7e1-f6d078e9881a	c56.9	1916	null	null	null	null	null	null	null	Primary Tumor	notreported	29050	dead	null	1059.0	null	1059.0	null	null	d2d82e4b-87db-5610-a968-930933e83fb7	c56.9	notreported	-29050	notreported	notreported
GBM	c71.9	male	notreported	nothispanicorlatino	asian	GBM_unc.edu.a77fc356-53b6-4932-a369-4bb7b89f8ed2.1538008.rsem.isoforms.results	a2338b30-f511-4163-af3b-1e4a40ff00e1	c71.9	1930	null	null	null	null	null	null	null	Primary Tumor	notreported	25326	dead	null	68.0	null	68.0	null	null	e84ef8da-1b77-5281-9b85-a2c5be51435c	c71.9	notreported	-25326	notreported	notreported
LGG	c71.0	male	notreported	nothispanicorlatino	white	LGG_unc.edu.f2efed52-3995-4a64-a845-2b50517c9554.2309353.rsem.isoforms.results	1b77d1e8-0a02-41de-a408-dcf33a43407a	c71.0	1965	null	null	null	null	null	null	null	Primary Tumor	notreported	17390	alive	null	null	null	372.0	null	null	db0f9a55-85e5-51ee-9e98-f9dca4cef5d0	c71.0	notreported	-17390	notreported	notreported
THCA	c73	female	stagei	notreported	notreported	THCA_unc.edu.a2834aba-b6c1-4e62-8682-d6fc9d093e49.1564134.rsem.isoforms.results	fef9c64f-5959-4da0-aaa2-66b56fc7b4c3	c73.9	1992	null	null	null	null	null	null	null	Primary Tumor	notreported	7176	alive	null	null	null	492.0	null	null	22c3d7b4-967b-55d7-a9f3-dd13a2e352da	c73.9	notreported	-7176	notreported	notreported
THCA	c73	male	stageiii	nothispanicorlatino	blackorafricanamerican	THCA_unc.edu.828c21a3-2e9b-4c2e-b2b5-47ec3ad7c548.1729975.rsem.isoforms.results	a1196d5f-8c7d-4d9d-9e46-c5c22a9c2fef	c73.9	1934	null	null	null	null	null	null	null	Primary Tumor	notreported	28490	dead	null	243.0	null	175.0	null	null	1e24fc17-3032-5544-a512-a4102761dc05	c73.9	notreported	-28490	notreported	notreported
LGG	c71.0	female	notreported	nothispanicorlatino	white	LGG_unc.edu.12953bc4-8704-4fcc-9efa-3801a1a6c4b7.1665542.rsem.isoforms.results	e488f613-f155-4e11-87d4-8c789ea81691	c71.0	1983	null	null	null	null	null	null	null	Primary Tumor	notreported	10641	alive	null	null	null	516.0	null	null	b75932e9-4cac-5b68-8d6e-23b9058fe072	c71.0	notreported	-10641	notreported	notreported
THCA	c73	female	stagei	nothispanicorlatino	white	THCA_unc.edu.fce125fa-4f67-46cf-bdc9-988e081ae777.1918972.rsem.isoforms.results	dc5c1a76-30de-4b30-b397-3ad691c92a86	c73.9	1977	null	null	null	null	null	null	null	Primary Tumor	notreported	12978	alive	null	null	null	739.0	null	null	041c590e-bc5a-5013-aaea-e0b2ad4b4e14	c73.9	notreported	-12978	notreported	notreported
BLCA	c67.9	male	stageiii	nothispanicorlatino	white	BLCA_unc.edu.2ffd7576-f25e-44f1-ba9f-7db6030aa0c6.2640888.rsem.isoforms.results	b027f4e2-f260-4d60-a1f4-444bc49c4a0b	c67.9	1928	0.6575342465753424	110.0	null	null	0.0038514057631035326	null	169.0	Primary Tumor	notreported	27826	alive	null	null	null	1048.0	null	null	753d9704-6208-548f-a42f-ee1352b172a8	c67.9	notreported	-27826	notreported	notreported
LGG	c71.9	female	notreported	nothispanicorlatino	white	LGG_unc.edu.faeb1918-077c-417e-9acc-9733b756511c.1670138.rsem.isoforms.results	ffcec8e5-9fd3-4b42-a7cb-74761f713cf4	c71.9	1978	null	null	null	null	null	null	null	Primary Tumor	notreported	11233	alive	null	null	null	526.0	null	null	4283063f-fad7-561f-913e-9778439af9db	c71.9	notreported	-11233	notreported	notreported
GBM	c71.9	male	notreported	nothispanicorlatino	white	GBM_unc.edu.31398055-e000-4ca1-a37d-aac2df5920b4.1544141.rsem.isoforms.results	2c5fa2d4-8e35-42e4-8bca-9fb3371a19c8	c71.9	1935	null	null	null	null	null	null	null	Primary Tumor	notreported	27196	alive	null	null	null	286.0	null	null	38549ca2-a9e1-55cf-9370-b589f484b485	c71.9	notreported	-27196	notreported	notreported
THCA	c73	female	stagei	nothispanicorlatino	white	THCA_unc.edu.27782ad0-f3c6-43a3-8123-199ebdd92c25.1349065.rsem.isoforms.results	f69ff5fb-7e0b-4b16-9fc9-498379b11562	c73.9	1993	null	null	null	null	null	null	null	Primary Tumor	notreported	6684	alive	null	null	null	356.0	null	null	1823990b-8825-5ab9-92e0-196f1e3c2014	c73.9	notreported	-6684	notreported	notreported
OV	c56.9	female	notreported	nothispanicorlatino	blackorafricanamerican	OV_unc.edu.05689fed-96dd-4c52-b51d-5dc799422b9a.2705781.rsem.isoforms.results	260723bf-9620-450d-bf31-f3a45543f9db	c56.9	1962	null	null	null	null	null	null	null	Primary Tumor	notreported	17580	alive	null	null	null	1207.0	null	null	82ad7dba-92ee-55f3-ba07-577d050bf995	c56.9	notreported	-17580	notreported	notreported
OV	c56.9	female	notreported	nothispanicorlatino	asian	OV_unc.edu.10271f7f-cce6-44fd-8754-7a4beabfb394.1563509.rsem.isoforms.results	3ac45a71-c463-4f0f-b030-58c475a34418	c56.9	1967	null	null	null	null	null	null	null	Primary Tumor	notreported	14791	alive	null	null	null	932.0	null	null	4233e6db-8d18-5461-b504-3aa62d11e73f	c56.9	notreported	-14791	notreported	notreported
OV	c56.9	female	notreported	notreported	blackorafricanamerican	OV_unc.edu.74970c45-4cc5-4952-9846-ce2d959437ea.2723261.rsem.isoforms.results	18d21132-a795-4551-83ba-66483de423a2	c56.9	1951	null	null	null	null	null	null	null	Primary Tumor	notreported	19611	alive	null	null	null	2078.0	null	null	e383018c-dd08-5acf-a9de-02abce0898a7	c56.9	notreported	-19611	notreported	notreported
LGG	c71.0	male	notreported	nothispanicorlatino	white	LGG_unc.edu.8b99cc75-d8cc-4d18-9a6b-c66f8bd7ea0d.2334381.rsem.isoforms.results	194e8231-e8d4-477f-8c62-e11f2484ecce	c71.0	1988	null	null	null	null	null	null	null	Primary Tumor	notreported	9345	alive	null	null	null	62.0	null	null	87d22486-35a6-5299-ad5a-d83bcf0515e1	c71.0	notreported	-9345	notreported	notreported
BLCA	c67.2	female	stageiv	nothispanicorlatino	white	BLCA_unc.edu.fe6853dd-864f-4257-869f-a425aab32346.2256085.rsem.isoforms.results	6134f549-6876-4c07-8e58-49ec87eaf4c0	c67.2	1933	null	81.0	null	null	0.0035058864265927977	null	152.0	Primary Tumor	notreported	29317	dead	null	69.0	null	63.0	null	null	19a0a64e-bd77-5630-93a2-d966b65fc894	c67.2	notreported	-29317	notreported	notreported
THCA	c73	female	stagei	nothispanicorlatino	asian	THCA_unc.edu.3f73b2d7-1c70-4a7d-a742-e3f6e9b77ccc.1651881.rsem.isoforms.results	d5ea6520-e446-43d2-9883-441f70d80359	c73.9	1974	null	null	null	null	null	null	null	Primary Tumor	notreported	13909	alive	null	null	null	912.0	null	null	62c1ac47-25b6-5fd9-b9eb-b291a907c048	c73.9	notreported	-13909	notreported	notreported
LGG	c71.0	female	notreported	nothispanicorlatino	white	LGG_unc.edu.748811da-49b0-4ff6-a718-0549921871be.1569999.rsem.isoforms.results	01c4ca12-ac08-41dd-9e4f-bfb0971688a2	c71.0	1968	null	null	null	null	null	null	null	Primary Tumor	notreported	11854	dead	null	4695.0	null	4206.0	null	null	bdd37246-a8b1-56a5-a11a-2b0dea892f80	c71.0	notreported	-11854	notreported	notreported
BLCA	c67.2	male	stageiv	nothispanicorlatino	white	BLCA_unc.edu.bd1ba628-0cb5-4103-baa4-3f430d24d359.1474881.rsem.isoforms.results	94809fbf-4895-42c0-a7c6-f39ee1a41f1a	c67.2	1944	1.643835616438356	88.0	null	null	0.0025712198685171658	null	185.0	Primary Tumor	notreported	25147	dead	null	168.0	null	null	null	null	4d1baea0-7f8d-58ff-9ad6-e86e89f978c8	c67.2	notreported	-25147	notreported	notreported
GBM	c71.9	female	notreported	nothispanicorlatino	white	GBM_unc.edu.faadb03e-20bc-4308-a86b-2bdb6aad8a23.1532135.rsem.isoforms.results	c04657d2-b71b-4402-82fa-02747cce331d	c71.9	1929	null	null	null	null	null	null	null	Primary Tumor	notreported	27831	dead	null	111.0	null	111.0	null	null	0d780df1-88d7-50c0-9928-7f1ba79654a9	c71.9	notreported	-27831	notreported	notreported
LGG	c71.0	male	notreported	nothispanicorlatino	white	LGG_unc.edu.5acf54e5-2288-4b40-b6f1-3ce549eceb36.2029042.rsem.isoforms.results	38f4b9f3-6709-40ff-9a81-5fa2111b1ce6	c71.0	1949	null	null	null	null	null	null	null	Primary Tumor	notreported	22948	alive	null	null	null	738.0	null	null	f15ab57f-5079-5386-9a7b-9dfb1a8f2e1c	c71.0	notreported	-22948	notreported	notreported
BLCA	c67.9	male	stageiii	nothispanicorlatino	white	BLCA_unc.edu.aa3e32f5-11ad-462a-aa5b-f477cfab3f4f.2512640.rsem.isoforms.results	25eaf3f9-c364-423c-aaae-925e7b393afc	c67.9	1938	null	72.0	null	null	0.002551020408163265	null	168.0	Primary Tumor	notreported	25259	alive	null	null	null	2886.0	null	null	314fc1b4-26d6-5fbf-86d9-3337c46c4ab3	c67.9	notreported	-25259	notreported	notreported
LGG	c71.0	female	notreported	nothispanicorlatino	white	LGG_unc.edu.12391798-07e4-44bd-9689-db2f95f6d710.1673483.rsem.isoforms.results	fbe32b94-b3ba-4a56-aeba-4cffe8de2da4	c71.0	1980	null	null	null	null	null	null	null	Primary Tumor	notreported	10790	alive	null	null	null	1359.0	null	null	b07e96c3-742f-5f5a-9b64-558ee2f14ec4	c71.0	notreported	-10790	notreported	notreported
GBM	c71.9	male	notreported	nothispanicorlatino	white	GBM_unc.edu.06fcbf45-4b5a-4c5a-976e-9b7bf57479dd.1545148.rsem.isoforms.results	35a7e49e-747b-45ce-9a07-3a5faba0ca94	c71.9	1964	null	null	null	null	null	null	null	Primary Tumor	notreported	16301	dead	null	77.0	null	77.0	null	null	b6d50cb3-6104-5cd7-a485-e1825e05aed9	c71.9	notreported	-16301	notreported	notreported
GBM	c71.9	female	notreported	nothispanicorlatino	white	GBM_unc.edu.3a5d8c95-260e-471a-bdf8-2fa489a069d8.1542750.rsem.isoforms.results	c34760a2-f70e-48c4-a7c2-eb359f8aeb71	c71.9	1932	null	null	null	null	null	null	null	Primary Tumor	notreported	27764	dead	null	142.0	null	142.0	null	null	dbeee282-bc4c-5982-80c8-6e37798d99b3	c71.9	notreported	-27764	notreported	notreported
THCA	c73	female	stagei	nothispanicorlatino	white	THCA_unc.edu.594a61ec-d2f1-4bc3-a16f-6f33cb1012c5.1455825.rsem.isoforms.results	e9ccf355-e68a-489c-a914-31b766bd0aef	c73.9	1966	null	null	null	null	null	null	null	Primary Tumor	notreported	16217	alive	null	null	null	1737.0	null	null	3d49c9e6-ae58-5f72-b104-7de1a73b65e4	c73.9	notreported	-16217	notreported	notreported
LGG	c71.0	female	notreported	nothispanicorlatino	white	LGG_unc.edu.5e6fdaa5-ce70-4f0a-a2d8-d66854cb9875.2272110.rsem.isoforms.results	559a8f6f-dd60-43b7-ae09-16cc4206064c	c71.0	1991	null	null	null	null	null	null	null	Primary Tumor	notreported	8240	alive	null	null	null	336.0	null	null	bf001b69-f01a-5556-b154-75c36a149238	c71.0	notreported	-8240	notreported	notreported
BLCA	c67.9	male	stageii	nothispanicorlatino	white	BLCA_unc.edu.5d19bc28-408e-4dc6-bc4b-95b28fa0dddc.2307453.rsem.isoforms.results	f5c187ef-dc08-4466-932a-43aa33285673	c67.9	1958	null	88.0	null	null	0.0025992438563327033	null	184.0	Primary Tumor	notreported	19871	alive	null	null	null	691.0	null	null	647cf9c1-c15e-5033-8763-a5f01227f2df	c67.9	notreported	-19871	notreported	notreported
THCA	c73	female	stagei	nothispanicorlatino	white	THCA_unc.edu.a5d1ca87-47c3-4602-a591-9e4f4077417e.1662595.rsem.isoforms.results	b30f5b13-8cc9-48a0-93ea-3d49ce8a7d0d	c73.9	1978	null	null	null	null	null	null	null	Solid Tissue Normal	notreported	11735	alive	null	null	null	942.0	null	null	60014de8-25d1-5aa1-94b0-7defc51a7394	c73.9	notreported	-11735	notreported	notreported
GBM	c71.9	female	notreported	notreported	white	GBM_unc.edu.05a2eea8-f366-4ae7-80f3-03324fb6e66e.1545305.rsem.isoforms.results	c9e4f0bf-48fc-4600-9e03-314bc575273f	c71.9	1948	null	null	null	null	null	null	null	Primary Tumor	notreported	22686	dead	null	335.0	null	237.0	null	null	6d4e27c6-375a-5975-ad5f-2a35140292ce	c71.9	notreported	-22686	notreported	notreported
LGG	c71.0	female	notreported	nothispanicorlatino	white	LGG_unc.edu.4743ae20-4a24-475b-9d1a-3def852738b3.1816040.rsem.isoforms.results	81fb338f-1023-49aa-ac0f-ba763a6cd68c	c71.0	1985	null	null	null	null	null	null	null	Primary Tumor	notreported	9539	alive	null	null	null	76.0	null	null	7619f026-b326-5dce-affd-50ecb15c78eb	c71.0	notreported	-9539	notreported	notreported
THCA	c73	female	stageiii	nothispanicorlatino	blackorafricanamerican	THCA_unc.edu.bb6594c5-78de-49b5-996f-b38b3953e37a.1366807.rsem.isoforms.results	44465a32-8ee9-4575-94b8-0200ba7c5bd4	c73.9	1934	null	null	null	null	null	null	null	Primary Tumor	notreported	26817	alive	null	null	null	2900.0	null	null	8196853f-647e-509c-a3c0-45343d5dbb5c	c73.9	notreported	-26817	notreported	notreported
BLCA	c67.2	female	stageiv	nothispanicorlatino	blackorafricanamerican	BLCA_unc.edu.80cdd385-2a6a-4d59-81c7-f36786637323.1179620.rsem.isoforms.results	24f21425-b001-4986-aedf-5b4dd851c6ad	c67.2	1949	null	null	null	null	null	null	null	Primary Tumor	notreported	21551	dead	null	154.0	null	null	null	null	4e6ae2f0-eea3-53af-98a9-909433919e3a	c67.2	notreported	-21551	notreported	notreported
LGG	c71.0	male	notreported	nothispanicorlatino	white	LGG_unc.edu.32192c9c-9ab2-4709-b419-9beb7853ca2f.1411538.rsem.isoforms.results	e695b780-17f4-4e71-9120-7c6bcafaa3a7	c71.0	1952	null	null	null	null	null	null	null	Primary Tumor	notreported	16695	dead	null	1401.0	null	null	null	null	41ed343b-e060-540e-8f2c-4a93d4ff05f7	c71.0	notreported	-16695	notreported	notreported
GBM	c71.9	male	notreported	notreported	blackorafricanamerican	GBM_unc.edu.66b268a8-8652-4efc-8b2e-cf4ac6e00516.1542526.rsem.isoforms.results	9b9654c9-5a64-4a8e-b1f0-987437e6012e	c71.9	1954	null	null	null	null	null	null	null	Primary Tumor	notreported	17903	dead	null	29.0	null	29.0	null	null	60f722ec-f762-5f47-aadd-198e78a6a9ce	c71.9	notreported	-17903	notreported	notreported
OV	c56.9	female	notreported	nothispanicorlatino	white	OV_unc.edu.a32eba80-dbe9-464e-8102-5f77a3c7e177.1524837.rsem.isoforms.results	4ca9c0e8-75a7-4665-9d88-6dd2bb44b1e1	c56.9	1931	null	null	null	null	null	null	null	Primary Tumor	notreported	28100	alive	null	null	null	571.0	null	null	c87e9e32-50c5-54fd-8808-7ca57c0c7543	c56.9	notreported	-28100	notreported	notreported
LGG	c71.0	male	notreported	nothispanicorlatino	white	LGG_unc.edu.481d7eb6-90ed-4d5c-8b98-4a46777a1b8c.2277753.rsem.isoforms.results	c56fa247-ad97-4dce-a2d3-9bdfc5dc7b1b	c71.0	1983	null	null	null	null	null	null	null	Primary Tumor	notreported	10960	alive	null	null	null	522.0	null	null	2422c460-5d15-5ed9-8c03-f2fdf0c838c9	c71.0	notreported	-10960	notreported	notreported
LGG	c71.0	male	notreported	nothispanicorlatino	white	LGG_unc.edu.0eba2b04-9c32-4432-999a-ba53fe1137ea.2309708.rsem.isoforms.results	432fe4a9-2cdc-4323-aff0-59e2fdeda194	c71.0	1965	null	null	null	null	null	null	null	Primary Tumor	notreported	17025	alive	null	null	null	1245.0	null	null	5e6dcebf-89ca-5084-9a25-2cbaea9eacfc	c71.0	notreported	-17025	notreported	notreported
GBM	c71.9	male	notreported	nothispanicorlatino	white	GBM_unc.edu.616011aa-5aad-4078-85a6-e61f98d83363.1543093.rsem.isoforms.results	386b629e-fab1-4033-b088-45d6eeb4a13e	c71.9	1948	null	null	null	null	null	null	null	Primary Tumor	notreported	21884	dead	null	239.0	null	164.0	null	null	75ed0ded-48b1-5b33-9bb8-806a04447214	c71.9	notreported	-21884	notreported	notreported
OV	c56.9	female	notreported	nothispanicorlatino	white	OV_unc.edu.32d5209e-2ef2-4ef0-b902-585542d7d16b.2723508.rsem.isoforms.results	644a88a7-dc56-468a-af5c-60278aab7642	c56.9	1946	null	null	null	null	null	null	null	Primary Tumor	notreported	18733	dead	null	304.0	null	null	null	null	0f558703-06e8-564a-b36a-1cec509b1429	c56.9	notreported	-18733	notreported	notreported
LGG	c71.0	male	notreported	nothispanicorlatino	white	LGG_unc.edu.22609052-fb11-4d62-bbfa-4837b30f37ac.2271688.rsem.isoforms.results	823f571a-3cfd-465d-95fd-187a398ccf6f	c71.0	1955	null	null	null	null	null	null	null	Primary Tumor	notreported	18939	dead	null	648.0	null	null	null	null	e270420a-4930-501b-a163-820f1ed9879f	c71.0	notreported	-18939	notreported	notreported
LGG	c71.0	female	notreported	nothispanicorlatino	white	LGG_unc.edu.fcbffc2c-702c-4c32-95ae-beac08a46f2b.2330765.rsem.isoforms.results	f79420ca-b0ae-417c-95f7-d28c35760202	c71.0	1953	null	null	null	null	null	null	null	Primary Tumor	notreported	21761	alive	null	null	null	604.0	null	null	c7a7a135-a3c0-52eb-8d39-cf7fa5eea183	c71.0	notreported	-21761	notreported	notreported
LGG	c71.0	female	notreported	nothispanicorlatino	white	LGG_unc.edu.4ae49c4c-909f-48f0-8905-f27879c29426.1573771.rsem.isoforms.results	5017c115-39b8-4c5c-8be6-2cb298d7c641	c71.0	1980	null	null	null	null	null	null	null	Primary Tumor	notreported	10827	alive	null	null	null	442.0	null	null	203f7009-5196-5112-aea2-ec686b22a946	c71.0	notreported	-10827	notreported	notreported
LGG	c71.0	female	notreported	hispanicorlatino	white	LGG_unc.edu.10d307ce-8b3b-4486-b199-d2722a964a35.2401161.rsem.isoforms.results	135a149a-d153-465e-aa58-06d47bb18e00	c71.0	1968	null	null	null	null	null	null	null	Recurrent Tumor	notreported	15629	dead	null	954.0	null	null	null	null	25a8127b-675f-5005-a797-86e5e784e05e	c71.0	notreported	-15629	notreported	notreported
LGG	c71.0	female	notreported	nothispanicorlatino	white	LGG_unc.edu.be1d4fc0-02a0-4932-b836-bf68f89455c7.2334403.rsem.isoforms.results	14e6c57d-d78e-4660-a21f-4f90a4503080	c71.0	1956	null	null	null	null	null	null	null	Primary Tumor	notreported	21133	alive	null	null	null	428.0	null	null	60814d18-90c5-59f7-bc56-60a043d2b1d9	c71.0	notreported	-21133	notreported	notreported
OV	c56.9	female	notreported	nothispanicorlatino	white	OV_unc.edu.93a88ec4-e3ed-4e8d-a83c-3e6c4605e89e.1528161.rsem.isoforms.results	b4b49027-7815-4813-9769-a3fe3a26a37a	c56.9	1922	null	null	null	null	null	null	null	Primary Tumor	notreported	29585	dead	null	1157.0	null	1157.0	null	null	635b00aa-baef-5228-96e1-96c52b8da8a3	c56.9	notreported	-29585	notreported	notreported
LGG	c71.0	male	notreported	nothispanicorlatino	white	LGG_unc.edu.4d4f086b-9706-4fc5-b19b-33270daf8970.2408634.rsem.isoforms.results	61ff31a4-4fdc-476c-b456-2a2fed4bae6b	c71.0	1972	null	null	null	null	null	null	null	Primary Tumor	notreported	14660	alive	null	null	null	754.0	null	null	0c12f595-fac9-5f22-a83e-09461adf23bc	c71.0	notreported	-14660	notreported	notreported
BLCA	c67.4	male	stageiv	nothispanicorlatino	white	BLCA_unc.edu.36f98bd7-f044-4497-9d19-e25c8e847def.1821806.rsem.isoforms.results	da98be9d-7acf-43ce-aa24-38d1d2604506	c67.4	1947	null	102.0	null	null	0.003148148148148148	null	180.0	Primary Tumor	notreported	23713	alive	null	null	null	864.0	null	null	62fbfdb4-1e19-58a5-a404-ecbad204c5cb	c67.4	notreported	-23713	notreported	notreported
BLCA	c67.9	male	stageiv	nothispanicorlatino	white	BLCA_unc.edu.bf1d6946-63b3-48ca-add1-1c5ec5cafd22.1469139.rsem.isoforms.results	2e85c30c-c4c4-4096-9eef-4eb2c7d991a3	c67.9	1963	1.6986301369863013	null	null	null	null	null	null	Solid Tissue Normal	notreported	17682	alive	null	null	null	95.0	null	null	06be2b44-a613-51e1-8888-5bba9ffea8a0	c67.9	notreported	-17682	notreported	notreported
THCA	c73	female	stagei	hispanicorlatino	white	THCA_unc.edu.da1a8538-f647-463b-b927-f375f6a5b82f.1666553.rsem.isoforms.results	e28e35b1-eb58-45bb-b19a-958187227500	c73.9	1973	null	null	null	null	null	null	null	Primary Tumor	notreported	14332	alive	null	null	null	250.0	null	null	e0e20f95-b6b8-521f-adad-72accb1d7ed7	c73.9	notreported	-14332	notreported	notreported
OV	c56.9	female	notreported	nothispanicorlatino	white	OV_unc.edu.63c52e46-68cf-4dac-9bd7-37081daa4474.1565112.rsem.isoforms.results	5f60bc2d-738f-43fc-a3fb-61ec6e80e3d4	c56.9	1957	null	null	null	null	null	null	null	Primary Tumor	notreported	18189	alive	null	null	null	1785.0	null	null	013ba4e2-f2d0-5a07-a02e-5293a1da0678	c56.9	notreported	-18189	notreported	notreported
LGG	c71.0	male	notreported	hispanicorlatino	white	LGG_unc.edu.58e03221-6257-4bf1-984f-ee7a92418c13.2269546.rsem.isoforms.results	5119aceb-ad95-4904-b6c0-a0a4b42c17d0	c71.0	1953	null	null	null	null	null	null	null	Primary Tumor	notreported	19185	alive	null	null	null	2860.0	null	null	3314363b-c85e-5b33-9013-da6f7d1e79ae	c71.0	notreported	-19185	notreported	notreported
THCA	c73	female	stageii	notreported	notreported	THCA_unc.edu.4d2831b9-a52b-48a7-8541-7e23917a3b2f.1371180.rsem.isoforms.results	04ae6b65-8514-47fa-b573-ec1e067ff116	c73.9	1934	null	null	null	null	null	null	null	Primary Tumor	notreported	28424	alive	null	null	null	184.0	null	null	2428e24f-2353-5d5d-b50b-d94d300a62b1	c73.9	notreported	-28424	notreported	notreported
GBM	c71.9	female	notreported	nothispanicorlatino	white	GBM_unc.edu.db5b5af5-c221-4268-a978-e12c550989e7.1534361.rsem.isoforms.results	224235c1-5b6e-48d5-a5d1-777dfede0f1e	c71.9	1943	null	null	null	null	null	null	null	Primary Tumor	notreported	21776	dead	null	598.0	null	579.0	null	null	6620ac25-794a-5fe1-a8ba-faa3c9cb1bba	c71.9	notreported	-21776	notreported	notreported
OV	c56.9	female	notreported	nothispanicorlatino	white	OV_unc.edu.69bec2db-02c3-46ca-b17b-60eae9a1e0bf.1549939.rsem.isoforms.results	9e18238f-ae85-4b75-ae87-d92da9731a40	c56.9	1940	null	null	null	null	null	null	null	Primary Tumor	notreported	23826	alive	null	null	null	1233.0	null	null	e6fb200e-161a-5533-9fea-45b491af50d2	c56.9	notreported	-23826	notreported	notreported
LGG	c71.0	female	notreported	nothispanicorlatino	white	LGG_unc.edu.65955c38-4907-4b09-8ef6-94a6b9ff5817.1673870.rsem.isoforms.results	3d58ded1-b7cf-420c-ba59-5b424683f0df	c71.0	1979	null	null	null	null	null	null	null	Primary Tumor	notreported	10724	alive	null	null	null	1300.0	null	null	ff0ff16f-ceb2-5692-ab36-123b652d8d27	c71.0	notreported	-10724	notreported	notreported
LGG	c71.0	male	notreported	nothispanicorlatino	white	LGG_unc.edu.fec08c47-a556-4bef-a20f-b3985d30a500.2278111.rsem.isoforms.results	1a20f675-d9bb-48b0-a49f-d52270bd8973	c71.0	1980	null	null	null	null	null	null	null	Primary Tumor	notreported	12393	alive	null	null	null	320.0	null	null	cde6edea-c05e-5916-a15c-6589dc205283	c71.0	notreported	-12393	notreported	notreported
LGG	c71.0	male	notreported	nothispanicorlatino	white	LGG_unc.edu.da02270f-1191-446e-af1d-eabc4e1c3556.1509829.rsem.isoforms.results	cd69d509-a652-4257-a8d3-767296bbb4ec	c71.0	1986	null	null	null	null	null	null	null	Primary Tumor	notreported	9380	alive	null	null	null	73.0	null	null	c1c93084-f62d-56c2-9a20-0422560dd312	c71.0	notreported	-9380	notreported	notreported
OV	c56.9	female	notreported	nothispanicorlatino	white	OV_unc.edu.a56ccd4c-1959-44a9-968d-57e6c5bc0cf8.1524192.rsem.isoforms.results	b1c90c69-6149-4105-8182-ab9212f196be	c56.9	1950	null	null	null	null	null	null	null	Primary Tumor	notreported	20052	alive	null	null	null	928.0	null	null	a5bcf80f-e5db-5ab5-8c04-57c2093acb89	c56.9	notreported	-20052	notreported	notreported
BLCA	c67.4	male	stageii	nothispanicorlatino	white	BLCA_unc.edu.f68894de-6db1-472b-bbda-f1c6e60a818b.1927232.rsem.isoforms.results	4ff4d9fe-eab8-4ab3-9ae4-9f15b2581a8f	c67.4	1928	3.287671232876712	66.0	null	null	0.0024242424242424242	null	165.0	Primary Tumor	notreported	30764	alive	null	null	null	110.0	null	null	8f9cf785-c249-5fda-b3c7-d02646910ce0	c67.4	notreported	-30764	notreported	notreported
THCA	c73	female	stageii	nothispanicorlatino	white	THCA_unc.edu.47be93cb-ca80-4c0c-8ad3-90d2a323c571.1658627.rsem.isoforms.results	b1640709-8b2f-4cca-a2c0-55a1b4a1884b	c73.9	1957	null	null	null	null	null	null	null	Solid Tissue Normal	notreported	17302	alive	null	null	null	1256.0	null	null	be3596d6-b500-589b-9ef2-0946d0c08af2	c73.9	notreported	-17302	notreported	notreported
THCA	c73	male	stageiva	nothispanicorlatino	white	THCA_unc.edu.49fb1ab4-cd04-4985-99ee-2ddef8685cdc.1036010.rsem.isoforms.results	13c97cfb-eea2-4ae8-9209-c967d9642cef	c73.9	1960	null	null	null	null	null	null	null	Primary Tumor	notreported	18727	alive	null	null	null	1140.0	null	null	fff7510d-d30a-5a5e-9380-88f5eefa1c47	c73.9	notreported	-18727	notreported	notreported
THCA	c73	male	stagei	nothispanicorlatino	asian	THCA_unc.edu.3f428b20-16d5-4139-b8df-307165f37f8c.1381186.rsem.isoforms.results	2ce580e9-4d75-464c-b403-c9f4626d7aa4	c73.9	1984	null	null	null	null	null	null	null	Primary Tumor	notreported	9914	alive	null	null	null	835.0	null	null	8a68e156-9014-51d4-9ab1-15bb54822578	c73.9	notreported	-9914	notreported	notreported
THCA	c73	female	stageiii	nothispanicorlatino	white	THCA_unc.edu.32e30d37-eaad-411b-a008-f8b69ffd1624.1653233.rsem.isoforms.results	53ba15c0-780e-4153-a612-046f1b24b4b3	c73.9	1951	null	null	null	null	null	null	null	Primary Tumor	notreported	22556	alive	null	null	null	709.0	null	null	e81a45ff-8538-512c-a11a-46d26c69e274	c73.9	notreported	-22556	notreported	notreported
LGG	c71.0	female	notreported	nothispanicorlatino	white	LGG_unc.edu.43d6f3d2-2bd6-41e1-9d85-735f5f60e25a.2222000.rsem.isoforms.results	76cb16f9-37be-450e-b60a-5f0d0f1ec2bc	c71.0	1961	null	null	null	null	null	null	null	Primary Tumor	notreported	19149	alive	null	null	null	451.0	null	null	65dfa780-27c2-53e8-8112-df7ef3f6cf13	c71.0	notreported	-19149	notreported	notreported
OV	c56.9	female	notreported	nothispanicorlatino	white	OV_unc.edu.6bc296b8-ac74-4ff9-872d-5f7e4a3d011a.1549950.rsem.isoforms.results	02594e5e-8751-47c1-9245-90c66984b665	c56.9	1962	null	null	null	null	null	null	null	Primary Tumor	notreported	15650	alive	null	null	null	1919.0	null	null	1d60ab6b-010d-5421-9e30-11b38b71be6e	c56.9	notreported	-15650	notreported	notreported
BLCA	c67.4	male	stageiv	nothispanicorlatino	white	BLCA_unc.edu.dafc2af2-7b91-45a4-ae67-fe22ab060f06.1475151.rsem.isoforms.results	72d6e9aa-4a99-4fc9-a67b-4631e95fb043	c67.4	1942	2.191780821917808	103.0	null	null	0.00307563677625489	null	183.0	Primary Tumor	notreported	24979	dead	null	602.0	null	null	null	null	636f1c85-afcb-5dc2-a6ca-1469d789a7e8	c67.4	notreported	-24979	notreported	notreported
THCA	c73	female	stagei	notreported	notreported	THCA_unc.edu.bdf948a0-e974-40d0-b9ca-492e33943f40.1564312.rsem.isoforms.results	0f9b78c8-ee9d-4e60-939c-bdbe040c212d	c73.9	1980	null	null	null	null	null	null	null	Primary Tumor	notreported	10992	alive	null	null	null	723.0	null	null	4d6486cc-052d-52cc-aaf0-0ca6126340ee	c73.9	notreported	-10992	notreported	notreported
BLCA	c67.9	female	stageii	nothispanicorlatino	white	BLCA_unc.edu.227c6e50-7801-4fb6-91d3-eda4313024bb.2233573.rsem.isoforms.results	6c1ffaf7-fdae-4ab0-8dd1-6738937357ba	c67.9	1927	null	71.0	null	null	0.0026078971533516986	null	165.0	Primary Tumor	notreported	31571	dead	null	null	null	224.0	null	null	c1ac30a6-8fef-56ad-959d-9b3a4da010f9	c67.9	notreported	-31571	notreported	notreported
THCA	c73	male	stagei	nothispanicorlatino	white	THCA_unc.edu.6c9706bf-5c90-4436-a2d9-e8a6e08a2afb.1656262.rsem.isoforms.results	59681e8f-cf57-47b4-82e1-6be8ead9583e	c73.9	1980	null	null	null	null	null	null	null	Solid Tissue Normal	notreported	10044	alive	null	null	null	2689.0	null	null	d4fad914-211c-523b-92b6-f80fdec8012f	c73.9	notreported	-10044	notreported	notreported
BLCA	c67.9	male	stageiii	nothispanicorlatino	white	BLCA_unc.edu.2bdc311e-59cc-449f-b8dc-6662052678fd.1178831.rsem.isoforms.results	68bc786e-07c7-4964-bc88-5e2a8633626a	c67.9	1932	null	104.0	null	null	null	null	null	Primary Tumor	notreported	27533	dead	null	200.0	null	null	null	null	94660927-e346-5b40-8d70-0599b2fc0038	c67.9	notreported	-27533	notreported	notreported
LGG	c71.0	male	notreported	nothispanicorlatino	white	LGG_unc.edu.dbd2c9f3-4a21-4f9f-8346-62551d1c609b.1572869.rsem.isoforms.results	1b43ff0c-cf13-4620-b5c7-7abd9129612f	c71.0	1970	null	null	null	null	null	null	null	Primary Tumor	notreported	14279	alive	null	null	null	800.0	null	null	5e617d8e-cc21-5055-b71e-1ab53c20bb4e	c71.0	notreported	-14279	notreported	notreported
THCA	c73	female	stagei	notreported	white	THCA_unc.edu.4727bb20-6cda-414e-a0d0-0db7eeb583dc.1656118.rsem.isoforms.results	4bd61e82-5168-4222-a8c8-5124ab8fdd44	c73.9	1965	null	null	null	null	null	null	null	Solid Tissue Normal	notreported	14440	alive	null	null	null	3463.0	null	null	bbfea642-f575-589f-a72c-6ee07054d679	c73.9	notreported	-14440	notreported	notreported
THCA	c73	female	stagei	nothispanicorlatino	white	THCA_unc.edu.280de9cb-d098-46e8-b0ae-ccee52d8e5e4.1458756.rsem.isoforms.results	34d4cc10-b868-4e85-96a5-8680fc729e34	c73.9	1987	null	null	null	null	null	null	null	Primary Tumor	notreported	8989	alive	null	null	null	902.0	null	null	a7b164e4-6033-5e7f-b19e-8f9e4d20c936	c73.9	notreported	-8989	notreported	notreported
LGG	c71.0	male	notreported	nothispanicorlatino	white	LGG_unc.edu.ce5f6628-79c7-414b-8ad1-5714016c44ab.1653401.rsem.isoforms.results	0f0d9a7f-dd85-48aa-b5b2-deff5bb6bdeb	c71.0	1980	null	null	null	null	null	null	null	Primary Tumor	notreported	11357	alive	null	null	null	627.0	null	null	8f8689f8-4555-5fc6-904a-a06740903266	c71.0	notreported	-11357	notreported	notreported
GBM	c71.9	female	notreported	nothispanicorlatino	blackorafricanamerican	GBM_unc.edu.4aa70762-1a0e-4b38-be77-a89db0955193.1542636.rsem.isoforms.results	c184c3ca-7ad3-4202-b108-cb9fd5f5d947	c71.9	1951	null	null	null	null	null	null	null	Primary Tumor	notreported	21698	dead	null	460.0	null	351.0	null	null	cf729ac2-6473-51e4-a686-0f24d964d249	c71.9	notreported	-21698	notreported	notreported
LGG	c71.0	male	notreported	nothispanicorlatino	white	LGG_unc.edu.b64f0c76-9109-4e22-9070-0e43837a10b3.1859071.rsem.isoforms.results	c2c16878-b615-496c-8fcb-d49c97e15551	c71.0	1973	null	null	null	null	null	null	null	Primary Tumor	notreported	13145	alive	null	null	null	1189.0	null	null	fbc82525-6b46-5ff1-8028-a45c1ebf2e45	c71.0	notreported	-13145	notreported	notreported
BLCA	c67.9	female	stageiii	nothispanicorlatino	white	BLCA_unc.edu.88275e49-b282-414c-a941-9a77b991ff16.2508612.rsem.isoforms.results	3b464065-b2e9-4fb2-a7da-09e963fd43b3	c67.9	1946	null	70.0	null	null	0.0025099501595611173	null	167.0	Primary Tumor	notreported	24703	dead	null	254.0	null	147.0	null	null	c395b656-525c-5361-9ed0-36c1b54b701b	c67.9	notreported	-24703	notreported	notreported
OV	c56.9	female	notreported	nothispanicorlatino	white	OV_unc.edu.927c7b6d-3997-453b-81b1-b947341d5819.1526584.rsem.isoforms.results	1cc02c64-a34e-46ae-9bc7-5d50f2fefb31	c56.9	1963	null	null	null	null	null	null	null	Primary Tumor	notreported	16734	dead	null	1039.0	null	134.0	null	null	b7b88b39-5b78-5c15-a1fb-100e200d6917	c56.9	notreported	-16734	notreported	notreported
BLCA	c67.9	male	stagei	nothispanicorlatino	asian	BLCA_unc.edu.5071fd5a-8c44-4dfb-bcca-31885b033372.2469652.rsem.isoforms.results	aad167ab-4772-4616-afb3-265e00d4a3f0	c67.9	1963	null	53.0	null	null	0.0019467401285583105	null	165.0	Primary Tumor	notreported	18445	alive	null	null	null	398.0	null	null	781675dc-7b97-5118-ad9f-a8baa9301b57	c67.9	notreported	-18445	notreported	notreported
GBM	c71.9	male	notreported	nothispanicorlatino	white	GBM_unc.edu.49280503-5136-4c10-8e42-061abbb6fa05.1543553.rsem.isoforms.results	20bad0d5-3135-49a4-a119-fa7a1e56fd1b	c71.9	1935	null	null	null	null	null	null	null	Primary Tumor	notreported	27111	alive	null	null	null	167.0	null	null	c0ef57be-c62f-57e9-a16d-d49fd67fe026	c71.9	notreported	-27111	notreported	notreported
BLCA	c67.4	male	stageiii	nothispanicorlatino	white	BLCA_unc.edu.f89742f4-3575-4dd4-860f-ea9ab0321a48.1821696.rsem.isoforms.results	8d434cfb-2414-4d93-bf79-7b957bf040db	c67.4	1938	2.73972602739726	83.0	null	null	0.0028719723183391003	null	170.0	Primary Tumor	notreported	27045	alive	null	null	null	1108.0	null	null	81868eb4-2f71-5e17-985b-63370f7cc799	c67.4	notreported	-27045	notreported	notreported
THCA	c73	male	stagei	nothispanicorlatino	white	THCA_unc.edu.7a455c8a-e7d5-4c52-be07-c75dc51c2eb6.1656989.rsem.isoforms.results	c042a639-63c6-471b-a7c5-3fb4e12c4d12	c73.9	1970	null	null	null	null	null	null	null	Primary Tumor	notreported	14970	alive	null	null	null	1085.0	null	null	13abad8d-8e34-5d8c-aeaf-cfda07ca225e	c73.9	notreported	-14970	notreported	notreported
GBM	c71.9	male	notreported	nothispanicorlatino	white	GBM_unc.edu.9afb2af1-ea34-41ad-8a5d-5f24df2aba0b.1539846.rsem.isoforms.results	4776b959-d5f5-41ad-ab39-dba6031f6884	c71.9	1975	null	null	null	null	null	null	null	Primary Tumor	notreported	12685	dead	null	510.0	null	316.0	null	null	e346a255-fd8a-5291-912b-debf105f5b99	c71.9	notreported	-12685	notreported	notreported
BLCA	c67.0	male	stageiv	nothispanicorlatino	white	BLCA_unc.edu.e71db8e9-8ee2-46dc-935a-3274f1fab863.2234018.rsem.isoforms.results	08d13748-0946-49a1-8eb3-5afd1deebc84	c67.0	1950	2.4657534246575343	80.0	null	null	0.0026122448979591837	null	175.0	Primary Tumor	notreported	23236	dead	null	131.0	null	67.0	null	null	bdb1ef95-0ed2-535b-be0b-13fc38f7fb28	c67.0	notreported	-23236	notreported	notreported
THCA	c73	female	stagei	nothispanicorlatino	white	THCA_unc.edu.ac3b2403-e941-4b8a-8051-f29055c2428a.1898550.rsem.isoforms.results	c781b49e-d08f-49e6-b774-7cfe4100e92d	c73.9	1976	null	null	null	null	null	null	null	Primary Tumor	notreported	9859	alive	null	null	null	3571.0	null	null	ca59b53a-b4a3-57a7-8a60-c10eb103d1bc	c73.9	notreported	-9859	notreported	notreported
GBM	c71.9	male	notreported	notreported	white	GBM_unc.edu.6251a0df-d7ff-4a1b-9aa6-7d12ea04bd2c.1541940.rsem.isoforms.results	d9fcf27f-48e3-43fd-a8cf-3db246cf4221	c71.9	1939	null	null	null	null	null	null	null	Primary Tumor	notreported	25975	dead	null	343.0	null	275.0	null	null	1312dda5-89b6-534c-9e65-0d2455dba5de	c71.9	notreported	-25975	notreported	notreported
THCA	c73	male	stagei	notreported	notreported	THCA_unc.edu.8e124018-d6a5-47f8-9486-4c0fb0c7a622.1903446.rsem.isoforms.results	50ec4170-29ea-4ee9-8ce7-67ec78d1dc76	c73.9	1974	null	null	null	null	null	null	null	Primary Tumor	notreported	12912	alive	null	null	null	1840.0	null	null	241b8a06-f561-56e3-821b-a10d44ade351	c73.9	notreported	-12912	notreported	notreported
BLCA	c67.9	male	stageiv	nothispanicorlatino	white	BLCA_unc.edu.73a57b9f-d780-4556-bf25-b75c2f75340e.2503966.rsem.isoforms.results	dc321b92-7275-48c9-adeb-7670db3195ef	c67.9	1928	1.643835616438356	77.0	null	null	0.0026643598615916954	null	170.0	Primary Tumor	notreported	29100	dead	null	859.0	null	null	null	null	6b1b12ca-60a9-5b1b-813a-708b985fa0a6	c67.9	notreported	-29100	notreported	notreported
THCA	c73	male	stagei	nothispanicorlatino	white	THCA_unc.edu.a35f9f2f-2378-4825-812e-b55a9f21317f.1238428.rsem.isoforms.results	6675c581-297d-44cd-b80f-ae7e53d48228	c73.9	1955	null	null	null	null	null	null	null	Primary Tumor	notreported	20282	alive	null	null	null	352.0	null	null	fa8f414f-2d45-575f-9382-9e3a5897e99f	c73.9	notreported	-20282	notreported	notreported
THCA	c73	female	stagei	nothispanicorlatino	white	THCA_unc.edu.ef731ced-012b-4304-9cd4-3170cac294ad.1458743.rsem.isoforms.results	34d4cc10-b868-4e85-96a5-8680fc729e34	c73.9	1987	null	null	null	null	null	null	null	Solid Tissue Normal	notreported	8989	alive	null	null	null	902.0	null	null	a7b164e4-6033-5e7f-b19e-8f9e4d20c936	c73.9	notreported	-8989	notreported	notreported
LGG	c71.0	male	notreported	nothispanicorlatino	white	LGG_unc.edu.e6d20c89-a4d1-4c0f-b31d-8e1262e425d5.2322766.rsem.isoforms.results	d62d871b-4612-4bf4-b53c-9dd431e507a0	c71.0	1960	null	null	null	null	null	null	null	Primary Tumor	notreported	19234	alive	null	null	null	946.0	null	null	318736a2-76ae-5881-a940-59b002fda9b9	c71.0	notreported	-19234	notreported	notreported
LGG	c71.9	female	notreported	nothispanicorlatino	white	LGG_unc.edu.d7d5e04b-d563-418b-b312-0fe69b4bec29.1506697.rsem.isoforms.results	5ea230a6-77aa-4aa5-867c-09651d481d8b	c71.9	1961	null	null	null	null	null	null	null	Primary Tumor	notreported	13903	dead	null	3978.0	null	null	null	null	3edb67f5-821a-5fda-b986-1b6a79ca2ca5	c71.9	notreported	-13903	notreported	notreported
LGG	c71.0	female	notreported	nothispanicorlatino	white	LGG_unc.edu.0d3127f8-b7f0-4752-af62-4b093f959b27.2269613.rsem.isoforms.results	d81b9957-8c82-4006-b111-449fa9fb95ed	c71.0	1961	null	null	null	null	null	null	null	Primary Tumor	notreported	19142	alive	null	null	null	414.0	null	null	58762fdb-f35d-59fd-bef9-041ce6ef653e	c71.0	notreported	-19142	notreported	notreported
BLCA	c67.0	male	stageiv	nothispanicorlatino	white	BLCA_unc.edu.6aec2686-fcea-4d3e-8311-0b6ccad4c000.1469234.rsem.isoforms.results	7b98b829-fdc7-4719-bee9-c83f6154019c	c67.0	1946	1.643835616438356	87.0	null	null	0.002906879615089044	null	173.0	Primary Tumor	notreported	24408	dead	null	391.0	null	60.0	null	null	08898645-96f7-58cc-9337-3775c592604e	c67.0	notreported	-24408	notreported	notreported
LGG	c71.9	male	notreported	notreported	white	LGG_unc.edu.3ddd5316-2077-41c0-87fa-80be17d77f2b.1408400.rsem.isoforms.results	64cd17eb-c778-45e9-b994-02b68182e51b	c71.9	1960	null	null	null	null	null	null	null	Primary Tumor	notreported	18494	alive	null	null	null	1828.0	null	null	02ced0b7-132f-556e-8844-e90253d5447f	c71.9	notreported	-18494	notreported	notreported
LGG	c71.0	female	notreported	nothispanicorlatino	white	LGG_unc.edu.128dd28f-7f33-4fc2-a131-e64adbab6ba8.1413903.rsem.isoforms.results	152eaa99-05f5-4d30-bfb1-494a9a900e49	c71.0	1965	null	null	null	null	null	null	null	Primary Tumor	notreported	11427	dead	null	2286.0	null	null	null	null	dbe89b4b-690f-5c9a-bc66-2598b697bafb	c71.0	notreported	-11427	notreported	notreported
BLCA	c67.9	male	stageii	nothispanicorlatino	white	BLCA_unc.edu.57eda6ed-26b0-4bf6-98ad-80f4872b9832.1328736.rsem.isoforms.results	3d644eaf-82fc-4bc7-93b7-3e600e8c6511	c67.9	1937	null	88.0	null	null	0.002940292024457884	null	173.0	Primary Tumor	notreported	27091	alive	null	null	null	649.0	null	null	f42346cc-3ce2-5820-9527-770cdc9a28cb	c67.9	notreported	-27091	notreported	notreported
LGG	c71.0	male	notreported	hispanicorlatino	white	LGG_unc.edu.25aa5be1-62ec-4bd7-9509-bafbcd1adddb.2556027.rsem.isoforms.results	2f8c789e-bbd8-4753-a48b-6894c21162f8	c71.0	1981	null	null	null	null	null	null	null	Recurrent Tumor	notreported	10742	alive	null	null	null	1341.0	null	null	53c3462f-21cf-5e51-a578-53b8ccd41b12	c71.0	notreported	-10742	notreported	notreported
BLCA	c67.4	male	stageii	nothispanicorlatino	white	BLCA_unc.edu.fa1f8758-485c-4148-87b7-af891f652f48.2096388.rsem.isoforms.results	ab6580e4-5de9-4361-b06a-1d20e5571890	c67.4	1954	0.3835616438356164	103.0	null	null	0.00340203461487647	null	174.0	Primary Tumor	notreported	21007	alive	null	null	null	1115.0	null	null	eb71c449-9958-5bed-9dcf-8dc1bc8274c2	c67.4	notreported	-21007	notreported	notreported
LGG	c71.0	female	notreported	nothispanicorlatino	white	LGG_unc.edu.663ec986-6cdd-4b8c-8d16-5f2afb5caad0.1565922.rsem.isoforms.results	debe24c5-e4df-4e80-82f6-8f40395aa9e6	c71.0	1969	null	null	null	null	null	null	null	Primary Tumor	notreported	14767	alive	null	null	null	2107.0	null	null	a9f20f52-0f1d-52f9-a7d0-1a8ffaf98b75	c71.0	notreported	-14767	notreported	notreported
THCA	c73	male	stagei	hispanicorlatino	white	THCA_unc.edu.78f4de91-9cb5-40c4-af0d-f295468716fd.1660011.rsem.isoforms.results	4d1aec67-c345-4721-8ee8-356b0dff009b	c73.9	1991	null	null	null	null	null	null	null	Primary Tumor	notreported	7403	alive	null	null	null	595.0	null	null	ab05f3f9-34ee-5442-b582-c9e850179fbe	c73.9	notreported	-7403	notreported	notreported
THCA	c73	female	stagei	notreported	notreported	THCA_unc.edu.63f9e0c0-a0ff-4172-b19e-f87c1ef1d62a.1658954.rsem.isoforms.results	8cfc2589-b0ad-4fe6-8420-8f6fe0178bcc	c73.9	1978	null	null	null	null	null	null	null	Primary Tumor	notreported	12282	alive	null	null	null	1176.0	null	null	030a68ec-e3b7-5fd0-90ca-4fc6f94ee01e	c73.9	notreported	-12282	notreported	notreported
OV	c56.9	female	notreported	notreported	white	OV_unc.edu.1558c0c4-6bd2-482d-9c4e-2430a402dacc.1563357.rsem.isoforms.results	a2319490-b85d-4219-a1b0-fa1ec432d5c8	c56.9	1923	null	null	null	null	null	null	null	Recurrent Tumor	notreported	27417	dead	null	2621.0	null	2621.0	null	null	1911c0e4-d523-5681-9cc6-332707c4c25e	c56.9	notreported	-27417	notreported	notreported
LGG	c71.0	male	notreported	nothispanicorlatino	white	LGG_unc.edu.44b1a976-76e2-4c4d-9348-bb399d986794.2412343.rsem.isoforms.results	d61710c1-8ac3-44e3-b567-66288a6ab731	c71.0	1965	null	null	null	null	null	null	null	Recurrent Tumor	notreported	15931	dead	null	709.0	null	null	null	null	61d4291e-a89d-5161-91c6-cefb1a467053	c71.0	notreported	-15931	notreported	notreported
BLCA	c67.2	female	stageii	nothispanicorlatino	white	BLCA_unc.edu.c048b775-7679-424f-a008-8f7def9c0523.2503453.rsem.isoforms.results	4e702ca1-c0e0-4b9c-b9c7-7d7946818561	c67.2	1941	1.643835616438356	66.0	null	null	0.0026438070821983655	null	158.0	Primary Tumor	notreported	26560	alive	null	null	null	457.0	null	null	7d95200d-f19f-583e-979f-8a785ae4cbf7	c67.2	notreported	-26560	notreported	notreported
BLCA	c67.2	male	stageiii	nothispanicorlatino	white	BLCA_unc.edu.d9954580-b237-40a2-b4a3-3ce2482f8da2.2469528.rsem.isoforms.results	f90cff19-1c16-4514-8bc1-169539d01fca	c67.2	null	1.36986301369863	133.0	null	null	0.004150931618863331	null	179.0	Primary Tumor	notreported	17885	alive	null	null	null	899.0	null	null	637fb9bb-33af-5127-975e-1304bdd5a133	c67.2	notreported	-17885	notreported	notreported
BLCA	c67.9	female	stageiii	notreported	notreported	BLCA_unc.edu.a9321523-588e-40f2-95d2-2501fd1b23ee.2512459.rsem.isoforms.results	f6d916b0-8e4c-49cb-a0d4-883908f3284f	c67.9	1941	1.2328767123287672	80.0	null	null	0.0025826446280991736	null	176.0	Primary Tumor	notreported	21848	dead	null	3183.0	null	3148.0	null	null	2aae77f9-7847-5b4d-bf34-f375100e9132	c67.9	notreported	-21848	notreported	notreported
BLCA	c67.9	male	stageiv	nothispanicorlatino	white	BLCA_unc.edu.9192d03e-87ee-424a-90fa-7e66c3b6abe3.2544891.rsem.isoforms.results	c04cc413-95b0-4b56-af55-9596a5ead4a6	c67.9	1943	0.2191780821917808	90.0	null	null	0.0026583175803402644	null	184.0	Primary Tumor	notreported	24267	dead	null	211.0	null	null	null	null	a4754bd3-61cc-5605-b231-cb40afc62690	c67.9	notreported	-24267	notreported	notreported
OV	c56.9	female	notreported	nothispanicorlatino	asian	OV_unc.edu.ccd83080-7a51-4952-b4af-d13e9c182bc0.1522979.rsem.isoforms.results	756f6768-e69a-4fe9-aa41-7c58aabe4577	c56.9	1956	null	null	null	null	null	null	null	Primary Tumor	notreported	19258	dead	null	1650.0	null	119.0	null	null	46631da2-f6dd-5b78-8999-4f18d5131f9c	c56.9	notreported	-19258	notreported	notreported
THCA	c73	female	stagei	notreported	white	THCA_unc.edu.9b3cc625-ce0d-4c2d-a240-6f8664af5485.1655937.rsem.isoforms.results	c93c47f4-88f3-405a-85f4-ba9450b74522	c73.9	1979	null	null	null	null	null	null	null	Primary Tumor	notreported	11446	alive	null	null	null	847.0	null	null	aefb597c-6567-50b8-bca3-049a58291f6c	c73.9	notreported	-11446	notreported	notreported
LGG	c71.0	female	notreported	nothispanicorlatino	white	LGG_unc.edu.26c57d9f-1ee1-4c64-9b42-e00aed49d22d.1653862.rsem.isoforms.results	491ea65b-86c8-4686-99cf-f09505e20183	c71.0	1957	null	null	null	null	null	null	null	Primary Tumor	notreported	18956	alive	null	null	null	533.0	null	null	3147ea78-7c19-5b8d-9e53-870e4e866811	c71.0	notreported	-18956	notreported	notreported
THCA	c73	male	stagei	nothispanicorlatino	white	THCA_unc.edu.433015bc-0391-4556-9cb3-7aa2b660acb2.1328216.rsem.isoforms.results	c6f08366-f30d-45bd-b949-b59d2493995d	c73.9	1982	null	null	null	null	null	null	null	Primary Tumor	notreported	10667	alive	null	null	null	621.0	null	null	5488c382-ee4e-50f5-9eda-f644bde462ba	c73.9	notreported	-10667	notreported	notreported
BLCA	c67.9	male	stageiii	nothispanicorlatino	white	BLCA_unc.edu.06c37fa7-a8d3-4727-ba1d-69b584b8f585.2434766.rsem.isoforms.results	841b4582-a268-4a55-a9a2-47c7e5c3b69f	c67.9	1957	null	80.0	null	null	0.002524933720489837	null	178.0	Primary Tumor	notreported	17212	alive	null	null	null	3817.0	null	null	4c5acf31-43c8-580a-9963-aa18da2d1944	c67.9	notreported	-17212	notreported	notreported
OV	c56.9	female	notreported	nothispanicorlatino	white	OV_unc.edu.bce04e1e-a90c-4e81-bd16-415cccc9d7e2.1523627.rsem.isoforms.results	b520aae5-65a6-4b27-bc2a-10b02c7b1aeb	c56.9	1939	null	null	null	null	null	null	null	Primary Tumor	notreported	22646	dead	null	91.0	null	91.0	null	null	d7d5faf4-cb8e-5db8-9a9c-7894070b7ead	c56.9	notreported	-22646	notreported	notreported
THCA	c73	female	stagei	notreported	notreported	THCA_unc.edu.44a2e59d-3084-49eb-9516-aac67072ff12.1456233.rsem.isoforms.results	a65ec434-9ae0-453f-b440-08bf25558fd1	c73.9	1974	null	null	null	null	null	null	null	Primary Tumor	notreported	13761	alive	null	null	null	1227.0	null	null	f7cb1547-a68f-5da7-8542-c1de92bec678	c73.9	notreported	-13761	notreported	notreported
BLCA	c67.0	female	stageiii	nothispanicorlatino	white	BLCA_unc.edu.66132b23-e10a-49d9-89c5-129d7d98c17b.1474628.rsem.isoforms.results	6a2155b3-915c-41b1-b730-32e55e0c1fbd	c67.0	1928	null	71.0	null	null	0.0028804413972169257	null	157.0	Primary Tumor	notreported	30529	alive	null	null	null	428.0	null	null	ed523288-ac9e-552b-85bb-ee7a9aee7514	c67.0	notreported	-30529	notreported	notreported
OV	c56.9	female	notreported	nothispanicorlatino	white	OV_unc.edu.b6ed2184-0885-49ba-8b00-a3e57e4e5500.1524447.rsem.isoforms.results	ae914f23-87b9-4169-a7f7-a3483078c902	c56.9	1941	null	null	null	null	null	null	null	Primary Tumor	notreported	23772	alive	null	null	null	1212.0	null	null	c813f3eb-5dd8-5697-90d3-e91a0bd284b0	c56.9	notreported	-23772	notreported	notreported
LGG	c71.0	male	notreported	nothispanicorlatino	white	LGG_unc.edu.3eca387f-17e0-438d-8bae-f31f0ce7396d.2055819.rsem.isoforms.results	0536f465-1650-4411-823c-c660bc7f3adc	c71.0	1952	null	null	null	null	null	null	null	Primary Tumor	notreported	21811	dead	null	775.0	null	573.0	null	null	1dd56e7c-e8a7-5c89-9bc6-5d5231d44c7d	c71.0	notreported	-21811	notreported	notreported
LGG	c71.0	female	notreported	nothispanicorlatino	white	LGG_unc.edu.570cae57-25b0-401d-a911-da8d44e8b291.2278227.rsem.isoforms.results	fa878a23-cd20-44ef-b438-33033b5fb1fe	c71.0	1939	null	null	null	null	null	null	null	Primary Tumor	notreported	27232	alive	null	null	null	622.0	null	null	f4e42d4a-861b-5c53-824f-346db57e02bd	c71.0	notreported	-27232	notreported	notreported
OV	c56.9	female	notreported	notreported	white	OV_unc.edu.d3fbcdaa-11af-4233-9700-57c6e1628c4b.1520018.rsem.isoforms.results	c3e443b9-5dc5-4793-91e3-534f21485268	c56.9	1941	null	null	null	null	null	null	null	Primary Tumor	notreported	24545	alive	null	null	null	183.0	null	null	51ca0e22-1a4d-5b23-a0bb-f197df114dfe	c56.9	notreported	-24545	notreported	notreported
LGG	c71.0	female	notreported	nothispanicorlatino	white	LGG_unc.edu.fdced5ba-d0d5-4e07-b001-9d740cc48898.2269457.rsem.isoforms.results	4289a50b-c6be-495e-9826-53aeb67b6a22	c71.0	1990	null	null	null	null	null	null	null	Primary Tumor	notreported	8508	alive	null	null	null	502.0	null	null	f7080e21-22a0-5cf5-a0c9-c2c5810d7d66	c71.0	notreported	-8508	notreported	notreported
LGG	c71.0	female	notreported	nothispanicorlatino	white	LGG_unc.edu.25a13ca2-fb62-40aa-bec5-a8bf83a9360b.1569227.rsem.isoforms.results	3f6ffb08-32a9-4555-bfd1-243b7f526105	c71.0	1950	null	null	null	null	null	null	null	Primary Tumor	notreported	19616	alive	null	null	null	2869.0	null	null	89e676a6-e8b6-5d87-8d70-f704adb0607d	c71.0	notreported	-19616	notreported	notreported
LGG	c71.0	male	notreported	nothispanicorlatino	white	LGG_unc.edu.d90e0cc1-db21-49e6-87f4-a3328ffc1396.1532004.rsem.isoforms.results	ad202887-88b3-4e0f-a4c3-7e135d4cb258	c71.0	1941	null	null	null	null	null	null	null	Primary Tumor	notreported	25667	alive	null	null	null	1294.0	null	null	2f7927f0-263c-5ff3-9e7e-0324d9f0c149	c71.0	notreported	-25667	notreported	notreported
OV	c56.9	female	notreported	notreported	blackorafricanamerican	OV_unc.edu.bdd5afb1-a251-4541-bbbe-0fcd1126a3ce.1545640.rsem.isoforms.results	0a48873a-092a-4b25-822b-b0b3c18c08a8	c56.9	1922	null	null	null	null	null	null	null	Primary Tumor	notreported	26476	dead	null	1769.0	null	1769.0	null	null	f6efd774-9d62-56da-95f2-00366dfc8c27	c56.9	notreported	-26476	notreported	notreported
BLCA	c67.9	male	stageiv	nothispanicorlatino	white	BLCA_unc.edu.f7df4f7f-cd8e-44ba-b16f-203d6049c4fa.1782391.rsem.isoforms.results	917961e2-78ad-4182-9cdb-5efb09808111	c67.9	1947	1.36986301369863	109.0	null	null	0.0032548000836095433	null	183.0	Primary Tumor	notreported	23866	dead	null	324.0	null	106.0	null	null	c230e863-b361-5b21-a958-1d155e69c1d7	c67.9	notreported	-23866	notreported	notreported
LGG	c71.0	male	notreported	nothispanicorlatino	white	LGG_unc.edu.6cc3ae71-fe99-4dcb-b5c6-b4e8eb7b336c.2308992.rsem.isoforms.results	fe5c5c11-ef39-4907-9a70-67f37bb62fd7	c71.0	1970	null	null	null	null	null	null	null	Primary Tumor	notreported	15847	alive	null	null	null	414.0	null	null	2ef96df2-9701-5970-b3cd-53bae4dd35ce	c71.0	notreported	-15847	notreported	notreported
OV	c56.9	female	notreported	notreported	white	OV_unc.edu.19765b4f-458e-4f02-bf96-01498d80ac83.1563832.rsem.isoforms.results	e20ea417-7296-4da8-9fdb-71cd1f45153a	c56.9	1927	null	null	null	null	null	null	null	Primary Tumor	notreported	24682	dead	null	4624.0	null	4624.0	null	null	2a7a1bf4-1fe5-5d1d-ad8f-a06bdfbe0774	c56.9	notreported	-24682	notreported	notreported
LGG	c71.9	female	notreported	nothispanicorlatino	white	LGG_unc.edu.dad44966-2a17-4813-abf8-16b476984948.1377099.rsem.isoforms.results	9ed5af0e-c87f-46ff-81e7-9d3041b4034e	c71.9	1949	null	null	null	null	null	null	null	Primary Tumor	notreported	22348	dead	null	205.0	null	null	null	null	4894d7f4-3c09-5a68-a2d3-670ea1dfb9bb	c71.9	notreported	-22348	notreported	notreported
GBM	c71.9	female	notreported	notreported	white	GBM_unc.edu.ebadf417-08e8-4e89-bc8b-f7a74b0fc781.1534228.rsem.isoforms.results	d6de8d1c-e5ff-45cd-b53e-f943d2578713	c71.9	1956	null	null	null	null	null	null	null	Primary Tumor	notreported	18433	dead	null	1458.0	null	1458.0	null	null	76298f05-b17f-5dcb-97ac-6a6a71ce54d5	c71.9	notreported	-18433	notreported	notreported
THCA	c73	male	stageiii	nothispanicorlatino	white	THCA_unc.edu.b477c725-8d74-40ed-b4ee-27341a354fd1.1243766.rsem.isoforms.results	3cd2d4bd-8256-42fa-8272-db379d598007	c73.9	1940	null	null	null	null	null	null	null	Primary Tumor	notreported	25803	alive	null	null	null	919.0	null	null	83f67aee-6ed3-5d50-a94e-88b8395bc9eb	c73.9	notreported	-25803	notreported	notreported
LGG	c71.0	female	notreported	nothispanicorlatino	white	LGG_unc.edu.0aefc6e0-fd5e-430d-b4b7-e1d6c2168ae7.2315165.rsem.isoforms.results	5b199e7e-cc23-4065-88ad-fdfe3d0683d6	c71.0	1961	null	null	null	null	null	null	null	Primary Tumor	notreported	18415	alive	null	null	null	1115.0	null	null	8f51cf5c-9fba-5558-a6fc-5ad82046d1c1	c71.0	notreported	-18415	notreported	notreported
THCA	c73	female	stagei	nothispanicorlatino	white	THCA_unc.edu.3dd39419-c444-4d9a-b238-d3a935cdda1e.1660286.rsem.isoforms.results	0314b145-2f3a-4a90-a580-375b5f0a63a4	c73.9	1970	null	null	null	null	null	null	null	Primary Tumor	notreported	15068	alive	null	null	null	379.0	null	null	1163f78b-486d-532d-9b56-6879d7a281f1	c73.9	notreported	-15068	notreported	notreported
THCA	c73	female	stagei	notreported	notreported	THCA_unc.edu.be3c0583-3b18-4ab5-a87f-9b95b8cdbbad.1456290.rsem.isoforms.results	c9dc11ad-d3f5-4cdf-9c26-7139580b59af	c73.9	1964	null	null	null	null	null	null	null	Primary Tumor	notreported	17495	alive	null	null	null	444.0	null	null	db9dd924-753b-5f82-ab72-c8b41750ccc8	c73.9	notreported	-17495	notreported	notreported
LGG	c71.0	male	notreported	nothispanicorlatino	white	LGG_unc.edu.a51ba688-a2f0-4ad4-82eb-d549e99d1acb.2332313.rsem.isoforms.results	4250ac3c-c8b0-46ce-b9c8-7963bc386041	c71.0	1947	null	null	null	null	null	null	null	Primary Tumor	notreported	23263	dead	null	648.0	null	null	null	null	d80ae1a4-99af-575b-8c0c-4257b1d8896a	c71.0	notreported	-23263	notreported	notreported
OV	c56.9	female	notreported	notreported	white	OV_unc.edu.44948279-405d-42f6-ad29-465150ee6d85.1549880.rsem.isoforms.results	59b3fbfe-0b7c-41e5-b756-ee7e23730df5	c56.9	1938	null	null	null	null	null	null	null	Primary Tumor	notreported	25019	alive	null	null	null	1357.0	null	null	c9b6188c-636e-5f19-9261-7b9a70e42044	c56.9	notreported	-25019	notreported	notreported
GBM	c71.9	male	notreported	nothispanicorlatino	white	GBM_unc.edu.df36c4af-258e-4cfb-9550-d3580d097547.1537482.rsem.isoforms.results	f7ba48c8-46cf-40a9-8826-7e1f67d57171	c71.9	1954	null	null	null	null	null	null	null	Primary Tumor	notreported	18071	dead	null	395.0	null	50.0	null	null	db4122e2-d9f7-5c3c-a902-e2327611817b	c71.9	notreported	-18071	notreported	notreported
LGG	c71.0	female	notreported	hispanicorlatino	white	LGG_unc.edu.7f5d8015-9a38-4d1c-b63d-2d5a0b882259.1650154.rsem.isoforms.results	dcd45077-f068-490b-bdcc-4d4a62285116	c71.0	1969	null	null	null	null	null	null	null	Primary Tumor	notreported	15431	alive	null	null	null	487.0	null	null	bf2c1ce3-c399-549b-bcf9-ad26ce682bd5	c71.0	notreported	-15431	notreported	notreported
LGG	c71.0	male	notreported	nothispanicorlatino	white	LGG_unc.edu.2b35c088-4a94-44a1-9809-6666bc0c877f.2157312.rsem.isoforms.results	76e54ef6-1799-4fd9-bec3-0ea960e8461e	c71.0	1937	null	null	null	null	null	null	null	Recurrent Tumor	notreported	25809	dead	null	919.0	null	null	null	null	c701f1e9-9043-5154-8b99-e09aa4b6828f	c71.0	notreported	-25809	notreported	notreported
LGG	c71.0	female	notreported	nothispanicorlatino	white	LGG_unc.edu.e49a9619-3446-4862-8b91-d429d95197cb.2309310.rsem.isoforms.results	dc7ec60b-5ea5-48a4-8908-55caf9214272	c71.0	1960	null	null	null	null	null	null	null	Primary Tumor	notreported	17610	alive	null	null	null	1806.0	null	null	acdaf5da-e63c-5c2f-9e39-314e5fd94f7e	c71.0	notreported	-17610	notreported	notreported
BLCA	c67.9	male	stageiv	nothispanicorlatino	white	BLCA_unc.edu.4b3c1687-622c-4c9f-9fe7-25b197629133.2650298.rsem.isoforms.results	9883c38f-87bf-4421-bfc0-1b1001f8159c	c67.9	1935	5.917808219178082	91.0	null	null	0.0030405292525644023	null	173.0	Primary Tumor	notreported	28457	alive	null	null	null	893.0	null	null	a730f3f4-0822-59c1-a0c4-4020b1342b86	c67.9	notreported	-28457	notreported	notreported
THCA	c73	female	stageiva	nothispanicorlatino	asian	THCA_unc.edu.5141d525-ef8b-4cdb-b69e-5292017bf190.1816966.rsem.isoforms.results	dff3c4f1-9009-4111-9fc2-3834f8f7dbdd	c73.9	1959	null	null	null	null	null	null	null	Primary Tumor	notreported	19640	alive	null	null	null	455.0	null	null	a2440e47-0ae7-5592-9e67-2d136bff35bd	c73.9	notreported	-19640	notreported	notreported
OV	c56.9	female	notreported	notreported	white	OV_unc.edu.03b8480f-d19e-43e4-8a09-f9230c525c1e.1552055.rsem.isoforms.results	d77ef9cf-f8e6-4ee9-8d4f-1106885f6b06	c56.9	1930	null	null	null	null	null	null	null	Primary Tumor	notreported	24668	dead	null	787.0	null	787.0	null	null	049c7bc3-3d4a-5872-8d4a-eaffbf8187f5	c56.9	notreported	-24668	notreported	notreported
OV	c56.9	female	notreported	notreported	white	OV_unc.edu.4c19d12e-0160-4d01-b621-65335156488b.1550427.rsem.isoforms.results	3018efe7-13a1-47ae-a726-8fc967c73841	c56.9	1932	null	null	null	null	null	null	null	Primary Tumor	notreported	24939	dead	null	863.0	null	863.0	null	null	2a0f08c5-3c4b-577d-927e-0626042b4204	c56.9	notreported	-24939	notreported	notreported
THCA	c73	female	stageiii	nothispanicorlatino	white	THCA_unc.edu.cf19f287-ebc8-4be0-a619-cb26e7d5a671.1899303.rsem.isoforms.results	6e1c9ac8-eead-4db9-8f30-ef3591daf78b	c73.9	1958	null	null	null	null	null	null	null	Primary Tumor	notreported	17789	alive	null	null	null	3267.0	null	null	12776009-bd0f-51a1-a06e-4d482a67de7e	c73.9	notreported	-17789	notreported	notreported
OV	c56.9	female	notreported	notreported	white	OV_unc.edu.e496319b-df71-44a0-bfa6-90f50ae54654.1517529.rsem.isoforms.results	9af2248a-d86a-4277-93b4-8eba5a39bd3c	c56.9	1937	null	null	null	null	null	null	null	Primary Tumor	notreported	24407	dead	null	1736.0	null	1736.0	null	null	a00f2045-a1f8-5198-8f98-26c7090ec6c5	c56.9	notreported	-24407	notreported	notreported
LGG	c71.0	male	notreported	nothispanicorlatino	white	LGG_unc.edu.11a26b32-d4df-468f-9a17-b89fba51cf88.1714503.rsem.isoforms.results	58de25d5-8a32-4412-866b-acac2e321bfa	c71.0	1954	null	null	null	null	null	null	null	Primary Tumor	notreported	20175	alive	null	null	null	494.0	null	null	42ad05f5-a7ff-52a2-9c7c-dc031f399733	c71.0	notreported	-20175	notreported	notreported
THCA	c73	female	stageiii	notreported	notreported	THCA_unc.edu.e40f49f2-c949-4260-ae96-5913ab2fb0a9.1566160.rsem.isoforms.results	b3b7d701-ec84-4018-a3ce-f59198b35767	c73.9	1963	null	null	null	null	null	null	null	Primary Tumor	notreported	17613	alive	null	null	null	0.0	null	null	c65bc9e5-ebb0-5ac0-b961-b9de80641564	c73.9	notreported	-17613	notreported	notreported
THCA	c73	female	stageiii	nothispanicorlatino	white	THCA_unc.edu.c687adc4-afe5-4db9-a488-ff52735ab090.1216291.rsem.isoforms.results	061fab24-727a-4551-a205-89eeb9f530ea	c73.9	1946	null	null	null	null	null	null	null	Primary Tumor	notreported	23951	alive	null	null	null	1092.0	null	null	5c12c6d5-dfbe-5e8d-b901-6fe103d699ec	c73.9	notreported	-23951	notreported	notreported
OV	c56.9	female	notreported	nothispanicorlatino	white	OV_unc.edu.cc5e2498-a9e6-48be-bbda-9aa101546ca4.1520241.rsem.isoforms.results	e9483296-cb91-497a-b955-39a3c3289dac	c56.9	1959	null	null	null	null	null	null	null	Primary Tumor	notreported	16725	dead	null	1720.0	null	null	null	null	79a5c305-99a7-5b90-b77c-918193fb98fb	c56.9	notreported	-16725	notreported	notreported
THCA	c73	male	stagei	nothispanicorlatino	white	THCA_unc.edu.51c0f97a-c059-4688-8e48-7b9975cd4b17.1658295.rsem.isoforms.results	d4355111-3abb-40f0-bdb7-b9eaa39dc771	c73.9	1963	null	null	null	null	null	null	null	Primary Tumor	notreported	15366	alive	null	null	null	2035.0	null	null	bafc4c7e-9751-5c80-af68-4e472f91a3fb	c73.9	notreported	-15366	notreported	notreported
OV	c56.9	female	notreported	nothispanicorlatino	white	OV_unc.edu.37037dcf-fa69-4cd3-b83d-e474d69059b4.1555085.rsem.isoforms.results	4e6f88de-7624-4719-8234-4c9e5b2e2988	c56.9	1958	null	null	null	null	null	null	null	Primary Tumor	notreported	18599	alive	null	null	null	92.0	null	null	18cf8d27-34a1-592b-b795-f9dd1ad5ee52	c56.9	notreported	-18599	notreported	notreported
THCA	c73	male	stageii	hispanicorlatino	white	THCA_unc.edu.0e538879-75be-4f5b-8ec1-a513546af04b.1660562.rsem.isoforms.results	6435ea21-7214-40c5-9ccb-a1f22685a728	c73.9	1939	null	null	null	null	null	null	null	Primary Tumor	notreported	23043	alive	null	null	null	4017.0	null	null	081a2099-977c-5162-92c3-ecf08ecd47b2	c73.9	notreported	-23043	notreported	notreported
OV	c56.9	female	notreported	notreported	white	OV_unc.edu.52908652-f29a-4517-8ff6-6f4cd31c691b.1564921.rsem.isoforms.results	bbad2efe-e9c7-4f8f-924b-ebbbe4c181d4	c56.9	1963	null	null	null	null	null	null	null	Primary Tumor	notreported	17009	alive	null	null	null	148.0	null	null	4422c00b-d710-52d1-b3c3-a3b6879dd792	c56.9	notreported	-17009	notreported	notreported
LGG	c71.0	female	notreported	nothispanicorlatino	blackorafricanamerican	LGG_unc.edu.0c179490-c0fc-4ac1-abdb-f5256abf1ef6.2340734.rsem.isoforms.results	75dbc8fb-4db8-4764-824c-eccf3a223884	c71.0	1942	null	null	null	null	null	null	null	Primary Tumor	notreported	21341	dead	null	1578.0	null	null	null	null	f0bb2fb4-506b-567b-9359-7f429967cd9e	c71.0	notreported	-21341	notreported	notreported
OV	c56.9	female	notreported	notreported	white	OV_unc.edu.d1603029-2b45-4c5c-b313-8846d0ebdbdb.1520321.rsem.isoforms.results	f9c835db-2ab6-4bf5-826f-48723493c0ec	c56.9	1958	null	null	null	null	null	null	null	Primary Tumor	notreported	17530	dead	null	555.0	null	555.0	null	null	cdcf923e-15c6-5ee7-9cac-bda5bcaad9b7	c56.9	notreported	-17530	notreported	notreported
BLCA	c67.9	male	stageii	nothispanicorlatino	white	BLCA_unc.edu.90c55ddf-3ac3-4599-80f6-e29e486d2070.1966503.rsem.isoforms.results	2088ac24-a8b4-49af-a954-2b78b88a6f66	c67.9	1929	null	null	null	null	null	null	null	Primary Tumor	notreported	30655	dead	null	278.0	null	197.0	null	null	6dca2b4c-4665-563d-af5f-397cdeaab47f	c67.9	notreported	-30655	notreported	notreported
BLCA	c67.4	male	stageiv	nothispanicorlatino	white	BLCA_unc.edu.7773fd96-8ab7-417b-befd-ea63dc596a7a.2032555.rsem.isoforms.results	0628e443-3d7f-4a38-9d2a-ebc7f4f7e11d	c67.4	1951	1.643835616438356	93.0	null	null	0.002688172043010753	null	186.0	Primary Tumor	notreported	22500	dead	null	550.0	null	407.0	null	null	4807ff2f-3a06-5633-9626-7faaf65f8028	c67.4	notreported	-22500	notreported	notreported
LGG	c71.0	female	notreported	nothispanicorlatino	white	LGG_unc.edu.0c562903-7b09-49f2-b59e-fa697d69f810.1420892.rsem.isoforms.results	14375753-a69f-41e0-b910-2bb8e84cc43a	c71.0	1975	null	null	null	null	null	null	null	Primary Tumor	notreported	8752	dead	null	3470.0	null	null	null	null	e23338b6-3e43-577d-92a5-a4561610b305	c71.0	notreported	-8752	notreported	notreported
THCA	c73	female	stageiii	nothispanicorlatino	white	THCA_unc.edu.3b8bd89b-9d4e-49a9-bc74-8d6c712d5dd8.1661849.rsem.isoforms.results	c77976b6-35ea-4623-a92a-6d9440a978e6	c73.9	1950	null	null	null	null	null	null	null	Primary Tumor	notreported	22824	alive	null	null	null	477.0	null	null	2cca2f25-f4fb-5a8e-b55f-4dbaaba8a7aa	c73.9	notreported	-22824	notreported	notreported
GBM	c71.9	male	notreported	nothispanicorlatino	white	GBM_unc.edu.d1431a36-5c68-4e6e-9aea-72afe374efd1.1538069.rsem.isoforms.results	0389b35b-651b-4776-b12a-d315a100f47c	c71.9	1943	null	null	null	null	null	null	null	Primary Tumor	notreported	21920	dead	null	1062.0	null	316.0	null	null	bf87b833-e161-5936-8cef-5c3adc698794	c71.9	notreported	-21920	notreported	notreported
BLCA	c67.2	male	stageii	nothispanicorlatino	white	BLCA_unc.edu.70c7f658-5208-4b3f-9767-27a3b06b8ddc.1389029.rsem.isoforms.results	f953dc5d-58bf-4936-b9fe-74b45e8c00e5	c67.2	1951	4.383561643835616	85.4	null	null	0.0028866955110870745	null	172.0	Primary Tumor	notreported	22237	dead	null	294.0	null	null	null	null	a5f19dfa-c7ad-5749-8579-98bf087e3af1	c67.2	notreported	-22237	notreported	notreported
BLCA	c67.9	male	stageiv	nothispanicorlatino	asian	BLCA_unc.edu.bd8b95cf-34c9-4bc1-98fd-6c7e1c20680b.2439869.rsem.isoforms.results	17ee3278-dc2a-4021-a903-e4ed11e3218b	c67.9	1926	null	62.0	null	null	0.0024835763499439193	null	158.0	Primary Tumor	notreported	28996	dead	null	200.0	null	null	null	null	b500cdf9-89f4-59bd-856d-2c1f011e34e2	c67.9	notreported	-28996	notreported	notreported
THCA	c73	female	stageiii	nothispanicorlatino	white	THCA_unc.edu.bf8240f0-9780-49b9-90fd-dd008629ecea.1665931.rsem.isoforms.results	b983a678-b0ae-42c2-8f37-d6ecaf07413b	c73.9	1962	null	null	null	null	null	null	null	Primary Tumor	notreported	18403	alive	null	null	null	495.0	null	null	b4cfcd53-c711-5fb1-9aa5-e5e66577d3b1	c73.9	notreported	-18403	notreported	notreported
THCA	c73	female	stageiva	notreported	white	THCA_unc.edu.b08d8be0-f28a-474a-991f-e7764e16b311.1901012.rsem.isoforms.results	e94dfd42-4fe4-48e9-aa62-422ae071413f	c73.9	1962	null	null	null	null	null	null	null	Primary Tumor	notreported	17963	alive	null	null	null	567.0	null	null	9c19a576-7ee6-506a-9326-db75a5dbcb43	c73.9	notreported	-17963	notreported	notreported
THCA	c73	female	stageiii	hispanicorlatino	white	THCA_unc.edu.5fb19476-c09c-450c-af54-8573971769b1.1816693.rsem.isoforms.results	39e68907-3ffb-4ca1-a955-db5fa2f0deb1	c73.9	1941	null	null	null	null	null	null	null	Primary Tumor	notreported	25837	alive	null	null	null	1181.0	null	null	2a21ea0b-78d0-5e95-9746-1cedce9d9a80	c73.9	notreported	-25837	notreported	notreported
BLCA	c67.9	female	stageiv	nothispanicorlatino	white	BLCA_unc.edu.283dae7a-c249-4f56-b8ae-e9a13e451269.2646906.rsem.isoforms.results	f78cb4fa-5548-40f8-b71b-663dde47f539	c67.9	1951	0.547945205479452	81.0	null	null	0.0028698979591836736	null	168.0	Primary Tumor	notreported	22741	dead	null	168.0	null	null	null	null	6e999e1f-9938-5160-a6ad-9dd9e165756b	c67.9	notreported	-22741	notreported	notreported
LGG	c71.0	male	notreported	nothispanicorlatino	white	LGG_unc.edu.89e158ef-3b5a-4d90-9206-b2200a5a343e.1669950.rsem.isoforms.results	b342e980-8383-4f1b-bf57-4098c37a536c	c71.0	1963	null	null	null	null	null	null	null	Primary Tumor	notreported	17843	alive	null	null	null	544.0	null	null	451a677d-1b8b-5bb7-b5a0-c4fdf85e8249	c71.0	notreported	-17843	notreported	notreported
THCA	c73	female	stageiii	nothispanicorlatino	white	THCA_unc.edu.f0e775db-aafa-45e0-8428-82d7456b4185.1816788.rsem.isoforms.results	5c118e15-1e48-42a6-8d29-179e6e71a26c	c73.9	1950	null	null	null	null	null	null	null	Primary Tumor	notreported	22830	alive	null	null	null	657.0	null	null	d5ac791c-e38d-540b-b069-61849457872f	c73.9	notreported	-22830	notreported	notreported
BLCA	c67.9	male	stageiii	nothispanicorlatino	white	BLCA_unc.edu.e68b253d-6149-4c42-a5b3-1ddc2448759b.1784310.rsem.isoforms.results	fae38579-5fe2-4d81-9729-39fde866d18c	c67.9	1939	2.7945205479452055	108.0	null	null	0.0030234315948601664	null	189.0	Primary Tumor	notreported	26825	alive	null	null	null	524.0	null	null	c94da13a-ff3f-579c-9756-4c8e82385264	c67.9	notreported	-26825	notreported	notreported
LGG	c71.0	female	notreported	nothispanicorlatino	white	LGG_unc.edu.77b73b66-5ad9-49f4-9e75-f242cd316e2e.2031863.rsem.isoforms.results	0557b788-5aed-4919-85eb-a503ad893d75	c71.0	1977	null	null	null	null	null	null	null	Primary Tumor	notreported	12851	alive	null	null	null	231.0	null	null	4cc53630-e7af-5380-9622-aed579082717	c71.0	notreported	-12851	notreported	notreported
OV	c56.9	female	notreported	nothispanicorlatino	white	OV_unc.edu.12c78d62-6045-4f77-bd84-9ab5a38f4635.1563614.rsem.isoforms.results	c435627c-159d-4a6d-a819-30abac24bf4d	c56.9	1934	null	null	null	null	null	null	null	Primary Tumor	notreported	24993	dead	null	1799.0	null	1732.0	null	null	c8695a7a-bbd7-5587-abe6-4896e3db73ba	c56.9	notreported	-24993	notreported	notreported
THCA	c73	female	stagei	nothispanicorlatino	white	THCA_unc.edu.13b585a4-2072-49c1-87fa-ad55d5447b6e.1328307.rsem.isoforms.results	dfe086e6-71a5-4131-9602-f20977bf7454	c73.9	1980	null	null	null	null	null	null	null	Primary Tumor	notreported	10000	alive	null	null	null	1676.0	null	null	89e46ea6-40f9-5ab1-b735-a3c48f0f0f20	c73.9	notreported	-10000	notreported	notreported
OV	c56.9	female	notreported	notreported	notreported	OV_unc.edu.4b073708-9525-4340-90dc-ede08ee24977.1550170.rsem.isoforms.results	67f526f1-def5-43b4-bc89-154baae190fc	c56.9	1964	null	null	null	null	null	null	null	Primary Tumor	notreported	16534	alive	null	null	null	133.0	null	null	cc622c11-e77b-5fd6-b673-baeb226d3ce6	c56.9	notreported	-16534	notreported	notreported
THCA	c73	female	stageiii	hispanicorlatino	white	THCA_unc.edu.3c93d676-52b4-4c4e-a19f-08b77ba1fd32.1379647.rsem.isoforms.results	229004af-14eb-442e-905e-61c842b3efa0	c73.9	1932	null	null	null	null	null	null	null	Primary Tumor	notreported	23406	dead	null	813.0	null	null	null	null	6dbf77da-2645-5618-be70-0da18d96e044	c73.9	notreported	-23406	notreported	notreported
BLCA	c67.4	female	stageiii	nothispanicorlatino	white	BLCA_unc.edu.94309b2e-c58c-4e2b-981d-0badb3872db7.2032608.rsem.isoforms.results	8da76432-3004-47e5-a474-bd94bd4c0b33	c67.4	1949	null	73.0	null	null	0.002383673469387755	null	175.0	Primary Tumor	notreported	23080	alive	null	null	null	251.0	null	null	adbf91cd-b46c-5d7d-974d-e4701cb50dba	c67.4	notreported	-23080	notreported	notreported
THCA	c73	female	stagei	nothispanicorlatino	white	THCA_unc.edu.f4b77689-800d-4a80-beee-afc74877a4ec.1664004.rsem.isoforms.results	bf193c4f-fbac-41bc-b1af-19b6ce856f0f	c73.9	1982	null	null	null	null	null	null	null	Primary Tumor	notreported	10956	alive	null	null	null	335.0	null	null	9040d4d6-cd7f-5cb1-b4ef-b85f7190a630	c73.9	notreported	-10956	notreported	notreported
LGG	c71.0	male	notreported	nothispanicorlatino	white	LGG_unc.edu.f1a80ad7-316b-4bf7-a428-3d46f498b571.1423180.rsem.isoforms.results	4ef429be-c345-4258-9b42-b56e215e1a2c	c71.0	1944	null	null	null	null	null	null	null	Primary Tumor	notreported	19906	dead	null	2000.0	null	null	null	null	2f86170b-36d6-563a-a7f3-f068d7b0fc9f	c71.0	notreported	-19906	notreported	notreported
THCA	c73	male	stageiva	nothispanicorlatino	white	THCA_unc.edu.2a2472eb-3407-495a-b7c0-d4a73c99e669.1222928.rsem.isoforms.results	dc4d8468-6f34-40cb-a826-8d582cd86fde	c73.9	1944	null	null	null	null	null	null	null	Primary Tumor	notreported	24415	alive	null	null	null	122.0	null	null	390861b5-2b55-56b3-91a2-cf1184a34f22	c73.9	notreported	-24415	notreported	notreported
THCA	c73	male	stageiv	nothispanicorlatino	white	THCA_unc.edu.d5887688-b311-4ddc-84d4-538750849401.1919146.rsem.isoforms.results	4fc8e011-4433-4537-b03f-457a3a70240f	c73.9	1935	null	null	null	null	null	null	null	Primary Tumor	notreported	27416	alive	null	null	null	1343.0	null	null	72505d5e-4e4a-54ea-8c36-817b20704c0d	c73.9	notreported	-27416	notreported	notreported
LGG	c71.0	male	notreported	notreported	white	LGG_unc.edu.65913e2c-bc8a-44b3-9f14-a4ca9c49042d.1977633.rsem.isoforms.results	0db80dff-5586-4d9f-b253-df82e6fd6901	c71.0	1977	null	null	null	null	null	null	null	Primary Tumor	notreported	12845	alive	null	null	null	630.0	null	null	0f70064a-a635-5b25-b876-6837bc2a84af	c71.0	notreported	-12845	notreported	notreported
OV	c56.9	female	notreported	nothispanicorlatino	white	OV_unc.edu.0814c20e-fe77-4ff9-ab5e-a8ae2f74069d.1551732.rsem.isoforms.results	565d06a1-3640-4274-8fb3-8cad7e578876	c56.9	1961	null	null	null	null	null	null	null	Primary Tumor	notreported	17855	alive	null	null	null	168.0	null	null	720e8667-af0a-5909-9705-68bab71ed9f5	c56.9	notreported	-17855	notreported	notreported
LGG	c71.0	male	notreported	nothispanicorlatino	white	LGG_unc.edu.9eaedfe9-a6f0-46e3-8961-7a222df9127c.2039202.rsem.isoforms.results	669605f6-39a1-4f8c-81dc-39430ff5f892	c71.0	1979	null	null	null	null	null	null	null	Primary Tumor	notreported	12111	alive	null	null	null	1012.0	null	null	7564a386-3d40-535b-bab1-bc46f15a449e	c71.0	notreported	-12111	notreported	notreported
GBM	c71.9	female	notreported	nothispanicorlatino	white	GBM_unc.edu.26200b50-c40c-4e09-89c4-083b873bcf25.1544792.rsem.isoforms.results	de7b7cac-f094-4d59-8651-e991e34ea093	c71.9	1925	null	null	null	null	null	null	null	Recurrent Tumor	notreported	26600	dead	null	225.0	null	151.0	null	null	3bec1d61-648e-555d-8b5a-70f33f68871f	c71.9	notreported	-26600	notreported	notreported
LGG	c71.0	male	notreported	nothispanicorlatino	white	LGG_unc.edu.cb3b19a0-fb0a-49c8-a4e1-c2e3215a192f.1677052.rsem.isoforms.results	c3c41fd2-f0d7-4f46-9e18-cce4626538c2	c71.0	1970	null	null	null	null	null	null	null	Primary Tumor	notreported	15092	alive	null	null	null	1387.0	null	null	47f35412-aa4c-5f3f-b57b-b90b46256c4b	c71.0	notreported	-15092	notreported	notreported
LGG	c71.9	male	notreported	nothispanicorlatino	white	LGG_unc.edu.b6e08ea4-8a3b-4e8e-9a3a-387e6fc6a94a.1411736.rsem.isoforms.results	691d5202-90cc-4e08-83a3-0620a89d3a4b	c71.9	1957	null	null	null	null	null	null	null	Primary Tumor	notreported	15481	dead	null	1251.0	null	null	null	null	3b444c4b-bc12-5ac1-a47f-2096a2411299	c71.9	notreported	-15481	notreported	notreported
LGG	c71.0	female	notreported	nothispanicorlatino	white	LGG_unc.edu.ba53832f-dfbc-4581-b7b1-cdc476174d72.1565858.rsem.isoforms.results	49967a57-7c12-46bb-8d71-cebbb17c9935	c71.0	1966	null	null	null	null	null	null	null	Primary Tumor	notreported	16460	alive	null	null	null	1078.0	null	null	c6d5ac03-def8-5a9f-a1bb-53fe36372ab8	c71.0	notreported	-16460	notreported	notreported
THCA	c73	male	stagei	hispanicorlatino	white	THCA_unc.edu.eeed9479-565a-44d2-8783-458aaae5d51a.1881154.rsem.isoforms.results	38d03e42-db98-43bc-bb3d-2580cf55a681	c73.9	1975	null	null	null	null	null	null	null	Primary Tumor	notreported	13635	alive	null	null	null	780.0	null	null	d720c5e9-b9ce-5c79-9e15-9e636e395d86	c73.9	notreported	-13635	notreported	notreported
THCA	c73	male	stageiii	nothispanicorlatino	white	THCA_unc.edu.e19479cc-ab66-4398-9733-ff15a9b52af1.1222952.rsem.isoforms.results	8c5aef43-341e-4a37-84eb-fd730eb957c7	c73.9	1950	null	null	null	null	null	null	null	Primary Tumor	notreported	22130	alive	null	null	null	1590.0	null	null	7896b845-b5f6-597c-834d-b51d20e9bea2	c73.9	notreported	-22130	notreported	notreported
THCA	c73	female	stagei	nothispanicorlatino	blackorafricanamerican	THCA_unc.edu.525589a6-6bb6-4736-aa49-4f06deb503d2.1215676.rsem.isoforms.results	eb15422b-cafd-4af2-973e-8c997a911170	c73.9	1938	null	null	null	null	null	null	null	Primary Tumor	notreported	26406	alive	null	null	null	1787.0	null	null	07de49d2-6e1a-5af7-a129-81fd6ca0c6db	c73.9	notreported	-26406	notreported	notreported
LGG	c71.2	female	notreported	nothispanicorlatino	white	LGG_unc.edu.66a0dece-b8d0-4d6a-a6d9-53985a507f77.1957612.rsem.isoforms.results	5e0748f1-990b-43a9-9ff1-6a667cc228a8	c71.2	1977	null	null	null	null	null	null	null	Primary Tumor	notreported	12131	alive	null	null	null	1412.0	null	null	15d2920f-3a1d-5fbc-980c-8e5ff58869d8	c71.2	notreported	-12131	notreported	notreported
LGG	c71.0	male	notreported	nothispanicorlatino	white	LGG_unc.edu.eecd47a0-bde3-438b-b87a-f4e440228579.1416643.rsem.isoforms.results	bbfb5399-8d43-4b75-bf90-23ec142697d7	c71.0	1970	null	null	null	null	null	null	null	Primary Tumor	notreported	13371	alive	null	null	null	1458.0	null	null	1306ccbf-16c3-57e5-9679-ef8b197775cf	c71.0	notreported	-13371	notreported	notreported
THCA	c73	female	stageiva	nothispanicorlatino	white	THCA_unc.edu.c262a55b-8cf2-4c47-a867-f010361e22ac.1658842.rsem.isoforms.results	ebbd54ad-7b97-4081-ad11-7f7f3ce74eef	c73.9	1936	null	null	null	null	null	null	null	Primary Tumor	notreported	27737	alive	null	null	null	92.0	null	null	c458553a-840e-5319-9b4d-5d0ff1a1348c	c73.9	notreported	-27737	notreported	notreported
BLCA	c67.3	male	stageiii	nothispanicorlatino	white	BLCA_unc.edu.4c4fbc19-727b-48b0-82e0-42ca8309f315.1384754.rsem.isoforms.results	5c4aebeb-fb6f-4d66-b24a-89ef20de971e	c67.3	1922	null	104.0	null	null	0.0031745062727022984	null	181.0	Primary Tumor	notreported	29037	alive	null	null	null	4343.0	null	null	a8c90a87-6940-5767-bb23-fe84b30728f1	c67.3	notreported	-29037	notreported	notreported
OV	c56.9	female	notreported	nothispanicorlatino	white	OV_unc.edu.74ad9d3e-97a9-419d-8842-3fb37d3f099a.1536125.rsem.isoforms.results	6ad8bc89-d8e9-48c2-bc25-c8e51f972b4d	c56.9	1936	null	null	null	null	null	null	null	Primary Tumor	notreported	23987	dead	null	1033.0	null	1033.0	null	null	75f56478-bab2-51ee-821d-9db5567f6b98	c56.9	notreported	-23987	notreported	notreported
THCA	c73	male	stagei	nothispanicorlatino	asian	THCA_unc.edu.95429e9c-6a48-4ed5-a4a1-44e0880d5cf4.1328615.rsem.isoforms.results	c83fb5e6-8af3-47e4-ae48-cee92dff9db7	c73.9	1968	null	null	null	null	null	null	null	Primary Tumor	notreported	15421	alive	null	null	null	176.0	null	null	9f6a7b35-46de-519e-a1c8-d1166bec632f	c73.9	notreported	-15421	notreported	notreported
THCA	c73	female	stageiii	nothispanicorlatino	white	THCA_unc.edu.89296277-231a-4808-bcd9-380af991cbf6.1283407.rsem.isoforms.results	4d9de9a1-7df1-412e-9f16-15dd51b4c5f5	c73.9	1955	null	null	null	null	null	null	null	Primary Tumor	notreported	20472	alive	null	null	null	950.0	null	null	416ea91e-cac4-523b-a29b-6f0c46516889	c73.9	notreported	-20472	notreported	notreported
BLCA	c67.4	male	stageii	nothispanicorlatino	white	BLCA_unc.edu.4a0b6e3c-a167-4ca6-876b-6fb82fa8fdb6.2115937.rsem.isoforms.results	741311b6-cb15-498f-932d-ca282e1db10d	c67.4	1936	null	110.0	null	null	0.0029530994120647532	null	193.0	Primary Tumor	notreported	27843	dead	null	191.0	null	null	null	null	c41a2f4c-6dfa-5c13-be4c-14d55967e025	c67.4	notreported	-27843	notreported	notreported
LGG	c71.0	female	notreported	nothispanicorlatino	white	LGG_unc.edu.c34a63cc-746b-4502-a1ff-d7bece07b679.1569205.rsem.isoforms.results	fc3b7596-f515-446f-81db-fed0154ca2c5	c71.0	1964	null	null	null	null	null	null	null	Primary Tumor	notreported	17432	alive	null	null	null	1201.0	null	null	8f81d7d4-3c9b-58af-91eb-5fc077577359	c71.0	notreported	-17432	notreported	notreported
OV	c56.9	female	notreported	notreported	white	OV_unc.edu.545867ef-1299-410d-bbbf-d6c189344b0f.1548251.rsem.isoforms.results	3fc8f799-5bd3-4f48-baf0-c458ce86ab7e	c56.9	1957	null	null	null	null	null	null	null	Primary Tumor	notreported	18846	alive	null	null	null	192.0	null	null	7ad436d5-5f18-51e6-a99d-d533a2c7e2cc	c56.9	notreported	-18846	notreported	notreported
THCA	c73	female	stagei	nothispanicorlatino	blackorafricanamerican	THCA_unc.edu.eab55e05-a92f-471a-88d4-7663d70d940b.1901294.rsem.isoforms.results	6a63961e-6ca4-45fa-93ee-65f7c392fcf0	c73.9	1978	null	null	null	null	null	null	null	Primary Tumor	notreported	11465	alive	null	null	null	1398.0	null	null	ce05f52a-952b-53d4-a508-a9a89912bd33	c73.9	notreported	-11465	notreported	notreported
BLCA	c67.9	male	stageii	nothispanicorlatino	white	BLCA_unc.edu.b1af0c13-8e8b-456f-9e4c-c8c22d8ac37f.2640779.rsem.isoforms.results	987e8157-fbea-40f3-aa01-0092d6cceb97	c67.9	1934	1.095890410958904	128.0	null	null	0.003583326334649086	null	189.0	Primary Tumor	notreported	26720	dead	null	1869.0	null	null	null	null	11c91899-3704-500b-af68-e2c05482f804	c67.9	notreported	-26720	notreported	notreported
LGG	c71.0	female	notreported	nothispanicorlatino	white	LGG_unc.edu.3e095f21-2bc5-4ee8-bf9f-0035164d2113.1374889.rsem.isoforms.results	178ab87c-0582-4b02-bf6b-3a4c59a5ee1b	c71.0	1932	null	null	null	null	null	null	null	Primary Tumor	notreported	24122	dead	null	37.0	null	null	null	null	22629218-d3b5-52b1-9a9c-f8db0feac530	c71.0	notreported	-24122	notreported	notreported
BLCA	c67.0	male	stageiv	nothispanicorlatino	white	BLCA_unc.edu.ca10d08d-3cc5-4171-9a70-66fdff3c0c3d.1181607.rsem.isoforms.results	419deaac-ea45-4bdd-9fa0-b5cd8429b44f	c67.0	1933	null	null	null	null	null	null	null	Primary Tumor	notreported	26778	dead	null	593.0	null	null	null	null	c8bf1857-b842-5c8f-99be-fddbb29a127c	c67.0	notreported	-26778	notreported	notreported
THCA	c73	male	stagei	nothispanicorlatino	white	THCA_unc.edu.ce84d560-9f99-4afe-9e54-d9b1f53c591e.1380032.rsem.isoforms.results	d60f6620-575d-47fe-83e8-80a6ad838bed	c73.9	1956	null	null	null	null	null	null	null	Primary Tumor	notreported	20058	alive	null	null	null	238.0	null	null	68f53f93-8091-5833-bf21-db0b616b3203	c73.9	notreported	-20058	notreported	notreported
THCA	c73	female	stageii	notreported	notreported	THCA_unc.edu.c3499c93-0cff-4d93-b1dc-c795a4d6b48f.1327964.rsem.isoforms.results	d3e75fb4-fb7c-4ebf-9c75-2be9ffd9f52d	c73.9	1965	null	null	null	null	null	null	null	Primary Tumor	notreported	17075	alive	null	null	null	983.0	null	null	c0ea6af8-c807-5786-bb75-6630348845fa	c73.9	notreported	-17075	notreported	notreported
OV	c56.9	female	notreported	notreported	white	OV_unc.edu.3bf24456-4b70-4313-a04d-19aba239108d.1565708.rsem.isoforms.results	4261267c-7042-4c6e-83ed-12fb401003fc	c56.9	1952	null	null	null	null	null	null	null	Primary Tumor	notreported	19969	dead	null	951.0	null	889.0	null	null	fcbce65c-5e58-502e-bbc5-5dce69cd809f	c56.9	notreported	-19969	notreported	notreported
THCA	c73	female	stagei	nothispanicorlatino	white	THCA_unc.edu.9b900191-bbf3-4c2a-9901-1f28c6db0f65.1216630.rsem.isoforms.results	1e63d4b3-1b49-4bb9-b64f-001273aae120	c73.9	1969	null	null	null	null	null	null	null	Solid Tissue Normal	notreported	15411	alive	null	null	null	623.0	null	null	0b3b9acc-95cb-51fa-ad5d-4288e8079f5a	c73.9	notreported	-15411	notreported	notreported
GBM	c71.9	male	notreported	nothispanicorlatino	white	GBM_unc.edu.76ad0a38-a2a2-4533-8baf-5f94c0c59a02.1540919.rsem.isoforms.results	4644a15f-3115-4f27-86b2-b092419431e1	c71.9	1948	null	null	null	null	null	null	null	Primary Tumor	notreported	23211	alive	null	null	null	139.0	null	null	e3834a48-5f8b-581e-b7f5-2a000befcf32	c71.9	notreported	-23211	notreported	notreported
BLCA	c67.6	male	stageiii	nothispanicorlatino	blackorafricanamerican	BLCA_unc.edu.2d83d812-8f9b-443b-8643-dd3104b5068e.2306985.rsem.isoforms.results	67cadffc-460b-4a2a-b182-3794421992b4	c67.6	1938	2.73972602739726	84.0	null	null	0.002454346238130022	null	185.0	Primary Tumor	notreported	26837	alive	null	null	null	1604.0	null	null	99b0aebe-42bd-56fa-82e6-0aeac049daf1	c67.6	notreported	-26837	notreported	notreported
LGG	c71.9	male	notreported	notreported	blackorafricanamerican	LGG_unc.edu.6ff35e89-30b4-447e-9ef5-b67210b7859d.1659527.rsem.isoforms.results	f86fa219-34e9-4812-8edf-2b66d7219779	c71.9	1964	null	null	null	null	null	null	null	Primary Tumor	notreported	15848	dead	null	639.0	null	null	null	null	76464009-0aac-5431-895a-5b205012ad05	c71.9	notreported	-15848	notreported	notreported
THCA	c73	female	stageii	nothispanicorlatino	white	THCA_unc.edu.d38a7386-1ace-4edd-a42c-d3d93c8ace02.1655423.rsem.isoforms.results	7ef22138-ac76-4846-b3bb-ddf1efb96531	c73.9	1946	null	null	null	null	null	null	null	Primary Tumor	notreported	24136	alive	null	null	null	658.0	null	null	c2e1aeec-6433-51e3-bc9f-1cf4b065389e	c73.9	notreported	-24136	notreported	notreported
OV	c56.9	female	notreported	notreported	white	OV_unc.edu.32de1e4d-198a-4616-8227-4d633c80124b.1555141.rsem.isoforms.results	196f4600-b6c9-4652-9f77-65c92883f8c1	c56.9	1958	null	null	null	null	null	null	null	Primary Tumor	notreported	18635	alive	null	null	null	2369.0	null	null	31073de8-aadc-57d6-99a1-0a6b4d438bb9	c56.9	notreported	-18635	notreported	notreported
OV	c56.9	female	notreported	notreported	blackorafricanamerican	OV_unc.edu.64e3f978-d213-45e2-bb52-e9b9a2032dc0.1548958.rsem.isoforms.results	b3511675-fd68-4745-8020-e290ca0fd115	c56.9	1949	null	null	null	null	null	null	null	Primary Tumor	notreported	20622	dead	null	1815.0	null	1815.0	null	null	17951518-166e-5b1e-b7a9-d3cda6b3bd1c	c56.9	notreported	-20622	notreported	notreported
OV	c56.9	female	notreported	notreported	white	OV_unc.edu.97c0b20f-ee65-42b2-af2d-92dcf48b2cd5.1526813.rsem.isoforms.results	2cb50c2d-e749-4172-b101-d975507435c5	c56.9	1945	null	null	null	null	null	null	null	Primary Tumor	notreported	19843	dead	null	524.0	null	524.0	null	null	dbe92bcb-69f3-5886-b674-14650afaf711	c56.9	notreported	-19843	notreported	notreported
LGG	c71.0	male	notreported	nothispanicorlatino	white	LGG_unc.edu.8204b99d-4224-4bb9-b297-413956b203ee.1578548.rsem.isoforms.results	c40ab957-fe46-43b1-992d-b4e2040a3f57	c71.0	1960	null	null	null	null	null	null	null	Primary Tumor	notreported	18084	alive	null	null	null	1219.0	null	null	8ad0e949-96df-54c9-9b26-9ddba89321fd	c71.0	notreported	-18084	notreported	notreported
THCA	c73	female	stagei	notreported	notreported	THCA_unc.edu.7cb4c793-df92-4168-86f3-b0a89f4ae248.1224301.rsem.isoforms.results	22eb9f00-6869-4d8f-b657-dfd64f81e9e9	c73.9	1971	null	null	null	null	null	null	null	Primary Tumor	notreported	14263	alive	null	null	null	549.0	null	null	e3fcb74b-97dd-53d2-a2ed-3ad74fcaf021	c73.9	notreported	-14263	notreported	notreported
THCA	c73	female	stagei	nothispanicorlatino	blackorafricanamerican	THCA_unc.edu.d84c9ccd-897b-436d-8cbe-165cd8a0d42b.1566444.rsem.isoforms.results	18a58e3e-f18e-45cf-86bc-1851abb9b3de	c73.9	1964	null	null	null	null	null	null	null	Primary Tumor	notreported	15876	alive	null	null	null	2877.0	null	null	ed8bdf5e-2bf8-55b2-98b4-9db3a7ea61f1	c73.9	notreported	-15876	notreported	notreported
OV	c56.9	female	notreported	nothispanicorlatino	white	OV_unc.edu.62fdea50-f152-4f43-9130-a93079b5e61f.1548613.rsem.isoforms.results	242943fe-1fa0-4a12-8f7e-9c6c4af1194d	c56.9	1958	null	null	null	null	null	null	null	Primary Tumor	notreported	18770	alive	null	null	null	145.0	null	null	6e4a13d0-dffc-5780-9f24-ee952362f22d	c56.9	notreported	-18770	notreported	notreported
BLCA	c67.9	female	stageii	nothispanicorlatino	white	BLCA_unc.edu.1be3a1d1-1300-4d9f-86d1-4b5faf7241fb.2503291.rsem.isoforms.results	1029514b-a32c-4c43-a440-a5ba2709f717	c67.9	1940	2.0821917808219177	54.0	null	null	0.002432322868339264	null	149.0	Primary Tumor	notreported	25484	alive	null	null	null	1714.0	null	null	90d91715-3969-50e7-9473-7b91822f0dd9	c67.9	notreported	-25484	notreported	notreported
LGG	c71.0	male	notreported	notreported	notreported	LGG_unc.edu.9fd5e9bf-8c29-4efc-bd33-1ed483153175.2408800.rsem.isoforms.results	cdd1fd4c-3427-496c-8391-4aeb6730d3cc	c71.0	1957	null	null	null	null	null	null	null	Primary Tumor	notreported	19991	alive	null	null	null	411.0	null	null	20096542-0b59-55ca-b05d-e0b5d91af39a	c71.0	notreported	-19991	notreported	notreported
THCA	c73	female	stagei	nothispanicorlatino	white	THCA_unc.edu.7a68c24f-b332-4746-b032-2a0322d02e9b.1458675.rsem.isoforms.results	884ad3b9-5350-4580-85f6-80ac05a6dcea	c73.9	1961	null	null	null	null	null	null	null	Primary Tumor	notreported	16895	alive	null	null	null	2449.0	null	null	671dd018-db05-548d-b8ee-a35dc1fdaa21	c73.9	notreported	-16895	notreported	notreported
LGG	c71.0	male	notreported	nothispanicorlatino	white	LGG_unc.edu.118ba2f8-3a61-41f3-9b4c-18a34181b1bb.1569110.rsem.isoforms.results	81622da8-9f36-4ea3-b223-d831d8c10f87	c71.0	1973	null	null	null	null	null	null	null	Primary Tumor	notreported	12266	dead	null	1339.0	null	null	null	null	0ec31e0e-f105-529e-86f9-6795ac8f51c0	c71.0	notreported	-12266	notreported	notreported
THCA	c73	male	stageii	nothispanicorlatino	notreported	THCA_unc.edu.39d90ab6-7625-41b2-b6d9-28e2347a7529.1366432.rsem.isoforms.results	05350770-2b5b-4c58-84ce-0917665ccb90	c73.9	1964	null	null	null	null	null	null	null	Primary Tumor	notreported	17410	alive	null	null	null	930.0	null	null	928b767e-9320-52a0-a968-8beaac064b74	c73.9	notreported	-17410	notreported	notreported
BLCA	c67.4	male	stageii	notreported	white	BLCA_unc.edu.db105bbd-3501-4916-b032-dd3480038d55.2503947.rsem.isoforms.results	35c7bb8a-7b5c-488d-9d3a-725b24d14478	c67.4	1930	null	78.0	null	null	0.002698961937716263	null	170.0	Primary Tumor	notreported	29457	dead	null	1270.0	null	710.0	null	null	daa94ab6-eeb8-58d0-b01b-0d95d3819477	c67.4	notreported	-29457	notreported	notreported
GBM	c71.9	male	notreported	nothispanicorlatino	white	GBM_unc.edu.3721666c-f46f-4b43-9f5d-b3cf85af176c.1543686.rsem.isoforms.results	f19850cb-50c4-4f3a-ba80-b1464958ffa8	c71.9	1940	null	null	null	null	null	null	null	Primary Tumor	notreported	24050	dead	null	419.0	null	null	null	null	211f3f36-59e2-5e29-95e1-fe9c28e3c9bb	c71.9	notreported	-24050	notreported	notreported
THCA	c73	female	stageiii	nothispanicorlatino	asian	THCA_unc.edu.9893b949-598f-4664-a72c-8495d0047bf0.1359553.rsem.isoforms.results	acba8d76-999a-4f6d-b3a4-8d7dd0f2bb52	c73.9	1950	null	null	null	null	null	null	null	Primary Tumor	notreported	22637	alive	null	null	null	1224.0	null	null	707b9ac9-e47a-5e0c-87c8-8563626c5995	c73.9	notreported	-22637	notreported	notreported
THCA	c73	female	stagei	notreported	notreported	THCA_unc.edu.3169d499-4b3f-4178-ad0e-865cb6a7864d.1468240.rsem.isoforms.results	105210cc-6fe3-4615-a582-475553e14272	c73.9	1980	null	null	null	null	null	null	null	Primary Tumor	notreported	11592	alive	null	null	null	254.0	null	null	0705be13-deea-509e-90e7-035374a9adaf	c73.9	notreported	-11592	notreported	notreported
THCA	c73	female	stageiva	nothispanicorlatino	white	THCA_unc.edu.08096d6f-0f8c-4107-b86a-61eb10feaddd.1458608.rsem.isoforms.results	085ffcdc-8600-42e2-852a-506465f716a2	c73.9	1962	null	null	null	null	null	null	null	Primary Tumor	notreported	18098	alive	null	null	null	831.0	null	null	b37af9bb-84c7-5f67-8cd5-b8576afba837	c73.9	notreported	-18098	notreported	notreported
LGG	c71.9	male	notreported	notreported	white	LGG_unc.edu.910af7ad-94b5-478e-a2ac-e9f524ef020b.1413060.rsem.isoforms.results	952dfd5d-e65a-4307-b6a9-2ed2b0d2d9ce	c71.9	1972	null	null	null	null	null	null	null	Primary Tumor	notreported	13565	dead	null	1106.0	null	552.0	null	null	f5f19e06-db25-5136-8a68-e5691046801f	c71.9	notreported	-13565	notreported	notreported
OV	c56.9	female	notreported	notreported	white	OV_unc.edu.c50cf5af-3375-4748-9894-1f9521f746da.1555672.rsem.isoforms.results	9ec86cbd-8c74-4697-90da-529ab91ab835	c56.9	1943	null	null	null	null	null	null	null	Primary Tumor	notreported	24469	alive	null	null	null	106.0	null	null	59f8614c-8ad2-570a-9e9e-134adc1741a0	c56.9	notreported	-24469	notreported	notreported
LGG	c71.0	male	notreported	nothispanicorlatino	white	LGG_unc.edu.e4762187-c19b-40d5-8385-ecb21f3ec6c3.1674050.rsem.isoforms.results	0ce8d92b-54e2-45d4-a551-0faf94a27d46	c71.0	1971	null	null	null	null	null	null	null	Primary Tumor	notreported	13314	alive	null	null	null	1752.0	null	null	e00827fc-010e-5035-979d-6e9ec17e6e14	c71.0	notreported	-13314	notreported	notreported
THCA	c73	female	stageiii	nothispanicorlatino	white	THCA_unc.edu.b918679c-600e-4cdb-a2df-40bea373a836.1250566.rsem.isoforms.results	097b9cf1-ec0c-487c-9ade-2bdab12eb4ca	c73.9	1958	null	null	null	null	null	null	null	Primary Tumor	notreported	18863	alive	null	null	null	1930.0	null	null	8b375df3-039b-53f4-ae25-1d11f0523e02	c73.9	notreported	-18863	notreported	notreported
GBM	c71.9	female	notreported	nothispanicorlatino	white	GBM_unc.edu.39580733-5ff1-43a1-b9fd-53b6f6e879bd.1544029.rsem.isoforms.results	884f867b-4a8b-4b67-8fe4-ab3f068be84e	c71.9	1938	null	null	null	null	null	null	null	Primary Tumor	notreported	26395	dead	null	108.0	null	108.0	null	null	1a78b7fe-0b6f-592d-ae0c-6bceced82b68	c71.9	notreported	-26395	notreported	notreported
THCA	c73	female	stagei	nothispanicorlatino	white	THCA_unc.edu.3e9ed7f0-3324-4c3c-85e2-dadb05025b94.1901564.rsem.isoforms.results	4f340c8c-5912-4257-b57d-c096da254c26	c73.9	1971	null	null	null	null	null	null	null	Primary Tumor	notreported	13928	alive	null	null	null	1056.0	null	null	5d4b6e1e-621c-56a8-919f-c8dd1d730954	c73.9	notreported	-13928	notreported	notreported
BLCA	c67.9	female	stageiii	nothispanicorlatino	white	BLCA_unc.edu.c270c34c-0cfd-410e-ab3c-231033196d25.1113415.rsem.isoforms.results	ebc094a6-cdc9-4c02-b8ec-a181b25a364d	c67.9	1953	0.821917808219178	51.0	null	null	0.0020690494543389184	null	157.0	Primary Tumor	notreported	20885	dead	null	223.0	null	null	null	null	d9b084dc-a65f-5913-923c-5e7ec4067300	c67.9	notreported	-20885	notreported	notreported
OV	c56.9	female	notreported	nothispanicorlatino	white	OV_unc.edu.877d96a2-6e5c-472c-b190-59fcfd1febb4.1542837.rsem.isoforms.results	bc2591b0-65d7-48c3-a5cc-783f67b65869	c56.9	1931	null	null	null	null	null	null	null	Primary Tumor	notreported	26200	dead	null	1583.0	null	1558.0	null	null	1b49c382-da56-568d-823a-34afc1fd6a96	c56.9	notreported	-26200	notreported	notreported
GBM	c71.9	female	notreported	nothispanicorlatino	white	GBM_unc.edu.6f9d76f0-ff61-4c58-ab2f-a7c84e9726e9.1540806.rsem.isoforms.results	878584ad-e6b6-493a-9f7f-3e284f5d9f68	c71.9	1952	null	null	null	null	null	null	null	Primary Tumor	notreported	20449	dead	null	175.0	null	98.0	null	null	cd752afc-492b-590d-a936-2a7452815b88	c71.9	notreported	-20449	notreported	notreported
THCA	c73	female	stagei	notreported	notreported	THCA_unc.edu.84fb7b6d-d38e-41b5-86e4-bb66266da91b.1327798.rsem.isoforms.results	0c50a2c2-1d4c-45ca-9127-f96d4db18daf	c73.9	1966	null	null	null	null	null	null	null	Primary Tumor	notreported	16439	alive	null	null	null	430.0	null	null	c491d381-174c-590a-b945-7b80ab055d07	c73.9	notreported	-16439	notreported	notreported
LGG	c71.0	male	notreported	nothispanicorlatino	white	LGG_unc.edu.17d328ce-367a-47c4-8f70-7f4644b37506.1674093.rsem.isoforms.results	49a87025-d0a4-44b3-b6ad-563bf9651093	c71.0	1948	null	null	null	null	null	null	null	Primary Tumor	notreported	21930	alive	null	null	null	210.0	null	null	5d190050-b7b2-584c-92b8-19e2a7b6be92	c71.0	notreported	-21930	notreported	notreported
THCA	c73	female	stagei	hispanicorlatino	white	THCA_unc.edu.29092f9c-dfac-467e-8432-c615b1da79ce.1660724.rsem.isoforms.results	90507baa-b716-4bcf-a18e-9d8ae97d809a	c73.9	1969	null	null	null	null	null	null	null	Primary Tumor	notreported	12777	alive	null	null	null	2988.0	null	null	832a45d4-01ad-51dc-9851-c0a7ddc8b42b	c73.9	notreported	-12777	notreported	notreported
THCA	c73	female	stagei	nothispanicorlatino	white	THCA_unc.edu.9a367db3-3cbf-4231-b6ea-686981433787.1381721.rsem.isoforms.results	e35b2928-8784-45d0-a71a-a2df161542fa	c73.9	1967	null	null	null	null	null	null	null	Primary Tumor	notreported	16371	alive	null	null	null	1148.0	null	null	4b61e7bb-88b0-5c93-b097-560890ff5bd1	c73.9	notreported	-16371	notreported	notreported
LGG	c71.0	male	notreported	nothispanicorlatino	white	LGG_unc.edu.8139b1af-5d6d-4fd4-b834-08cc4a18d0a9.2062308.rsem.isoforms.results	77396ae6-3838-47bf-aaae-f9a0f401ec7f	c71.0	1947	null	null	null	null	null	null	null	Primary Tumor	notreported	24276	dead	null	537.0	null	103.0	null	null	4cf4116f-03c4-5a3e-8bc5-db98bac24b09	c71.0	notreported	-24276	notreported	notreported
BLCA	c67.9	male	stageiv	nothispanicorlatino	white	BLCA_unc.edu.8c79f5ec-ce4f-4c86-8d1c-71495c276d74.1798444.rsem.isoforms.results	6b2d63f2-f390-4601-9640-f769f6e91bf4	c67.9	1934	null	84.0	null	null	0.002742857142857143	null	175.0	Primary Tumor	notreported	28052	alive	null	null	null	945.0	null	null	8d98d241-111a-5539-bfc1-982f57c84682	c67.9	notreported	-28052	notreported	notreported
BLCA	c67.4	male	stageiv	nothispanicorlatino	white	BLCA_unc.edu.97226f81-8074-4b17-bcc7-c74e51216706.2507946.rsem.isoforms.results	423b7fc5-3970-4c96-990d-96ad0842f1eb	c67.4	1929	0.5342465753424658	82.0	null	null	0.002837370242214533	null	170.0	Primary Tumor	notreported	30205	dead	null	1008.0	null	378.0	null	null	e66e857c-8b5e-5e0e-8546-f0b83a975b3c	c67.4	notreported	-30205	notreported	notreported
BLCA	c67.2	male	stageiii	nothispanicorlatino	white	BLCA_unc.edu.f4159732-6dd2-4614-b3e2-3a528fdfa527.2495439.rsem.isoforms.results	45eea556-e97b-4912-8aa9-7e5c709eb52b	c67.2	1940	null	100.0	null	null	0.0034602076124567475	null	170.0	Primary Tumor	notreported	22027	alive	null	null	null	5050.0	null	null	43b0cbd3-1c5b-5a13-a563-4cf6cb99ed42	c67.2	notreported	-22027	notreported	notreported
BLCA	c67.9	female	stageiv	notreported	notreported	BLCA_unc.edu.8f482c29-37fe-400f-b178-224765a0c037.1841660.rsem.isoforms.results	05935f1d-77c2-46ca-b87a-7a84bce38afd	c67.9	1937	1.8630136986301369	76.0	null	null	0.0026609712545078955	null	169.0	Primary Tumor	notreported	25202	dead	null	273.0	null	null	null	null	1f9cd203-5c80-5ed7-a4be-f3c73a84f45b	c67.9	notreported	-25202	notreported	notreported
LGG	c71.0	female	notreported	nothispanicorlatino	white	LGG_unc.edu.db75b249-f02e-47d8-ba4c-37a5ba7c4b33.1816336.rsem.isoforms.results	9b288f0e-5155-4736-bc22-e0e801d8b738	c71.0	1982	null	null	null	null	null	null	null	Primary Tumor	notreported	10950	alive	null	null	null	418.0	null	null	084b30d0-9a4d-5404-8aec-49a65e3a5ba8	c71.0	notreported	-10950	notreported	notreported
THCA	c73	male	stageiva	notreported	notreported	THCA_unc.edu.21d475d7-7f65-4961-8244-e43822cf6954.1364399.rsem.isoforms.results	1a4164d9-4484-452d-9382-8cbf896a870e	c73.9	1947	null	null	null	null	null	null	null	Primary Tumor	notreported	23723	alive	null	null	null	1256.0	null	null	84293ef5-b9c1-5e10-9dd9-68ca3078de8c	c73.9	notreported	-23723	notreported	notreported
BLCA	c67.9	male	stageiv	nothispanicorlatino	white	BLCA_unc.edu.86fcf82f-c97c-4f01-998d-8e6f389438d5.2546027.rsem.isoforms.results	6ee03f14-14ac-4cb9-bd23-b69704176301	c67.9	1942	null	84.0	null	null	0.0025925925925925925	null	180.0	Primary Tumor	notreported	26283	dead	null	20.0	null	null	null	null	10753857-5737-5671-ac6a-b8d3221aa2f2	c67.9	notreported	-26283	notreported	notreported
OV	c56.9	female	notreported	notreported	white	OV_unc.edu.7c607e77-a353-4995-855b-36ccaaf3bde6.1534219.rsem.isoforms.results	08c64000-d320-4e4d-974b-da503d48890c	c56.9	1944	null	null	null	null	null	null	null	Primary Tumor	notreported	19393	dead	null	1767.0	null	1767.0	null	null	0f6394e0-ad6b-55a6-bb34-cb34cbc020ef	c56.9	notreported	-19393	notreported	notreported
OV	c56.9	female	notreported	nothispanicorlatino	white	OV_unc.edu.66894abe-8af5-4fd9-9a59-cf24e57fc07f.1549569.rsem.isoforms.results	0e475b3d-be3c-431a-ab12-5a867ea8f6cd	c56.9	1947	null	null	null	null	null	null	null	Primary Tumor	notreported	20972	alive	null	null	null	1684.0	null	null	0fbdc72e-a36b-5c66-9042-67e6732464ab	c56.9	notreported	-20972	notreported	notreported
LGG	c71.9	male	notreported	nothispanicorlatino	white	LGG_unc.edu.4daa80a9-f1f3-4b9e-ac8c-e5ee9f276360.1416547.rsem.isoforms.results	0061e9ef-df6a-414e-af64-c88f8192e2d3	c71.9	1963	null	null	null	null	null	null	null	Primary Tumor	notreported	11332	dead	null	4084.0	null	null	null	null	52ea209b-6f5e-51f8-9713-3102640183fa	c71.9	notreported	-11332	notreported	notreported
THCA	c73	female	stagei	nothispanicorlatino	white	THCA_unc.edu.16c0d6f8-cb7a-4fee-a9f8-1b507c4826c7.1327004.rsem.isoforms.results	856893d6-0ed7-422b-ac19-1a5871088805	c73.9	1959	null	null	null	null	null	null	null	Primary Tumor	notreported	15212	alive	null	null	null	4494.0	null	null	f11bede3-b6f4-5a75-9661-c56c89196fa2	c73.9	notreported	-15212	notreported	notreported
THCA	c73	male	stageii	nothispanicorlatino	notreported	THCA_unc.edu.02438862-cd89-48db-a2d0-1f07678d5673.1282672.rsem.isoforms.results	e4b08e66-0772-4956-8670-e5c6553eecbe	c73.9	1940	null	null	null	null	null	null	null	Primary Tumor	notreported	25713	alive	null	null	null	535.0	null	null	e9738bea-3ec8-55ac-ac05-5550fa19fc14	c73.9	notreported	-25713	notreported	notreported
THCA	c73	female	notreported	nothispanicorlatino	blackorafricanamerican	THCA_unc.edu.ff7a84e6-f49c-4832-9e60-7d64cbbf7c2c.1325897.rsem.isoforms.results	3585ddab-fe5e-4a5a-92c7-3cbaff52af57	c73.9	1949	null	null	null	null	null	null	null	Primary Tumor	notreported	18298	alive	null	null	null	4831.0	null	null	90a7cf41-10b8-5b62-b5c8-36da60cd602f	c73.9	notreported	-18298	notreported	notreported
LGG	c71.0	male	notreported	nothispanicorlatino	white	LGG_unc.edu.3d2e42a7-d83f-471b-ac4c-19f3d62eb0ee.2269487.rsem.isoforms.results	b4f4c9b5-bc50-4f35-a7da-fd011c3b2c02	c71.0	1975	null	null	null	null	null	null	null	Primary Tumor	notreported	14007	alive	null	null	null	279.0	null	null	267046a4-ed2c-5c02-90e1-8dc68ee5a139	c71.0	notreported	-14007	notreported	notreported
GBM	c71.9	female	notreported	nothispanicorlatino	white	GBM_unc.edu.f4d31bec-0bf5-4f59-ae0e-37170f1b692e.1532617.rsem.isoforms.results	5327e899-a20d-4571-8236-98454bad574e	c71.9	1953	null	null	null	null	null	null	null	Primary Tumor	notreported	20463	dead	null	98.0	null	98.0	null	null	c6a4df05-ce50-562c-9a34-715ecb1dd3b3	c71.9	notreported	-20463	notreported	notreported
BLCA	c67.9	male	stageii	nothispanicorlatino	white	BLCA_unc.edu.97d051a1-0b25-45eb-a9ac-c2006d89752e.2494201.rsem.isoforms.results	92c6856a-b26f-4512-bbb1-8a8aff4636ab	c67.9	1950	null	111.0	null	null	0.003503345537179649	null	178.0	Primary Tumor	notreported	22035	alive	null	null	null	1761.0	null	null	8c0ccc82-d897-5061-88cc-e87ef37e0747	c67.9	notreported	-22035	notreported	notreported
LGG	c71.0	female	notreported	nothispanicorlatino	white	LGG_unc.edu.d1d2cb40-28df-41a6-af66-1d11168e0803.2408335.rsem.isoforms.results	7e17e6fd-ed83-471f-91e3-5934885c8e87	c71.0	1952	null	null	null	null	null	null	null	Primary Tumor	notreported	22565	alive	null	null	null	174.0	null	null	b0fa09d3-3d8d-519a-b235-10b1d6729329	c71.0	notreported	-22565	notreported	notreported
BLCA	c67.9	female	stageiv	nothispanicorlatino	white	BLCA_unc.edu.94447759-c20c-49f5-b51f-cbfdea41f2e8.1120996.rsem.isoforms.results	3ed614e7-f356-4d87-985b-d3bbbae3bb40	c67.9	1943	null	48.0	null	null	0.002191380569758948	null	148.0	Primary Tumor	notreported	24499	alive	null	null	null	560.0	null	null	701bcb27-3916-56df-845b-aeb00d9c0d57	c67.9	notreported	-24499	notreported	notreported
BLCA	c67.4	male	stageiii	nothispanicorlatino	white	BLCA_unc.edu.d27207d8-a3cf-475b-963a-e393eef98538.2045773.rsem.isoforms.results	8b7556ed-2dab-4180-af5b-0e113e26b36e	c67.4	1936	null	null	null	null	null	null	null	Primary Tumor	notreported	27922	alive	null	null	null	84.0	null	null	dbbe1450-2804-5ed5-888a-4a4cee09b2e4	c67.4	notreported	-27922	notreported	notreported
BLCA	c67.2	female	stageiv	nothispanicorlatino	white	BLCA_unc.edu.f154cc00-e118-4d4c-b9d2-2f1f71e0a964.1373677.rsem.isoforms.results	178b28cd-99c3-48dc-8d09-1ef71b4cee80	c67.2	1932	5.917808219178082	73.0	null	null	0.0028515625	null	160.0	Primary Tumor	notreported	29047	dead	null	413.0	null	121.0	null	null	e90a388f-3338-5f6b-951e-b862615f1980	c67.2	notreported	-29047	notreported	notreported
BLCA	c67.3	male	stageiii	nothispanicorlatino	white	BLCA_unc.edu.f6660fcd-6277-4eb7-8135-5aea56fedd7c.2306137.rsem.isoforms.results	c80e71b3-7c6c-4e16-8446-6dfda780bc18	c67.3	1935	null	148.0	null	null	0.003973261027141668	null	193.0	Primary Tumor	notreported	28328	dead	null	386.0	null	204.0	null	null	3cbf4d2f-6956-5a6b-b950-78935ae4c7f0	c67.3	notreported	-28328	notreported	notreported
GBM	c71.9	male	notreported	nothispanicorlatino	white	GBM_unc.edu.748dc9ed-758b-43c9-af66-111f6ab3d6ce.1540999.rsem.isoforms.results	f4fe7c02-be19-4929-8638-960e5776494c	c71.9	1952	null	null	null	null	null	null	null	Primary Tumor	notreported	21232	dead	null	114.0	null	114.0	null	null	925aa767-393c-5739-b0f9-f2b99cfc72f5	c71.9	notreported	-21232	notreported	notreported
THCA	c73	female	stagei	notreported	notreported	THCA_unc.edu.c837ff28-0b47-400b-a900-72d0a786e62b.1432289.rsem.isoforms.results	aabc7724-71c8-4c1b-a54b-22e88dde148f	c73.9	1978	null	null	null	null	null	null	null	Primary Tumor	notreported	12092	alive	null	null	null	318.0	null	null	0e3df9bf-fd5f-5a88-bc73-f4723177f34d	c73.9	notreported	-12092	notreported	notreported
LGG	c71.9	female	notreported	nothispanicorlatino	white	LGG_unc.edu.40b5eda3-8b01-4cd7-acb5-0ea4e9ff4312.1381105.rsem.isoforms.results	1cc53ade-73c0-492b-a7dc-328269fd0e66	c71.9	1948	null	null	null	null	null	null	null	Primary Tumor	notreported	22847	alive	null	null	null	461.0	null	null	5c975496-baec-5147-8ef1-9699ebf36d16	c71.9	notreported	-22847	notreported	notreported
BLCA	c67.0	male	stageiv	nothispanicorlatino	white	BLCA_unc.edu.4c23170b-a5e0-41c8-8309-a5bfb2823491.2308959.rsem.isoforms.results	d7af7e2c-f742-46ed-814b-1967d7e8c2d2	c67.0	1935	null	64.0	null	null	0.002408822311716662	null	163.0	Primary Tumor	notreported	27816	alive	null	null	null	1094.0	null	null	33d3abee-d2a4-5594-9817-1d0235c162d2	c67.0	notreported	-27816	notreported	notreported
LGG	c71.0	female	notreported	nothispanicorlatino	white	LGG_unc.edu.c38bbaa0-6752-4301-9e44-c1cd13c03625.2089894.rsem.isoforms.results	0167cf11-74be-4701-ab9a-4e057d4bb545	c71.0	1966	null	null	null	null	null	null	null	Primary Tumor	notreported	16945	dead	null	1033.0	null	371.0	null	null	8148b8df-33c4-5282-891e-5ff7eac69adf	c71.0	notreported	-16945	notreported	notreported
THCA	c73	male	stagei	notreported	notreported	THCA_unc.edu.ed6dfced-49e3-47c5-9ef3-86cb52cc8cf5.1564210.rsem.isoforms.results	b2e6933f-50e1-48e3-ae1f-173e1bc889ff	c73.9	1971	null	null	null	null	null	null	null	Primary Tumor	notreported	14864	alive	null	null	null	532.0	null	null	63a67587-c596-5cb3-8079-32602a429e27	c73.9	notreported	-14864	notreported	notreported
OV	c56.9	female	notreported	nothispanicorlatino	white	OV_unc.edu.858a382c-49dc-4990-8c0f-017fedd9a6db.1534788.rsem.isoforms.results	2cb82948-7cbe-4b6c-8414-c02f662de2d0	c56.9	1955	null	null	null	null	null	null	null	Primary Tumor	notreported	16493	dead	null	1516.0	null	null	null	null	2aaa9e6d-1157-5f86-b34f-9c9abf6e82f8	c56.9	notreported	-16493	notreported	notreported
BLCA	c67.9	male	stageiv	nothispanicorlatino	white	BLCA_unc.edu.ec11833d-476a-442e-82c6-f924bea495c1.2650042.rsem.isoforms.results	e7e95597-ef88-4442-8c01-8d633822e7b5	c67.9	1939	3.0684931506849313	75.0	null	null	0.002535154137371552	null	172.0	Primary Tumor	notreported	24877	dead	null	1718.0	null	null	null	null	aa36a53d-a903-5607-a66d-16b857a252f9	c67.9	notreported	-24877	notreported	notreported
LGG	c71.0	female	notreported	hispanicorlatino	white	LGG_unc.edu.ea076ed3-74cd-4313-83d0-a99873058fd7.2331761.rsem.isoforms.results	3431a71c-fabf-440c-b11c-8acfee04724f	c71.0	1970	null	null	null	null	null	null	null	Primary Tumor	notreported	15154	alive	null	null	null	1116.0	null	null	c2cf1618-b35f-50ae-8f38-f6cc9da7289d	c71.0	notreported	-15154	notreported	notreported
OV	c56.9	female	notreported	notreported	white	OV_unc.edu.e5e6f25b-d641-4598-8bb1-0850750ef048.1518648.rsem.isoforms.results	86b513ba-df09-485d-92d4-fb9e888f7350	c56.9	1948	null	null	null	null	null	null	null	Primary Tumor	notreported	20737	dead	null	515.0	null	514.0	null	null	7970b8af-897d-58cd-9c10-f467a239f1d1	c56.9	notreported	-20737	notreported	notreported
THCA	c73	female	stagei	notreported	white	THCA_unc.edu.c4e3be04-2a2c-4abe-912e-c3d9602e29c4.1651612.rsem.isoforms.results	23ad7900-4e99-4abf-82ff-71edeaa8a51c	c73.9	1972	null	null	null	null	null	null	null	Primary Tumor	notreported	10411	alive	null	null	null	477.0	null	null	91937957-b13a-5086-a786-9ed6f0267dd4	c73.9	notreported	-10411	notreported	notreported
BLCA	c67.9	male	stageii	nothispanicorlatino	asian	BLCA_unc.edu.a77cf51f-45de-4a5b-a6ca-6773f8e236d2.2434854.rsem.isoforms.results	854e5236-f2d6-4681-be62-0bead955c926	c67.9	1954	0.7123287671232876	48.0	null	null	0.0019473406629072173	null	157.0	Primary Tumor	notreported	21629	alive	null	null	null	13.0	null	null	cfdd73fd-34a2-5f3f-b714-d1649e05fe43	c67.9	notreported	-21629	notreported	notreported
BLCA	c67.4	male	stageiii	nothispanicorlatino	white	BLCA_unc.edu.f18b7d09-aace-4a7e-839a-6f6eeb189f63.2499677.rsem.isoforms.results	6c5f09f0-2019-4440-8554-e8912bce5e98	c67.4	1939	0.1095890410958904	77.0	null	null	0.00235035560575074	null	181.0	Primary Tumor	notreported	25579	dead	null	1077.0	null	null	null	null	cda5d6f6-4b0b-5023-be3b-0f83a33ad120	c67.4	notreported	-25579	notreported	notreported
OV	c56.9	female	notreported	notreported	white	OV_unc.edu.75435634-4311-49d8-8e42-ae1069c1e2ef.1535189.rsem.isoforms.results	42ebd30b-175e-4ece-a806-e55cb7e40e96	c56.9	1941	null	null	null	null	null	null	null	Primary Tumor	notreported	22933	dead	null	949.0	null	949.0	null	null	0be1c54a-5169-5542-894c-fa5257137496	c56.9	notreported	-22933	notreported	notreported
BLCA	c67.4	male	stageiv	nothispanicorlatino	white	BLCA_unc.edu.bd49f808-37de-43a4-8a5f-7a36b9661a16.1987579.rsem.isoforms.results	6bd85ae2-9d27-4285-a280-4469dd2a8b0a	c67.4	1930	6.082191780821918	104.0	null	null	0.003395918367346939	null	175.0	Primary Tumor	notreported	30276	dead	null	173.0	null	null	null	null	39f361f5-ec1f-56c1-a8a7-fdf62a85e35d	c67.4	notreported	-30276	notreported	notreported
GBM	c71.9	female	notreported	nothispanicorlatino	white	GBM_unc.edu.065048d0-ecbf-4de2-b12a-55e52f8d1279.1545223.rsem.isoforms.results	da5f6940-e8ee-4fd1-a8da-4cd68e02e59c	c71.9	1943	null	null	null	null	null	null	null	Primary Tumor	notreported	22798	dead	null	76.0	null	76.0	null	null	c70b6bb9-28a9-5f2c-b23a-dc84cd58ca1f	c71.9	notreported	-22798	notreported	notreported
THCA	c73	female	stagei	nothispanicorlatino	white	THCA_unc.edu.9b57b16a-e4c3-4290-ab1c-7b3fa30f622d.1665476.rsem.isoforms.results	8a8e05aa-f13a-4142-a335-7aafbee7b664	c73.9	1966	null	null	null	null	null	null	null	Primary Tumor	notreported	17092	alive	null	null	null	461.0	null	null	aa828687-d42b-5aa9-8c4a-90e92edce6a2	c73.9	notreported	-17092	notreported	notreported
THCA	c73	female	stagei	nothispanicorlatino	asian	THCA_unc.edu.a4153890-d27b-4f55-a5e5-5204b7f59392.1655767.rsem.isoforms.results	86b82345-6f4d-44fd-a9db-6f107de62f53	c73.9	1961	null	null	null	null	null	null	null	Primary Tumor	notreported	18932	alive	null	null	null	952.0	null	null	82a9fd3f-23d2-5042-8570-46ada3546987	c73.9	notreported	-18932	notreported	notreported
GBM	c71.9	male	notreported	nothispanicorlatino	white	GBM_unc.edu.0ffc2552-883a-4e8f-9f76-4f37dfce3278.1545045.rsem.isoforms.results	74139255-a635-4c87-814d-3dd04ed630a8	c71.9	1944	null	null	null	null	null	null	null	Recurrent Tumor	notreported	22835	dead	null	317.0	null	313.0	null	null	93a4b78d-276b-560f-82aa-4189c66bba15	c71.9	notreported	-22835	notreported	notreported
BLCA	c67.2	male	stageiii	nothispanicorlatino	white	BLCA_unc.edu.c19f7f59-5df6-4a57-91b0-635817d4fafd.2389526.rsem.isoforms.results	bb38805e-2ccc-4169-ba01-34b98adf5bd0	c67.2	1964	0.00821917808219178	78.0	null	null	0.0024897060231734176	null	177.0	Primary Tumor	notreported	18051	dead	null	272.0	null	null	null	null	b2da66b0-dabe-5b0a-9c3b-332808c74370	c67.2	notreported	-18051	notreported	notreported
THCA	c73	male	stageiii	nothispanicorlatino	white	THCA_unc.edu.84730d14-88bb-4b77-8b04-16229b83dd9d.1926434.rsem.isoforms.results	778a8f53-53f6-4a03-8ce1-b0928539a444	c73.9	1967	null	null	null	null	null	null	null	Primary Tumor	notreported	16541	alive	null	null	null	865.0	null	null	5d776bb8-4d40-5792-9172-6d59e0179788	c73.9	notreported	-16541	notreported	notreported
GBM	c71.9	male	notreported	nothispanicorlatino	white	GBM_unc.edu.a7433808-7fb3-4909-92ae-2d74b32886b0.1539357.rsem.isoforms.results	722f462d-f939-4bc1-aae4-8f78b1335a87	c71.9	1920	null	null	null	null	null	null	null	Primary Tumor	notreported	32612	dead	null	26.0	null	26.0	null	null	db4edf22-e589-5dc0-9804-31abcde574af	c71.9	notreported	-32612	notreported	notreported
THCA	c73	male	stagei	nothispanicorlatino	white	THCA_unc.edu.efa4eabe-882d-48fc-b422-0d612ff64a12.1816412.rsem.isoforms.results	6b529fb3-0b1b-4d3b-9309-bfcb063dbb71	c73.9	1936	null	null	null	null	null	null	null	Primary Tumor	notreported	27946	alive	null	null	null	420.0	null	null	d4bcf5c2-a9d6-5034-aac3-eaad43e6a7d2	c73.9	notreported	-27946	notreported	notreported
THCA	c73	female	stageiii	nothispanicorlatino	blackorafricanamerican	THCA_unc.edu.804a719b-f3a3-44d4-95e3-13578b99706a.2538851.rsem.isoforms.results	7f9fad75-ac3e-4580-b949-80eed07a3230	c73.9	1955	null	null	null	null	null	null	null	Primary Tumor	notreported	21403	alive	null	null	null	434.0	null	null	612f4a8a-7372-5198-a691-95e2df948c49	c73.9	notreported	-21403	notreported	notreported
OV	c56.9	female	notreported	nothispanicorlatino	white	OV_unc.edu.0069c63d-f699-41d4-9798-9a109d1c09df.2723126.rsem.isoforms.results	a9d3a7b0-faf8-4e56-8600-d9e6882a4f23	c56.9	1927	null	null	null	null	null	null	null	Primary Tumor	notreported	29874	dead	null	531.0	null	128.0	null	null	33ef06dd-c3cb-5ba0-b224-c83af2b6171b	c56.9	notreported	-29874	notreported	notreported
[truncated: 965 more rows]
